# Supplementary material for: Image based annotation of Chemogenomic Libraries for Phenotypic Screening
Source: Preprints.org preprint supplement (doi:10.20944/preprints202201.0155.v1), 2022-01-11
Supplement: Supplementary file 1 [file Supplementary Table S4.xlsx]

## Sheet: Fucci assay
compound name	smiles	concentration [µM]	timepoint [h]	biological duplicate	Hoechst High Intensity Objects [%]	Normal Nuclei Count [%]	Healthy Nuclei Count [%]	Fragmented Nuclei Count [%]	Pyknosed Nuclei Count [%]	Green Nuclei Count [%]	Red Nuclei Count [%]	Yellow Nuclei Count [%]
a-Naphthoflavone		10	0	1	0.065	0.935	0.850267	0.0855615	0.0641711	0.647799	0.333333	0.0188679
a-Naphthoflavone		10	0	2	0.061674	0.938326	0.779343	0.103286	0.117371	0.457831	0.475904	0.0662651
a-Naphthoflavone		10	2	1	0.111111	0.888889	0.879464	0.0714286	0.0491071	0.781726	0.167513	0.0507614
a-Naphthoflavone		10	2	2	0.111111	0.888889	0.879464	0.0714286	0.0491071	0.781726	0.167513	0.0507614
a-Naphthoflavone		10	12	1	0.0524476	0.947552	0.841328	0.118081	0.0405904	0.609649	0.364035	0.0263158
a-Naphthoflavone		10	12	2	0.0309278	0.969072	0.815603	0.113475	0.070922	0.53913	0.430435	0.0304348
a-Naphthoflavone		10	26	1	0.0627063	0.937294	0.841549	0.130282	0.028169	0.451883	0.531381	0.0167364
a-Naphthoflavone		10	26	2	0.0212766	0.978723	0.813665	0.136646	0.0496894	0.377863	0.610687	0.0114504
a-Naphthoflavone		10	42	1	0.0438871	0.956113	0.865574	0.0688525	0.0655738	0.340909	0.640152	0.0189394
a-Naphthoflavone		10	42	2	0.02	0.98	0.897959	0.0495627	0.0524781	0.246753	0.75	0.00324675
a-Naphthoflavone		10	70	1	0.0295858	0.970414	0.896341	0.0213415	0.0823171	0.363946	0.632653	0.00340136
a-Naphthoflavone		10	70	2	0.0262467	0.973753	0.919137	0.0296496	0.0512129	0.304985	0.692082	0.00293255
Bromosporine		10	0	1	0.0987124	0.901288	0.838095	0.0619048	0.1	0.596591	0.375	0.0284091
Bromosporine		10	0	2	0.0250896	0.97491	0.794118	0.0882353	0.117647	0.439815	0.481481	0.0787037
Bromosporine		10	2	1	0.0744681	0.925532	0.877395	0.0536398	0.0689655	0.746725	0.213974	0.0393013
Bromosporine		10	2	2	0.0457666	0.954233	0.892086	0.0407674	0.0671463	0.83871	0.137097	0.0241935
Bromosporine		10	12	1	0.10061	0.89939	0.657627	0.244068	0.0983051	0.747423	0.206186	0.0463918
Bromosporine		10	12	2	0.0804598	0.91954	0.79375	0.128125	0.078125	0.779528	0.200787	0.019685
Bromosporine		10	26	1	0.161905	0.838095	0.55303	0.306818	0.140152	0.616438	0.335616	0.0479452
Bromosporine		10	26	2	0.134897	0.865103	0.671186	0.220339	0.108475	0.459596	0.5	0.040404
Bromosporine		10	42	1	0.110687	0.889313	0.463519	0.377682	0.158798	0.611111	0.314815	0.0740741
Bromosporine		10	42	2	0.0952381	0.904762	0.57193	0.284211	0.14386	0.306748	0.631902	0.0613497
Bromosporine		10	70	1	0.0788382	0.921162	0.648649	0.193694	0.157658	0.618056	0.326389	0.0555556
Bromosporine		10	70	2	0.0801394	0.919861	0.598485	0.246212	0.155303	0.398734	0.525316	0.0759494
Camptothecin		10	0	1	0.0409556	0.959044	0.811388	0.088968	0.0996441	0.614035	0.359649	0.0263158
Camptothecin		10	0	2	0.0467836	0.953216	0.815951	0.0920245	0.0920245	0.484962	0.390977	0.12406
Camptothecin		10	2	1	0.141256	0.858744	0.916449	0.0417755	0.0417755	0.774929	0.196581	0.02849
Camptothecin		10	2	2	0.132468	0.867532	0.898204	0.0359281	0.0658683	0.783333	0.186667	0.03
Camptothecin		10	12	1	0.327928	0.672072	0.707775	0.206434	0.0857909	0.742424	0.185606	0.0719697
Camptothecin		10	12	2	0.166667	0.833333	0.554667	0.301333	0.144	0.793269	0.177885	0.0288462
Camptothecin		10	26	1	0.394464	0.605536	0.528571	0.322857	0.148571	0.789189	0.135135	0.0756757
Camptothecin		10	26	2	0.217484	0.782516	0.348774	0.504087	0.147139	0.703125	0.257812	0.0390625
Camptothecin		10	42	1	0.356643	0.643357	0.61413	0.23913	0.146739	0.818584	0.150442	0.0309735
Camptothecin		10	42	2	0.166667	0.833333	0.55	0.302941	0.147059	0.705882	0.283422	0.0106952
Camptothecin		10	70	1	0.34717	0.65283	0.765896	0.118497	0.115607	0.85283	0.0981132	0.0490566
Camptothecin		10	70	2	0.137255	0.862745	0.769886	0.110795	0.119318	0.745387	0.236162	0.0184502
Daunorubicin HCl		10	0	1	0.0429043	0.957096	0.813793	0.0965517	0.0896552	0.65678	0.317797	0.0254237
Daunorubicin HCl		10	0	2	0.044335	0.955665	0.731959	0.118557	0.149485	0.422535	0.521127	0.056338
Daunorubicin HCl		10	2	1	0.0369393	0.963061	1	0	0	0.293151	0.00273973	0.70411
Daunorubicin HCl		10	2	2	0.0369393	0.963061	1	0	0	0.293151	0.00273973	0.70411
Daunorubicin HCl		10	12	1	0.0335196	0.96648	1	0	0	0.104046	0.00578035	0.890173
Daunorubicin HCl		10	12	2	0.0283019	0.971698	0.995146	0.00485437	0	0.0390244	0	0.960976
Daunorubicin HCl		10	26	1	0.0205279	0.979472	1	0	0	0.0538922	0	0.946108
Daunorubicin HCl		10	26	2	0.0458716	0.954128	1	0	0	0.0432692	0	0.956731
Daunorubicin HCl		10	42	1	0.0163399	0.98366	1	0	0	0.0299003	0.00332226	0.966777
Daunorubicin HCl		10	42	2	0.0353535	0.964646	1	0	0	0.0314136	0.0052356	0.963351
Daunorubicin HCl		10	70	1	0.0234899	0.97651	1	0	0	0.0309278	0.00343643	0.965636
Daunorubicin HCl		10	70	2	0.0146341	0.985366	1	0	0	0.0247525	0.0049505	0.970297
DMSO		10	0	1	0.0242718	0.975728	0.781095	0.0845771	0.134328	0.490446	0.43949	0.0700637
DMSO		10	0	2	0.0637255	0.936275	0.743455	0.120419	0.136126	0.485915	0.457746	0.056338
DMSO		10	2	1	0.0553191	0.944681	0.815315	0.0855856	0.0990991	0.745856	0.237569	0.0165746
DMSO		10	2	2	0.03	0.97	0.865979	0.0687285	0.0652921	0.777778	0.190476	0.031746
DMSO		10	12	1	0.0179211	0.982079	0.835766	0.0839416	0.080292	0.484716	0.50655	0.00873362
DMSO		10	12	2	0.0304183	0.969582	0.843137	0.101961	0.054902	0.413953	0.581395	0.00465116
DMSO		10	26	1	0.0552885	0.944712	0.83715	0.111959	0.0508906	0.43465	0.550152	0.0151976
DMSO		10	26	2	0.0382166	0.961783	0.830022	0.110375	0.0596026	0.510638	0.470745	0.018617
DMSO		10	42	1	0.0302267	0.969773	0.961039	0.025974	0.012987	0.337838	0.662162	0
DMSO		10	42	2	0.0429293	0.957071	0.934037	0.0422164	0.0237467	0.361582	0.638418	0
DMSO		10	70	1	0.0525328	0.947467	0.893069	0.0475248	0.0594059	0.2949	0.665188	0.0399113
DMSO		10	70	2	0.0375	0.9625	0.925974	0.0428571	0.0311688	0.447405	0.537167	0.0154278
Doxorubicin (Adriamycin) HCl		10	0	1	0.0771812	0.922819	0.803636	0.08	0.116364	0.597285	0.375566	0.0271493
Doxorubicin (Adriamycin) HCl		10	0	2	0.0287081	0.971292	0.684729	0.192118	0.123153	0.381295	0.561151	0.057554
Doxorubicin (Adriamycin) HCl		10	2	1	0.0594901	0.94051	0.972892	0.0150602	0.0120482	0.724458	0.0959752	0.179567
Doxorubicin (Adriamycin) HCl		10	2	2	0.0594901	0.94051	0.972892	0.0150602	0.0120482	0.724458	0.0959752	0.179567
Doxorubicin (Adriamycin) HCl		10	12	1	0.0341615	0.965839	1	0	0	0.440514	0.0385852	0.5209
Doxorubicin (Adriamycin) HCl		10	12	2	0.0229358	0.977064	0.99061	0.00469484	0.00469484	0.184834	0.0331754	0.781991
Doxorubicin (Adriamycin) HCl		10	26	1	0.0348101	0.96519	1	0	0	0.22623	0.0131148	0.760656
Doxorubicin (Adriamycin) HCl		10	26	2	0.0366972	0.963303	0.990476	0	0.00952381	0.0961538	0.0192308	0.884615
Doxorubicin (Adriamycin) HCl		10	42	1	0.0352113	0.964789	1	0	0	0.0948905	0.0109489	0.894161
Doxorubicin (Adriamycin) HCl		10	42	2	0.0176471	0.982353	1	0	0	0.0958084	0.0179641	0.886228
Doxorubicin (Adriamycin) HCl		10	70	1	0.0277778	0.972222	0.991837	0.00816327	0	0.0576132	0.00823045	0.934156
Doxorubicin (Adriamycin) HCl		10	70	2	0.0246914	0.975309	1	0	0	0.0632911	0.00632911	0.93038
HI-TOPK-032		10	0	1	0.0641711	0.935829	0.765714	0.142857	0.0914286	0.634328	0.358209	0.00746269
HI-TOPK-032		10	0	2	0.0386473	0.961353	0.688442	0.115578	0.19598	0.386861	0.532847	0.080292
HI-TOPK-032		10	2	1	0.059633	0.940367	0.853659	0.0292683	0.117073	0.314286	0.0457143	0.64
HI-TOPK-032		10	2	2	0.059633	0.940367	0.853659	0.0292683	0.117073	0.314286	0.0457143	0.64
HI-TOPK-032		10	12	1	0.0842912	0.915709	0.857741	0.0962343	0.0460251	0.195122	0.117073	0.687805
HI-TOPK-032		10	12	2	0.0627306	0.937269	0.862205	0.0669291	0.0708661	0.0730594	0.0365297	0.890411
HI-TOPK-032		10	26	1	0.0845588	0.915441	0.819277	0.116466	0.064257	0.161765	0.161765	0.676471
HI-TOPK-032		10	26	2	0.0486322	0.951368	0.878594	0.0798722	0.0415335	0.04	0.08	0.88
HI-TOPK-032		10	42	1	0.042471	0.957529	0.802419	0.125	0.0725806	0.145729	0.236181	0.61809
HI-TOPK-032		10	42	2	0.0412621	0.958738	0.929114	0.0278481	0.043038	0.0626703	0.0899183	0.847411
HI-TOPK-032		10	70	1	0.0443686	0.955631	0.853571	0.1	0.0464286	0.154812	0.263598	0.58159
HI-TOPK-032		10	70	2	0.0348361	0.965164	0.942675	0.0276008	0.029724	0.0900901	0.119369	0.790541
JH-XI-05-01 (SRPKIN-1)		10	0	1	0.0684932	0.931507	0.882353	0.0661765	0.0514706	0.645833	0.325	0.0291667
JH-XI-05-01 (SRPKIN-1)		10	0	2	0.0466102	0.95339	0.737778	0.137778	0.124444	0.445783	0.518072	0.0361446
JH-XI-05-01 (SRPKIN-1)		10	2	1	0.0751445	0.924855	0.915625	0.028125	0.05625	0.720137	0.238908	0.0409556
JH-XI-05-01 (SRPKIN-1)		10	2	2	0.0751445	0.924855	0.915625	0.028125	0.05625	0.720137	0.238908	0.0409556
JH-XI-05-01 (SRPKIN-1)		10	12	1	0.0765432	0.923457	0.858289	0.0909091	0.0508021	0.676012	0.286604	0.0373832
JH-XI-05-01 (SRPKIN-1)		10	12	2	0.0553846	0.944615	0.908795	0.0651466	0.0260586	0.702509	0.272401	0.0250896
JH-XI-05-01 (SRPKIN-1)		10	26	1	0.0506608	0.949339	0.823666	0.116009	0.0603248	0.48169	0.484507	0.0338028
JH-XI-05-01 (SRPKIN-1)		10	26	2	0.0567901	0.94321	0.903141	0.0628272	0.0340314	0.53913	0.434783	0.026087
JH-XI-05-01 (SRPKIN-1)		10	42	1	0.0474308	0.952569	0.821577	0.107884	0.0705394	0.373737	0.603535	0.0227273
JH-XI-05-01 (SRPKIN-1)		10	42	2	0.0459184	0.954082	0.907308	0.0659537	0.026738	0.361493	0.632613	0.00589391
JH-XI-05-01 (SRPKIN-1)		10	70	1	0.0340502	0.96595	0.879406	0.0612245	0.0593692	0.299578	0.681435	0.0189873
JH-XI-05-01 (SRPKIN-1)		10	70	2	0.0385675	0.961433	0.934097	0.0272206	0.0386819	0.355828	0.644172	0
Milciclib		10	0	1	0.0451128	0.954887	0.775591	0.0669291	0.15748	0.705584	0.269036	0.0253807
Milciclib		10	0	2	0.0424929	0.957507	0.769231	0.10355	0.127219	0.503846	0.369231	0.126923
Milciclib		10	2	1	0.0384615	0.961538	0.747692	0.104615	0.147692	0.691358	0.263374	0.0452675
Milciclib		10	2	2	0.0425532	0.957447	0.777778	0.106667	0.115556	0.742857	0.228571	0.0285714
Milciclib		10	12	1	0.0484848	0.951515	0.738854	0.16242	0.0987261	0.551724	0.439655	0.00862069
Milciclib		10	12	2	0.0746988	0.925301	0.770833	0.132812	0.0963542	0.236486	0.746622	0.0168919
Milciclib		10	26	1	0.0448276	0.955172	0.711191	0.169675	0.119134	0.192893	0.786802	0.0203046
Milciclib		10	26	2	0.0657534	0.934247	0.829912	0.085044	0.085044	0.0989399	0.897527	0.00353357
Milciclib		10	42	1	0.0572687	0.942731	0.696262	0.0981308	0.205607	0.248322	0.751678	0
Milciclib		10	42	2	0.0442804	0.95572	0.787645	0.0810811	0.131274	0.127451	0.867647	0.00490196
Milciclib		10	70	1	0.030837	0.969163	0.713636	0.122727	0.163636	0.33758	0.66242	0
Milciclib		10	70	2	0.0342205	0.965779	0.811024	0.0787402	0.110236	0.165049	0.834951	0
Mitoxantrone 2HCl		10	0	1	0.15122	0.84878	0.862069	0.0632184	0.0747126	0.626667	0.366667	0.00666667
Mitoxantrone 2HCl		10	0	2	0.0459364	0.954064	0.811111	0.103704	0.0851852	0.479452	0.388128	0.13242
Mitoxantrone 2HCl		10	2	1	0.110092	0.889908	0.927835	0.0206186	0.0515464	0.766667	0.194444	0.0388889
Mitoxantrone 2HCl		10	2	2	0.110092	0.889908	0.927835	0.0206186	0.0515464	0.766667	0.194444	0.0388889
Mitoxantrone 2HCl		10	12	1	0.0707547	0.929245	0.93401	0.0609137	0.00507614	0.711957	0.26087	0.0271739
Mitoxantrone 2HCl		10	12	2	0.0233333	0.976667	0.935154	0.0511945	0.0136519	0.850365	0.145985	0.00364964
Mitoxantrone 2HCl		10	26	1	0.0603015	0.939698	0.946524	0.0481283	0.00534759	0.762712	0.20904	0.0282486
Mitoxantrone 2HCl		10	26	2	0.029304	0.970696	0.966038	0.0226415	0.0113208	0.863281	0.132812	0.00390625
Mitoxantrone 2HCl		10	42	1	0.0505618	0.949438	0.940828	0.0591716	0	0.704403	0.257862	0.0377358
Mitoxantrone 2HCl		10	42	2	0.0344828	0.965517	0.969388	0.0204082	0.0102041	0.789474	0.210526	0
Mitoxantrone 2HCl		10	70	1	0.0658683	0.934132	0.967949	0.025641	0.00641026	0.688742	0.298013	0.013245
Mitoxantrone 2HCl		10	70	2	0.0452261	0.954774	0.984211	0.0105263	0.00526316	0.780749	0.219251	0
Paclitaxel		10	0	1	0.0561798	0.94382	0.84127	0.0833333	0.0753968	0.632075	0.330189	0.0377358
Paclitaxel		10	0	2	0.031477	0.968523	0.855	0.0625	0.0825	0.453216	0.415205	0.131579
Paclitaxel		10	2	1	0.0415335	0.958466	0.876667	0.05	0.0733333	0.802281	0.171103	0.026616
Paclitaxel		10	2	2	0.0321782	0.967822	0.815857	0.0588235	0.12532	0.780564	0.194357	0.0250784
Paclitaxel		10	12	1	0.0599369	0.940063	0.637584	0.124161	0.238255	0.705263	0.252632	0.0421053
Paclitaxel		10	12	2	0.0531697	0.94683	0.531317	0.168467	0.300216	0.630081	0.325203	0.0447154
Paclitaxel		10	26	1	0.0815047	0.918495	0.542662	0.228669	0.228669	0.389937	0.490566	0.119497
Paclitaxel		10	26	2	0.107595	0.892405	0.503546	0.229314	0.267139	0.333333	0.577465	0.0892019
Paclitaxel		10	42	1	0.062963	0.937037	0.581028	0.221344	0.197628	0.319728	0.666667	0.0136054
Paclitaxel		10	42	2	0.103261	0.896739	0.551515	0.230303	0.218182	0.291209	0.686813	0.021978
Paclitaxel		10	70	1	0.0898438	0.910156	0.678112	0.133047	0.188841	0.341772	0.601266	0.056962
Paclitaxel		10	70	2	0.0797721	0.920228	0.678019	0.133127	0.188854	0.356164	0.607306	0.0365297
Panobinostat		10	0	1	0.0658915	0.934109	0.829876	0.107884	0.0622407	0.665	0.325	0.01
Panobinostat		10	0	2	0.0683761	0.931624	0.770642	0.0917431	0.137615	0.505952	0.434524	0.0595238
Panobinostat		10	2	1	0.0387097	0.96129	0.916107	0.0436242	0.0402685	0.769231	0.208791	0.021978
Panobinostat		10	2	2	0.0387097	0.96129	0.916107	0.0436242	0.0402685	0.769231	0.208791	0.021978
Panobinostat		10	12	1	0.0570652	0.942935	0.878963	0.0403458	0.0806916	0.67541	0.304918	0.0196721
Panobinostat		10	12	2	0.0721649	0.927835	0.807407	0.0666667	0.125926	0.720183	0.266055	0.0137615
Panobinostat		10	26	1	0.0673575	0.932642	0.588889	0.227778	0.183333	0.584906	0.372642	0.0424528
Panobinostat		10	26	2	0.0993377	0.900662	0.650735	0.194853	0.154412	0.542373	0.429379	0.0282486
Panobinostat		10	42	1	0.104348	0.895652	0.543689	0.249191	0.20712	0.654762	0.27381	0.0714286
Panobinostat		10	42	2	0.126712	0.873288	0.6	0.164706	0.235294	0.581699	0.379085	0.0392157
Panobinostat		10	70	1	0.106195	0.893805	0.768977	0.0825083	0.148515	0.712446	0.227468	0.0600858
Panobinostat		10	70	2	0.119863	0.880137	0.719844	0.101167	0.178988	0.637838	0.318919	0.0432432
Puromycin 2HCl		10	0	1	0.0771704	0.92283	0.832753	0.097561	0.0696864	0.661088	0.322176	0.0167364
Puromycin 2HCl		10	0	2	0.0654206	0.934579	0.755	0.125	0.12	0.370861	0.576159	0.0529801
Puromycin 2HCl		10	2	1	0.0524862	0.947514	0.912536	0.03207	0.0553936	0.808307	0.172524	0.0191693
Puromycin 2HCl		10	2	2	0.0524862	0.947514	0.912536	0.03207	0.0553936	0.808307	0.172524	0.0191693
Puromycin 2HCl		10	12	1	0.0399113	0.960089	0.852194	0.0923788	0.0554273	0.598916	0.379404	0.0216802
Puromycin 2HCl		10	12	2	0.0671642	0.932836	0.824	0.104	0.072	0.538835	0.436893	0.0242718
Puromycin 2HCl		10	26	1	0.0431373	0.956863	0.848361	0.0922131	0.0594262	0.379227	0.603865	0.0169082
Puromycin 2HCl		10	26	2	0.0432277	0.956772	0.849398	0.120482	0.0301205	0.460993	0.535461	0.0035461
Puromycin 2HCl		10	42	1	0.0383973	0.961603	0.876736	0.0538194	0.0694444	0.314851	0.671287	0.0138614
Puromycin 2HCl		10	42	2	0.027027	0.972973	0.940171	0.0405983	0.0192308	0.45	0.547727	0.00227273
Puromycin 2HCl		10	70	1	0.0512821	0.948718	0.912162	0.0567568	0.0310811	0.413333	0.565926	0.0207407
Puromycin 2HCl		10	70	2	0.0543131	0.945687	0.935811	0.0472973	0.0168919	0.429603	0.570397	0
Staurosporine		10	0	1	0.0395257	0.960474	0.839506	0.090535	0.0699588	0.607843	0.372549	0.0196078
Staurosporine		10	0	2	0.0470588	0.952941	0.814815	0.0925926	0.0925926	0.477273	0.382576	0.140152
Staurosporine		10	2	1	0.0579268	0.942073	0.708738	0.100324	0.190939	0.817352	0.173516	0.00913242
Staurosporine		10	2	2	0.0625	0.9375	0.726316	0.0561404	0.217544	0.811594	0.164251	0.0241546
Staurosporine		10	12	1	0.0788644	0.921136	0.181507	0.476027	0.342466	0.754717	0.226415	0.0188679
Staurosporine		10	12	2	0.137741	0.862259	0.166134	0.57508	0.258786	0.769231	0.153846	0.0769231
Staurosporine		10	26	1	0.0888158	0.911184	0.252708	0.440433	0.306859	0.742857	0.171429	0.0857143
Staurosporine		10	26	2	0.08	0.92	0.375776	0.369565	0.254658	0.760331	0.214876	0.0247934
Staurosporine		10	42	1	0.077193	0.922807	0.562738	0.193916	0.243346	0.777027	0.175676	0.0472973
Staurosporine		10	42	2	0.0833333	0.916667	0.693603	0.148148	0.158249	0.76699	0.199029	0.0339806
Staurosporine		10	70	1	0.0763636	0.923636	0.677165	0.169291	0.153543	0.860465	0.104651	0.0348837
Staurosporine		10	70	2	0.0990415	0.900958	0.79078	0.0780142	0.131206	0.73991	0.219731	0.0403587
T3-CLK		10	0	1	0.09	0.91	0.85348	0.0805861	0.0659341	0.532189	0.44206	0.0257511
T3-CLK		10	0	2	0.0452675	0.954733	0.823276	0.0474138	0.12931	0.465969	0.455497	0.078534
T3-CLK		10	2	1	0.0560472	0.943953	0.884375	0.03125	0.084375	0.805654	0.14841	0.0459364
T3-CLK		10	2	2	0.0560472	0.943953	0.884375	0.03125	0.084375	0.805654	0.14841	0.0459364
T3-CLK		10	12	1	0.0471976	0.952802	0.786378	0.111455	0.102167	0.468504	0.488189	0.0433071
T3-CLK		10	12	2	0.0928571	0.907143	0.724409	0.141732	0.133858	0.228261	0.771739	0
T3-CLK		10	26	1	0.110482	0.889518	0.691083	0.194268	0.11465	0.262673	0.663594	0.0737327
T3-CLK		10	26	2	0.183746	0.816254	0.506494	0.25974	0.233766	0.282051	0.709402	0.00854701
T3-CLK		10	42	1	0.184971	0.815029	0.450355	0.375887	0.173759	0.480315	0.370079	0.149606
T3-CLK		10	42	2	0.174545	0.825455	0.462555	0.317181	0.220264	0.542857	0.419048	0.0380952
T3-CLK		10	70	1	0.150502	0.849498	0.476378	0.248031	0.275591	0.669421	0.214876	0.115702
T3-CLK		10	70	2	0.141264	0.858736	0.489177	0.264069	0.246753	0.637168	0.345133	0.0176991
Topotecan HCl		10	0	1	0.0795848	0.920415	0.834586	0.0676692	0.0977444	0.626126	0.36036	0.0135135
Topotecan HCl		10	0	2	0.0798122	0.920188	0.806122	0.107143	0.0867347	0.512658	0.436709	0.0506329
Topotecan HCl		10	2	1	0.248945	0.751055	0.94382	0.0168539	0.0393258	0.806548	0.127976	0.0654762
Topotecan HCl		10	2	2	0.248945	0.751055	0.94382	0.0168539	0.0393258	0.806548	0.127976	0.0654762
Topotecan HCl		10	12	1	0.26971	0.73029	0.6875	0.21875	0.09375	0.789256	0.136364	0.0743802
Topotecan HCl		10	12	2	0.307888	0.692112	0.716912	0.158088	0.125	0.841026	0.117949	0.0410256
Topotecan HCl		10	26	1	0.290254	0.709746	0.453731	0.402985	0.143284	0.677632	0.171053	0.151316
Topotecan HCl		10	26	2	0.32266	0.67734	0.465455	0.370909	0.163636	0.742188	0.210938	0.046875
Topotecan HCl		10	42	1	0.245863	0.754137	0.561129	0.285266	0.153605	0.815642	0.0949721	0.0893855
Topotecan HCl		10	42	2	0.283626	0.716374	0.62449	0.244898	0.130612	0.784314	0.189542	0.0261438
Topotecan HCl		10	70	1	0.238693	0.761307	0.742574	0.132013	0.125413	0.88	0.0444444	0.0755556
Topotecan HCl		10	70	2	0.225705	0.774295	0.797571	0.105263	0.097166	0.822335	0.121827	0.0558376
Trametinib		10	0	1	0.0541667	0.945833	0.837004	0.0969163	0.0660793	0.647368	0.331579	0.0210526
Trametinib		10	0	2	0.0436681	0.956332	0.853881	0.0639269	0.0821918	0.481283	0.475936	0.0427807
Trametinib		10	2	1	0.045614	0.954386	0.860294	0.0477941	0.0919118	0.794872	0.15812	0.0470085
Trametinib		10	2	2	0.045614	0.954386	0.860294	0.0477941	0.0919118	0.794872	0.15812	0.0470085
Trametinib		10	12	1	0.0600601	0.93994	0.811502	0.13099	0.057508	0.625984	0.330709	0.0433071
Trametinib		10	12	2	0.0345912	0.965409	0.837134	0.0977199	0.0651466	0.48249	0.51751	0
Trametinib		10	26	1	0.0443787	0.955621	0.832817	0.102167	0.0650155	0.197026	0.788104	0.0148699
Trametinib		10	26	2	0.0375723	0.962428	0.891892	0.0660661	0.042042	0.161616	0.838384	0
Trametinib		10	42	1	0.039039	0.960961	0.8875	0.0625	0.05	0.112676	0.883803	0.00352113
Trametinib		10	42	2	0.0409836	0.959016	0.94302	0.031339	0.025641	0.0996979	0.900302	0
Trametinib		10	70	1	0.0488506	0.951149	0.882175	0.0634441	0.0543807	0.113014	0.886986	0
Trametinib		10	70	2	0.0526316	0.947368	0.941667	0.0305556	0.0277778	0.103245	0.896755	0
Vinorelbine Tartrate		10	0	1	0.0618893	0.938111	0.847222	0.0833333	0.0694444	0.569672	0.413934	0.0163934
Vinorelbine Tartrate		10	0	2	0.0482759	0.951724	0.869565	0.0869565	0.0434783	0.4125	0.529167	0.0583333
Vinorelbine Tartrate		10	2	1	0.0534125	0.946588	0.887147	0.0532915	0.0595611	0.833922	0.159011	0.00706714
Vinorelbine Tartrate		10	2	2	0.0534125	0.946588	0.887147	0.0532915	0.0595611	0.833922	0.159011	0.00706714
Vinorelbine Tartrate		10	12	1	0.0906433	0.909357	0.681672	0.122186	0.196141	0.79717	0.179245	0.0235849
Vinorelbine Tartrate		10	12	2	0.0571429	0.942857	0.556818	0.219697	0.223485	0.85034	0.122449	0.0272109
Vinorelbine Tartrate		10	26	1	0.103245	0.896755	0.572368	0.177632	0.25	0.494253	0.45977	0.045977
Vinorelbine Tartrate		10	26	2	0.129032	0.870968	0.460905	0.251029	0.288066	0.419643	0.508929	0.0714286
Vinorelbine Tartrate		10	42	1	0.0873786	0.912621	0.585106	0.156028	0.258865	0.436364	0.515152	0.0484848
Vinorelbine Tartrate		10	42	2	0.0724638	0.927536	0.46875	0.222656	0.308594	0.325	0.65	0.025
Vinorelbine Tartrate		10	70	1	0.0791139	0.920886	0.632302	0.130584	0.237113	0.494565	0.456522	0.048913
Vinorelbine Tartrate		10	70	2	0.0595238	0.940476	0.632911	0.0970464	0.270042	0.566667	0.42	0.0133333
YM155 (Sepantronium Bromide)		10	0	1	0.0702341	0.929766	0.834532	0.100719	0.0647482	0.616379	0.37069	0.012931
YM155 (Sepantronium Bromide)		10	0	2	0.05	0.95	0.76555	0.133971	0.100478	0.4625	0.43125	0.10625
YM155 (Sepantronium Bromide)		10	2	1	0.0350877	0.964912	0.878788	0.0424242	0.0787879	0.744828	0.224138	0.0310345
YM155 (Sepantronium Bromide)		10	2	2	0.0350877	0.964912	0.878788	0.0424242	0.0787879	0.744828	0.224138	0.0310345
YM155 (Sepantronium Bromide)		10	12	1	0.0615836	0.938416	0.396875	0.25	0.353125	0.787402	0.149606	0.0629921
YM155 (Sepantronium Bromide)		10	12	2	0.0671937	0.932806	0.338983	0.173729	0.487288	0.8875	0.075	0.0375
YM155 (Sepantronium Bromide)		10	26	1	0.0504451	0.949555	0.190625	0.496875	0.3125	0.868852	0.0983607	0.0327869
YM155 (Sepantronium Bromide)		10	26	2	0.0581395	0.94186	0.242798	0.419753	0.337449	0.915254	0.0677966	0.0169492
YM155 (Sepantronium Bromide)		10	42	1	0.0860534	0.913947	0.217532	0.558442	0.224026	0.850746	0.149254	0
YM155 (Sepantronium Bromide)		10	42	2	0.0588235	0.941176	0.320833	0.433333	0.245833	0.844156	0.116883	0.038961
YM155 (Sepantronium Bromide)		10	70	1	0.108434	0.891566	0.456081	0.337838	0.206081	0.866667	0.0814815	0.0518519
YM155 (Sepantronium Bromide)		10	70	2	0.106122	0.893878	0.506849	0.251142	0.242009	0.81982	0.0990991	0.0810811
