# Supplementary material for: Image based annotation of Chemogenomic Libraries for Phenotypic Screening
Source: Preprints.org preprint supplement (doi:10.20944/preprints202201.0155.v1), 2022-01-11
Supplement: Supplementary file 2 [file Supplementary Table S8.xlsx]

## Sheet: Sheet1
compound name	Type of Screen	EUbOPEN ID	Smiles	experimental type	Assay Concentration (uM)	Experimental Timepoint (h)	Multiplex Cell Line	Number of biological Replicate	Growth Rate (GR)	Total Cell Count	Population Hoechst High Intensity Objects (%)	Population Normal (%)	Population Apoptotic (%)	Population Healthy Nuclei (%)	Population Fragmented Nuclei (%)	Population Pyknosed Nuclei (%)	Population Mitotic Cells (%)	Population Tubulin-Different-Phenotype (%)	Population Mitochondria Different-Phenotype (%)	Population Membrane Permeable-Phenotype (%)	Control DMSO Total Cells	Control DMSO Apoptotic Cells (%)	Control DMSO Healthy Nuclei (%)	Control DMSO Fragmented Nuclei %	Control DMSO Pyknosed Nuclei (%)	Control DMSO Mitotic Cells (%)	Control DMSO Tubulin Phenotype Different Cells (%)	Control DMSO Mitochondria Different-Phenotype Cells (%)	Control DMSO Membrane Permeable-Phenotype Cells (%)	Control DMSO Growth Rate	multiplex comment
640	Multiplex	EUB0000175a	CC(C)c1cc(Nc2nc(N3CCC[C@H](N)C3)ncc2C(N)=O)cc(C(C)C)n1	Chemogenomic candidate	1	0	human fibroblast	1	0	146	0.157534	0.842466	0.666667	0.268293	0.390244	0.341463	0.333333	0.242424	0.212121	0.151515	125.417	0.662404	0.310276	0.328567	0.361157	0.337596	0.203306	0.230525	0.0840641	#DIV/0!	tag healthy nuclei < 50 %
640	Multiplex	EUB0000175a	CC(C)c1cc(Nc2nc(N3CCC[C@H](N)C3)ncc2C(N)=O)cc(C(C)C)n2	Chemogenomic candidate	10	0	human fibroblast	1	0	96	0.166667	0.833333	0.636364	0.3375	0.25	0.4125	0.363636	0.259259	0.333333	0.111111	125.417	0.662404	0.310276	0.328567	0.361157	0.337596	0.203306	0.230525	0.0840641	#DIV/0!	tag healthy nuclei < 50 %
640	Multiplex	EUB0000175a	CC(C)c1cc(Nc2nc(N3CCC[C@H](N)C3)ncc2C(N)=O)cc(C(C)C)n3	Chemogenomic candidate	1	0	HEK293T	2	0	157	0.089172	0.910828	0.0434783	0.251748	0.104895	0.643357	0.956522	0.0277778	0.222222	0	233.167	0.0929753	0.24237	0.0798532	0.677777	0.907025	0.0412417	0.171457	0.0110984	#DIV/0!	tag healthy nuclei < 50 %
640	Multiplex	EUB0000175a	CC(C)c1cc(Nc2nc(N3CCC[C@H](N)C3)ncc2C(N)=O)cc(C(C)C)n4	Chemogenomic candidate	10	0	HEK293T	2	0	242	0.0619835	0.938017	0.068323	0.237885	0.0528634	0.709251	0.931677	0.0185185	0.166667	0	233.167	0.0929753	0.24237	0.0798532	0.677777	0.907025	0.0412417	0.171457	0.0110984	#DIV/0!	tag healthy nuclei < 50 %
640	Multiplex	EUB0000175a	CC(C)c1cc(Nc2nc(N3CCC[C@H](N)C3)ncc2C(N)=O)cc(C(C)C)n5	Chemogenomic candidate	10	12	HEK293T	2	-0.788683	206	0.0582524	0.941748	0.641176	0.0515464	0.0721649	0.876289	0.358824	0.4	0.9	0.1	256.75	0.112092	0.454373	0.0637918	0.481836	0.887908	0.182057	0.132768	0.0724535	1.03765	tag healthy nuclei < 50 %, tag mitochondrial mass > 50 %
640	Multiplex	EUB0000175a	CC(C)c1cc(Nc2nc(N3CCC[C@H](N)C3)ncc2C(N)=O)cc(C(C)C)n6	Chemogenomic candidate	10	0	HEK293T	1	0	323	0.102167	0.897833	0.36019	0.206897	0.0655172	0.727586	0.63981	0.0333333	0.783333	0.0166667	256.5	0.333294	0.212413	0.0958204	0.691766	0.666706	0.0141172	0.774309	0.00115741	#DIV/0!	tag healthy nuclei < 50 %, tag mitochondrial mass > 50 %
640	Multiplex	EUB0000175a	CC(C)c1cc(Nc2nc(N3CCC[C@H](N)C3)ncc2C(N)=O)cc(C(C)C)n7	Chemogenomic candidate	10	24	HEK293T	1	-0.886963	321	0.224299	0.775701	0.907767	0.0281124	0.144578	0.827309	0.092233	0.285714	1	0	293.167	0.429543	0.395461	0.147538	0.457001	0.570457	0.312274	0.510446	0.0420248	1.14297	tag healthy nuclei < 50 %, tag mitochondrial mass > 50 %
640	Multiplex	EUB0000175a	CC(C)c1cc(Nc2nc(N3CCC[C@H](N)C3)ncc2C(N)=O)cc(C(C)C)n8	Chemogenomic candidate	10	12	HEK293T	1	-0.804383	313	0.188498	0.811502	0.881818	0.0629921	0.0708661	0.866142	0.118182	0.4375	0.9375	0	274.667	0.427177	0.372026	0.131275	0.496699	0.572823	0.324854	0.687273	0.0469186	1.209	tag healthy nuclei < 50 %, tag mitochondrial mass > 50 %
640	Multiplex	EUB0000175a	CC(C)c1cc(Nc2nc(N3CCC[C@H](N)C3)ncc2C(N)=O)cc(C(C)C)n9	Chemogenomic candidate	1	0	HEK293T	1	0	250	0.124	0.876	0.301282	0.232877	0.0547945	0.712329	0.698718	0.0392157	0.745098	0	256.5	0.333294	0.212413	0.0958204	0.691766	0.666706	0.0141172	0.774309	0.00115741	#DIV/0!	tag healthy nuclei < 50 %, tag mitochondrial mass > 50 %
640	Multiplex	EUB0000175a	CC(C)c1cc(Nc2nc(N3CCC[C@H](N)C3)ncc2C(N)=O)cc(C(C)C)n10	Chemogenomic candidate	10	12	human fibroblast	1	-0.109705	96	0.28125	0.71875	0.590909	0.376812	0.304348	0.318841	0.409091	0.769231	0.307692	0.346154	107.083	0.631736	0.44459	0.220734	0.334676	0.368264	0.315502	0.0769574	0.274792	1.29875	tag healthy nuclei < 50 %, tag tubulin effect > 50 %
640	Multiplex	EUB0000175a	CC(C)c1cc(Nc2nc(N3CCC[C@H](N)C3)ncc2C(N)=O)cc(C(C)C)n11	Chemogenomic candidate	1	48	human fibroblast	1	0.240938	162	0.376543	0.623457	0.7	0.405941	0.29703	0.29703	0.3	0.682927	0.0731707	0.341463	110.667	0.531499	0.514801	0.276708	0.208491	0.468501	0.298464	0.0241518	0.276892	5.201	tag healthy nuclei < 50 %, tag tubulin effect > 50 %
640	Multiplex	EUB0000175a	CC(C)c1cc(Nc2nc(N3CCC[C@H](N)C3)ncc2C(N)=O)cc(C(C)C)n12	Chemogenomic candidate	1	12	human fibroblast	1	0.808162	127	0.133858	0.866142	0.575758	0.363636	0.336364	0.3	0.424242	0.825	0.225	0.225	107.083	0.631736	0.44459	0.220734	0.334676	0.368264	0.315502	0.0769574	0.274792	1.29875	tag healthy nuclei < 50 %, tag tubulin effect > 50 %
640	Multiplex	EUB0000175a	CC(C)c1cc(Nc2nc(N3CCC[C@H](N)C3)ncc2C(N)=O)cc(C(C)C)n13	Chemogenomic candidate	10	24	human fibroblast	1	0.153921	92	0.25	0.75	0.636364	0.42029	0.26087	0.318841	0.363636	0.827586	0.448276	0.172414	106.75	0.494315	0.513538	0.210808	0.275654	0.505685	0.339408	0.0326339	0.298699	1.11839	tag healthy nuclei < 50 %, tag tubulin effect > 50 %
640	Multiplex	EUB0000175a	CC(C)c1cc(Nc2nc(N3CCC[C@H](N)C3)ncc2C(N)=O)cc(C(C)C)n14	Chemogenomic candidate	1	24	human fibroblast	1	0.125115	143	0.251748	0.748252	0.487179	0.327103	0.308411	0.364486	0.512821	0.771429	0.142857	0.171429	106.75	0.494315	0.513538	0.210808	0.275654	0.505685	0.339408	0.0326339	0.298699	1.11839	tag healthy nuclei < 50 %, tag tubulin effect > 50 %
640	Multiplex	EUB0000175a	CC(C)c1cc(Nc2nc(N3CCC[C@H](N)C3)ncc2C(N)=O)cc(C(C)C)n15	Chemogenomic candidate	10	24	HEK293T	2	-0.260137	206	0.0873786	0.912621	0.890511	0.159574	0.111702	0.728723	0.109489	0.7	0.4	0.1	322.417	0.125402	0.652444	0.053119	0.294437	0.874598	0.274867	0.112063	0.0970907	1.01358	tag healthy nuclei < 50 %, tag tubulin effect > 50 %
640	Multiplex	EUB0000175a	CC(C)c1cc(Nc2nc(N3CCC[C@H](N)C3)ncc2C(N)=O)cc(C(C)C)n16	Chemogenomic candidate	10	48	human fibroblast	1	331.17	92	0.326087	0.673913	0.95	0.241935	0.435484	0.322581	0.05	0.666667	0.133333	0.666667	110.667	0.531499	0.514801	0.276708	0.208491	0.468501	0.298464	0.0241518	0.276892	5.201	tag healthy nuclei < 50 %, tag tubulin effect > 50 %, tag membrane permeabilized > 50 %
640	Multiplex	EUB0000175a	CC(C)c1cc(Nc2nc(N3CCC[C@H](N)C3)ncc2C(N)=O)cc(C(C)C)n17	Chemogenomic candidate	1	48	U2OS	1	0.327006	249	0.0722892	0.927711	0.54023	0.450216	0.17316	0.376623	0.45977	0.942308	0.836538	0.269231	330	0.352767	0.881662	0.0538695	0.0644681	0.647233	0.102719	0.0952982	0.0225671	1.00252	tag healthy nuclei < 50 %, tag tubulin effect > 50 %, tag mitochondrial mass > 50 %
640	Multiplex	EUB0000175a	CC(C)c1cc(Nc2nc(N3CCC[C@H](N)C3)ncc2C(N)=O)cc(C(C)C)n18	Chemogenomic candidate	10	48	human fibroblast	2	-0.689143	135	0.311111	0.688889	0.806452	0.387097	0.27957	0.333333	0.193548	0.555556	0.583333	0.194444	108	0.498611	0.755765	0.214424	0.0298114	0.501389	0.304063	0.0278827	0.153127	1.11404	tag healthy nuclei < 50 %, tag tubulin effect > 50 %, tag mitochondrial mass > 50 %
640	Multiplex	EUB0000175a	CC(C)c1cc(Nc2nc(N3CCC[C@H](N)C3)ncc2C(N)=O)cc(C(C)C)n19	Chemogenomic candidate	10	48	HEK293T	2	-0.0560674	182	0.0769231	0.923077	0.928571	0.267857	0.232143	0.5	0.0714286	0.911111	0.644444	0.133333	594.833	0.0998693	0.826482	0.0664568	0.107061	0.900131	0.232673	0.0431769	0.0808889	1.00265	tag healthy nuclei < 50 %, tag tubulin effect > 50 %, tag mitochondrial mass > 50 %
640	Multiplex	EUB0000175a	CC(C)c1cc(Nc2nc(N3CCC[C@H](N)C3)ncc2C(N)=O)cc(C(C)C)n20	Chemogenomic candidate	1	12	HEK293T	1	0.247348	225	0.111111	0.888889	0.61157	0.305	0.09	0.605	0.38843	1	0.95082	0.0983607	274.667	0.427177	0.372026	0.131275	0.496699	0.572823	0.324854	0.687273	0.0469186	1.209	tag healthy nuclei < 50 %, tag tubulin effect > 50 %, tag mitochondrial mass > 50 %
640	Multiplex	EUB0000175a	CC(C)c1cc(Nc2nc(N3CCC[C@H](N)C3)ncc2C(N)=O)cc(C(C)C)n21	Chemogenomic candidate	1	24	HEK293T	2	0.353739	170	0.0529412	0.947059	0.625	0.403727	0.0993789	0.496894	0.375	0.969231	0.892308	0.0923077	322.417	0.125402	0.652444	0.053119	0.294437	0.874598	0.274867	0.112063	0.0970907	1.01358	tag healthy nuclei < 50 %, tag tubulin effect > 50 %, tag mitochondrial mass > 50 %
640	Multiplex	EUB0000175a	CC(C)c1cc(Nc2nc(N3CCC[C@H](N)C3)ncc2C(N)=O)cc(C(C)C)n22	Chemogenomic candidate	1	12	HEK293T	2	-0.0513206	140	0.0714286	0.928571	0.52809	0.261538	0.0538462	0.684615	0.47191	0.970588	0.911765	0.0882353	256.75	0.112092	0.454373	0.0637918	0.481836	0.887908	0.182057	0.132768	0.0724535	1.03765	tag healthy nuclei < 50 %, tag tubulin effect > 50 %, tag mitochondrial mass > 50 %
640	Multiplex	EUB0000175a	CC(C)c1cc(Nc2nc(N3CCC[C@H](N)C3)ncc2C(N)=O)cc(C(C)C)n23	Chemogenomic candidate	1	24	HEK293T	1	0.119478	234	0.141026	0.858974	0.653543	0.283582	0.0845771	0.631841	0.346457	0.912281	0.947368	0.0526316	293.167	0.429543	0.395461	0.147538	0.457001	0.570457	0.312274	0.510446	0.0420248	1.14297	tag healthy nuclei < 50 %, tag tubulin effect > 50 %, tag mitochondrial mass > 50 %
640	Multiplex	EUB0000175a	CC(C)c1cc(Nc2nc(N3CCC[C@H](N)C3)ncc2C(N)=O)cc(C(C)C)n24	Chemogenomic candidate	1	48	HEK293T	1	0.895788	246	0.154472	0.845528	0.721649	0.399038	0.134615	0.466346	0.278351	0.951807	0.855422	0.0240964	351.333	0.392717	0.429172	0.195155	0.375673	0.607283	0.266274	0.27356	0.0493784	0.987254	tag healthy nuclei < 50 %, tag tubulin effect > 50 %, tag mitochondrial mass > 50 %
640	Multiplex	EUB0000175a	CC(C)c1cc(Nc2nc(N3CCC[C@H](N)C3)ncc2C(N)=O)cc(C(C)C)n25	Chemogenomic candidate	10	48	HEK293T	1	-0.790797	341	0.170088	0.829912	0.712264	0.024735	0.226148	0.749117	0.287736	0.571429	1	0	351.333	0.392717	0.429172	0.195155	0.375673	0.607283	0.266274	0.27356	0.0493784	0.987254	tag healthy nuclei < 50 %, tag tubulin effect > 50 %, tag mitochondrial mass > 50 %
640	Multiplex	EUB0000175a	CC(C)c1cc(Nc2nc(N3CCC[C@H](N)C3)ncc2C(N)=O)cc(C(C)C)n26	Chemogenomic candidate	10	48	U2OS	1	-0.513985	155	0.154839	0.845161	0.894737	0.0534351	0.366412	0.580153	0.105263	1	1	1	330	0.352767	0.881662	0.0538695	0.0644681	0.647233	0.102719	0.0952982	0.0225671	1.00252	tag healthy nuclei < 50 %, tag tubulin effect > 50 %, tag mitochondrial mass > 50 %, tag membrane permeabilized > 50 %
640	Multiplex	EUB0000175a	CC(C)c1cc(Nc2nc(N3CCC[C@H](N)C3)ncc2C(N)=O)cc(C(C)C)n27	Chemogenomic candidate	10	48	U2OS	2	-0.835465	56	0.267857	0.732143	0.956522	0.097561	0.341463	0.560976	0.0434783	1	1	1	153.583	0.433939	0.864953	0.0805245	0.0545227	0.566061	0.197701	0.115167	0.0429551	1.00576	tag healthy nuclei < 50 %, tag tubulin effect > 50 %, tag mitochondrial mass > 50 %, tag membrane permeabilized > 50 %
640	Multiplex	EUB0000175a	CC(C)c1cc(Nc2nc(N3CCC[C@H](N)C3)ncc2C(N)=O)cc(C(C)C)n28	Chemogenomic candidate	10	12	U2OS	2	-0.989915	55	0.145455	0.854545	0.652174	0.319149	0.191489	0.489362	0.347826	1	0.933333	1	78.3333	0.502249	0.830741	0.0963907	0.0728682	0.497751	0.154861	0.0827165	0.0293447	1.11609	tag healthy nuclei < 50 %, tag tubulin effect > 50 %, tag mitochondrial mass > 50 %, tag membrane permeabilized > 50 %
640	Multiplex	EUB0000175a	CC(C)c1cc(Nc2nc(N3CCC[C@H](N)C3)ncc2C(N)=O)cc(C(C)C)n29	Chemogenomic candidate	10	12	human fibroblast	2	-0.989915	55	0.145455	0.854545	0.652174	0.319149	0.191489	0.489362	0.347826	1	0.933333	1	106.333	0.502249	0.830741	0.0963907	0.0728682	0.497751	0.154861	0.0827165	0.0293447	1.11609	tag healthy nuclei < 50 %, tag tubulin effect > 50 %, tag mitochondrial mass > 50 %, tag membrane permeabilized > 50 %
640	Multiplex	EUB0000175a	CC(C)c1cc(Nc2nc(N3CCC[C@H](N)C3)ncc2C(N)=O)cc(C(C)C)n30	Chemogenomic candidate	10	24	U2OS	2	-0.883603	57	0.175439	0.824561	0.84	0.234043	0.234043	0.531915	0.16	1	0.909091	1	102.167	0.521098	0.831195	0.0931875	0.0756178	0.478902	0.166245	0.0748286	0.0347485	1.01542	tag healthy nuclei < 50 %, tag tubulin effect > 50 %, tag mitochondrial mass > 50 %, tag membrane permeabilized > 50 %
640	Multiplex	EUB0000175a	CC(C)c1cc(Nc2nc(N3CCC[C@H](N)C3)ncc2C(N)=O)cc(C(C)C)n31	Chemogenomic candidate	10	24	human fibroblast	2	-0.883603	57	0.175439	0.824561	0.84	0.234043	0.234043	0.531915	0.16	1	0.909091	1	108.083	0.521098	0.831195	0.0931875	0.0756178	0.478902	0.166245	0.0748286	0.0347485	1.01542	tag healthy nuclei < 50 %, tag tubulin effect > 50 %, tag mitochondrial mass > 50 %, tag membrane permeabilized > 50 %
640	Multiplex	EUB0000175a	CC(C)c1cc(Nc2nc(N3CCC[C@H](N)C3)ncc2C(N)=O)cc(C(C)C)n32	Chemogenomic candidate	10	24	U2OS	1	-0.806003	167	0.0958084	0.904192	0.746269	0.231788	0.324503	0.443709	0.253731	0.971429	1	0.971429	212.417	0.319581	0.825187	0.0885786	0.0862345	0.680419	0.098522	0.0722682	0.0503222	0.99162	tag healthy nuclei < 50 %, tag tubulin effect > 50 %, tag mitochondrial mass > 50 %, tag membrane permeabilized > 50 %
640	Multiplex	EUB0000175a	CC(C)c1cc(Nc2nc(N3CCC[C@H](N)C3)ncc2C(N)=O)cc(C(C)C)n33	Chemogenomic candidate	10	12	U2OS	1	-0.909378	161	0.0496894	0.950311	0.649123	0.392157	0.235294	0.372549	0.350877	1	0.983333	0.883333	165.75	0.37331	0.780206	0.114105	0.10569	0.62669	0.0951184	0.0845665	0.073208	1.05123	tag healthy nuclei < 50 %, tag tubulin effect > 50 %, tag mitochondrial mass > 50 %, tag membrane permeabilized > 50 %
640	Multiplex	EUB0000175a	CC(C)c1cc(Nc2nc(N3CCC[C@H](N)C3)ncc2C(N)=O)cc(C(C)C)n34	Chemogenomic candidate	1	48	human fibroblast	2	4.35958	204	0.333333	0.666667	0.428571	0.566176	0.330882	0.102941	0.571429	0.584416	0.012987	0.0909091	108	0.498611	0.755765	0.214424	0.0298114	0.501389	0.304063	0.0278827	0.153127	1.11404	tag tubulin effect > 50 %
640	Multiplex	EUB0000175a	CC(C)c1cc(Nc2nc(N3CCC[C@H](N)C3)ncc2C(N)=O)cc(C(C)C)n35	Chemogenomic candidate	1	48	U2OS	2	-0.029955	86	0.0348837	0.965116	0.52381	0.60241	0.144578	0.253012	0.47619	0.96	0.88	0.46	153.583	0.433939	0.864953	0.0805245	0.0545227	0.566061	0.197701	0.115167	0.0429551	1.00576	tag tubulin effect > 50 %, tag mitochondrial mass > 50 %
640	Multiplex	EUB0000175a	CC(C)c1cc(Nc2nc(N3CCC[C@H](N)C3)ncc2C(N)=O)cc(C(C)C)n36	Chemogenomic candidate	1	24	U2OS	2	-0.0621024	77	0.0519481	0.948052	0.266667	0.684932	0.109589	0.205479	0.733333	0.94	0.96	0.3	102.167	0.521098	0.831195	0.0931875	0.0756178	0.478902	0.166245	0.0748286	0.0347485	1.01542	tag tubulin effect > 50 %, tag mitochondrial mass > 50 %
640	Multiplex	EUB0000175a	CC(C)c1cc(Nc2nc(N3CCC[C@H](N)C3)ncc2C(N)=O)cc(C(C)C)n37	Chemogenomic candidate	1	24	human fibroblast	2	-0.0621024	77	0.0519481	0.948052	0.266667	0.684932	0.109589	0.205479	0.733333	0.94	0.96	0.3	108.083	0.521098	0.831195	0.0931875	0.0756178	0.478902	0.166245	0.0748286	0.0347485	1.01542	tag tubulin effect > 50 %, tag mitochondrial mass > 50 %
640	Multiplex	EUB0000175a	CC(C)c1cc(Nc2nc(N3CCC[C@H](N)C3)ncc2C(N)=O)cc(C(C)C)n38	Chemogenomic candidate	1	24	U2OS	1	-0.222832	206	0.0631068	0.936893	0.571429	0.61658	0.0932642	0.290155	0.428571	0.983193	0.907563	0.226891	212.417	0.319581	0.825187	0.0885786	0.0862345	0.680419	0.098522	0.0722682	0.0503222	0.99162	tag tubulin effect > 50 %, tag mitochondrial mass > 50 %
640	Multiplex	EUB0000175a	CC(C)c1cc(Nc2nc(N3CCC[C@H](N)C3)ncc2C(N)=O)cc(C(C)C)n39	Chemogenomic candidate	1	12	U2OS	1	-0.349504	201	0.0597015	0.940299	0.511111	0.671958	0.0899471	0.238095	0.488889	1	0.897638	0.220472	165.75	0.37331	0.780206	0.114105	0.10569	0.62669	0.0951184	0.0845665	0.073208	1.05123	tag tubulin effect > 50 %, tag mitochondrial mass > 50 %
640	Multiplex	EUB0000175a	CC(C)c1cc(Nc2nc(N3CCC[C@H](N)C3)ncc2C(N)=O)cc(C(C)C)n40	Chemogenomic candidate	1	12	U2OS	2	0.403236	82	0.097561	0.902439	0.444444	0.756757	0.121622	0.121622	0.555556	0.964286	0.928571	0.160714	78.3333	0.502249	0.830741	0.0963907	0.0728682	0.497751	0.154861	0.0827165	0.0293447	1.11609	tag tubulin effect > 50 %, tag mitochondrial mass > 50 %
640	Multiplex	EUB0000175a	CC(C)c1cc(Nc2nc(N3CCC[C@H](N)C3)ncc2C(N)=O)cc(C(C)C)n41	Chemogenomic candidate	1	12	human fibroblast	2	0.403236	82	0.097561	0.902439	0.444444	0.756757	0.121622	0.121622	0.555556	0.964286	0.928571	0.160714	106.333	0.502249	0.830741	0.0963907	0.0728682	0.497751	0.154861	0.0827165	0.0293447	1.11609	tag tubulin effect > 50 %, tag mitochondrial mass > 50 %
640	Multiplex	EUB0000175a	CC(C)c1cc(Nc2nc(N3CCC[C@H](N)C3)ncc2C(N)=O)cc(C(C)C)n42	Chemogenomic candidate	1	48	HEK293T	2	0.419922	213	0.0798122	0.920188	0.666667	0.556122	0.0765306	0.367347	0.333333	0.963303	0.816514	0.0366972	594.833	0.0998693	0.826482	0.0664568	0.107061	0.900131	0.232673	0.0431769	0.0808889	1.00265	tag tubulin effect > 50 %, tag mitochondrial mass > 50 %
640	Multiplex	EUB0000175a	CC(C)c1cc(Nc2nc(N3CCC[C@H](N)C3)ncc2C(N)=O)cc(C(C)C)n43	Chemogenomic candidate	1	0	U2OS	1	0	205	0.0487805	0.95122	0.266667	0.738462	0.107692	0.153846	0.733333	0.166667	0.1875	0.0625	152.167	0.315784	0.706662	0.13121	0.162128	0.684216	0.118789	0.261243	0.0625529	0
640	Multiplex	EUB0000175a	CC(C)c1cc(Nc2nc(N3CCC[C@H](N)C3)ncc2C(N)=O)cc(C(C)C)n44	Chemogenomic candidate	1	0	human fibroblast	2	0	95	0.147368	0.852632	0.461538	0.530864	0.308642	0.160494	0.538462	0.116279	0.209302	0.0465116	101.167	0.681754	0.642258	0.240072	0.11767	0.318246	0.20189	0.247166	0.0567674	#DIV/0!
640	Multiplex	EUB0000175a	CC(C)c1cc(Nc2nc(N3CCC[C@H](N)C3)ncc2C(N)=O)cc(C(C)C)n45	Chemogenomic candidate	1	0	U2OS	2	0	71	0.084507	0.915493	0.25	0.8	0.0769231	0.123077	0.75	0.153846	0.211538	0.0384615	70.3333	0.262184	0.811025	0.0807672	0.108207	0.737816	0.0985605	0.153729	0.0272522	0
640	Multiplex	EUB0000175a	CC(C)c1cc(Nc2nc(N3CCC[C@H](N)C3)ncc2C(N)=O)cc(C(C)C)n46	Chemogenomic candidate	10	0	human fibroblast	2	0	118	0.127119	0.872881	0.444444	0.524272	0.38835	0.0873786	0.555556	0.148148	0.222222	0.037037	101.167	0.681754	0.642258	0.240072	0.11767	0.318246	0.20189	0.247166	0.0567674	#DIV/0!
640	Multiplex	EUB0000175a	CC(C)c1cc(Nc2nc(N3CCC[C@H](N)C3)ncc2C(N)=O)cc(C(C)C)n47	Chemogenomic candidate	10	0	U2OS	1	0	166	0.0421687	0.957831	0.222222	0.761006	0.125786	0.113208	0.777778	0.0661157	0.247934	0.0330579	152.167	0.315784	0.706662	0.13121	0.162128	0.684216	0.118789	0.261243	0.0625529	0
640	Multiplex	EUB0000175a	CC(C)c1cc(Nc2nc(N3CCC[C@H](N)C3)ncc2C(N)=O)cc(C(C)C)n48	Chemogenomic candidate	10	0	U2OS	2	0	57	0.0877193	0.912281	0.333333	0.788462	0.0961538	0.115385	0.666667	0.097561	0.0487805	0	70.3333	0.262184	0.811025	0.0807672	0.108207	0.737816	0.0985605	0.153729	0.0272522	0
A 987306	Multiplex	EUB0000471a	NC1=NC2=C(CCC3=C2[C@@H]2CCCC[C@@H]2O3)C(=N1)N1CCNCC1	Chemogenomic candidate	10	24	human fibroblast	1	-0.381325	240	0.45	0.55	0.578947	0.363636	0.204545	0.431818	0.421053	0.4375	0.166667	0.125	106.75	0.494315	0.513538	0.210808	0.275654	0.505685	0.339408	0.0326339	0.298699	1.11839	tag healthy nuclei < 50 %
A 987306	Multiplex	EUB0000471a	NC1=NC2=C(CCC3=C2[C@@H]2CCCC[C@@H]2O3)C(=N1)N1CCNCC1	Chemogenomic candidate	1	12	human fibroblast	1	1.54341	182	0.159341	0.840659	0.677419	0.424837	0.372549	0.202614	0.322581	0.2	0.0153846	0.107692	107.083	0.631736	0.44459	0.220734	0.334676	0.368264	0.315502	0.0769574	0.274792	1.29875	tag healthy nuclei < 50 %
A 987306	Multiplex	EUB0000471a	NC1=NC2=C(CCC3=C2[C@@H]2CCCC[C@@H]2O3)C(=N1)N1CCNCC1	Chemogenomic candidate	1	48	human fibroblast	1	-0.965001	296	0.341216	0.658784	0.714286	0.451282	0.441026	0.107692	0.285714	0.227273	0.0113636	0.102273	110.667	0.531499	0.514801	0.276708	0.208491	0.468501	0.298464	0.0241518	0.276892	5.201	tag healthy nuclei < 50 %
A 987306	Multiplex	EUB0000471a	NC1=NC2=C(CCC3=C2[C@@H]2CCCC[C@@H]2O3)C(=N1)N1CCNCC1	Chemogenomic candidate	1	0	human fibroblast	1	0	136	0.132353	0.867647	0.710526	0.40678	0.271186	0.322034	0.289474	0.25	0.291667	0.0833333	125.417	0.662404	0.310276	0.328567	0.361157	0.337596	0.203306	0.230525	0.0840641	#DIV/0!	tag healthy nuclei < 50 %
A 987306	Multiplex	EUB0000471a	NC1=NC2=C(CCC3=C2[C@@H]2CCCC[C@@H]2O3)C(=N1)N1CCNCC1	Chemogenomic candidate	1	12	HEK293T	2	1.23148	217	0.0414747	0.958525	0.214286	0.413462	0.0480769	0.538462	0.785714	0.255814	0.337209	0.0697674	256.75	0.112092	0.454373	0.0637918	0.481836	0.887908	0.182057	0.132768	0.0724535	1.03765	tag healthy nuclei < 50 %
A 987306	Multiplex	EUB0000471a	NC1=NC2=C(CCC3=C2[C@@H]2CCCC[C@@H]2O3)C(=N1)N1CCNCC1	Chemogenomic candidate	10	0	human fibroblast	1	0	166	0.120482	0.879518	0.628571	0.417808	0.342466	0.239726	0.371429	0.213115	0.327869	0.0491803	125.417	0.662404	0.310276	0.328567	0.361157	0.337596	0.203306	0.230525	0.0840641	#DIV/0!	tag healthy nuclei < 50 %
A 987306	Multiplex	EUB0000471a	NC1=NC2=C(CCC3=C2[C@@H]2CCCC[C@@H]2O3)C(=N1)N1CCNCC1	Chemogenomic candidate	10	0	HEK293T	2	0	190	0.0526316	0.947368	0.119403	0.211111	0.0444444	0.744444	0.880597	0.0263158	0.236842	0	233.167	0.0929753	0.24237	0.0798532	0.677777	0.907025	0.0412417	0.171457	0.0110984	#DIV/0!	tag healthy nuclei < 50 %
A 987306	Multiplex	EUB0000471a	NC1=NC2=C(CCC3=C2[C@@H]2CCCC[C@@H]2O3)C(=N1)N1CCNCC1	Chemogenomic candidate	1	0	HEK293T	2	0	183	0.0491803	0.95082	0.0944882	0.206897	0.0632184	0.729885	0.905512	0	0.138889	0	233.167	0.0929753	0.24237	0.0798532	0.677777	0.907025	0.0412417	0.171457	0.0110984	#DIV/0!	tag healthy nuclei < 50 %
A 987306	Multiplex	EUB0000471a	NC1=NC2=C(CCC3=C2[C@@H]2CCCC[C@@H]2O3)C(=N1)N1CCNCC1	Chemogenomic candidate	1	12	HEK293T	1	1.35286	236	0.101695	0.898305	0.342593	0.415094	0.0754717	0.509434	0.657407	0.488636	0.829545	0.0340909	274.667	0.427177	0.372026	0.131275	0.496699	0.572823	0.324854	0.687273	0.0469186	1.209	tag healthy nuclei < 50 %, tag mitochondrial mass > 50 %
A 987306	Multiplex	EUB0000471a	NC1=NC2=C(CCC3=C2[C@@H]2CCCC[C@@H]2O3)C(=N1)N1CCNCC1	Chemogenomic candidate	1	0	HEK293T	1	0	236	0.165254	0.834746	0.251908	0.22335	0.111675	0.664975	0.748092	0.0454545	0.772727	0	256.5	0.333294	0.212413	0.0958204	0.691766	0.666706	0.0141172	0.774309	0.00115741	#DIV/0!	tag healthy nuclei < 50 %, tag mitochondrial mass > 50 %
A 987306	Multiplex	EUB0000471a	NC1=NC2=C(CCC3=C2[C@@H]2CCCC[C@@H]2O3)C(=N1)N1CCNCC1	Chemogenomic candidate	10	0	HEK293T	1	0	247	0.101215	0.898785	0.273333	0.279279	0.045045	0.675676	0.726667	0.0483871	0.758065	0	256.5	0.333294	0.212413	0.0958204	0.691766	0.666706	0.0141172	0.774309	0.00115741	#DIV/0!	tag healthy nuclei < 50 %, tag mitochondrial mass > 50 %
A 987306	Multiplex	EUB0000471a	NC1=NC2=C(CCC3=C2[C@@H]2CCCC[C@@H]2O3)C(=N1)N1CCNCC1	Chemogenomic candidate	10	48	human fibroblast	2	2.39159	215	0.47907	0.52093	0.384615	0.491071	0.276786	0.232143	0.615385	0.527273	0.109091	0.0909091	108	0.498611	0.755765	0.214424	0.0298114	0.501389	0.304063	0.0278827	0.153127	1.11404	tag healthy nuclei < 50 %, tag tubulin effect > 50 %
A 987306	Multiplex	EUB0000471a	NC1=NC2=C(CCC3=C2[C@@H]2CCCC[C@@H]2O3)C(=N1)N1CCNCC1	Chemogenomic candidate	10	12	human fibroblast	1	-0.634269	220	0.422727	0.577273	0.563636	0.346457	0.220472	0.433071	0.436364	0.522727	0.136364	0.0454545	107.083	0.631736	0.44459	0.220734	0.334676	0.368264	0.315502	0.0769574	0.274792	1.29875	tag healthy nuclei < 50 %, tag tubulin effect > 50 %
A 987306	Multiplex	EUB0000471a	NC1=NC2=C(CCC3=C2[C@@H]2CCCC[C@@H]2O3)C(=N1)N1CCNCC1	Chemogenomic candidate	10	24	U2OS	2	-0.414725	109	0.0275229	0.972477	0.333333	0.462264	0.0849057	0.45283	0.666667	0.693878	0.795918	0.22449	102.167	0.521098	0.831195	0.0931875	0.0756178	0.478902	0.166245	0.0748286	0.0347485	1.01542	tag healthy nuclei < 50 %, tag tubulin effect > 50 %, tag mitochondrial mass > 50 %
A 987306	Multiplex	EUB0000471a	NC1=NC2=C(CCC3=C2[C@@H]2CCCC[C@@H]2O3)C(=N1)N1CCNCC1	Chemogenomic candidate	10	24	human fibroblast	2	-0.414725	109	0.0275229	0.972477	0.333333	0.462264	0.0849057	0.45283	0.666667	0.693878	0.795918	0.22449	108.083	0.521098	0.831195	0.0931875	0.0756178	0.478902	0.166245	0.0748286	0.0347485	1.01542	tag healthy nuclei < 50 %, tag tubulin effect > 50 %, tag mitochondrial mass > 50 %
A 987306	Multiplex	EUB0000471a	NC1=NC2=C(CCC3=C2[C@@H]2CCCC[C@@H]2O3)C(=N1)N1CCNCC1	Chemogenomic candidate	10	48	U2OS	2	-0.249047	133	0.12782	0.87218	0.482759	0.405172	0.0948276	0.5	0.517241	0.531915	0.787234	0.212766	153.583	0.433939	0.864953	0.0805245	0.0545227	0.566061	0.197701	0.115167	0.0429551	1.00576	tag healthy nuclei < 50 %, tag tubulin effect > 50 %, tag mitochondrial mass > 50 %
A 987306	Multiplex	EUB0000471a	NC1=NC2=C(CCC3=C2[C@@H]2CCCC[C@@H]2O3)C(=N1)N1CCNCC1	Chemogenomic candidate	10	24	U2OS	1	-0.41494	140	0.142857	0.857143	0.403846	0.45	0.116667	0.433333	0.596154	0.759259	0.851852	0.166667	212.417	0.319581	0.825187	0.0885786	0.0862345	0.680419	0.098522	0.0722682	0.0503222	0.99162	tag healthy nuclei < 50 %, tag tubulin effect > 50 %, tag mitochondrial mass > 50 %
A 987306	Multiplex	EUB0000471a	NC1=NC2=C(CCC3=C2[C@@H]2CCCC[C@@H]2O3)C(=N1)N1CCNCC1	Chemogenomic candidate	10	48	U2OS	1	-0.147466	175	0.188571	0.811429	0.623188	0.323944	0.190141	0.485915	0.376812	0.630435	0.76087	0.0869565	330	0.352767	0.881662	0.0538695	0.0644681	0.647233	0.102719	0.0952982	0.0225671	1.00252	tag healthy nuclei < 50 %, tag tubulin effect > 50 %, tag mitochondrial mass > 50 %
A 987306	Multiplex	EUB0000471a	NC1=NC2=C(CCC3=C2[C@@H]2CCCC[C@@H]2O3)C(=N1)N1CCNCC1	Chemogenomic candidate	10	12	HEK293T	1	0.100472	238	0.159664	0.840336	0.764706	0.335	0.07	0.595	0.235294	0.985075	0.970149	0.0447761	274.667	0.427177	0.372026	0.131275	0.496699	0.572823	0.324854	0.687273	0.0469186	1.209	tag healthy nuclei < 50 %, tag tubulin effect > 50 %, tag mitochondrial mass > 50 %
A 987306	Multiplex	EUB0000471a	NC1=NC2=C(CCC3=C2[C@@H]2CCCC[C@@H]2O3)C(=N1)N1CCNCC1	Chemogenomic candidate	10	24	HEK293T	2	0.347545	190	0.163158	0.836842	0.813953	0.427673	0.0314465	0.540881	0.186047	1	1	0.0294118	322.417	0.125402	0.652444	0.053119	0.294437	0.874598	0.274867	0.112063	0.0970907	1.01358	tag healthy nuclei < 50 %, tag tubulin effect > 50 %, tag mitochondrial mass > 50 %
A 987306	Multiplex	EUB0000471a	NC1=NC2=C(CCC3=C2[C@@H]2CCCC[C@@H]2O3)C(=N1)N1CCNCC1	Chemogenomic candidate	10	12	HEK293T	2	0.546882	200	0.075	0.925	0.587719	0.32973	0.0540541	0.616216	0.412281	0.95082	0.885246	0.0163934	256.75	0.112092	0.454373	0.0637918	0.481836	0.887908	0.182057	0.132768	0.0724535	1.03765	tag healthy nuclei < 50 %, tag tubulin effect > 50 %, tag mitochondrial mass > 50 %
A 987306	Multiplex	EUB0000471a	NC1=NC2=C(CCC3=C2[C@@H]2CCCC[C@@H]2O3)C(=N1)N1CCNCC1	Chemogenomic candidate	10	48	HEK293T	1	0.700235	288	0.454861	0.545139	0.66129	0.484076	0.121019	0.394904	0.33871	0.960526	0.934211	0.0131579	351.333	0.392717	0.429172	0.195155	0.375673	0.607283	0.266274	0.27356	0.0493784	0.987254	tag healthy nuclei < 50 %, tag tubulin effect > 50 %, tag mitochondrial mass > 50 %
A 987306	Multiplex	EUB0000471a	NC1=NC2=C(CCC3=C2[C@@H]2CCCC[C@@H]2O3)C(=N1)N1CCNCC1	Chemogenomic candidate	10	24	HEK293T	1	0.147447	241	0.278008	0.721992	0.808989	0.408046	0.0804598	0.511494	0.191011	0.957746	1	0	293.167	0.429543	0.395461	0.147538	0.457001	0.570457	0.312274	0.510446	0.0420248	1.14297	tag healthy nuclei < 50 %, tag tubulin effect > 50 %, tag mitochondrial mass > 50 %
A 987306	Multiplex	EUB0000471a	NC1=NC2=C(CCC3=C2[C@@H]2CCCC[C@@H]2O3)C(=N1)N1CCNCC1	Chemogenomic candidate	1	24	HEK293T	1	2.63559	298	0.107383	0.892617	0.493506	0.590226	0.120301	0.289474	0.506494	0.471338	0.700637	0.0127389	293.167	0.429543	0.395461	0.147538	0.457001	0.570457	0.312274	0.510446	0.0420248	1.14297	tag mitochondrial mass > 50 %
A 987306	Multiplex	EUB0000471a	NC1=NC2=C(CCC3=C2[C@@H]2CCCC[C@@H]2O3)C(=N1)N1CCNCC1	Chemogenomic candidate	10	48	human fibroblast	1	-0.914894	244	0.495902	0.504098	0.416667	0.504065	0.203252	0.292683	0.583333	0.580645	0.112903	0.0645161	110.667	0.531499	0.514801	0.276708	0.208491	0.468501	0.298464	0.0241518	0.276892	5.201	tag tubulin effect > 50 %
A 987306	Multiplex	EUB0000471a	NC1=NC2=C(CCC3=C2[C@@H]2CCCC[C@@H]2O3)C(=N1)N1CCNCC1	Chemogenomic candidate	10	12	U2OS	2	0.141696	106	0.0377358	0.962264	0.272727	0.686275	0.0980392	0.215686	0.727273	0.928571	0.871429	0.257143	78.3333	0.502249	0.830741	0.0963907	0.0728682	0.497751	0.154861	0.0827165	0.0293447	1.11609	tag tubulin effect > 50 %, tag mitochondrial mass > 50 %
A 987306	Multiplex	EUB0000471a	NC1=NC2=C(CCC3=C2[C@@H]2CCCC[C@@H]2O3)C(=N1)N1CCNCC1	Chemogenomic candidate	10	12	human fibroblast	2	0.141696	106	0.0377358	0.962264	0.272727	0.686275	0.0980392	0.215686	0.727273	0.928571	0.871429	0.257143	106.333	0.502249	0.830741	0.0963907	0.0728682	0.497751	0.154861	0.0827165	0.0293447	1.11609	tag tubulin effect > 50 %, tag mitochondrial mass > 50 %
A 987306	Multiplex	EUB0000471a	NC1=NC2=C(CCC3=C2[C@@H]2CCCC[C@@H]2O3)C(=N1)N1CCNCC1	Chemogenomic candidate	10	12	U2OS	1	-0.195955	135	0.0962963	0.903704	0.266667	0.622951	0.131148	0.245902	0.733333	0.934211	0.881579	0.118421	165.75	0.37331	0.780206	0.114105	0.10569	0.62669	0.0951184	0.0845665	0.073208	1.05123	tag tubulin effect > 50 %, tag mitochondrial mass > 50 %
A 987306	Multiplex	EUB0000471a	NC1=NC2=C(CCC3=C2[C@@H]2CCCC[C@@H]2O3)C(=N1)N1CCNCC1	Chemogenomic candidate	10	48	HEK293T	2	0.23482	217	0.37788	0.62212	0.745098	0.548148	0.0740741	0.377778	0.254902	0.918919	0.905405	0.027027	594.833	0.0998693	0.826482	0.0664568	0.107061	0.900131	0.232673	0.0431769	0.0808889	1.00265	tag tubulin effect > 50 %, tag mitochondrial mass > 50 %
A 987306	Multiplex	EUB0000471a	NC1=NC2=C(CCC3=C2[C@@H]2CCCC[C@@H]2O3)C(=N1)N1CCNCC1	Chemogenomic candidate	1	24	human fibroblast	1	1.51094	198	0.242424	0.757576	0.551724	0.506667	0.3	0.193333	0.448276	0.473684	0.0263158	0.210526	106.75	0.494315	0.513538	0.210808	0.275654	0.505685	0.339408	0.0326339	0.298699	1.11839
A 987306	Multiplex	EUB0000471a	NC1=NC2=C(CCC3=C2[C@@H]2CCCC[C@@H]2O3)C(=N1)N1CCNCC1	Chemogenomic candidate	1	48	human fibroblast	2	4.31671	204	0.348039	0.651961	0.416667	0.56391	0.345865	0.0902256	0.583333	0.36	0.0266667	0.133333	108	0.498611	0.755765	0.214424	0.0298114	0.501389	0.304063	0.0278827	0.153127	1.11404
A 987306	Multiplex	EUB0000471a	NC1=NC2=C(CCC3=C2[C@@H]2CCCC[C@@H]2O3)C(=N1)N1CCNCC1	Chemogenomic candidate	10	0	U2OS	1	0	119	0.10084	0.89916	0.294118	0.757009	0.0841121	0.158879	0.705882	0.17284	0.283951	0.0987654	152.167	0.315784	0.706662	0.13121	0.162128	0.684216	0.118789	0.261243	0.0625529	0
A 987306	Multiplex	EUB0000471a	NC1=NC2=C(CCC3=C2[C@@H]2CCCC[C@@H]2O3)C(=N1)N1CCNCC1	Chemogenomic candidate	1	48	HEK293T	2	0.97258	420	0.0452381	0.954762	0.12069	0.76808	0.0872818	0.144638	0.87931	0.357143	0.123377	0.0941558	594.833	0.0998693	0.826482	0.0664568	0.107061	0.900131	0.232673	0.0431769	0.0808889	1.00265
A 987306	Multiplex	EUB0000471a	NC1=NC2=C(CCC3=C2[C@@H]2CCCC[C@@H]2O3)C(=N1)N1CCNCC1	Chemogenomic candidate	1	12	U2OS	2	-0.21389	71	0.15493	0.84507	0	0.616667	0.2	0.183333	1	0.216216	0.27027	0.0810811	78.3333	0.502249	0.830741	0.0963907	0.0728682	0.497751	0.154861	0.0827165	0.0293447	1.11609
A 987306	Multiplex	EUB0000471a	NC1=NC2=C(CCC3=C2[C@@H]2CCCC[C@@H]2O3)C(=N1)N1CCNCC1	Chemogenomic candidate	1	12	human fibroblast	2	-0.21389	71	0.15493	0.84507	0	0.616667	0.2	0.183333	1	0.216216	0.27027	0.0810811	106.333	0.502249	0.830741	0.0963907	0.0728682	0.497751	0.154861	0.0827165	0.0293447	1.11609
A 987306	Multiplex	EUB0000471a	NC1=NC2=C(CCC3=C2[C@@H]2CCCC[C@@H]2O3)C(=N1)N1CCNCC1	Chemogenomic candidate	1	0	U2OS	1	0	167	0.0838323	0.916168	0.24	0.745098	0.0915033	0.163399	0.76	0.114035	0.210526	0.0789474	152.167	0.315784	0.706662	0.13121	0.162128	0.684216	0.118789	0.261243	0.0625529	0
A 987306	Multiplex	EUB0000471a	NC1=NC2=C(CCC3=C2[C@@H]2CCCC[C@@H]2O3)C(=N1)N1CCNCC1	Chemogenomic candidate	1	24	U2OS	1	0.141467	203	0.0492611	0.950739	0.394737	0.65285	0.150259	0.196891	0.605263	0.0396825	0.047619	0.0714286	212.417	0.319581	0.825187	0.0885786	0.0862345	0.680419	0.098522	0.0722682	0.0503222	0.99162
A 987306	Multiplex	EUB0000471a	NC1=NC2=C(CCC3=C2[C@@H]2CCCC[C@@H]2O3)C(=N1)N1CCNCC1	Chemogenomic candidate	1	24	U2OS	2	0.173054	82	0.0853659	0.914634	0.2	0.573333	0.226667	0.2	0.8	0.162791	0.209302	0.0697674	102.167	0.521098	0.831195	0.0931875	0.0756178	0.478902	0.166245	0.0748286	0.0347485	1.01542
A 987306	Multiplex	EUB0000471a	NC1=NC2=C(CCC3=C2[C@@H]2CCCC[C@@H]2O3)C(=N1)N1CCNCC1	Chemogenomic candidate	1	24	human fibroblast	2	0.173054	82	0.0853659	0.914634	0.2	0.573333	0.226667	0.2	0.8	0.162791	0.209302	0.0697674	108.083	0.521098	0.831195	0.0931875	0.0756178	0.478902	0.166245	0.0748286	0.0347485	1.01542
A 987306	Multiplex	EUB0000471a	NC1=NC2=C(CCC3=C2[C@@H]2CCCC[C@@H]2O3)C(=N1)N1CCNCC1	Chemogenomic candidate	1	12	U2OS	1	-0.293429	167	0.0718563	0.928144	0.344828	0.664516	0.148387	0.187097	0.655172	0.0776699	0.0970874	0.0485437	165.75	0.37331	0.780206	0.114105	0.10569	0.62669	0.0951184	0.0845665	0.073208	1.05123
A 987306	Multiplex	EUB0000471a	NC1=NC2=C(CCC3=C2[C@@H]2CCCC[C@@H]2O3)C(=N1)N1CCNCC1	Chemogenomic candidate	1	48	U2OS	2	0.521364	113	0.0973451	0.902655	0.4	0.656863	0.196078	0.147059	0.6	0.134328	0.179104	0.0447761	153.583	0.433939	0.864953	0.0805245	0.0545227	0.566061	0.197701	0.115167	0.0429551	1.00576
A 987306	Multiplex	EUB0000471a	NC1=NC2=C(CCC3=C2[C@@H]2CCCC[C@@H]2O3)C(=N1)N1CCNCC1	Chemogenomic candidate	1	48	U2OS	1	1.03372	299	0.0501672	0.949833	0.315789	0.78169	0.084507	0.133803	0.684211	0.0540541	0.0540541	0.0315315	330	0.352767	0.881662	0.0538695	0.0644681	0.647233	0.102719	0.0952982	0.0225671	1.00252
A 987306	Multiplex	EUB0000471a	NC1=NC2=C(CCC3=C2[C@@H]2CCCC[C@@H]2O3)C(=N1)N1CCNCC1	Chemogenomic candidate	10	0	U2OS	2	0	95	0.0631579	0.936842	0.272727	0.764045	0.11236	0.123596	0.727273	0.117647	0.161765	0.0294118	70.3333	0.262184	0.811025	0.0807672	0.108207	0.737816	0.0985605	0.153729	0.0272522	0
A 987306	Multiplex	EUB0000471a	NC1=NC2=C(CCC3=C2[C@@H]2CCCC[C@@H]2O3)C(=N1)N1CCNCC1	Chemogenomic candidate	10	0	human fibroblast	2	0	85	0.164706	0.835294	0.833333	0.507042	0.323944	0.169014	0.166667	0.138889	0.305556	0.0277778	101.167	0.681754	0.642258	0.240072	0.11767	0.318246	0.20189	0.247166	0.0567674	#DIV/0!
A 987306	Multiplex	EUB0000471a	NC1=NC2=C(CCC3=C2[C@@H]2CCCC[C@@H]2O3)C(=N1)N1CCNCC1	Chemogenomic candidate	1	24	HEK293T	2	1.08533	264	0.0340909	0.965909	0.180723	0.592157	0.0823529	0.32549	0.819277	0.298013	0.291391	0.0264901	322.417	0.125402	0.652444	0.053119	0.294437	0.874598	0.274867	0.112063	0.0970907	1.01358
A 987306	Multiplex	EUB0000471a	NC1=NC2=C(CCC3=C2[C@@H]2CCCC[C@@H]2O3)C(=N1)N1CCNCC1	Chemogenomic candidate	1	48	HEK293T	1	5.26021	532	0.0714286	0.928571	0.362069	0.799595	0.082996	0.117409	0.637931	0.263291	0.250633	0.0126582	351.333	0.392717	0.429172	0.195155	0.375673	0.607283	0.266274	0.27356	0.0493784	0.987254
A 987306	Multiplex	EUB0000471a	NC1=NC2=C(CCC3=C2[C@@H]2CCCC[C@@H]2O3)C(=N1)N1CCNCC1	Chemogenomic candidate	1	0	U2OS	2	0	54	0.111111	0.888889	0	0.8125	0.104167	0.0833333	1	0.128205	0.205128	0	70.3333	0.262184	0.811025	0.0807672	0.108207	0.737816	0.0985605	0.153729	0.0272522	0
A 987306	Multiplex	EUB0000471a	NC1=NC2=C(CCC3=C2[C@@H]2CCCC[C@@H]2O3)C(=N1)N1CCNCC1	Chemogenomic candidate	1	0	human fibroblast	2	0	77	0.0779221	0.922078	0.7	0.591549	0.267606	0.140845	0.3	0.047619	0.190476	0	101.167	0.681754	0.642258	0.240072	0.11767	0.318246	0.20189	0.247166	0.0567674	#DIV/0!
A-108	Multiplex	EUB0000736a	CN1C=NC=C1[C@@](COC2=C(C3=CC=C(OC(F)(F)F)C=C3)C=C(C#N)C=C2)(C4=CC=C(C#N)C=C4)O	Chemogenomic candidate	10	0	human fibroblast	2	0	101	0.336634	0.663366	0.2	0.313433	0.61194	0.0746269	0.8	0.190476	0.285714	0.0952381	99.3333	0.557903	0.293865	0.595118	0.111016	0.442097	0.112114	0.290215	0.0427216	#DIV/0!	tag healthy nuclei < 50 %
A-108	Multiplex	EUB0000736a	CN1C=NC=C1[C@@](COC2=C(C3=CC=C(OC(F)(F)F)C=C3)C=C(C#N)C=C2)(C4=CC=C(C#N)C=C4)O	Chemogenomic candidate	10	0	human fibroblast	2	0	99	0.565657	0.434343	0.8	0.348837	0.534884	0.116279	0.2	0.133333	0.2	0.0666667	99.3333	0.557903	0.293865	0.595118	0.111016	0.442097	0.112114	0.290215	0.0427216	#DIV/0!	tag healthy nuclei < 50 %
A-108	Multiplex	EUB0000736a	CN1C=NC=C1[C@@](COC2=C(C3=CC=C(OC(F)(F)F)C=C3)C=C(C#N)C=C2)(C4=CC=C(C#N)C=C4)O	Chemogenomic candidate	10	0	HEK293T	1	0	870	0.221494	0.778506	0.121951	0.451178	0.272727	0.276094	0.878049	0.0223881	0.0858209	0.0335821	865.667	0.13691	0.491163	0.230041	0.278796	0.86309	0.0185405	0.129798	0.0320833	#DIV/0!	tag healthy nuclei < 50 %
A-108	Multiplex	EUB0000736a	CN1C=NC=C1[C@@](COC2=C(C3=CC=C(OC(F)(F)F)C=C3)C=C(C#N)C=C2)(C4=CC=C(C#N)C=C4)O	Chemogenomic candidate	10	12	human fibroblast	2	114.808	82	0.329268	0.670732	0.428571	0.345455	0.527273	0.127273	0.571429	0.263158	0.105263	0	84.3333	0.520833	0.311795	0.58592	0.102285	0.479167	0.125354	0.149616	0.0949875	7.64557e+11	tag healthy nuclei < 50 %
A-108	Multiplex	EUB0000736a	CN1C=NC=C1[C@@](COC2=C(C3=CC=C(OC(F)(F)F)C=C3)C=C(C#N)C=C2)(C4=CC=C(C#N)C=C4)O	Chemogenomic candidate	10	24	human fibroblast	2	2.59116e+07	88	0.295455	0.704545	0.5	0.435484	0.5	0.0645161	0.5	0.37037	0.666667	0.148148	80.0833	0.552381	0.346171	0.555718	0.0981105	0.447619	0.11087	0.120814	0.103	231110	tag healthy nuclei < 50 %, tag mitochondrial mass > 50 %
A-108	Multiplex	EUB0000736a	CN1C=NC=C1[C@@](COC2=C(C3=CC=C(OC(F)(F)F)C=C3)C=C(C#N)C=C2)(C4=CC=C(C#N)C=C4)O	Chemogenomic candidate	10	12	human fibroblast	1	0.191292	192	0.151042	0.848958	0.538462	0.447853	0.392638	0.159509	0.461538	0.671233	0.205479	0.232877	230.667	0.695283	0.596796	0.258529	0.144676	0.304717	0.0342007	0.0357415	0.0583164	1.23771	tag healthy nuclei < 50 %, tag tubulin effect > 50 %
A-108	Multiplex	EUB0000736a	CN1C=NC=C1[C@@](COC2=C(C3=CC=C(OC(F)(F)F)C=C3)C=C(C#N)C=C2)(C4=CC=C(C#N)C=C4)O	Chemogenomic candidate	10	24	human fibroblast	2	157.14	85	0.211765	0.788235	0.625	0.373134	0.507463	0.119403	0.375	0.52	0.28	0.16	80.0833	0.552381	0.346171	0.555718	0.0981105	0.447619	0.11087	0.120814	0.103	231110	tag healthy nuclei < 50 %, tag tubulin effect > 50 %
A-108	Multiplex	EUB0000736a	CN1C=NC=C1[C@@](COC2=C(C3=CC=C(OC(F)(F)F)C=C3)C=C(C#N)C=C2)(C4=CC=C(C#N)C=C4)O	Chemogenomic candidate	10	24	human fibroblast	1	1.29796	216	0.115741	0.884259	0.545455	0.47644	0.408377	0.115183	0.454545	0.615385	0.428571	0.032967	242.833	0.651394	0.612787	0.255064	0.132149	0.348606	0.025027	0.0173706	0.0467803	1.19614	tag healthy nuclei < 50 %, tag tubulin effect > 50 %
A-108	Multiplex	EUB0000736a	CN1C=NC=C1[C@@](COC2=C(C3=CC=C(OC(F)(F)F)C=C3)C=C(C#N)C=C2)(C4=CC=C(C#N)C=C4)O	Chemogenomic candidate	10	12	human fibroblast	2	-0.997375	94	0.329787	0.670213	0.571429	0.269841	0.619048	0.111111	0.428571	0.529412	0.764706	0.0588235	84.3333	0.520833	0.311795	0.58592	0.102285	0.479167	0.125354	0.149616	0.0949875	7.64557e+11	tag healthy nuclei < 50 %, tag tubulin effect > 50 %, tag mitochondrial mass > 50 %
A-108	Multiplex	EUB0000736a	CN1C=NC=C1[C@@](COC2=C(C3=CC=C(OC(F)(F)F)C=C3)C=C(C#N)C=C2)(C4=CC=C(C#N)C=C4)O	Chemogenomic candidate	10	12	U2OS	1	-0.419308	188	0.0319149	0.968085	0.387097	0.703297	0.126374	0.17033	0.612903	0.96875	0.421875	0.3125	199.167	0.369403	0.889153	0.0559111	0.0549359	0.630597	0.260916	0.219385	0.107163	1.00798	tag tubulin effect > 50 %
A-108	Multiplex	EUB0000736a	CN1C=NC=C1[C@@](COC2=C(C3=CC=C(OC(F)(F)F)C=C3)C=C(C#N)C=C2)(C4=CC=C(C#N)C=C4)O	Chemogenomic candidate	10	24	U2OS	1	-0.139529	190	0.0263158	0.973684	0.71875	0.740541	0.0864865	0.172973	0.28125	0.664234	0.379562	0.29927	276.667	0.370298	0.917275	0.0423433	0.0403816	0.629702	0.31212	0.21103	0.0682442	1.0014	tag tubulin effect > 50 %
A-108	Multiplex	EUB0000736a	CN1C=NC=C1[C@@](COC2=C(C3=CC=C(OC(F)(F)F)C=C3)C=C(C#N)C=C2)(C4=CC=C(C#N)C=C4)O	Chemogenomic candidate	10	24	HEK293T	2	0.0708922	1251	0.0479616	0.952038	0.0890688	0.739715	0.0528967	0.207389	0.910931	0.977299	0.093076	0.641317	3025.33	0.160951	0.737455	0.183731	0.0788139	0.839049	0.452063	0.229554	0.0699568	0.474195	tag tubulin effect > 50 %, tag membrane permeabilized > 50 %
A-108	Multiplex	EUB0000736a	CN1C=NC=C1[C@@](COC2=C(C3=CC=C(OC(F)(F)F)C=C3)C=C(C#N)C=C2)(C4=CC=C(C#N)C=C4)O	Chemogenomic candidate	10	24	HEK293T	1	-0.254013	759	0.106719	0.893281	0.25	0.60767	0.103245	0.289086	0.75	0.953883	0.092233	0.618932	838.25	0.154355	0.792279	0.137252	0.0704688	0.845645	0.0333863	0.0308318	0.0797788	1.0151	tag tubulin effect > 50 %, tag membrane permeabilized > 50 %
A-108	Multiplex	EUB0000736a	CN1C=NC=C1[C@@](COC2=C(C3=CC=C(OC(F)(F)F)C=C3)C=C(C#N)C=C2)(C4=CC=C(C#N)C=C4)O	Chemogenomic candidate	10	12	HEK293T	1	-0.634686	827	0.116082	0.883918	0.231061	0.519836	0.119015	0.361149	0.768939	0.939474	0.0842105	0.597368	691.5	0.185934	0.698273	0.149796	0.151931	0.814066	0.0267306	0.0412745	0.044192	1.10218	tag tubulin effect > 50 %, tag membrane permeabilized > 50 %
A-108	Multiplex	EUB0000736a	CN1C=NC=C1[C@@](COC2=C(C3=CC=C(OC(F)(F)F)C=C3)C=C(C#N)C=C2)(C4=CC=C(C#N)C=C4)O	Chemogenomic candidate	10	12	HEK293T	2	0.13185	1209	0.0421836	0.957816	0.123348	0.773748	0.0302245	0.196028	0.876652	0.96317	0.191964	0.572545	1765.83	0.0828653	0.866876	0.0909282	0.0421957	0.917135	0.0464362	0.0760075	0.0151675	0.999314	tag tubulin effect > 50 %, tag membrane permeabilized > 50 %
A-108	Multiplex	EUB0000736a	CN1C=NC=C1[C@@](COC2=C(C3=CC=C(OC(F)(F)F)C=C3)C=C(C#N)C=C2)(C4=CC=C(C#N)C=C4)O	Chemogenomic candidate	10	24	U2OS	2	-0.192361	88	0.0795455	0.920455	0.809524	0.555556	0.185185	0.259259	0.190476	0.733333	0.755556	0.355556	178.5	0.310463	0.888541	0.0624047	0.049054	0.689537	0.288716	0.291394	0.0647451	1.00514	tag tubulin effect > 50 %, tag mitochondrial mass > 50 %
A-108	Multiplex	EUB0000736a	CN1C=NC=C1[C@@](COC2=C(C3=CC=C(OC(F)(F)F)C=C3)C=C(C#N)C=C2)(C4=CC=C(C#N)C=C4)O	Chemogenomic candidate	10	12	U2OS	2	-0.197555	101	0.19802	0.80198	0.4375	0.604938	0.197531	0.197531	0.5625	0.918367	0.632653	0.285714	139.167	0.248909	0.881032	0.0702926	0.0486752	0.751091	0.279715	0.240817	0.0972624	1.01342	tag tubulin effect > 50 %, tag mitochondrial mass > 50 %
A-108	Multiplex	EUB0000736a	CN1C=NC=C1[C@@](COC2=C(C3=CC=C(OC(F)(F)F)C=C3)C=C(C#N)C=C2)(C4=CC=C(C#N)C=C4)O	Chemogenomic candidate	10	12	U2OS	1	0.696856	136	0.0367647	0.963235	0.533333	0.847328	0.0381679	0.114504	0.466667	0.252252	0.252252	0.171171	199.167	0.369403	0.889153	0.0559111	0.0549359	0.630597	0.260916	0.219385	0.107163	1.00798
A-108	Multiplex	EUB0000736a	CN1C=NC=C1[C@@](COC2=C(C3=CC=C(OC(F)(F)F)C=C3)C=C(C#N)C=C2)(C4=CC=C(C#N)C=C4)O	Chemogenomic candidate	10	24	U2OS	1	0.760799	184	0.0434783	0.956522	0.222222	0.863636	0.0340909	0.102273	0.777778	0.217105	0.203947	0.111842	276.667	0.370298	0.917275	0.0423433	0.0403816	0.629702	0.31212	0.21103	0.0682442	1.0014
A-108	Multiplex	EUB0000736a	CN1C=NC=C1[C@@](COC2=C(C3=CC=C(OC(F)(F)F)C=C3)C=C(C#N)C=C2)(C4=CC=C(C#N)C=C4)O	Chemogenomic candidate	10	24	HEK293T	1	0.821899	650	0.104615	0.895385	0.12963	0.780069	0.127148	0.0927835	0.87037	0.162996	0.0462555	0.10793	838.25	0.154355	0.792279	0.137252	0.0704688	0.845645	0.0333863	0.0308318	0.0797788	1.0151
A-108	Multiplex	EUB0000736a	CN1C=NC=C1[C@@](COC2=C(C3=CC=C(OC(F)(F)F)C=C3)C=C(C#N)C=C2)(C4=CC=C(C#N)C=C4)O	Chemogenomic candidate	10	0	U2OS	1	0	179	0.0223464	0.977654	0.333333	0.897143	0.0685714	0.0342857	0.666667	0.216561	0.127389	0.0955414	156.5	0.597808	0.882455	0.0611652	0.0563801	0.402192	0.271242	0.126392	0.10096	0
A-108	Multiplex	EUB0000736a	CN1C=NC=C1[C@@](COC2=C(C3=CC=C(OC(F)(F)F)C=C3)C=C(C#N)C=C2)(C4=CC=C(C#N)C=C4)O	Chemogenomic candidate	10	24	U2OS	2	0.786447	199	0.0452261	0.954774	0.454545	0.857895	0.0842105	0.0578947	0.545455	0.257669	0.288344	0.0920245	178.5	0.310463	0.888541	0.0624047	0.049054	0.689537	0.288716	0.291394	0.0647451	1.00514
A-108	Multiplex	EUB0000736a	CN1C=NC=C1[C@@](COC2=C(C3=CC=C(OC(F)(F)F)C=C3)C=C(C#N)C=C2)(C4=CC=C(C#N)C=C4)O	Chemogenomic candidate	10	0	U2OS	2	0	77	0.181818	0.818182	0.25	0.888889	0.047619	0.0634921	0.75	0.321429	0.125	0.0892857	99.3333	#DIV/0!	0.877466	0.0854137	0.0371199	#DIV/0!	0.27287	0.183282	0.0858335	0
A-108	Multiplex	EUB0000736a	CN1C=NC=C1[C@@](COC2=C(C3=CC=C(OC(F)(F)F)C=C3)C=C(C#N)C=C2)(C4=CC=C(C#N)C=C4)O	Chemogenomic candidate	10	12	HEK293T	1	0.679451	582	0.149485	0.850515	0.206522	0.644444	0.169697	0.185859	0.793478	0.0846395	0.0438871	0.0877743	691.5	0.185934	0.698273	0.149796	0.151931	0.814066	0.0267306	0.0412745	0.044192	1.10218
A-108	Multiplex	EUB0000736a	CN1C=NC=C1[C@@](COC2=C(C3=CC=C(OC(F)(F)F)C=C3)C=C(C#N)C=C2)(C4=CC=C(C#N)C=C4)O	Chemogenomic candidate	10	24	HEK293T	2	0.962971	3226	0.0344079	0.965592	0.05	0.711075	0.263242	0.0256822	0.95	0.168397	0.0234763	0.0839729	3025.33	0.160951	0.737455	0.183731	0.0788139	0.839049	0.452063	0.229554	0.0699568	0.474195
A-108	Multiplex	EUB0000736a	CN1C=NC=C1[C@@](COC2=C(C3=CC=C(OC(F)(F)F)C=C3)C=C(C#N)C=C2)(C4=CC=C(C#N)C=C4)O	Chemogenomic candidate	10	12	human fibroblast	1	2.07179	337	0.127596	0.872404	0.833333	0.663265	0.193878	0.142857	0.166667	0.107692	0.0717949	0.0820513	230.667	0.695283	0.596796	0.258529	0.144676	0.304717	0.0342007	0.0357415	0.0583164	1.23771
A-108	Multiplex	EUB0000736a	CN1C=NC=C1[C@@](COC2=C(C3=CC=C(OC(F)(F)F)C=C3)C=C(C#N)C=C2)(C4=CC=C(C#N)C=C4)O	Chemogenomic candidate	10	12	U2OS	2	0.974804	164	0.0853659	0.914634	0.5	0.906667	0.0666667	0.0266667	0.5	0.272059	0.213235	0.0808824	139.167	0.248909	0.881032	0.0702926	0.0486752	0.751091	0.279715	0.240817	0.0972624	1.01342
A-108	Multiplex	EUB0000736a	CN1C=NC=C1[C@@](COC2=C(C3=CC=C(OC(F)(F)F)C=C3)C=C(C#N)C=C2)(C4=CC=C(C#N)C=C4)O	Chemogenomic candidate	10	24	human fibroblast	1	0.952476	318	0.163522	0.836478	0.589744	0.691729	0.161654	0.146617	0.410256	0.0543478	0.0380435	0.0706522	242.833	0.651394	0.612787	0.255064	0.132149	0.348606	0.025027	0.0173706	0.0467803	1.19614
A-108	Multiplex	EUB0000736a	CN1C=NC=C1[C@@](COC2=C(C3=CC=C(OC(F)(F)F)C=C3)C=C(C#N)C=C2)(C4=CC=C(C#N)C=C4)O	Chemogenomic candidate	10	0	U2OS	2	0	129	0.170543	0.829457	0	0.841121	0.0747664	0.0841121	1	0.333333	0.166667	0.0666667	99.3333	#DIV/0!	0.877466	0.0854137	0.0371199	#DIV/0!	0.27287	0.183282	0.0858335	0
A-108	Multiplex	EUB0000736a	CN1C=NC=C1[C@@](COC2=C(C3=CC=C(OC(F)(F)F)C=C3)C=C(C#N)C=C2)(C4=CC=C(C#N)C=C4)O	Chemogenomic candidate	10	0	U2OS	1	0	115	0.0434783	0.956522	0.571429	0.827273	0.109091	0.0636364	0.428571	0.351648	0.0989011	0.0549451	156.5	0.597808	0.882455	0.0611652	0.0563801	0.402192	0.271242	0.126392	0.10096	0
A-108	Multiplex	EUB0000736a	CN1C=NC=C1[C@@](COC2=C(C3=CC=C(OC(F)(F)F)C=C3)C=C(C#N)C=C2)(C4=CC=C(C#N)C=C4)O	Chemogenomic candidate	10	0	human fibroblast	1	0	231	0.0865801	0.91342	0.774194	0.57346	0.279621	0.146919	0.225806	0.0413223	0.115702	0.0495868	211.75	0.805591	0.539397	0.278942	0.181661	0.194409	0.021052	0.100182	0.0283348	#DIV/0!
A-108	Multiplex	EUB0000736a	CN1C=NC=C1[C@@](COC2=C(C3=CC=C(OC(F)(F)F)C=C3)C=C(C#N)C=C2)(C4=CC=C(C#N)C=C4)O	Chemogenomic candidate	10	12	HEK293T	2	0.969106	1952	0.0210041	0.978996	0.144231	0.85191	0.0936682	0.0544218	0.855769	0.150491	0.0780098	0.0276413	1765.83	0.0828653	0.866876	0.0909282	0.0421957	0.917135	0.0464362	0.0760075	0.0151675	0.999314
A-108	Multiplex	EUB0000736a	CN1C=NC=C1[C@@](COC2=C(C3=CC=C(OC(F)(F)F)C=C3)C=C(C#N)C=C2)(C4=CC=C(C#N)C=C4)O	Chemogenomic candidate	10	0	HEK293T	1	0	854	0.152896	0.847104	0.110092	0.597534	0.158072	0.244395	0.889908	0.0206379	0.125704	0.0262664	865.667	0.13691	0.491163	0.230041	0.278796	0.86309	0.0185405	0.129798	0.0320833	#DIV/0!
A-108	Multiplex	EUB0000736a	CN1C=NC=C1[C@@](COC2=C(C3=CC=C(OC(F)(F)F)C=C3)C=C(C#N)C=C2)(C4=CC=C(C#N)C=C4)O	Chemogenomic candidate	10	0	human fibroblast	1	0	294	0.0714286	0.928571	0.803571	0.575092	0.21978	0.205128	0.196429	0.0191083	0.101911	0.0254777	211.75	0.805591	0.539397	0.278942	0.181661	0.194409	0.021052	0.100182	0.0283348	#DIV/0!
A-108	Multiplex	EUB0000736a	CN1C=NC=C1[C@@](COC2=C(C3=CC=C(OC(F)(F)F)C=C3)C=C(C#N)C=C2)(C4=CC=C(C#N)C=C4)O	Chemogenomic candidate	10	0	HEK293T	2	0	1066	0.0300188	0.969981	0.159091	0.777563	0.0522244	0.170213	0.840909	0.00124378	0.333333	0	1080.25	0.142406	0.776982	0.0533037	0.169714	0.857594	0.00453037	0.323128	0.00113292	#DIV/0!
A-108	Multiplex	EUB0000736a	CN1C=NC=C1[C@@](COC2=C(C3=CC=C(OC(F)(F)F)C=C3)C=C(C#N)C=C2)(C4=CC=C(C#N)C=C4)O	Chemogenomic candidate	10	0	HEK293T	2	0	1164	0.0266323	0.973368	0.148936	0.794351	0.0397176	0.165931	0.851064	0.00333333	0.28	0	1080.25	0.142406	0.776982	0.0533037	0.169714	0.857594	0.00453037	0.323128	0.00113292	#DIV/0!
A-1155463	Multiplex	EUB0000262b	CN(C)CC#Cc1ccc(OCCCc2sc(N3CCc4cccc(C(=O)Nc5nc6ccccc6s5)c4C3)nc2C(=O)O)c(F)c1	Chemogenomic candidate	1	24	human fibroblast	1	-0.048267	134	0.11194	0.88806	0.627907	0.336134	0.302521	0.361345	0.372093	0.5	0.075	0.375	106.75	0.494315	0.513538	0.210808	0.275654	0.505685	0.339408	0.0326339	0.298699	1.11839	tag healthy nuclei < 50 %
A-1155463	Multiplex	EUB0000262b	CN(C)CC#Cc1ccc(OCCCc2sc(N3CCc4cccc(C(=O)Nc5nc6ccccc6s5)c4C3)nc2C(=O)O)c(F)c1	Chemogenomic candidate	1	12	human fibroblast	1	0.157944	111	0.126126	0.873874	0.740741	0.443299	0.278351	0.278351	0.259259	0.465116	0.0930233	0.302326	107.083	0.631736	0.44459	0.220734	0.334676	0.368264	0.315502	0.0769574	0.274792	1.29875	tag healthy nuclei < 50 %
A-1155463	Multiplex	EUB0000262b	CN(C)CC#Cc1ccc(OCCCc2sc(N3CCc4cccc(C(=O)Nc5nc6ccccc6s5)c4C3)nc2C(=O)O)c(F)c1	Chemogenomic candidate	10	12	U2OS	2	-0.382237	133	0.0526316	0.947368	0.866667	0.428571	0.333333	0.238095	0.133333	0.259259	0.166667	0.240741	78.3333	0.502249	0.830741	0.0963907	0.0728682	0.497751	0.154861	0.0827165	0.0293447	1.11609	tag healthy nuclei < 50 %
A-1155463	Multiplex	EUB0000262b	CN(C)CC#Cc1ccc(OCCCc2sc(N3CCc4cccc(C(=O)Nc5nc6ccccc6s5)c4C3)nc2C(=O)O)c(F)c1	Chemogenomic candidate	10	12	human fibroblast	2	-0.382237	133	0.0526316	0.947368	0.866667	0.428571	0.333333	0.238095	0.133333	0.259259	0.166667	0.240741	106.333	0.502249	0.830741	0.0963907	0.0728682	0.497751	0.154861	0.0827165	0.0293447	1.11609	tag healthy nuclei < 50 %
A-1155463	Multiplex	EUB0000262b	CN(C)CC#Cc1ccc(OCCCc2sc(N3CCc4cccc(C(=O)Nc5nc6ccccc6s5)c4C3)nc2C(=O)O)c(F)c1	Chemogenomic candidate	10	48	U2OS	1	0.0772583	246	0.097561	0.902439	0.747253	0.324324	0.265766	0.40991	0.252747	0.111111	0.388889	0.236111	330	0.352767	0.881662	0.0538695	0.0644681	0.647233	0.102719	0.0952982	0.0225671	1.00252	tag healthy nuclei < 50 %
A-1155463	Multiplex	EUB0000262b	CN(C)CC#Cc1ccc(OCCCc2sc(N3CCc4cccc(C(=O)Nc5nc6ccccc6s5)c4C3)nc2C(=O)O)c(F)c1	Chemogenomic candidate	10	24	U2OS	2	-0.132586	135	0.103704	0.896296	0.814815	0.454545	0.322314	0.22314	0.185185	0.218182	0.145455	0.2	102.167	0.521098	0.831195	0.0931875	0.0756178	0.478902	0.166245	0.0748286	0.0347485	1.01542	tag healthy nuclei < 50 %
A-1155463	Multiplex	EUB0000262b	CN(C)CC#Cc1ccc(OCCCc2sc(N3CCc4cccc(C(=O)Nc5nc6ccccc6s5)c4C3)nc2C(=O)O)c(F)c1	Chemogenomic candidate	10	24	human fibroblast	2	-0.132586	135	0.103704	0.896296	0.814815	0.454545	0.322314	0.22314	0.185185	0.218182	0.145455	0.2	108.083	0.521098	0.831195	0.0931875	0.0756178	0.478902	0.166245	0.0748286	0.0347485	1.01542	tag healthy nuclei < 50 %
A-1155463	Multiplex	EUB0000262b	CN(C)CC#Cc1ccc(OCCCc2sc(N3CCc4cccc(C(=O)Nc5nc6ccccc6s5)c4C3)nc2C(=O)O)c(F)c1	Chemogenomic candidate	10	0	human fibroblast	1	0	211	0.146919	0.853081	0.632353	0.3	0.322222	0.377778	0.367647	0.314815	0.203704	0.148148	125.417	0.662404	0.310276	0.328567	0.361157	0.337596	0.203306	0.230525	0.0840641	#DIV/0!	tag healthy nuclei < 50 %
A-1155463	Multiplex	EUB0000262b	CN(C)CC#Cc1ccc(OCCCc2sc(N3CCc4cccc(C(=O)Nc5nc6ccccc6s5)c4C3)nc2C(=O)O)c(F)c1	Chemogenomic candidate	10	12	HEK293T	2	1.67582	263	0.0722433	0.927757	0.185567	0.393443	0.209016	0.397541	0.814433	0.260417	0.177083	0.104167	256.75	0.112092	0.454373	0.0637918	0.481836	0.887908	0.182057	0.132768	0.0724535	1.03765	tag healthy nuclei < 50 %
A-1155463	Multiplex	EUB0000262b	CN(C)CC#Cc1ccc(OCCCc2sc(N3CCc4cccc(C(=O)Nc5nc6ccccc6s5)c4C3)nc2C(=O)O)c(F)c1	Chemogenomic candidate	1	48	HEK293T	1	1.46084	322	0.177019	0.822981	0.335938	0.354717	0.162264	0.483019	0.664062	0.37234	0.308511	0.0957447	351.333	0.392717	0.429172	0.195155	0.375673	0.607283	0.266274	0.27356	0.0493784	0.987254	tag healthy nuclei < 50 %
A-1155463	Multiplex	EUB0000262b	CN(C)CC#Cc1ccc(OCCCc2sc(N3CCc4cccc(C(=O)Nc5nc6ccccc6s5)c4C3)nc2C(=O)O)c(F)c1	Chemogenomic candidate	1	48	U2OS	1	0.560507	285	0.105263	0.894737	0.675676	0.466667	0.243137	0.290196	0.324324	0.10084	0.184874	0.0756303	330	0.352767	0.881662	0.0538695	0.0644681	0.647233	0.102719	0.0952982	0.0225671	1.00252	tag healthy nuclei < 50 %
A-1155463	Multiplex	EUB0000262b	CN(C)CC#Cc1ccc(OCCCc2sc(N3CCc4cccc(C(=O)Nc5nc6ccccc6s5)c4C3)nc2C(=O)O)c(F)c1	Chemogenomic candidate	1	0	human fibroblast	1	0	162	0.12963	0.87037	0.688525	0.29078	0.276596	0.432624	0.311475	0.219512	0.146341	0.0731707	125.417	0.662404	0.310276	0.328567	0.361157	0.337596	0.203306	0.230525	0.0840641	#DIV/0!	tag healthy nuclei < 50 %
A-1155463	Multiplex	EUB0000262b	CN(C)CC#Cc1ccc(OCCCc2sc(N3CCc4cccc(C(=O)Nc5nc6ccccc6s5)c4C3)nc2C(=O)O)c(F)c1	Chemogenomic candidate	1	12	HEK293T	2	1.43033	177	0.039548	0.960452	0.151163	0.447059	0.0470588	0.505882	0.848837	0.171053	0.171053	0.0657895	256.75	0.112092	0.454373	0.0637918	0.481836	0.887908	0.182057	0.132768	0.0724535	1.03765	tag healthy nuclei < 50 %
A-1155463	Multiplex	EUB0000262b	CN(C)CC#Cc1ccc(OCCCc2sc(N3CCc4cccc(C(=O)Nc5nc6ccccc6s5)c4C3)nc2C(=O)O)c(F)c1	Chemogenomic candidate	10	0	HEK293T	2	0	164	0.0670732	0.932927	0.0952381	0.215686	0.0980392	0.686275	0.904762	0.030303	0.272727	0	233.167	0.0929753	0.24237	0.0798532	0.677777	0.907025	0.0412417	0.171457	0.0110984	#DIV/0!	tag healthy nuclei < 50 %
A-1155463	Multiplex	EUB0000262b	CN(C)CC#Cc1ccc(OCCCc2sc(N3CCc4cccc(C(=O)Nc5nc6ccccc6s5)c4C3)nc2C(=O)O)c(F)c1	Chemogenomic candidate	1	0	HEK293T	2	0	147	0.047619	0.952381	0.049505	0.207143	0.0714286	0.721429	0.950495	0.0689655	0.0689655	0	233.167	0.0929753	0.24237	0.0798532	0.677777	0.907025	0.0412417	0.171457	0.0110984	#DIV/0!	tag healthy nuclei < 50 %
A-1155463	Multiplex	EUB0000262b	CN(C)CC#Cc1ccc(OCCCc2sc(N3CCc4cccc(C(=O)Nc5nc6ccccc6s5)c4C3)nc2C(=O)O)c(F)c1	Chemogenomic candidate	1	24	HEK293T	1	0.754995	286	0.143357	0.856643	0.483871	0.383673	0.110204	0.506122	0.516129	0.37234	0.542553	0.0425532	293.167	0.429543	0.395461	0.147538	0.457001	0.570457	0.312274	0.510446	0.0420248	1.14297	tag healthy nuclei < 50 %, tag mitochondrial mass > 50 %
A-1155463	Multiplex	EUB0000262b	CN(C)CC#Cc1ccc(OCCCc2sc(N3CCc4cccc(C(=O)Nc5nc6ccccc6s5)c4C3)nc2C(=O)O)c(F)c1	Chemogenomic candidate	1	12	HEK293T	1	1.21913	278	0.118705	0.881295	0.339286	0.420408	0.122449	0.457143	0.660714	0.407767	0.68932	0.0291262	274.667	0.427177	0.372026	0.131275	0.496699	0.572823	0.324854	0.687273	0.0469186	1.209	tag healthy nuclei < 50 %, tag mitochondrial mass > 50 %
A-1155463	Multiplex	EUB0000262b	CN(C)CC#Cc1ccc(OCCCc2sc(N3CCc4cccc(C(=O)Nc5nc6ccccc6s5)c4C3)nc2C(=O)O)c(F)c1	Chemogenomic candidate	1	0	HEK293T	1	0	258	0.0891473	0.910853	0.316456	0.229787	0.0978723	0.67234	0.683544	0.0185185	0.796296	0.0185185	256.5	0.333294	0.212413	0.0958204	0.691766	0.666706	0.0141172	0.774309	0.00115741	#DIV/0!	tag healthy nuclei < 50 %, tag mitochondrial mass > 50 %
A-1155463	Multiplex	EUB0000262b	CN(C)CC#Cc1ccc(OCCCc2sc(N3CCc4cccc(C(=O)Nc5nc6ccccc6s5)c4C3)nc2C(=O)O)c(F)c1	Chemogenomic candidate	10	0	HEK293T	1	0	288	0.0902778	0.909722	0.331522	0.240458	0.0572519	0.70229	0.668478	0.015873	0.777778	0.015873	256.5	0.333294	0.212413	0.0958204	0.691766	0.666706	0.0141172	0.774309	0.00115741	#DIV/0!	tag healthy nuclei < 50 %, tag mitochondrial mass > 50 %
A-1155463	Multiplex	EUB0000262b	CN(C)CC#Cc1ccc(OCCCc2sc(N3CCc4cccc(C(=O)Nc5nc6ccccc6s5)c4C3)nc2C(=O)O)c(F)c1	Chemogenomic candidate	10	48	human fibroblast	1	18.081	135	0.103704	0.896296	0.666667	0.396694	0.380165	0.22314	0.333333	0.8125	0.104167	0.5	110.667	0.531499	0.514801	0.276708	0.208491	0.468501	0.298464	0.0241518	0.276892	5.201	tag healthy nuclei < 50 %, tag tubulin effect > 50 %
A-1155463	Multiplex	EUB0000262b	CN(C)CC#Cc1ccc(OCCCc2sc(N3CCc4cccc(C(=O)Nc5nc6ccccc6s5)c4C3)nc2C(=O)O)c(F)c1	Chemogenomic candidate	10	12	human fibroblast	1	0.607416	173	0.115607	0.884393	0.634615	0.411765	0.248366	0.339869	0.365385	0.746032	0.047619	0.428571	107.083	0.631736	0.44459	0.220734	0.334676	0.368264	0.315502	0.0769574	0.274792	1.29875	tag healthy nuclei < 50 %, tag tubulin effect > 50 %
A-1155463	Multiplex	EUB0000262b	CN(C)CC#Cc1ccc(OCCCc2sc(N3CCc4cccc(C(=O)Nc5nc6ccccc6s5)c4C3)nc2C(=O)O)c(F)c1	Chemogenomic candidate	1	48	human fibroblast	1	23.9408	106	0.188679	0.811321	0.689655	0.348837	0.313953	0.337209	0.310345	0.566667	0.0333333	0.2	110.667	0.531499	0.514801	0.276708	0.208491	0.468501	0.298464	0.0241518	0.276892	5.201	tag healthy nuclei < 50 %, tag tubulin effect > 50 %
A-1155463	Multiplex	EUB0000262b	CN(C)CC#Cc1ccc(OCCCc2sc(N3CCc4cccc(C(=O)Nc5nc6ccccc6s5)c4C3)nc2C(=O)O)c(F)c1	Chemogenomic candidate	10	24	HEK293T	1	0.857882	298	0.104027	0.895973	0.423729	0.434457	0.123596	0.441948	0.576271	0.543103	0.353448	0.146552	293.167	0.429543	0.395461	0.147538	0.457001	0.570457	0.312274	0.510446	0.0420248	1.14297	tag healthy nuclei < 50 %, tag tubulin effect > 50 %
A-1155463	Multiplex	EUB0000262b	CN(C)CC#Cc1ccc(OCCCc2sc(N3CCc4cccc(C(=O)Nc5nc6ccccc6s5)c4C3)nc2C(=O)O)c(F)c1	Chemogenomic candidate	10	12	HEK293T	1	0.945162	288	0.104167	0.895833	0.40625	0.418605	0.0852713	0.496124	0.59375	0.648148	0.638889	0.138889	274.667	0.427177	0.372026	0.131275	0.496699	0.572823	0.324854	0.687273	0.0469186	1.209	tag healthy nuclei < 50 %, tag tubulin effect > 50 %, tag mitochondrial mass > 50 %
A-1155463	Multiplex	EUB0000262b	CN(C)CC#Cc1ccc(OCCCc2sc(N3CCc4cccc(C(=O)Nc5nc6ccccc6s5)c4C3)nc2C(=O)O)c(F)c1	Chemogenomic candidate	10	48	U2OS	2	-0.199946	139	0.0863309	0.913669	0.815789	0.354331	0.346457	0.299213	0.184211	0.577778	0.511111	0.577778	153.583	0.433939	0.864953	0.0805245	0.0545227	0.566061	0.197701	0.115167	0.0429551	1.00576	tag healthy nuclei < 50 %, tag tubulin effect > 50 %, tag mitochondrial mass > 50 %, tag membrane permeabilized > 50 %
A-1155463	Multiplex	EUB0000262b	CN(C)CC#Cc1ccc(OCCCc2sc(N3CCc4cccc(C(=O)Nc5nc6ccccc6s5)c4C3)nc2C(=O)O)c(F)c1	Chemogenomic candidate	10	24	human fibroblast	1	1.03577	170	0.0941176	0.905882	0.714286	0.5	0.272727	0.227273	0.285714	0.766234	0.025974	0.441558	106.75	0.494315	0.513538	0.210808	0.275654	0.505685	0.339408	0.0326339	0.298699	1.11839	tag tubulin effect > 50 %
A-1155463	Multiplex	EUB0000262b	CN(C)CC#Cc1ccc(OCCCc2sc(N3CCc4cccc(C(=O)Nc5nc6ccccc6s5)c4C3)nc2C(=O)O)c(F)c1	Chemogenomic candidate	10	48	human fibroblast	2	-0.526058	145	0.144828	0.855172	0.954545	0.572581	0.25	0.177419	0.0454545	0.746479	0.0985915	0.352113	108	0.498611	0.755765	0.214424	0.0298114	0.501389	0.304063	0.0278827	0.153127	1.11404	tag tubulin effect > 50 %
A-1155463	Multiplex	EUB0000262b	CN(C)CC#Cc1ccc(OCCCc2sc(N3CCc4cccc(C(=O)Nc5nc6ccccc6s5)c4C3)nc2C(=O)O)c(F)c1	Chemogenomic candidate	10	48	HEK293T	1	2.91274	390	0.115385	0.884615	0.402062	0.568116	0.150725	0.281159	0.597938	0.520408	0.132653	0.30102	351.333	0.392717	0.429172	0.195155	0.375673	0.607283	0.266274	0.27356	0.0493784	0.987254	tag tubulin effect > 50 %
A-1155463	Multiplex	EUB0000262b	CN(C)CC#Cc1ccc(OCCCc2sc(N3CCc4cccc(C(=O)Nc5nc6ccccc6s5)c4C3)nc2C(=O)O)c(F)c1	Chemogenomic candidate	10	48	HEK293T	2	0.848662	365	0.0383562	0.961644	0.0895522	0.655271	0.153846	0.190883	0.910448	0.486957	0.026087	0.43913	594.833	0.0998693	0.826482	0.0664568	0.107061	0.900131	0.232673	0.0431769	0.0808889	1.00265
A-1155463	Multiplex	EUB0000262b	CN(C)CC#Cc1ccc(OCCCc2sc(N3CCc4cccc(C(=O)Nc5nc6ccccc6s5)c4C3)nc2C(=O)O)c(F)c1	Chemogenomic candidate	1	48	human fibroblast	2	-0.436183	105	0.114286	0.885714	0.8	0.537634	0.354839	0.107527	0.2	0.44	0.06	0.28	108	0.498611	0.755765	0.214424	0.0298114	0.501389	0.304063	0.0278827	0.153127	1.11404
A-1155463	Multiplex	EUB0000262b	CN(C)CC#Cc1ccc(OCCCc2sc(N3CCc4cccc(C(=O)Nc5nc6ccccc6s5)c4C3)nc2C(=O)O)c(F)c1	Chemogenomic candidate	10	24	HEK293T	2	1.13559	287	0.0313589	0.968641	0.240506	0.521583	0.194245	0.284173	0.759494	0.482759	0.137931	0.206897	322.417	0.125402	0.652444	0.053119	0.294437	0.874598	0.274867	0.112063	0.0970907	1.01358
A-1155463	Multiplex	EUB0000262b	CN(C)CC#Cc1ccc(OCCCc2sc(N3CCc4cccc(C(=O)Nc5nc6ccccc6s5)c4C3)nc2C(=O)O)c(F)c1	Chemogenomic candidate	1	48	HEK293T	2	1.09034	397	0.0453401	0.95466	0.0576923	0.78628	0.0765172	0.137203	0.942308	0.261745	0.0402685	0.194631	594.833	0.0998693	0.826482	0.0664568	0.107061	0.900131	0.232673	0.0431769	0.0808889	1.00265
A-1155463	Multiplex	EUB0000262b	CN(C)CC#Cc1ccc(OCCCc2sc(N3CCc4cccc(C(=O)Nc5nc6ccccc6s5)c4C3)nc2C(=O)O)c(F)c1	Chemogenomic candidate	1	48	U2OS	2	0.316049	117	0.0598291	0.940171	0.772727	0.518182	0.281818	0.2	0.227273	0.368421	0.438596	0.192982	153.583	0.433939	0.864953	0.0805245	0.0545227	0.566061	0.197701	0.115167	0.0429551	1.00576
A-1155463	Multiplex	EUB0000262b	CN(C)CC#Cc1ccc(OCCCc2sc(N3CCc4cccc(C(=O)Nc5nc6ccccc6s5)c4C3)nc2C(=O)O)c(F)c1	Chemogenomic candidate	1	24	HEK293T	2	1.0797	220	0.0227273	0.977273	0.105882	0.562791	0.0418605	0.395349	0.894118	0.247934	0.0743802	0.173554	322.417	0.125402	0.652444	0.053119	0.294437	0.874598	0.274867	0.112063	0.0970907	1.01358
A-1155463	Multiplex	EUB0000262b	CN(C)CC#Cc1ccc(OCCCc2sc(N3CCc4cccc(C(=O)Nc5nc6ccccc6s5)c4C3)nc2C(=O)O)c(F)c1	Chemogenomic candidate	1	12	U2OS	1	-0.603193	175	0.125714	0.874286	0.636364	0.653595	0.130719	0.215686	0.363636	0.11	0.14	0.14	165.75	0.37331	0.780206	0.114105	0.10569	0.62669	0.0951184	0.0845665	0.073208	1.05123
A-1155463	Multiplex	EUB0000262b	CN(C)CC#Cc1ccc(OCCCc2sc(N3CCc4cccc(C(=O)Nc5nc6ccccc6s5)c4C3)nc2C(=O)O)c(F)c1	Chemogenomic candidate	10	24	U2OS	1	-0.398066	194	0.056701	0.943299	0.588235	0.513661	0.20765	0.278689	0.411765	0.12766	0.234043	0.138298	212.417	0.319581	0.825187	0.0885786	0.0862345	0.680419	0.098522	0.0722682	0.0503222	0.99162
A-1155463	Multiplex	EUB0000262b	CN(C)CC#Cc1ccc(OCCCc2sc(N3CCc4cccc(C(=O)Nc5nc6ccccc6s5)c4C3)nc2C(=O)O)c(F)c1	Chemogenomic candidate	1	12	U2OS	2	0.546054	86	0.0465116	0.953488	0.666667	0.536585	0.390244	0.0731707	0.333333	0.272727	0.318182	0.136364	78.3333	0.502249	0.830741	0.0963907	0.0728682	0.497751	0.154861	0.0827165	0.0293447	1.11609
A-1155463	Multiplex	EUB0000262b	CN(C)CC#Cc1ccc(OCCCc2sc(N3CCc4cccc(C(=O)Nc5nc6ccccc6s5)c4C3)nc2C(=O)O)c(F)c1	Chemogenomic candidate	1	12	human fibroblast	2	0.546054	86	0.0465116	0.953488	0.666667	0.536585	0.390244	0.0731707	0.333333	0.272727	0.318182	0.136364	106.333	0.502249	0.830741	0.0963907	0.0728682	0.497751	0.154861	0.0827165	0.0293447	1.11609
A-1155463	Multiplex	EUB0000262b	CN(C)CC#Cc1ccc(OCCCc2sc(N3CCc4cccc(C(=O)Nc5nc6ccccc6s5)c4C3)nc2C(=O)O)c(F)c1	Chemogenomic candidate	1	24	U2OS	2	0.256676	92	0.076087	0.923913	0.5	0.541176	0.364706	0.0941176	0.5	0.282609	0.326087	0.130435	102.167	0.521098	0.831195	0.0931875	0.0756178	0.478902	0.166245	0.0748286	0.0347485	1.01542
A-1155463	Multiplex	EUB0000262b	CN(C)CC#Cc1ccc(OCCCc2sc(N3CCc4cccc(C(=O)Nc5nc6ccccc6s5)c4C3)nc2C(=O)O)c(F)c1	Chemogenomic candidate	1	24	human fibroblast	2	0.256676	92	0.076087	0.923913	0.5	0.541176	0.364706	0.0941176	0.5	0.282609	0.326087	0.130435	108.083	0.521098	0.831195	0.0931875	0.0756178	0.478902	0.166245	0.0748286	0.0347485	1.01542
A-1155463	Multiplex	EUB0000262b	CN(C)CC#Cc1ccc(OCCCc2sc(N3CCc4cccc(C(=O)Nc5nc6ccccc6s5)c4C3)nc2C(=O)O)c(F)c1	Chemogenomic candidate	1	24	U2OS	1	-0.07993	222	0.0540541	0.945946	0.478261	0.585714	0.195238	0.219048	0.521739	0.0650407	0.154472	0.113821	212.417	0.319581	0.825187	0.0885786	0.0862345	0.680419	0.098522	0.0722682	0.0503222	0.99162
A-1155463	Multiplex	EUB0000262b	CN(C)CC#Cc1ccc(OCCCc2sc(N3CCc4cccc(C(=O)Nc5nc6ccccc6s5)c4C3)nc2C(=O)O)c(F)c1	Chemogenomic candidate	10	12	U2OS	1	-0.690145	189	0.0634921	0.936508	0.617647	0.553672	0.254237	0.19209	0.382353	0.132653	0.153061	0.0816327	165.75	0.37331	0.780206	0.114105	0.10569	0.62669	0.0951184	0.0845665	0.073208	1.05123
A-1155463	Multiplex	EUB0000262b	CN(C)CC#Cc1ccc(OCCCc2sc(N3CCc4cccc(C(=O)Nc5nc6ccccc6s5)c4C3)nc2C(=O)O)c(F)c1	Chemogenomic candidate	10	0	U2OS	1	0	224	0.129464	0.870536	0.45	0.707692	0.189744	0.102564	0.55	0.108696	0.282609	0.0724638	152.167	0.315784	0.706662	0.13121	0.162128	0.684216	0.118789	0.261243	0.0625529	0
A-1155463	Multiplex	EUB0000262b	CN(C)CC#Cc1ccc(OCCCc2sc(N3CCc4cccc(C(=O)Nc5nc6ccccc6s5)c4C3)nc2C(=O)O)c(F)c1	Chemogenomic candidate	1	0	U2OS	1	0	195	0.0769231	0.923077	0.32	0.727778	0.133333	0.138889	0.68	0.129771	0.229008	0.0687023	152.167	0.315784	0.706662	0.13121	0.162128	0.684216	0.118789	0.261243	0.0625529	0
A-1155463	Multiplex	EUB0000262b	CN(C)CC#Cc1ccc(OCCCc2sc(N3CCc4cccc(C(=O)Nc5nc6ccccc6s5)c4C3)nc2C(=O)O)c(F)c1	Chemogenomic candidate	1	0	human fibroblast	2	0	107	0.0747664	0.925234	0.769231	0.616162	0.252525	0.131313	0.230769	0.163934	0.295082	0.0655738	101.167	0.681754	0.642258	0.240072	0.11767	0.318246	0.20189	0.247166	0.0567674	#DIV/0!
A-1155463	Multiplex	EUB0000262b	CN(C)CC#Cc1ccc(OCCCc2sc(N3CCc4cccc(C(=O)Nc5nc6ccccc6s5)c4C3)nc2C(=O)O)c(F)c1	Chemogenomic candidate	10	0	human fibroblast	2	0	155	0.103226	0.896774	0.647059	0.661871	0.215827	0.122302	0.352941	0.163043	0.228261	0.0434783	101.167	0.681754	0.642258	0.240072	0.11767	0.318246	0.20189	0.247166	0.0567674	#DIV/0!
A-1155463	Multiplex	EUB0000262b	CN(C)CC#Cc1ccc(OCCCc2sc(N3CCc4cccc(C(=O)Nc5nc6ccccc6s5)c4C3)nc2C(=O)O)c(F)c1	Chemogenomic candidate	10	0	U2OS	2	0	88	0.0681818	0.931818	0.222222	0.731707	0.158537	0.109756	0.777778	0.133333	0.216667	0.0333333	70.3333	0.262184	0.811025	0.0807672	0.108207	0.737816	0.0985605	0.153729	0.0272522	0
A-1155463	Multiplex	EUB0000262b	CN(C)CC#Cc1ccc(OCCCc2sc(N3CCc4cccc(C(=O)Nc5nc6ccccc6s5)c4C3)nc2C(=O)O)c(F)c1	Chemogenomic candidate	1	0	U2OS	2	0	78	0.102564	0.897436	0.3	0.571429	0.285714	0.142857	0.7	0.275	0.05	0.025	70.3333	0.262184	0.811025	0.0807672	0.108207	0.737816	0.0985605	0.153729	0.0272522	0
A-485	Multiplex	EUB0000328a	C[C@H](N(C(CN1C([C@]2(OC1=O)CCC3=CC(NC(NC)=O)=CC=C23)=O)=O)CC4=CC=C(F)C=C4)C(F)(F)F	Chemogenomic candidate	1	24	human fibroblast	2	7.60382	61	0.393443	0.606557	0.5	0.378378	0.513514	0.108108	0.5	0.214286	0	0.357143	80.0833	0.552381	0.346171	0.555718	0.0981105	0.447619	0.11087	0.120814	0.103	231110	tag healthy nuclei < 50 %
A-485	Multiplex	EUB0000328a	C[C@H](N(C(CN1C([C@]2(OC1=O)CCC3=CC(NC(NC)=O)=CC=C23)=O)=O)CC4=CC=C(F)C=C4)C(F)(F)F	Chemogenomic candidate	1	0	human fibroblast	2	0	78	0.294872	0.705128	0.6	0.290909	0.527273	0.181818	0.4	0.0625	0.1875	0.125	99.3333	0.557903	0.293865	0.595118	0.111016	0.442097	0.112114	0.290215	0.0427216	#DIV/0!	tag healthy nuclei < 50 %
A-485	Multiplex	EUB0000328a	C[C@H](N(C(CN1C([C@]2(OC1=O)CCC3=CC(NC(NC)=O)=CC=C23)=O)=O)CC4=CC=C(F)C=C4)C(F)(F)F	Chemogenomic candidate	1	12	human fibroblast	2	-0.999997	69	0.376812	0.623188	0.333333	0.395349	0.534884	0.0697674	0.666667	0.235294	0.176471	0.117647	84.3333	0.520833	0.311795	0.58592	0.102285	0.479167	0.125354	0.149616	0.0949875	7.64557e+11	tag healthy nuclei < 50 %
A-485	Multiplex	EUB0000328a	C[C@H](N(C(CN1C([C@]2(OC1=O)CCC3=CC(NC(NC)=O)=CC=C23)=O)=O)CC4=CC=C(F)C=C4)C(F)(F)F	Chemogenomic candidate	1	0	human fibroblast	2	0	84	0.369048	0.630952	0.285714	0.245283	0.622642	0.132075	0.714286	0.0769231	0.230769	0.0769231	99.3333	0.557903	0.293865	0.595118	0.111016	0.442097	0.112114	0.290215	0.0427216	#DIV/0!	tag healthy nuclei < 50 %
A-485	Multiplex	EUB0000328a	C[C@H](N(C(CN1C([C@]2(OC1=O)CCC3=CC(NC(NC)=O)=CC=C23)=O)=O)CC4=CC=C(F)C=C4)C(F)(F)F	Chemogenomic candidate	1	24	human fibroblast	2	-0.979307	99	0.515152	0.484848	0.5	0.291667	0.625	0.0833333	0.5	0.428571	0.214286	0.0714286	80.0833	0.552381	0.346171	0.555718	0.0981105	0.447619	0.11087	0.120814	0.103	231110	tag healthy nuclei < 50 %
A-485	Multiplex	EUB0000328a	C[C@H](N(C(CN1C([C@]2(OC1=O)CCC3=CC(NC(NC)=O)=CC=C23)=O)=O)CC4=CC=C(F)C=C4)C(F)(F)F	Chemogenomic candidate	1	0	HEK293T	1	0	857	0.327763	0.672237	0.171233	0.397706	0.323136	0.279159	0.828767	0.0144231	0.110577	0.0432692	865.667	0.13691	0.491163	0.230041	0.278796	0.86309	0.0185405	0.129798	0.0320833	#DIV/0!	tag healthy nuclei < 50 %
A-485	Multiplex	EUB0000328a	C[C@H](N(C(CN1C([C@]2(OC1=O)CCC3=CC(NC(NC)=O)=CC=C23)=O)=O)CC4=CC=C(F)C=C4)C(F)(F)F	Chemogenomic candidate	1	0	HEK293T	1	0	1047	0.240858	0.759142	0.160221	0.440199	0.259136	0.300664	0.839779	0.0226415	0.162264	0.0188679	865.667	0.13691	0.491163	0.230041	0.278796	0.86309	0.0185405	0.129798	0.0320833	#DIV/0!	tag healthy nuclei < 50 %
A-485	Multiplex	EUB0000328a	C[C@H](N(C(CN1C([C@]2(OC1=O)CCC3=CC(NC(NC)=O)=CC=C23)=O)=O)CC4=CC=C(F)C=C4)C(F)(F)F	Chemogenomic candidate	1	12	human fibroblast	2	855181	99	0.494949	0.505051	1	0.24	0.66	0.1	0	0.666667	0.25	0.333333	84.3333	0.520833	0.311795	0.58592	0.102285	0.479167	0.125354	0.149616	0.0949875	7.64557e+11	tag healthy nuclei < 50 %, tag tubulin effect > 50 %
A-485	Multiplex	EUB0000328a	C[C@H](N(C(CN1C([C@]2(OC1=O)CCC3=CC(NC(NC)=O)=CC=C23)=O)=O)CC4=CC=C(F)C=C4)C(F)(F)F	Chemogenomic candidate	1	12	U2OS	2	0.157147	82	0.0609756	0.939024	0.2	0.766234	0.103896	0.12987	0.8	0.372881	0.237288	0.644068	139.167	0.248909	0.881032	0.0702926	0.0486752	0.751091	0.279715	0.240817	0.0972624	1.01342	tag membrane permeabilized > 50 %
A-485	Multiplex	EUB0000328a	C[C@H](N(C(CN1C([C@]2(OC1=O)CCC3=CC(NC(NC)=O)=CC=C23)=O)=O)CC4=CC=C(F)C=C4)C(F)(F)F	Chemogenomic candidate	1	12	HEK293T	1	0.321217	630	0.163492	0.836508	0.157143	0.552182	0.182163	0.265655	0.842857	0.522337	0.0859107	0.281787	691.5	0.185934	0.698273	0.149796	0.151931	0.814066	0.0267306	0.0412745	0.044192	1.10218	tag tubulin effect > 50 %
A-485	Multiplex	EUB0000328a	C[C@H](N(C(CN1C([C@]2(OC1=O)CCC3=CC(NC(NC)=O)=CC=C23)=O)=O)CC4=CC=C(F)C=C4)C(F)(F)F	Chemogenomic candidate	1	12	HEK293T	2	0.5555	1495	0.0220736	0.977926	0.0687023	0.855677	0.0547196	0.0896033	0.931298	0.790568	0.200639	0.207834	1765.83	0.0828653	0.866876	0.0909282	0.0421957	0.917135	0.0464362	0.0760075	0.0151675	0.999314	tag tubulin effect > 50 %
A-485	Multiplex	EUB0000328a	C[C@H](N(C(CN1C([C@]2(OC1=O)CCC3=CC(NC(NC)=O)=CC=C23)=O)=O)CC4=CC=C(F)C=C4)C(F)(F)F	Chemogenomic candidate	1	24	HEK293T	2	0.399901	1741	0.0591614	0.940839	0.104478	0.813187	0.14591	0.0409035	0.895522	0.837087	0.0938438	0.165916	3025.33	0.160951	0.737455	0.183731	0.0788139	0.839049	0.452063	0.229554	0.0699568	0.474195	tag tubulin effect > 50 %
A-485	Multiplex	EUB0000328a	C[C@H](N(C(CN1C([C@]2(OC1=O)CCC3=CC(NC(NC)=O)=CC=C23)=O)=O)CC4=CC=C(F)C=C4)C(F)(F)F	Chemogenomic candidate	1	24	HEK293T	1	0.142897	539	0.118738	0.881262	0.213483	0.627368	0.185263	0.187368	0.786517	0.748322	0.154362	0.144295	838.25	0.154355	0.792279	0.137252	0.0704688	0.845645	0.0333863	0.0308318	0.0797788	1.0151	tag tubulin effect > 50 %
A-485	Multiplex	EUB0000328a	C[C@H](N(C(CN1C([C@]2(OC1=O)CCC3=CC(NC(NC)=O)=CC=C23)=O)=O)CC4=CC=C(F)C=C4)C(F)(F)F	Chemogenomic candidate	1	12	U2OS	1	0.657071	185	0.0432432	0.956757	0.3	0.915254	0.0282486	0.0564972	0.7	0.58642	0.141975	0.660494	199.167	0.369403	0.889153	0.0559111	0.0549359	0.630597	0.260916	0.219385	0.107163	1.00798	tag tubulin effect > 50 %, tag membrane permeabilized > 50 %
A-485	Multiplex	EUB0000328a	C[C@H](N(C(CN1C([C@]2(OC1=O)CCC3=CC(NC(NC)=O)=CC=C23)=O)=O)CC4=CC=C(F)C=C4)C(F)(F)F	Chemogenomic candidate	1	24	U2OS	1	0.563854	230	0.00869565	0.991304	0.0666667	0.881579	0.0526316	0.0657895	0.933333	0.223881	0.109453	0.248756	276.667	0.370298	0.917275	0.0423433	0.0403816	0.629702	0.31212	0.21103	0.0682442	1.0014
A-485	Multiplex	EUB0000328a	C[C@H](N(C(CN1C([C@]2(OC1=O)CCC3=CC(NC(NC)=O)=CC=C23)=O)=O)CC4=CC=C(F)C=C4)C(F)(F)F	Chemogenomic candidate	1	12	U2OS	2	0.534912	103	0.0873786	0.912621	0	0.882979	0.0744681	0.0425532	1	0.0963855	0.228916	0.204819	139.167	0.248909	0.881032	0.0702926	0.0486752	0.751091	0.279715	0.240817	0.0972624	1.01342
A-485	Multiplex	EUB0000328a	C[C@H](N(C(CN1C([C@]2(OC1=O)CCC3=CC(NC(NC)=O)=CC=C23)=O)=O)CC4=CC=C(F)C=C4)C(F)(F)F	Chemogenomic candidate	1	12	human fibroblast	1	-0.0607984	243	0.0823045	0.917695	0.5	0.591928	0.174888	0.233184	0.5	0.378788	0.0909091	0.189394	230.667	0.695283	0.596796	0.258529	0.144676	0.304717	0.0342007	0.0357415	0.0583164	1.23771
A-485	Multiplex	EUB0000328a	C[C@H](N(C(CN1C([C@]2(OC1=O)CCC3=CC(NC(NC)=O)=CC=C23)=O)=O)CC4=CC=C(F)C=C4)C(F)(F)F	Chemogenomic candidate	1	24	human fibroblast	1	0.370443	251	0.0916335	0.908367	0.731707	0.649123	0.171053	0.179825	0.268293	0.425676	0.141892	0.175676	242.833	0.651394	0.612787	0.255064	0.132149	0.348606	0.025027	0.0173706	0.0467803	1.19614
A-485	Multiplex	EUB0000328a	C[C@H](N(C(CN1C([C@]2(OC1=O)CCC3=CC(NC(NC)=O)=CC=C23)=O)=O)CC4=CC=C(F)C=C4)C(F)(F)F	Chemogenomic candidate	1	24	U2OS	2	0.52186	114	0.0614035	0.938596	0.357143	0.775701	0.0934579	0.130841	0.642857	0.13253	0.192771	0.144578	178.5	0.310463	0.888541	0.0624047	0.049054	0.689537	0.288716	0.291394	0.0647451	1.00514
A-485	Multiplex	EUB0000328a	C[C@H](N(C(CN1C([C@]2(OC1=O)CCC3=CC(NC(NC)=O)=CC=C23)=O)=O)CC4=CC=C(F)C=C4)C(F)(F)F	Chemogenomic candidate	1	12	U2OS	1	0.624602	139	0.0431655	0.956835	0.625	0.857143	0.0827068	0.0601504	0.375	0.201754	0.166667	0.140351	199.167	0.369403	0.889153	0.0559111	0.0549359	0.630597	0.260916	0.219385	0.107163	1.00798
A-485	Multiplex	EUB0000328a	C[C@H](N(C(CN1C([C@]2(OC1=O)CCC3=CC(NC(NC)=O)=CC=C23)=O)=O)CC4=CC=C(F)C=C4)C(F)(F)F	Chemogenomic candidate	1	24	U2OS	1	0.85057	188	0.0212766	0.978723	0.333333	0.902174	0.048913	0.048913	0.666667	0.289157	0.114458	0.13253	276.667	0.370298	0.917275	0.0423433	0.0403816	0.629702	0.31212	0.21103	0.0682442	1.0014
A-485	Multiplex	EUB0000328a	C[C@H](N(C(CN1C([C@]2(OC1=O)CCC3=CC(NC(NC)=O)=CC=C23)=O)=O)CC4=CC=C(F)C=C4)C(F)(F)F	Chemogenomic candidate	1	24	U2OS	2	0.893107	147	0.115646	0.884354	0.666667	0.946154	0.0307692	0.0230769	0.333333	0.113821	0.186992	0.113821	178.5	0.310463	0.888541	0.0624047	0.049054	0.689537	0.288716	0.291394	0.0647451	1.00514
A-485	Multiplex	EUB0000328a	C[C@H](N(C(CN1C([C@]2(OC1=O)CCC3=CC(NC(NC)=O)=CC=C23)=O)=O)CC4=CC=C(F)C=C4)C(F)(F)F	Chemogenomic candidate	1	24	human fibroblast	1	0.0296596	207	0.111111	0.888889	0.484848	0.592391	0.228261	0.179348	0.515152	0.0917431	0.0366972	0.110092	242.833	0.651394	0.612787	0.255064	0.132149	0.348606	0.025027	0.0173706	0.0467803	1.19614
A-485	Multiplex	EUB0000328a	C[C@H](N(C(CN1C([C@]2(OC1=O)CCC3=CC(NC(NC)=O)=CC=C23)=O)=O)CC4=CC=C(F)C=C4)C(F)(F)F	Chemogenomic candidate	1	24	HEK293T	2	0.830478	2832	0.0307203	0.96928	0.0454545	0.726047	0.249909	0.0240437	0.954545	0.174611	0.0210738	0.104867	3025.33	0.160951	0.737455	0.183731	0.0788139	0.839049	0.452063	0.229554	0.0699568	0.474195
A-485	Multiplex	EUB0000328a	C[C@H](N(C(CN1C([C@]2(OC1=O)CCC3=CC(NC(NC)=O)=CC=C23)=O)=O)CC4=CC=C(F)C=C4)C(F)(F)F	Chemogenomic candidate	1	24	HEK293T	1	0.949779	610	0.165574	0.834426	0.255814	0.734774	0.180747	0.0844794	0.744186	0.171123	0.0641711	0.0935829	838.25	0.154355	0.792279	0.137252	0.0704688	0.845645	0.0333863	0.0308318	0.0797788	1.0151
A-485	Multiplex	EUB0000328a	C[C@H](N(C(CN1C([C@]2(OC1=O)CCC3=CC(NC(NC)=O)=CC=C23)=O)=O)CC4=CC=C(F)C=C4)C(F)(F)F	Chemogenomic candidate	1	0	U2OS	1	0	113	0.0353982	0.964602	0.5	0.87156	0.0550459	0.0733945	0.5	0.263158	0.115789	0.0842105	156.5	0.597808	0.882455	0.0611652	0.0563801	0.402192	0.271242	0.126392	0.10096	0
A-485	Multiplex	EUB0000328a	C[C@H](N(C(CN1C([C@]2(OC1=O)CCC3=CC(NC(NC)=O)=CC=C23)=O)=O)CC4=CC=C(F)C=C4)C(F)(F)F	Chemogenomic candidate	1	12	HEK293T	1	0.833687	586	0.232082	0.767918	0.301075	0.566667	0.226667	0.206667	0.698925	0.0862745	0.0745098	0.0705882	691.5	0.185934	0.698273	0.149796	0.151931	0.814066	0.0267306	0.0412745	0.044192	1.10218
A-485	Multiplex	EUB0000328a	C[C@H](N(C(CN1C([C@]2(OC1=O)CCC3=CC(NC(NC)=O)=CC=C23)=O)=O)CC4=CC=C(F)C=C4)C(F)(F)F	Chemogenomic candidate	1	0	U2OS	1	0	149	0.0268456	0.973154	1	0.924138	0.0551724	0.0206897	0	0.30597	0.141791	0.0447761	156.5	0.597808	0.882455	0.0611652	0.0563801	0.402192	0.271242	0.126392	0.10096	0
A-485	Multiplex	EUB0000328a	C[C@H](N(C(CN1C([C@]2(OC1=O)CCC3=CC(NC(NC)=O)=CC=C23)=O)=O)CC4=CC=C(F)C=C4)C(F)(F)F	Chemogenomic candidate	1	12	HEK293T	2	0.839329	1775	0.0214085	0.978592	0.12987	0.872193	0.0834773	0.0443293	0.87013	0.147855	0.0937294	0.0409241	1765.83	0.0828653	0.866876	0.0909282	0.0421957	0.917135	0.0464362	0.0760075	0.0151675	0.999314
A-485	Multiplex	EUB0000328a	C[C@H](N(C(CN1C([C@]2(OC1=O)CCC3=CC(NC(NC)=O)=CC=C23)=O)=O)CC4=CC=C(F)C=C4)C(F)(F)F	Chemogenomic candidate	1	0	human fibroblast	1	0	273	0.0659341	0.934066	0.767442	0.576471	0.254902	0.168627	0.232558	0.00680272	0.0612245	0.0408163	211.75	0.805591	0.539397	0.278942	0.181661	0.194409	0.021052	0.100182	0.0283348	#DIV/0!
A-485	Multiplex	EUB0000328a	C[C@H](N(C(CN1C([C@]2(OC1=O)CCC3=CC(NC(NC)=O)=CC=C23)=O)=O)CC4=CC=C(F)C=C4)C(F)(F)F	Chemogenomic candidate	1	0	U2OS	2	0	79	0.253165	0.746835	1	0.915254	0.0677966	0.0169492	0	0.333333	0.259259	0.037037	99.3333	#DIV/0!	0.877466	0.0854137	0.0371199	#DIV/0!	0.27287	0.183282	0.0858335	0
A-485	Multiplex	EUB0000328a	C[C@H](N(C(CN1C([C@]2(OC1=O)CCC3=CC(NC(NC)=O)=CC=C23)=O)=O)CC4=CC=C(F)C=C4)C(F)(F)F	Chemogenomic candidate	1	12	human fibroblast	1	0.551891	214	0.0934579	0.906542	0.769231	0.618557	0.247423	0.134021	0.230769	0.0833333	0.0166667	0.0333333	230.667	0.695283	0.596796	0.258529	0.144676	0.304717	0.0342007	0.0357415	0.0583164	1.23771
A-485	Multiplex	EUB0000328a	C[C@H](N(C(CN1C([C@]2(OC1=O)CCC3=CC(NC(NC)=O)=CC=C23)=O)=O)CC4=CC=C(F)C=C4)C(F)(F)F	Chemogenomic candidate	1	0	U2OS	2	0	88	0.204545	0.795455	1	0.914286	0.0714286	0.0142857	0	0.140625	0.15625	0.03125	99.3333	#DIV/0!	0.877466	0.0854137	0.0371199	#DIV/0!	0.27287	0.183282	0.0858335	0
A-485	Multiplex	EUB0000328a	C[C@H](N(C(CN1C([C@]2(OC1=O)CCC3=CC(NC(NC)=O)=CC=C23)=O)=O)CC4=CC=C(F)C=C4)C(F)(F)F	Chemogenomic candidate	1	0	human fibroblast	1	0	260	0.0807692	0.919231	0.880952	0.610879	0.213389	0.175732	0.119048	0.0136986	0.0821918	0.0136986	211.75	0.805591	0.539397	0.278942	0.181661	0.194409	0.021052	0.100182	0.0283348	#DIV/0!
A-485	Multiplex	EUB0000328a	C[C@H](N(C(CN1C([C@]2(OC1=O)CCC3=CC(NC(NC)=O)=CC=C23)=O)=O)CC4=CC=C(F)C=C4)C(F)(F)F	Chemogenomic candidate	1	0	HEK293T	2	0	1075	0.0232558	0.976744	0.112583	0.809524	0.0466667	0.14381	0.887417	0.00470588	0.295294	0.00117647	1080.25	0.142406	0.776982	0.0533037	0.169714	0.857594	0.00453037	0.323128	0.00113292	#DIV/0!
A-485	Multiplex	EUB0000328a	C[C@H](N(C(CN1C([C@]2(OC1=O)CCC3=CC(NC(NC)=O)=CC=C23)=O)=O)CC4=CC=C(F)C=C4)C(F)(F)F	Chemogenomic candidate	1	0	HEK293T	2	0	1120	0.0169643	0.983036	0.121387	0.807448	0.0354223	0.15713	0.878613	0	0.31946	0.00112486	1080.25	0.142406	0.776982	0.0533037	0.169714	0.857594	0.00453037	0.323128	0.00113292	#DIV/0!
A-486	Multiplex	EUB0000326a	C[C@H](N(C(CN1C([C@]2(OC1=O)CCC3=C2C=C(NC(NC)=O)C=C3)=O)=O)CC4=CC=C(F)C=C4)C(F)(F)F	Chemogenomic candidate	10	24	human fibroblast	2	-0.757545	81	0.382716	0.617284	1	0.4	0.56	0.04	0	0.1	0	0.25	80.0833	0.552381	0.346171	0.555718	0.0981105	0.447619	0.11087	0.120814	0.103	231110	tag healthy nuclei < 50 %
A-486	Multiplex	EUB0000326a	C[C@H](N(C(CN1C([C@]2(OC1=O)CCC3=C2C=C(NC(NC)=O)C=C3)=O)=O)CC4=CC=C(F)C=C4)C(F)(F)F	Chemogenomic candidate	1	12	HEK293T	1	-0.462935	632	0.150316	0.849684	0.252632	0.472998	0.173184	0.353818	0.747368	0.484252	0.153543	0.173228	691.5	0.185934	0.698273	0.149796	0.151931	0.814066	0.0267306	0.0412745	0.044192	1.10218	tag healthy nuclei < 50 %
A-486	Multiplex	EUB0000326a	C[C@H](N(C(CN1C([C@]2(OC1=O)CCC3=C2C=C(NC(NC)=O)C=C3)=O)=O)CC4=CC=C(F)C=C4)C(F)(F)F	Chemogenomic candidate	10	12	human fibroblast	2	9.14057	77	0.298701	0.701299	0.333333	0.37037	0.574074	0.0555556	0.666667	0.45	0.1	0.15	84.3333	0.520833	0.311795	0.58592	0.102285	0.479167	0.125354	0.149616	0.0949875	7.64557e+11	tag healthy nuclei < 50 %
A-486	Multiplex	EUB0000326a	C[C@H](N(C(CN1C([C@]2(OC1=O)CCC3=C2C=C(NC(NC)=O)C=C3)=O)=O)CC4=CC=C(F)C=C4)C(F)(F)F	Chemogenomic candidate	1	0	human fibroblast	2	0	68	0.294118	0.705882	0.727273	0.291667	0.479167	0.229167	0.272727	0.214286	0.214286	0.142857	99.3333	0.557903	0.293865	0.595118	0.111016	0.442097	0.112114	0.290215	0.0427216	#DIV/0!	tag healthy nuclei < 50 %
A-486	Multiplex	EUB0000326a	C[C@H](N(C(CN1C([C@]2(OC1=O)CCC3=C2C=C(NC(NC)=O)C=C3)=O)=O)CC4=CC=C(F)C=C4)C(F)(F)F	Chemogenomic candidate	10	0	human fibroblast	2	0	108	0.37963	0.62037	0.4	0.313433	0.61194	0.0746269	0.6	0.238095	0.47619	0.0952381	99.3333	0.557903	0.293865	0.595118	0.111016	0.442097	0.112114	0.290215	0.0427216	#DIV/0!	tag healthy nuclei < 50 %
A-486	Multiplex	EUB0000326a	C[C@H](N(C(CN1C([C@]2(OC1=O)CCC3=C2C=C(NC(NC)=O)C=C3)=O)=O)CC4=CC=C(F)C=C4)C(F)(F)F	Chemogenomic candidate	10	0	HEK293T	1	0	1022	0.270687	0.729313	0.137255	0.45	0.255769	0.294231	0.862745	0.00854701	0.183761	0.0512821	865.667	0.13691	0.491163	0.230041	0.278796	0.86309	0.0185405	0.129798	0.0320833	#DIV/0!	tag healthy nuclei < 50 %
A-486	Multiplex	EUB0000326a	C[C@H](N(C(CN1C([C@]2(OC1=O)CCC3=C2C=C(NC(NC)=O)C=C3)=O)=O)CC4=CC=C(F)C=C4)C(F)(F)F	Chemogenomic candidate	1	0	HEK293T	1	0	867	0.26392	0.73608	0.193182	0.473525	0.260212	0.266263	0.806818	0.0191693	0.188498	0.0415335	865.667	0.13691	0.491163	0.230041	0.278796	0.86309	0.0185405	0.129798	0.0320833	#DIV/0!	tag healthy nuclei < 50 %
A-486	Multiplex	EUB0000326a	C[C@H](N(C(CN1C([C@]2(OC1=O)CCC3=C2C=C(NC(NC)=O)C=C3)=O)=O)CC4=CC=C(F)C=C4)C(F)(F)F	Chemogenomic candidate	1	24	human fibroblast	2	-0.98863	78	0.333333	0.666667	0.714286	0.230769	0.634615	0.134615	0.285714	0.666667	0.166667	0.5	80.0833	0.552381	0.346171	0.555718	0.0981105	0.447619	0.11087	0.120814	0.103	231110	tag healthy nuclei < 50 %, tag tubulin effect > 50 %
A-486	Multiplex	EUB0000326a	C[C@H](N(C(CN1C([C@]2(OC1=O)CCC3=C2C=C(NC(NC)=O)C=C3)=O)=O)CC4=CC=C(F)C=C4)C(F)(F)F	Chemogenomic candidate	1	12	human fibroblast	2	1507.75	87	0.344828	0.655172	0.75	0.210526	0.578947	0.210526	0.25	0.916667	0.0833333	0.416667	84.3333	0.520833	0.311795	0.58592	0.102285	0.479167	0.125354	0.149616	0.0949875	7.64557e+11	tag healthy nuclei < 50 %, tag tubulin effect > 50 %
A-486	Multiplex	EUB0000326a	C[C@H](N(C(CN1C([C@]2(OC1=O)CCC3=C2C=C(NC(NC)=O)C=C3)=O)=O)CC4=CC=C(F)C=C4)C(F)(F)F	Chemogenomic candidate	1	24	HEK293T	2	0.725056	1891	0.0370175	0.962983	0.0654206	0.799561	0.14168	0.0587589	0.934579	0.894231	0.105769	0.362637	3025.33	0.160951	0.737455	0.183731	0.0788139	0.839049	0.452063	0.229554	0.0699568	0.474195	tag tubulin effect > 50 %
A-486	Multiplex	EUB0000326a	C[C@H](N(C(CN1C([C@]2(OC1=O)CCC3=C2C=C(NC(NC)=O)C=C3)=O)=O)CC4=CC=C(F)C=C4)C(F)(F)F	Chemogenomic candidate	1	12	human fibroblast	1	-0.120457	291	0.0927835	0.907216	0.6875	0.606061	0.212121	0.181818	0.3125	0.55625	0.04375	0.31875	230.667	0.695283	0.596796	0.258529	0.144676	0.304717	0.0342007	0.0357415	0.0583164	1.23771	tag tubulin effect > 50 %
A-486	Multiplex	EUB0000326a	C[C@H](N(C(CN1C([C@]2(OC1=O)CCC3=C2C=C(NC(NC)=O)C=C3)=O)=O)CC4=CC=C(F)C=C4)C(F)(F)F	Chemogenomic candidate	1	12	HEK293T	2	0.595695	1325	0.0264151	0.973585	0.123529	0.820155	0.048062	0.131783	0.876471	0.883743	0.214556	0.298677	1765.83	0.0828653	0.866876	0.0909282	0.0421957	0.917135	0.0464362	0.0760075	0.0151675	0.999314	tag tubulin effect > 50 %
A-486	Multiplex	EUB0000326a	C[C@H](N(C(CN1C([C@]2(OC1=O)CCC3=C2C=C(NC(NC)=O)C=C3)=O)=O)CC4=CC=C(F)C=C4)C(F)(F)F	Chemogenomic candidate	1	24	HEK293T	1	0.481048	669	0.100149	0.899851	0.241379	0.734219	0.121262	0.144518	0.758621	0.678733	0.11991	0.257919	838.25	0.154355	0.792279	0.137252	0.0704688	0.845645	0.0333863	0.0308318	0.0797788	1.0151	tag tubulin effect > 50 %
A-486	Multiplex	EUB0000326a	C[C@H](N(C(CN1C([C@]2(OC1=O)CCC3=C2C=C(NC(NC)=O)C=C3)=O)=O)CC4=CC=C(F)C=C4)C(F)(F)F	Chemogenomic candidate	1	12	U2OS	1	0.0727553	248	0.0443548	0.955645	0.470588	0.810127	0.0464135	0.14346	0.529412	0.578125	0.119792	0.635417	199.167	0.369403	0.889153	0.0559111	0.0549359	0.630597	0.260916	0.219385	0.107163	1.00798	tag tubulin effect > 50 %, tag membrane permeabilized > 50 %
A-486	Multiplex	EUB0000326a	C[C@H](N(C(CN1C([C@]2(OC1=O)CCC3=C2C=C(NC(NC)=O)C=C3)=O)=O)CC4=CC=C(F)C=C4)C(F)(F)F	Chemogenomic candidate	1	12	U2OS	2	0.628444	105	0.114286	0.885714	0.75	0.88172	0.0752688	0.0430108	0.25	0.609756	0.195122	0.597561	139.167	0.248909	0.881032	0.0702926	0.0486752	0.751091	0.279715	0.240817	0.0972624	1.01342	tag tubulin effect > 50 %, tag membrane permeabilized > 50 %
A-486	Multiplex	EUB0000326a	C[C@H](N(C(CN1C([C@]2(OC1=O)CCC3=C2C=C(NC(NC)=O)C=C3)=O)=O)CC4=CC=C(F)C=C4)C(F)(F)F	Chemogenomic candidate	1	24	U2OS	1	0.579232	329	0.0425532	0.957447	0.333333	0.898413	0.0349206	0.0666667	0.666667	0.300353	0.141343	0.452297	276.667	0.370298	0.917275	0.0423433	0.0403816	0.629702	0.31212	0.21103	0.0682442	1.0014
A-486	Multiplex	EUB0000326a	C[C@H](N(C(CN1C([C@]2(OC1=O)CCC3=C2C=C(NC(NC)=O)C=C3)=O)=O)CC4=CC=C(F)C=C4)C(F)(F)F	Chemogenomic candidate	1	24	U2OS	2	0.525677	115	0.0782609	0.921739	0.75	0.886792	0.0754717	0.0377358	0.25	0.276596	0.180851	0.446809	178.5	0.310463	0.888541	0.0624047	0.049054	0.689537	0.288716	0.291394	0.0647451	1.00514
A-486	Multiplex	EUB0000326a	C[C@H](N(C(CN1C([C@]2(OC1=O)CCC3=C2C=C(NC(NC)=O)C=C3)=O)=O)CC4=CC=C(F)C=C4)C(F)(F)F	Chemogenomic candidate	10	12	U2OS	2	0.527562	102	0.117647	0.882353	0.333333	0.833333	0.0666667	0.1	0.666667	0.28	0.266667	0.213333	139.167	0.248909	0.881032	0.0702926	0.0486752	0.751091	0.279715	0.240817	0.0972624	1.01342
A-486	Multiplex	EUB0000326a	C[C@H](N(C(CN1C([C@]2(OC1=O)CCC3=C2C=C(NC(NC)=O)C=C3)=O)=O)CC4=CC=C(F)C=C4)C(F)(F)F	Chemogenomic candidate	1	24	human fibroblast	1	-0.229139	300	0.143333	0.856667	0.568182	0.59144	0.237354	0.171206	0.431818	0.467105	0.0657895	0.171053	242.833	0.651394	0.612787	0.255064	0.132149	0.348606	0.025027	0.0173706	0.0467803	1.19614
A-486	Multiplex	EUB0000326a	C[C@H](N(C(CN1C([C@]2(OC1=O)CCC3=C2C=C(NC(NC)=O)C=C3)=O)=O)CC4=CC=C(F)C=C4)C(F)(F)F	Chemogenomic candidate	10	24	U2OS	2	0.752473	126	0.0952381	0.904762	0.4	0.903509	0.0526316	0.0438596	0.6	0.378641	0.330097	0.145631	178.5	0.310463	0.888541	0.0624047	0.049054	0.689537	0.288716	0.291394	0.0647451	1.00514
A-486	Multiplex	EUB0000326a	C[C@H](N(C(CN1C([C@]2(OC1=O)CCC3=C2C=C(NC(NC)=O)C=C3)=O)=O)CC4=CC=C(F)C=C4)C(F)(F)F	Chemogenomic candidate	1	0	U2OS	1	0	220	0.0545455	0.945455	0.666667	0.899038	0.0432692	0.0576923	0.333333	0.224599	0.0641711	0.13369	156.5	0.597808	0.882455	0.0611652	0.0563801	0.402192	0.271242	0.126392	0.10096	0
A-486	Multiplex	EUB0000326a	C[C@H](N(C(CN1C([C@]2(OC1=O)CCC3=C2C=C(NC(NC)=O)C=C3)=O)=O)CC4=CC=C(F)C=C4)C(F)(F)F	Chemogenomic candidate	10	24	human fibroblast	1	0.810663	177	0.141243	0.858757	0.608696	0.539474	0.309211	0.151316	0.391304	0.0853659	0.0121951	0.121951	242.833	0.651394	0.612787	0.255064	0.132149	0.348606	0.025027	0.0173706	0.0467803	1.19614
A-486	Multiplex	EUB0000326a	C[C@H](N(C(CN1C([C@]2(OC1=O)CCC3=C2C=C(NC(NC)=O)C=C3)=O)=O)CC4=CC=C(F)C=C4)C(F)(F)F	Chemogenomic candidate	10	0	U2OS	2	0	83	0.180723	0.819277	#DIV/0!	0.852941	0.147059	0	#DIV/0!	0.293103	0.189655	0.12069	99.3333	#DIV/0!	0.877466	0.0854137	0.0371199	#DIV/0!	0.27287	0.183282	0.0858335	0
A-486	Multiplex	EUB0000326a	C[C@H](N(C(CN1C([C@]2(OC1=O)CCC3=C2C=C(NC(NC)=O)C=C3)=O)=O)CC4=CC=C(F)C=C4)C(F)(F)F	Chemogenomic candidate	10	12	U2OS	1	0.392439	201	0.00995025	0.99005	0.272727	0.859296	0.0301508	0.110553	0.727273	0.122807	0.192982	0.0994152	199.167	0.369403	0.889153	0.0559111	0.0549359	0.630597	0.260916	0.219385	0.107163	1.00798
A-486	Multiplex	EUB0000326a	C[C@H](N(C(CN1C([C@]2(OC1=O)CCC3=C2C=C(NC(NC)=O)C=C3)=O)=O)CC4=CC=C(F)C=C4)C(F)(F)F	Chemogenomic candidate	1	0	U2OS	2	0	83	0.168675	0.831325	0.666667	0.884058	0.0724638	0.0434783	0.333333	0.229508	0.163934	0.0983607	99.3333	#DIV/0!	0.877466	0.0854137	0.0371199	#DIV/0!	0.27287	0.183282	0.0858335	0
A-486	Multiplex	EUB0000326a	C[C@H](N(C(CN1C([C@]2(OC1=O)CCC3=C2C=C(NC(NC)=O)C=C3)=O)=O)CC4=CC=C(F)C=C4)C(F)(F)F	Chemogenomic candidate	10	24	HEK293T	1	0.720758	551	0.092559	0.907441	0.333333	0.754	0.15	0.096	0.666667	0.100796	0.0424403	0.0875332	838.25	0.154355	0.792279	0.137252	0.0704688	0.845645	0.0333863	0.0308318	0.0797788	1.0151
A-486	Multiplex	EUB0000326a	C[C@H](N(C(CN1C([C@]2(OC1=O)CCC3=C2C=C(NC(NC)=O)C=C3)=O)=O)CC4=CC=C(F)C=C4)C(F)(F)F	Chemogenomic candidate	10	0	U2OS	1	0	176	0.0227273	0.977273	0.545455	0.877907	0.0581395	0.0639535	0.454545	0.218543	0.10596	0.0860927	156.5	0.597808	0.882455	0.0611652	0.0563801	0.402192	0.271242	0.126392	0.10096	0
A-486	Multiplex	EUB0000326a	C[C@H](N(C(CN1C([C@]2(OC1=O)CCC3=C2C=C(NC(NC)=O)C=C3)=O)=O)CC4=CC=C(F)C=C4)C(F)(F)F	Chemogenomic candidate	10	24	HEK293T	2	0.952399	3041	0.0282802	0.97172	0.0701754	0.723519	0.257191	0.0192893	0.929825	0.135173	0.0219832	0.0781104	3025.33	0.160951	0.737455	0.183731	0.0788139	0.839049	0.452063	0.229554	0.0699568	0.474195
A-486	Multiplex	EUB0000326a	C[C@H](N(C(CN1C([C@]2(OC1=O)CCC3=C2C=C(NC(NC)=O)C=C3)=O)=O)CC4=CC=C(F)C=C4)C(F)(F)F	Chemogenomic candidate	10	12	HEK293T	1	0.118874	510	0.170588	0.829412	0.147368	0.574468	0.200946	0.224586	0.852632	0.0493827	0.0658436	0.0740741	691.5	0.185934	0.698273	0.149796	0.151931	0.814066	0.0267306	0.0412745	0.044192	1.10218
A-486	Multiplex	EUB0000326a	C[C@H](N(C(CN1C([C@]2(OC1=O)CCC3=C2C=C(NC(NC)=O)C=C3)=O)=O)CC4=CC=C(F)C=C4)C(F)(F)F	Chemogenomic candidate	10	12	human fibroblast	1	1.41428	160	0.14375	0.85625	0.55	0.613139	0.240876	0.145985	0.45	0.0714286	0.0595238	0.0714286	230.667	0.695283	0.596796	0.258529	0.144676	0.304717	0.0342007	0.0357415	0.0583164	1.23771
A-486	Multiplex	EUB0000326a	C[C@H](N(C(CN1C([C@]2(OC1=O)CCC3=C2C=C(NC(NC)=O)C=C3)=O)=O)CC4=CC=C(F)C=C4)C(F)(F)F	Chemogenomic candidate	10	24	U2OS	1	0.77451	277	0.00361011	0.99639	0.466667	0.92029	0.0253623	0.0543478	0.533333	0.177165	0.141732	0.0511811	276.667	0.370298	0.917275	0.0423433	0.0403816	0.629702	0.31212	0.21103	0.0682442	1.0014
A-486	Multiplex	EUB0000326a	C[C@H](N(C(CN1C([C@]2(OC1=O)CCC3=C2C=C(NC(NC)=O)C=C3)=O)=O)CC4=CC=C(F)C=C4)C(F)(F)F	Chemogenomic candidate	1	0	human fibroblast	1	0	260	0.0807692	0.919231	0.745098	0.514644	0.271967	0.213389	0.254902	0.0162602	0.105691	0.0325203	211.75	0.805591	0.539397	0.278942	0.181661	0.194409	0.021052	0.100182	0.0283348	#DIV/0!
A-486	Multiplex	EUB0000326a	C[C@H](N(C(CN1C([C@]2(OC1=O)CCC3=C2C=C(NC(NC)=O)C=C3)=O)=O)CC4=CC=C(F)C=C4)C(F)(F)F	Chemogenomic candidate	10	0	human fibroblast	1	0	245	0.106122	0.893878	0.736842	0.589041	0.237443	0.173516	0.263158	0.00775194	0.0542636	0.0310078	211.75	0.805591	0.539397	0.278942	0.181661	0.194409	0.021052	0.100182	0.0283348	#DIV/0!
A-486	Multiplex	EUB0000326a	C[C@H](N(C(CN1C([C@]2(OC1=O)CCC3=C2C=C(NC(NC)=O)C=C3)=O)=O)CC4=CC=C(F)C=C4)C(F)(F)F	Chemogenomic candidate	10	12	HEK293T	2	0.865946	1787	0.0156687	0.984331	0.05	0.858442	0.0960773	0.0454804	0.95	0.135762	0.0834437	0.0231788	1765.83	0.0828653	0.866876	0.0909282	0.0421957	0.917135	0.0464362	0.0760075	0.0151675	0.999314
A-486	Multiplex	EUB0000326a	C[C@H](N(C(CN1C([C@]2(OC1=O)CCC3=C2C=C(NC(NC)=O)C=C3)=O)=O)CC4=CC=C(F)C=C4)C(F)(F)F	Chemogenomic candidate	10	0	HEK293T	2	0	1125	0.0266667	0.973333	0.104938	0.799087	0.052968	0.147945	0.895062	0.00228571	0.314286	0.00228571	1080.25	0.142406	0.776982	0.0533037	0.169714	0.857594	0.00453037	0.323128	0.00113292	#DIV/0!
A-486	Multiplex	EUB0000326a	C[C@H](N(C(CN1C([C@]2(OC1=O)CCC3=C2C=C(NC(NC)=O)C=C3)=O)=O)CC4=CC=C(F)C=C4)C(F)(F)F	Chemogenomic candidate	1	0	HEK293T	2	0	972	0.0288066	0.971193	0.113402	0.744703	0.0497881	0.205508	0.886598	0	0.291607	0.00142248	1080.25	0.142406	0.776982	0.0533037	0.169714	0.857594	0.00453037	0.323128	0.00113292	#DIV/0!
A-77636	Multiplex	EUB0000359aCl	[H]Cl.NC[C@@H]1O[C@H](C23CC4CC(C3)CC(C2)C4)CC5=C1C=CC(O)=C5O	Chemogenomic candidate	10	48	human fibroblast	1	2.99123	169	0.242604	0.757396	0.666667	0.4375	0.328125	0.234375	0.333333	0.464286	0.0535714	0.5	110.667	0.531499	0.514801	0.276708	0.208491	0.468501	0.298464	0.0241518	0.276892	5.201	tag healthy nuclei < 50 %
A-77636	Multiplex	EUB0000359aCl	[H]Cl.NC[C@@H]1O[C@H](C23CC4CC(C3)CC(C2)C4)CC5=C1C=CC(O)=C5O	Chemogenomic candidate	10	48	HEK293T	1	-0.451773	286	0.153846	0.846154	0.237805	0.107438	0.214876	0.677686	0.762195	0.461538	0	0.384615	351.333	0.392717	0.429172	0.195155	0.375673	0.607283	0.266274	0.27356	0.0493784	0.987254	tag healthy nuclei < 50 %
A-77636	Multiplex	EUB0000359aCl	[H]Cl.NC[C@@H]1O[C@H](C23CC4CC(C3)CC(C2)C4)CC5=C1C=CC(O)=C5O	Chemogenomic candidate	10	24	U2OS	2	-0.746591	80	0.1875	0.8125	0.923077	0.292308	0.507692	0.2	0.0769231	0.263158	0.263158	0.263158	102.167	0.521098	0.831195	0.0931875	0.0756178	0.478902	0.166245	0.0748286	0.0347485	1.01542	tag healthy nuclei < 50 %
A-77636	Multiplex	EUB0000359aCl	[H]Cl.NC[C@@H]1O[C@H](C23CC4CC(C3)CC(C2)C4)CC5=C1C=CC(O)=C5O	Chemogenomic candidate	10	24	human fibroblast	2	-0.746591	80	0.1875	0.8125	0.923077	0.292308	0.507692	0.2	0.0769231	0.263158	0.263158	0.263158	108.083	0.521098	0.831195	0.0931875	0.0756178	0.478902	0.166245	0.0748286	0.0347485	1.01542	tag healthy nuclei < 50 %
A-77636	Multiplex	EUB0000359aCl	[H]Cl.NC[C@@H]1O[C@H](C23CC4CC(C3)CC(C2)C4)CC5=C1C=CC(O)=C5O	Chemogenomic candidate	10	48	U2OS	1	0.078922	180	0.133333	0.866667	0.84	0.339744	0.339744	0.320513	0.16	0.377358	0.169811	0.207547	330	0.352767	0.881662	0.0538695	0.0644681	0.647233	0.102719	0.0952982	0.0225671	1.00252	tag healthy nuclei < 50 %
A-77636	Multiplex	EUB0000359aCl	[H]Cl.NC[C@@H]1O[C@H](C23CC4CC(C3)CC(C2)C4)CC5=C1C=CC(O)=C5O	Chemogenomic candidate	10	48	human fibroblast	2	0.902235	236	0.173729	0.826271	1	0.487179	0.502564	0.0102564	0	0.431579	0.0105263	0.147368	108	0.498611	0.755765	0.214424	0.0298114	0.501389	0.304063	0.0278827	0.153127	1.11404	tag healthy nuclei < 50 %
A-77636	Multiplex	EUB0000359aCl	[H]Cl.NC[C@@H]1O[C@H](C23CC4CC(C3)CC(C2)C4)CC5=C1C=CC(O)=C5O	Chemogenomic candidate	10	12	U2OS	2	-0.957941	76	0.105263	0.894737	0.526316	0.323529	0.397059	0.279412	0.473684	0.272727	0.227273	0.0909091	78.3333	0.502249	0.830741	0.0963907	0.0728682	0.497751	0.154861	0.0827165	0.0293447	1.11609	tag healthy nuclei < 50 %
A-77636	Multiplex	EUB0000359aCl	[H]Cl.NC[C@@H]1O[C@H](C23CC4CC(C3)CC(C2)C4)CC5=C1C=CC(O)=C5O	Chemogenomic candidate	10	12	human fibroblast	2	-0.957941	76	0.105263	0.894737	0.526316	0.323529	0.397059	0.279412	0.473684	0.272727	0.227273	0.0909091	106.333	0.502249	0.830741	0.0963907	0.0728682	0.497751	0.154861	0.0827165	0.0293447	1.11609	tag healthy nuclei < 50 %
A-77636	Multiplex	EUB0000359aCl	[H]Cl.NC[C@@H]1O[C@H](C23CC4CC(C3)CC(C2)C4)CC5=C1C=CC(O)=C5O	Chemogenomic candidate	1	12	HEK293T	2	0.544485	267	0.0224719	0.977528	0.0714286	0.478927	0.0383142	0.482759	0.928571	0.472	0.384	0.088	256.75	0.112092	0.454373	0.0637918	0.481836	0.887908	0.182057	0.132768	0.0724535	1.03765	tag healthy nuclei < 50 %
A-77636	Multiplex	EUB0000359aCl	[H]Cl.NC[C@@H]1O[C@H](C23CC4CC(C3)CC(C2)C4)CC5=C1C=CC(O)=C5O	Chemogenomic candidate	10	12	human fibroblast	1	3.14512	205	0.156098	0.843902	0.44898	0.421965	0.294798	0.283237	0.55102	0.465753	0.0958904	0.0821918	107.083	0.631736	0.44459	0.220734	0.334676	0.368264	0.315502	0.0769574	0.274792	1.29875	tag healthy nuclei < 50 %
A-77636	Multiplex	EUB0000359aCl	[H]Cl.NC[C@@H]1O[C@H](C23CC4CC(C3)CC(C2)C4)CC5=C1C=CC(O)=C5O	Chemogenomic candidate	10	24	U2OS	1	-0.566654	161	0.0621118	0.937888	0.761905	0.337748	0.384106	0.278146	0.238095	0.176471	0.0784314	0.0784314	212.417	0.319581	0.825187	0.0885786	0.0862345	0.680419	0.098522	0.0722682	0.0503222	0.99162	tag healthy nuclei < 50 %
A-77636	Multiplex	EUB0000359aCl	[H]Cl.NC[C@@H]1O[C@H](C23CC4CC(C3)CC(C2)C4)CC5=C1C=CC(O)=C5O	Chemogenomic candidate	10	0	human fibroblast	1	0	143	0.0629371	0.937063	0.730769	0.343284	0.268657	0.38806	0.269231	0.26087	0.23913	0.0652174	125.417	0.662404	0.310276	0.328567	0.361157	0.337596	0.203306	0.230525	0.0840641	#DIV/0!	tag healthy nuclei < 50 %
A-77636	Multiplex	EUB0000359aCl	[H]Cl.NC[C@@H]1O[C@H](C23CC4CC(C3)CC(C2)C4)CC5=C1C=CC(O)=C5O	Chemogenomic candidate	10	12	U2OS	1	-0.885265	150	0.08	0.92	0.372093	0.369565	0.318841	0.311594	0.627907	0.0588235	0.137255	0.0392157	165.75	0.37331	0.780206	0.114105	0.10569	0.62669	0.0951184	0.0845665	0.073208	1.05123	tag healthy nuclei < 50 %
A-77636	Multiplex	EUB0000359aCl	[H]Cl.NC[C@@H]1O[C@H](C23CC4CC(C3)CC(C2)C4)CC5=C1C=CC(O)=C5O	Chemogenomic candidate	1	0	HEK293T	2	0	268	0.0261194	0.973881	0.118343	0.298851	0.0536398	0.64751	0.881657	0.0384615	0.179487	0.025641	233.167	0.0929753	0.24237	0.0798532	0.677777	0.907025	0.0412417	0.171457	0.0110984	#DIV/0!	tag healthy nuclei < 50 %
A-77636	Multiplex	EUB0000359aCl	[H]Cl.NC[C@@H]1O[C@H](C23CC4CC(C3)CC(C2)C4)CC5=C1C=CC(O)=C5O	Chemogenomic candidate	1	0	human fibroblast	1	0	172	0.0755814	0.924419	0.729167	0.377358	0.320755	0.301887	0.270833	0.116667	0.166667	0.0166667	125.417	0.662404	0.310276	0.328567	0.361157	0.337596	0.203306	0.230525	0.0840641	#DIV/0!	tag healthy nuclei < 50 %
A-77636	Multiplex	EUB0000359aCl	[H]Cl.NC[C@@H]1O[C@H](C23CC4CC(C3)CC(C2)C4)CC5=C1C=CC(O)=C5O	Chemogenomic candidate	10	0	HEK293T	2	0	230	0.0434783	0.956522	0.0935252	0.259091	0.109091	0.631818	0.906475	0.0350877	0.192982	0	233.167	0.0929753	0.24237	0.0798532	0.677777	0.907025	0.0412417	0.171457	0.0110984	#DIV/0!	tag healthy nuclei < 50 %
A-77636	Multiplex	EUB0000359aCl	[H]Cl.NC[C@@H]1O[C@H](C23CC4CC(C3)CC(C2)C4)CC5=C1C=CC(O)=C5O	Chemogenomic candidate	10	12	HEK293T	2	-0.780496	204	0.112745	0.887255	0.378205	0.0607735	0.0773481	0.861878	0.621795	0.272727	0.545455	0.0909091	256.75	0.112092	0.454373	0.0637918	0.481836	0.887908	0.182057	0.132768	0.0724535	1.03765	tag healthy nuclei < 50 %, tag mitochondrial mass > 50 %
A-77636	Multiplex	EUB0000359aCl	[H]Cl.NC[C@@H]1O[C@H](C23CC4CC(C3)CC(C2)C4)CC5=C1C=CC(O)=C5O	Chemogenomic candidate	10	0	HEK293T	1	0	251	0.10757	0.89243	0.358025	0.191964	0.0848214	0.723214	0.641975	0.0232558	0.813953	0	256.5	0.333294	0.212413	0.0958204	0.691766	0.666706	0.0141172	0.774309	0.00115741	#DIV/0!	tag healthy nuclei < 50 %, tag mitochondrial mass > 50 %
A-77636	Multiplex	EUB0000359aCl	[H]Cl.NC[C@@H]1O[C@H](C23CC4CC(C3)CC(C2)C4)CC5=C1C=CC(O)=C5O	Chemogenomic candidate	1	0	HEK293T	1	0	311	0.144695	0.855305	0.489933	0.327068	0.112782	0.56015	0.510067	0.0229885	0.747126	0	256.5	0.333294	0.212413	0.0958204	0.691766	0.666706	0.0141172	0.774309	0.00115741	#DIV/0!	tag healthy nuclei < 50 %, tag mitochondrial mass > 50 %
A-77636	Multiplex	EUB0000359aCl	[H]Cl.NC[C@@H]1O[C@H](C23CC4CC(C3)CC(C2)C4)CC5=C1C=CC(O)=C5O	Chemogenomic candidate	10	24	HEK293T	2	-0.344568	205	0.156098	0.843902	0.393939	0.144509	0.0924855	0.763006	0.606061	0.76	0.12	0.32	322.417	0.125402	0.652444	0.053119	0.294437	0.874598	0.274867	0.112063	0.0970907	1.01358	tag healthy nuclei < 50 %, tag tubulin effect > 50 %
A-77636	Multiplex	EUB0000359aCl	[H]Cl.NC[C@@H]1O[C@H](C23CC4CC(C3)CC(C2)C4)CC5=C1C=CC(O)=C5O	Chemogenomic candidate	10	48	HEK293T	2	-0.113168	190	0.163158	0.836842	0.554455	0.245283	0.119497	0.63522	0.445545	0.666667	0	0.564103	594.833	0.0998693	0.826482	0.0664568	0.107061	0.900131	0.232673	0.0431769	0.0808889	1.00265	tag healthy nuclei < 50 %, tag tubulin effect > 50 %, tag membrane permeabilized > 50 %
A-77636	Multiplex	EUB0000359aCl	[H]Cl.NC[C@@H]1O[C@H](C23CC4CC(C3)CC(C2)C4)CC5=C1C=CC(O)=C5O	Chemogenomic candidate	10	24	HEK293T	1	-0.470018	258	0.135659	0.864341	0.369697	0.103139	0.156951	0.73991	0.630303	0.73913	0.782609	0.0434783	293.167	0.429543	0.395461	0.147538	0.457001	0.570457	0.312274	0.510446	0.0420248	1.14297	tag healthy nuclei < 50 %, tag tubulin effect > 50 %, tag mitochondrial mass > 50 %
A-77636	Multiplex	EUB0000359aCl	[H]Cl.NC[C@@H]1O[C@H](C23CC4CC(C3)CC(C2)C4)CC5=C1C=CC(O)=C5O	Chemogenomic candidate	1	12	HEK293T	1	0.799041	321	0.11215	0.88785	0.344828	0.491228	0.101754	0.407018	0.655172	0.557143	0.807143	0.0214286	274.667	0.427177	0.372026	0.131275	0.496699	0.572823	0.324854	0.687273	0.0469186	1.209	tag healthy nuclei < 50 %, tag tubulin effect > 50 %, tag mitochondrial mass > 50 %
A-77636	Multiplex	EUB0000359aCl	[H]Cl.NC[C@@H]1O[C@H](C23CC4CC(C3)CC(C2)C4)CC5=C1C=CC(O)=C5O	Chemogenomic candidate	10	12	HEK293T	1	-0.681942	245	0.163265	0.836735	0.608434	0.0829268	0.107317	0.809756	0.391566	0.588235	0.941176	0	274.667	0.427177	0.372026	0.131275	0.496699	0.572823	0.324854	0.687273	0.0469186	1.209	tag healthy nuclei < 50 %, tag tubulin effect > 50 %, tag mitochondrial mass > 50 %
A-77636	Multiplex	EUB0000359aCl	[H]Cl.NC[C@@H]1O[C@H](C23CC4CC(C3)CC(C2)C4)CC5=C1C=CC(O)=C5O	Chemogenomic candidate	10	48	U2OS	2	-0.565894	82	0.341463	0.658537	0.916667	0.277778	0.5	0.222222	0.0833333	0.666667	0.533333	0.8	153.583	0.433939	0.864953	0.0805245	0.0545227	0.566061	0.197701	0.115167	0.0429551	1.00576	tag healthy nuclei < 50 %, tag tubulin effect > 50 %, tag mitochondrial mass > 50 %, tag membrane permeabilized > 50 %
A-77636	Multiplex	EUB0000359aCl	[H]Cl.NC[C@@H]1O[C@H](C23CC4CC(C3)CC(C2)C4)CC5=C1C=CC(O)=C5O	Chemogenomic candidate	1	24	HEK293T	2	0.64101	310	0.0193548	0.980645	0.127907	0.674342	0.0427632	0.282895	0.872093	0.526829	0.2	0.117073	322.417	0.125402	0.652444	0.053119	0.294437	0.874598	0.274867	0.112063	0.0970907	1.01358	tag tubulin effect > 50 %
A-77636	Multiplex	EUB0000359aCl	[H]Cl.NC[C@@H]1O[C@H](C23CC4CC(C3)CC(C2)C4)CC5=C1C=CC(O)=C5O	Chemogenomic candidate	10	24	human fibroblast	1	1.12422	181	0.292818	0.707182	0.589744	0.523438	0.171875	0.304688	0.410256	0.507463	0.164179	0.0597015	106.75	0.494315	0.513538	0.210808	0.275654	0.505685	0.339408	0.0326339	0.298699	1.11839	tag tubulin effect > 50 %
A-77636	Multiplex	EUB0000359aCl	[H]Cl.NC[C@@H]1O[C@H](C23CC4CC(C3)CC(C2)C4)CC5=C1C=CC(O)=C5O	Chemogenomic candidate	1	48	HEK293T	2	0.621153	440	0.0181818	0.981818	0.08	0.831019	0.0532407	0.115741	0.92	0.420613	0.0306407	0.239554	594.833	0.0998693	0.826482	0.0664568	0.107061	0.900131	0.232673	0.0431769	0.0808889	1.00265
A-77636	Multiplex	EUB0000359aCl	[H]Cl.NC[C@@H]1O[C@H](C23CC4CC(C3)CC(C2)C4)CC5=C1C=CC(O)=C5O	Chemogenomic candidate	1	12	human fibroblast	1	1.15564	171	0.122807	0.877193	0.6	0.513333	0.286667	0.2	0.4	0.246753	0.012987	0.168831	107.083	0.631736	0.44459	0.220734	0.334676	0.368264	0.315502	0.0769574	0.274792	1.29875
A-77636	Multiplex	EUB0000359aCl	[H]Cl.NC[C@@H]1O[C@H](C23CC4CC(C3)CC(C2)C4)CC5=C1C=CC(O)=C5O	Chemogenomic candidate	1	48	human fibroblast	2	0.207332	114	0.105263	0.894737	1	0.77451	0.215686	0.00980392	0	0.21519	0	0.164557	108	0.498611	0.755765	0.214424	0.0298114	0.501389	0.304063	0.0278827	0.153127	1.11404
A-77636	Multiplex	EUB0000359aCl	[H]Cl.NC[C@@H]1O[C@H](C23CC4CC(C3)CC(C2)C4)CC5=C1C=CC(O)=C5O	Chemogenomic candidate	1	24	human fibroblast	1	1.83873	213	0.14554	0.85446	0.5	0.554945	0.324176	0.120879	0.5	0.267327	0	0.148515	106.75	0.494315	0.513538	0.210808	0.275654	0.505685	0.339408	0.0326339	0.298699	1.11839
A-77636	Multiplex	EUB0000359aCl	[H]Cl.NC[C@@H]1O[C@H](C23CC4CC(C3)CC(C2)C4)CC5=C1C=CC(O)=C5O	Chemogenomic candidate	1	48	human fibroblast	1	-0.84716	212	0.113208	0.886792	0.875	0.595745	0.361702	0.0425532	0.125	0.133929	0	0.107143	110.667	0.531499	0.514801	0.276708	0.208491	0.468501	0.298464	0.0241518	0.276892	5.201
A-77636	Multiplex	EUB0000359aCl	[H]Cl.NC[C@@H]1O[C@H](C23CC4CC(C3)CC(C2)C4)CC5=C1C=CC(O)=C5O	Chemogenomic candidate	1	0	U2OS	1	0	112	0.107143	0.892857	0.363636	0.77	0.12	0.11	0.636364	0.116883	0.207792	0.0649351	152.167	0.315784	0.706662	0.13121	0.162128	0.684216	0.118789	0.261243	0.0625529	0
A-77636	Multiplex	EUB0000359aCl	[H]Cl.NC[C@@H]1O[C@H](C23CC4CC(C3)CC(C2)C4)CC5=C1C=CC(O)=C5O	Chemogenomic candidate	1	48	HEK293T	1	3.66579	773	0.0633894	0.936611	0.142857	0.805249	0.117403	0.0773481	0.857143	0.176672	0.0548885	0.0617496	351.333	0.392717	0.429172	0.195155	0.375673	0.607283	0.266274	0.27356	0.0493784	0.987254
A-77636	Multiplex	EUB0000359aCl	[H]Cl.NC[C@@H]1O[C@H](C23CC4CC(C3)CC(C2)C4)CC5=C1C=CC(O)=C5O	Chemogenomic candidate	1	12	U2OS	1	0.459926	116	0.0775862	0.922414	0.6	0.803738	0.102804	0.0934579	0.4	0.0697674	0.116279	0.0581395	165.75	0.37331	0.780206	0.114105	0.10569	0.62669	0.0951184	0.0845665	0.073208	1.05123
A-77636	Multiplex	EUB0000359aCl	[H]Cl.NC[C@@H]1O[C@H](C23CC4CC(C3)CC(C2)C4)CC5=C1C=CC(O)=C5O	Chemogenomic candidate	1	24	U2OS	2	0.64742	114	0.0263158	0.973684	0.428571	0.855856	0.0810811	0.0630631	0.571429	0.126316	0.105263	0.0526316	102.167	0.521098	0.831195	0.0931875	0.0756178	0.478902	0.166245	0.0748286	0.0347485	1.01542
A-77636	Multiplex	EUB0000359aCl	[H]Cl.NC[C@@H]1O[C@H](C23CC4CC(C3)CC(C2)C4)CC5=C1C=CC(O)=C5O	Chemogenomic candidate	1	24	human fibroblast	2	0.64742	114	0.0263158	0.973684	0.428571	0.855856	0.0810811	0.0630631	0.571429	0.126316	0.105263	0.0526316	108.083	0.521098	0.831195	0.0931875	0.0756178	0.478902	0.166245	0.0748286	0.0347485	1.01542
A-77636	Multiplex	EUB0000359aCl	[H]Cl.NC[C@@H]1O[C@H](C23CC4CC(C3)CC(C2)C4)CC5=C1C=CC(O)=C5O	Chemogenomic candidate	10	0	U2OS	1	0	143	0.0769231	0.923077	0.333333	0.727273	0.113636	0.159091	0.666667	0.114583	0.291667	0.0520833	152.167	0.315784	0.706662	0.13121	0.162128	0.684216	0.118789	0.261243	0.0625529	0
A-77636	Multiplex	EUB0000359aCl	[H]Cl.NC[C@@H]1O[C@H](C23CC4CC(C3)CC(C2)C4)CC5=C1C=CC(O)=C5O	Chemogenomic candidate	1	0	human fibroblast	2	0	120	0.0583333	0.941667	0.727273	0.654867	0.247788	0.0973451	0.272727	0.162162	0.216216	0.0405405	101.167	0.681754	0.642258	0.240072	0.11767	0.318246	0.20189	0.247166	0.0567674	#DIV/0!
A-77636	Multiplex	EUB0000359aCl	[H]Cl.NC[C@@H]1O[C@H](C23CC4CC(C3)CC(C2)C4)CC5=C1C=CC(O)=C5O	Chemogenomic candidate	1	48	U2OS	2	0.32882	127	0.0393701	0.96063	0.571429	0.827869	0.114754	0.057377	0.428571	0.138614	0.217822	0.039604	153.583	0.433939	0.864953	0.0805245	0.0545227	0.566061	0.197701	0.115167	0.0429551	1.00576
A-77636	Multiplex	EUB0000359aCl	[H]Cl.NC[C@@H]1O[C@H](C23CC4CC(C3)CC(C2)C4)CC5=C1C=CC(O)=C5O	Chemogenomic candidate	10	0	human fibroblast	2	0	113	0.0530973	0.946903	0.666667	0.71028	0.205607	0.0841121	0.333333	0.223684	0.315789	0.0394737	101.167	0.681754	0.642258	0.240072	0.11767	0.318246	0.20189	0.247166	0.0567674	#DIV/0!
A-77636	Multiplex	EUB0000359aCl	[H]Cl.NC[C@@H]1O[C@H](C23CC4CC(C3)CC(C2)C4)CC5=C1C=CC(O)=C5O	Chemogenomic candidate	1	24	U2OS	1	0.544934	146	0.0753425	0.924658	0.461538	0.792593	0.111111	0.0962963	0.538462	0.0934579	0.0373832	0.0280374	212.417	0.319581	0.825187	0.0885786	0.0862345	0.680419	0.098522	0.0722682	0.0503222	0.99162
A-77636	Multiplex	EUB0000359aCl	[H]Cl.NC[C@@H]1O[C@H](C23CC4CC(C3)CC(C2)C4)CC5=C1C=CC(O)=C5O	Chemogenomic candidate	1	12	U2OS	2	1.3013	95	0.0315789	0.968421	0	0.913043	0.0652174	0.0217391	1	0.107143	0.0952381	0.0238095	78.3333	0.502249	0.830741	0.0963907	0.0728682	0.497751	0.154861	0.0827165	0.0293447	1.11609
A-77636	Multiplex	EUB0000359aCl	[H]Cl.NC[C@@H]1O[C@H](C23CC4CC(C3)CC(C2)C4)CC5=C1C=CC(O)=C5O	Chemogenomic candidate	1	12	human fibroblast	2	1.3013	95	0.0315789	0.968421	0	0.913043	0.0652174	0.0217391	1	0.107143	0.0952381	0.0238095	106.333	0.502249	0.830741	0.0963907	0.0728682	0.497751	0.154861	0.0827165	0.0293447	1.11609
A-77636	Multiplex	EUB0000359aCl	[H]Cl.NC[C@@H]1O[C@H](C23CC4CC(C3)CC(C2)C4)CC5=C1C=CC(O)=C5O	Chemogenomic candidate	10	0	U2OS	2	0	65	0.123077	0.876923	0.142857	0.77193	0.105263	0.122807	0.857143	0.0681818	0.113636	0.0227273	70.3333	0.262184	0.811025	0.0807672	0.108207	0.737816	0.0985605	0.153729	0.0272522	0
A-77636	Multiplex	EUB0000359aCl	[H]Cl.NC[C@@H]1O[C@H](C23CC4CC(C3)CC(C2)C4)CC5=C1C=CC(O)=C5O	Chemogenomic candidate	1	24	HEK293T	1	1.57531	389	0.133676	0.866324	0.341463	0.655786	0.10089	0.243323	0.658537	0.434389	0.466063	0.00904977	293.167	0.429543	0.395461	0.147538	0.457001	0.570457	0.312274	0.510446	0.0420248	1.14297
A-77636	Multiplex	EUB0000359aCl	[H]Cl.NC[C@@H]1O[C@H](C23CC4CC(C3)CC(C2)C4)CC5=C1C=CC(O)=C5O	Chemogenomic candidate	1	48	U2OS	1	0.372307	198	0.0656566	0.934343	0.333333	0.821622	0.0810811	0.0972973	0.666667	0.125	0.144737	0.00657895	330	0.352767	0.881662	0.0538695	0.0644681	0.647233	0.102719	0.0952982	0.0225671	1.00252
A-77636	Multiplex	EUB0000359aCl	[H]Cl.NC[C@@H]1O[C@H](C23CC4CC(C3)CC(C2)C4)CC5=C1C=CC(O)=C5O	Chemogenomic candidate	1	0	U2OS	2	0	98	0.0510204	0.94898	0.2	0.752688	0.0860215	0.16129	0.8	0.0857143	0.185714	0	70.3333	0.262184	0.811025	0.0807672	0.108207	0.737816	0.0985605	0.153729	0.0272522	0
Abemaciclib (methanesulfonate)	Multiplex	EUB0000692aMSA	CCN1CCN(CC1)CC2=CN=C(C=C2)NC3=NC=C(C(=N3)C4=CC5=C(C(=C4)F)N=C(N5C(C)C)C)F.CS(=O)(=O)O	Chemogenomic candidate	10	24	HEK293T	1	#NUM!	287	0.236934	0.763066	0.724551	0	0.237443	0.762557	0.275449	#DIV/0!	#DIV/0!	#DIV/0!	293.167	0.429543	0.395461	0.147538	0.457001	0.570457	0.312274	0.510446	0.0420248	1.14297	tag healthy nuclei < 50 %
Abemaciclib (methanesulfonate)	Multiplex	EUB0000692aMSA	CCN1CCN(CC1)CC2=CN=C(C=C2)NC3=NC=C(C(=N3)C4=CC5=C(C(=C4)F)N=C(N5C(C)C)C)F.CS(=O)(=O)O	Chemogenomic candidate	1	0	human fibroblast	1	0	120	0.0916667	0.908333	0.711111	0.293578	0.293578	0.412844	0.288889	0.28125	0.25	0.125	125.417	0.662404	0.310276	0.328567	0.361157	0.337596	0.203306	0.230525	0.0840641	#DIV/0!	tag healthy nuclei < 50 %
Abemaciclib (methanesulfonate)	Multiplex	EUB0000692aMSA	CCN1CCN(CC1)CC2=CN=C(C=C2)NC3=NC=C(C(=N3)C4=CC5=C(C(=C4)F)N=C(N5C(C)C)C)F.CS(=O)(=O)O	Chemogenomic candidate	10	0	human fibroblast	1	0	129	0.0852713	0.914729	0.806452	0.313559	0.423729	0.262712	0.193548	0.243243	0.27027	0.027027	125.417	0.662404	0.310276	0.328567	0.361157	0.337596	0.203306	0.230525	0.0840641	#DIV/0!	tag healthy nuclei < 50 %
Abemaciclib (methanesulfonate)	Multiplex	EUB0000692aMSA	CCN1CCN(CC1)CC2=CN=C(C=C2)NC3=NC=C(C(=N3)C4=CC5=C(C(=C4)F)N=C(N5C(C)C)C)F.CS(=O)(=O)O	Chemogenomic candidate	10	0	HEK293T	2	0	229	0.0524017	0.947598	0.142857	0.290323	0.0967742	0.612903	0.857143	0	0.174603	0.015873	233.167	0.0929753	0.24237	0.0798532	0.677777	0.907025	0.0412417	0.171457	0.0110984	#DIV/0!	tag healthy nuclei < 50 %
Abemaciclib (methanesulfonate)	Multiplex	EUB0000692aMSA	CCN1CCN(CC1)CC2=CN=C(C=C2)NC3=NC=C(C(=N3)C4=CC5=C(C(=C4)F)N=C(N5C(C)C)C)F.CS(=O)(=O)O	Chemogenomic candidate	1	0	HEK293T	2	0	190	0.0684211	0.931579	0.11194	0.175141	0.0677966	0.757062	0.88806	0	0.193548	0	233.167	0.0929753	0.24237	0.0798532	0.677777	0.907025	0.0412417	0.171457	0.0110984	#DIV/0!	tag healthy nuclei < 50 %
Abemaciclib (methanesulfonate)	Multiplex	EUB0000692aMSA	CCN1CCN(CC1)CC2=CN=C(C=C2)NC3=NC=C(C(=N3)C4=CC5=C(C(=C4)F)N=C(N5C(C)C)C)F.CS(=O)(=O)O	Chemogenomic candidate	10	12	human fibroblast	1	-0.908786	158	0.177215	0.822785	0.633333	0.130769	0.407692	0.461538	0.366667	0.470588	0.0588235	0.529412	107.083	0.631736	0.44459	0.220734	0.334676	0.368264	0.315502	0.0769574	0.274792	1.29875	tag healthy nuclei < 50 %, tag membrane permeabilized > 50 %
Abemaciclib (methanesulfonate)	Multiplex	EUB0000692aMSA	CCN1CCN(CC1)CC2=CN=C(C=C2)NC3=NC=C(C(=N3)C4=CC5=C(C(=C4)F)N=C(N5C(C)C)C)F.CS(=O)(=O)O	Chemogenomic candidate	1	0	HEK293T	1	0	249	0.100402	0.899598	0.369697	0.183036	0.0803571	0.736607	0.630303	0	0.878049	0	256.5	0.333294	0.212413	0.0958204	0.691766	0.666706	0.0141172	0.774309	0.00115741	#DIV/0!	tag healthy nuclei < 50 %, tag mitochondrial mass > 50 %
Abemaciclib (methanesulfonate)	Multiplex	EUB0000692aMSA	CCN1CCN(CC1)CC2=CN=C(C=C2)NC3=NC=C(C(=N3)C4=CC5=C(C(=C4)F)N=C(N5C(C)C)C)F.CS(=O)(=O)O	Chemogenomic candidate	10	0	HEK293T	1	0	307	0.0977199	0.90228	0.363636	0.198556	0.126354	0.67509	0.636364	0	0.8	0	256.5	0.333294	0.212413	0.0958204	0.691766	0.666706	0.0141172	0.774309	0.00115741	#DIV/0!	tag healthy nuclei < 50 %, tag mitochondrial mass > 50 %
Abemaciclib (methanesulfonate)	Multiplex	EUB0000692aMSA	CCN1CCN(CC1)CC2=CN=C(C=C2)NC3=NC=C(C(=N3)C4=CC5=C(C(=C4)F)N=C(N5C(C)C)C)F.CS(=O)(=O)O	Chemogenomic candidate	10	48	HEK293T	1	-0.958103	291	0.278351	0.721649	0.802632	0.0047619	0.271429	0.72381	0.197368	0	1	1	351.333	0.392717	0.429172	0.195155	0.375673	0.607283	0.266274	0.27356	0.0493784	0.987254	tag healthy nuclei < 50 %, tag mitochondrial mass > 50 %, tag membrane permeabilized > 50 %
Abemaciclib (methanesulfonate)	Multiplex	EUB0000692aMSA	CCN1CCN(CC1)CC2=CN=C(C=C2)NC3=NC=C(C(=N3)C4=CC5=C(C(=C4)F)N=C(N5C(C)C)C)F.CS(=O)(=O)O	Chemogenomic candidate	10	24	human fibroblast	1	-0.83616	122	0.254098	0.745902	0.8	0.164835	0.450549	0.384615	0.2	0.533333	0	0.466667	106.75	0.494315	0.513538	0.210808	0.275654	0.505685	0.339408	0.0326339	0.298699	1.11839	tag healthy nuclei < 50 %, tag tubulin effect > 50 %
Abemaciclib (methanesulfonate)	Multiplex	EUB0000692aMSA	CCN1CCN(CC1)CC2=CN=C(C=C2)NC3=NC=C(C(=N3)C4=CC5=C(C(=C4)F)N=C(N5C(C)C)C)F.CS(=O)(=O)O	Chemogenomic candidate	10	48	human fibroblast	1	351.31	123	0.333333	0.666667	1	0.207317	0.695122	0.097561	0	0.764706	0.0588235	0.411765	110.667	0.531499	0.514801	0.276708	0.208491	0.468501	0.298464	0.0241518	0.276892	5.201	tag healthy nuclei < 50 %, tag tubulin effect > 50 %
Abemaciclib (methanesulfonate)	Multiplex	EUB0000692aMSA	CCN1CCN(CC1)CC2=CN=C(C=C2)NC3=NC=C(C(=N3)C4=CC5=C(C(=C4)F)N=C(N5C(C)C)C)F.CS(=O)(=O)O	Chemogenomic candidate	1	12	human fibroblast	1	7.45021	187	0.15508	0.84492	0.75	0.405063	0.392405	0.202532	0.25	0.578125	0.21875	0.171875	107.083	0.631736	0.44459	0.220734	0.334676	0.368264	0.315502	0.0769574	0.274792	1.29875	tag healthy nuclei < 50 %, tag tubulin effect > 50 %
Abemaciclib (methanesulfonate)	Multiplex	EUB0000692aMSA	CCN1CCN(CC1)CC2=CN=C(C=C2)NC3=NC=C(C(=N3)C4=CC5=C(C(=C4)F)N=C(N5C(C)C)C)F.CS(=O)(=O)O	Chemogenomic candidate	1	24	human fibroblast	1	6.07958	240	0.216667	0.783333	0.448276	0.452128	0.393617	0.154255	0.551724	0.694118	0.0823529	0.152941	106.75	0.494315	0.513538	0.210808	0.275654	0.505685	0.339408	0.0326339	0.298699	1.11839	tag healthy nuclei < 50 %, tag tubulin effect > 50 %
Abemaciclib (methanesulfonate)	Multiplex	EUB0000692aMSA	CCN1CCN(CC1)CC2=CN=C(C=C2)NC3=NC=C(C(=N3)C4=CC5=C(C(=C4)F)N=C(N5C(C)C)C)F.CS(=O)(=O)O	Chemogenomic candidate	1	48	human fibroblast	2	0.847021	199	0.165829	0.834171	0.75	0.439759	0.536145	0.0240964	0.25	0.616438	0.0547945	0.109589	108	0.498611	0.755765	0.214424	0.0298114	0.501389	0.304063	0.0278827	0.153127	1.11404	tag healthy nuclei < 50 %, tag tubulin effect > 50 %
Abemaciclib (methanesulfonate)	Multiplex	EUB0000692aMSA	CCN1CCN(CC1)CC2=CN=C(C=C2)NC3=NC=C(C(=N3)C4=CC5=C(C(=C4)F)N=C(N5C(C)C)C)F.CS(=O)(=O)O	Chemogenomic candidate	1	48	human fibroblast	1	-0.257186	246	0.378049	0.621951	0.565217	0.411765	0.437908	0.150327	0.434783	0.698413	0.126984	0.0634921	110.667	0.531499	0.514801	0.276708	0.208491	0.468501	0.298464	0.0241518	0.276892	5.201	tag healthy nuclei < 50 %, tag tubulin effect > 50 %
Abemaciclib (methanesulfonate)	Multiplex	EUB0000692aMSA	CCN1CCN(CC1)CC2=CN=C(C=C2)NC3=NC=C(C(=N3)C4=CC5=C(C(=C4)F)N=C(N5C(C)C)C)F.CS(=O)(=O)O	Chemogenomic candidate	10	12	HEK293T	1	-0.972417	289	0.256055	0.743945	0.740331	0.0139535	0.144186	0.84186	0.259669	0.666667	0.333333	0	274.667	0.427177	0.372026	0.131275	0.496699	0.572823	0.324854	0.687273	0.0469186	1.209	tag healthy nuclei < 50 %, tag tubulin effect > 50 %
Abemaciclib (methanesulfonate)	Multiplex	EUB0000692aMSA	CCN1CCN(CC1)CC2=CN=C(C=C2)NC3=NC=C(C(=N3)C4=CC5=C(C(=C4)F)N=C(N5C(C)C)C)F.CS(=O)(=O)O	Chemogenomic candidate	1	12	HEK293T	2	0.496294	181	0.0497238	0.950276	0.405405	0.27907	0.0755814	0.645349	0.594595	0.8125	0.833333	0.145833	256.75	0.112092	0.454373	0.0637918	0.481836	0.887908	0.182057	0.132768	0.0724535	1.03765	tag healthy nuclei < 50 %, tag tubulin effect > 50 %, tag mitochondrial mass > 50 %
Abemaciclib (methanesulfonate)	Multiplex	EUB0000692aMSA	CCN1CCN(CC1)CC2=CN=C(C=C2)NC3=NC=C(C(=N3)C4=CC5=C(C(=C4)F)N=C(N5C(C)C)C)F.CS(=O)(=O)O	Chemogenomic candidate	10	48	HEK293T	2	-0.339369	202	0.287129	0.712871	0.839286	0.118056	0.104167	0.777778	0.160714	0.882353	0.941176	0.117647	594.833	0.0998693	0.826482	0.0664568	0.107061	0.900131	0.232673	0.0431769	0.0808889	1.00265	tag healthy nuclei < 50 %, tag tubulin effect > 50 %, tag mitochondrial mass > 50 %
Abemaciclib (methanesulfonate)	Multiplex	EUB0000692aMSA	CCN1CCN(CC1)CC2=CN=C(C=C2)NC3=NC=C(C(=N3)C4=CC5=C(C(=C4)F)N=C(N5C(C)C)C)F.CS(=O)(=O)O	Chemogenomic candidate	10	24	HEK293T	2	-0.30476	213	0.215962	0.784038	0.796875	0.185629	0.0479042	0.766467	0.203125	0.935484	0.935484	0.0322581	322.417	0.125402	0.652444	0.053119	0.294437	0.874598	0.274867	0.112063	0.0970907	1.01358	tag healthy nuclei < 50 %, tag tubulin effect > 50 %, tag mitochondrial mass > 50 %
Abemaciclib (methanesulfonate)	Multiplex	EUB0000692aMSA	CCN1CCN(CC1)CC2=CN=C(C=C2)NC3=NC=C(C(=N3)C4=CC5=C(C(=C4)F)N=C(N5C(C)C)C)F.CS(=O)(=O)O	Chemogenomic candidate	1	24	HEK293T	2	0.687118	201	0.0547264	0.945274	0.516129	0.452632	0.0578947	0.489474	0.483871	0.94186	0.883721	0.0232558	322.417	0.125402	0.652444	0.053119	0.294437	0.874598	0.274867	0.112063	0.0970907	1.01358	tag healthy nuclei < 50 %, tag tubulin effect > 50 %, tag mitochondrial mass > 50 %
Abemaciclib (methanesulfonate)	Multiplex	EUB0000692aMSA	CCN1CCN(CC1)CC2=CN=C(C=C2)NC3=NC=C(C(=N3)C4=CC5=C(C(=C4)F)N=C(N5C(C)C)C)F.CS(=O)(=O)O	Chemogenomic candidate	10	12	HEK293T	2	-0.281686	219	0.210046	0.789954	0.62037	0.254335	0.121387	0.624277	0.37963	0.977273	0.795455	0.0227273	256.75	0.112092	0.454373	0.0637918	0.481836	0.887908	0.182057	0.132768	0.0724535	1.03765	tag healthy nuclei < 50 %, tag tubulin effect > 50 %, tag mitochondrial mass > 50 %
Abemaciclib (methanesulfonate)	Multiplex	EUB0000692aMSA	CCN1CCN(CC1)CC2=CN=C(C=C2)NC3=NC=C(C(=N3)C4=CC5=C(C(=C4)F)N=C(N5C(C)C)C)F.CS(=O)(=O)O	Chemogenomic candidate	1	24	HEK293T	1	0.670928	253	0.181818	0.818182	0.632653	0.328502	0.198068	0.47343	0.367347	0.955882	1	0	293.167	0.429543	0.395461	0.147538	0.457001	0.570457	0.312274	0.510446	0.0420248	1.14297	tag healthy nuclei < 50 %, tag tubulin effect > 50 %, tag mitochondrial mass > 50 %
Abemaciclib (methanesulfonate)	Multiplex	EUB0000692aMSA	CCN1CCN(CC1)CC2=CN=C(C=C2)NC3=NC=C(C(=N3)C4=CC5=C(C(=C4)F)N=C(N5C(C)C)C)F.CS(=O)(=O)O	Chemogenomic candidate	1	12	HEK293T	1	-0.0598667	249	0.176707	0.823293	0.6	0.190244	0.17561	0.634146	0.4	0.923077	0.948718	0	274.667	0.427177	0.372026	0.131275	0.496699	0.572823	0.324854	0.687273	0.0469186	1.209	tag healthy nuclei < 50 %, tag tubulin effect > 50 %, tag mitochondrial mass > 50 %
Abemaciclib (methanesulfonate)	Multiplex	EUB0000692aMSA	CCN1CCN(CC1)CC2=CN=C(C=C2)NC3=NC=C(C(=N3)C4=CC5=C(C(=C4)F)N=C(N5C(C)C)C)F.CS(=O)(=O)O	Chemogenomic candidate	1	48	HEK293T	1	0.636874	254	0.177165	0.822835	0.58427	0.282297	0.291866	0.425837	0.41573	0.898305	0.813559	0	351.333	0.392717	0.429172	0.195155	0.375673	0.607283	0.266274	0.27356	0.0493784	0.987254	tag healthy nuclei < 50 %, tag tubulin effect > 50 %, tag mitochondrial mass > 50 %
Abemaciclib (methanesulfonate)	Multiplex	EUB0000692aMSA	CCN1CCN(CC1)CC2=CN=C(C=C2)NC3=NC=C(C(=N3)C4=CC5=C(C(=C4)F)N=C(N5C(C)C)C)F.CS(=O)(=O)O	Chemogenomic candidate	10	48	U2OS	1	-0.674733	137	0.153285	0.846715	0.983871	0.0258621	0.439655	0.534483	0.016129	1	1	1	330	0.352767	0.881662	0.0538695	0.0644681	0.647233	0.102719	0.0952982	0.0225671	1.00252	tag healthy nuclei < 50 %, tag tubulin effect > 50 %, tag mitochondrial mass > 50 %, tag membrane permeabilized > 50 %
Abemaciclib (methanesulfonate)	Multiplex	EUB0000692aMSA	CCN1CCN(CC1)CC2=CN=C(C=C2)NC3=NC=C(C(=N3)C4=CC5=C(C(=C4)F)N=C(N5C(C)C)C)F.CS(=O)(=O)O	Chemogenomic candidate	10	48	U2OS	2	-0.46458	70	0.342857	0.657143	1	0.456522	0.173913	0.369565	0	0.952381	0.952381	1	153.583	0.433939	0.864953	0.0805245	0.0545227	0.566061	0.197701	0.115167	0.0429551	1.00576	tag healthy nuclei < 50 %, tag tubulin effect > 50 %, tag mitochondrial mass > 50 %, tag membrane permeabilized > 50 %
Abemaciclib (methanesulfonate)	Multiplex	EUB0000692aMSA	CCN1CCN(CC1)CC2=CN=C(C=C2)NC3=NC=C(C(=N3)C4=CC5=C(C(=C4)F)N=C(N5C(C)C)C)F.CS(=O)(=O)O	Chemogenomic candidate	10	24	U2OS	2	-0.944678	74	0.202703	0.797297	0.971429	0.135593	0.271186	0.59322	0.0285714	1	0.875	1	102.167	0.521098	0.831195	0.0931875	0.0756178	0.478902	0.166245	0.0748286	0.0347485	1.01542	tag healthy nuclei < 50 %, tag tubulin effect > 50 %, tag mitochondrial mass > 50 %, tag membrane permeabilized > 50 %
Abemaciclib (methanesulfonate)	Multiplex	EUB0000692aMSA	CCN1CCN(CC1)CC2=CN=C(C=C2)NC3=NC=C(C(=N3)C4=CC5=C(C(=C4)F)N=C(N5C(C)C)C)F.CS(=O)(=O)O	Chemogenomic candidate	10	24	human fibroblast	2	-0.944678	74	0.202703	0.797297	0.971429	0.135593	0.271186	0.59322	0.0285714	1	0.875	1	108.083	0.521098	0.831195	0.0931875	0.0756178	0.478902	0.166245	0.0748286	0.0347485	1.01542	tag healthy nuclei < 50 %, tag tubulin effect > 50 %, tag mitochondrial mass > 50 %, tag membrane permeabilized > 50 %
Abemaciclib (methanesulfonate)	Multiplex	EUB0000692aMSA	CCN1CCN(CC1)CC2=CN=C(C=C2)NC3=NC=C(C(=N3)C4=CC5=C(C(=C4)F)N=C(N5C(C)C)C)F.CS(=O)(=O)O	Chemogenomic candidate	10	12	U2OS	2	-0.987569	88	0.0909091	0.909091	0.833333	0.225	0.325	0.45	0.166667	1	0.944444	0.888889	78.3333	0.502249	0.830741	0.0963907	0.0728682	0.497751	0.154861	0.0827165	0.0293447	1.11609	tag healthy nuclei < 50 %, tag tubulin effect > 50 %, tag mitochondrial mass > 50 %, tag membrane permeabilized > 50 %
Abemaciclib (methanesulfonate)	Multiplex	EUB0000692aMSA	CCN1CCN(CC1)CC2=CN=C(C=C2)NC3=NC=C(C(=N3)C4=CC5=C(C(=C4)F)N=C(N5C(C)C)C)F.CS(=O)(=O)O	Chemogenomic candidate	10	12	human fibroblast	2	-0.987569	88	0.0909091	0.909091	0.833333	0.225	0.325	0.45	0.166667	1	0.944444	0.888889	106.333	0.502249	0.830741	0.0963907	0.0728682	0.497751	0.154861	0.0827165	0.0293447	1.11609	tag healthy nuclei < 50 %, tag tubulin effect > 50 %, tag mitochondrial mass > 50 %, tag membrane permeabilized > 50 %
Abemaciclib (methanesulfonate)	Multiplex	EUB0000692aMSA	CCN1CCN(CC1)CC2=CN=C(C=C2)NC3=NC=C(C(=N3)C4=CC5=C(C(=C4)F)N=C(N5C(C)C)C)F.CS(=O)(=O)O	Chemogenomic candidate	10	24	U2OS	1	-0.945241	135	0.0814815	0.918519	0.967213	0.0887097	0.419355	0.491935	0.0327869	0.909091	0.909091	0.727273	212.417	0.319581	0.825187	0.0885786	0.0862345	0.680419	0.098522	0.0722682	0.0503222	0.99162	tag healthy nuclei < 50 %, tag tubulin effect > 50 %, tag mitochondrial mass > 50 %, tag membrane permeabilized > 50 %
Abemaciclib (methanesulfonate)	Multiplex	EUB0000692aMSA	CCN1CCN(CC1)CC2=CN=C(C=C2)NC3=NC=C(C(=N3)C4=CC5=C(C(=C4)F)N=C(N5C(C)C)C)F.CS(=O)(=O)O	Chemogenomic candidate	10	12	U2OS	1	-0.946873	151	0.0596026	0.940397	0.82	0.295775	0.352113	0.352113	0.18	1	1	0.666667	165.75	0.37331	0.780206	0.114105	0.10569	0.62669	0.0951184	0.0845665	0.073208	1.05123	tag healthy nuclei < 50 %, tag tubulin effect > 50 %, tag mitochondrial mass > 50 %, tag membrane permeabilized > 50 %
Abemaciclib (methanesulfonate)	Multiplex	EUB0000692aMSA	CCN1CCN(CC1)CC2=CN=C(C=C2)NC3=NC=C(C(=N3)C4=CC5=C(C(=C4)F)N=C(N5C(C)C)C)F.CS(=O)(=O)O	Chemogenomic candidate	10	48	human fibroblast	2	-0.822936	145	0.537931	0.462069	0.777778	0.507463	0.358209	0.134328	0.222222	0.529412	0.382353	0.235294	108	0.498611	0.755765	0.214424	0.0298114	0.501389	0.304063	0.0278827	0.153127	1.11404	tag Hoechst High Intensity, tag tubulin effect > 50 %
Abemaciclib (methanesulfonate)	Multiplex	EUB0000692aMSA	CCN1CCN(CC1)CC2=CN=C(C=C2)NC3=NC=C(C(=N3)C4=CC5=C(C(=C4)F)N=C(N5C(C)C)C)F.CS(=O)(=O)O	Chemogenomic candidate	1	48	U2OS	2	-0.165691	81	0.0864198	0.91358	0.647059	0.513514	0.256757	0.22973	0.352941	0.842105	0.710526	0.315789	153.583	0.433939	0.864953	0.0805245	0.0545227	0.566061	0.197701	0.115167	0.0429551	1.00576	tag tubulin effect > 50 %, tag mitochondrial mass > 50 %
Abemaciclib (methanesulfonate)	Multiplex	EUB0000692aMSA	CCN1CCN(CC1)CC2=CN=C(C=C2)NC3=NC=C(C(=N3)C4=CC5=C(C(=C4)F)N=C(N5C(C)C)C)F.CS(=O)(=O)O	Chemogenomic candidate	1	24	U2OS	2	-0.227156	75	0.106667	0.893333	0.583333	0.61194	0.208955	0.179104	0.416667	0.878049	0.853659	0.219512	102.167	0.521098	0.831195	0.0931875	0.0756178	0.478902	0.166245	0.0748286	0.0347485	1.01542	tag tubulin effect > 50 %, tag mitochondrial mass > 50 %
Abemaciclib (methanesulfonate)	Multiplex	EUB0000692aMSA	CCN1CCN(CC1)CC2=CN=C(C=C2)NC3=NC=C(C(=N3)C4=CC5=C(C(=C4)F)N=C(N5C(C)C)C)F.CS(=O)(=O)O	Chemogenomic candidate	1	24	human fibroblast	2	-0.227156	75	0.106667	0.893333	0.583333	0.61194	0.208955	0.179104	0.416667	0.878049	0.853659	0.219512	108.083	0.521098	0.831195	0.0931875	0.0756178	0.478902	0.166245	0.0748286	0.0347485	1.01542	tag tubulin effect > 50 %, tag mitochondrial mass > 50 %
Abemaciclib (methanesulfonate)	Multiplex	EUB0000692aMSA	CCN1CCN(CC1)CC2=CN=C(C=C2)NC3=NC=C(C(=N3)C4=CC5=C(C(=C4)F)N=C(N5C(C)C)C)F.CS(=O)(=O)O	Chemogenomic candidate	1	48	U2OS	1	0.360254	215	0.0837209	0.916279	0.55814	0.517766	0.263959	0.218274	0.44186	0.794118	0.823529	0.186275	330	0.352767	0.881662	0.0538695	0.0644681	0.647233	0.102719	0.0952982	0.0225671	1.00252	tag tubulin effect > 50 %, tag mitochondrial mass > 50 %
Abemaciclib (methanesulfonate)	Multiplex	EUB0000692aMSA	CCN1CCN(CC1)CC2=CN=C(C=C2)NC3=NC=C(C(=N3)C4=CC5=C(C(=C4)F)N=C(N5C(C)C)C)F.CS(=O)(=O)O	Chemogenomic candidate	1	24	U2OS	1	-0.244754	171	0.0877193	0.912281	0.53125	0.596154	0.198718	0.205128	0.46875	0.892473	0.913978	0.107527	212.417	0.319581	0.825187	0.0885786	0.0862345	0.680419	0.098522	0.0722682	0.0503222	0.99162	tag tubulin effect > 50 %, tag mitochondrial mass > 50 %
Abemaciclib (methanesulfonate)	Multiplex	EUB0000692aMSA	CCN1CCN(CC1)CC2=CN=C(C=C2)NC3=NC=C(C(=N3)C4=CC5=C(C(=C4)F)N=C(N5C(C)C)C)F.CS(=O)(=O)O	Chemogenomic candidate	1	12	U2OS	2	-0.176803	73	0.0684932	0.931507	0.4	0.676471	0.176471	0.147059	0.6	0.978261	0.913043	0.0869565	78.3333	0.502249	0.830741	0.0963907	0.0728682	0.497751	0.154861	0.0827165	0.0293447	1.11609	tag tubulin effect > 50 %, tag mitochondrial mass > 50 %
Abemaciclib (methanesulfonate)	Multiplex	EUB0000692aMSA	CCN1CCN(CC1)CC2=CN=C(C=C2)NC3=NC=C(C(=N3)C4=CC5=C(C(=C4)F)N=C(N5C(C)C)C)F.CS(=O)(=O)O	Chemogenomic candidate	1	12	human fibroblast	2	-0.176803	73	0.0684932	0.931507	0.4	0.676471	0.176471	0.147059	0.6	0.978261	0.913043	0.0869565	106.333	0.502249	0.830741	0.0963907	0.0728682	0.497751	0.154861	0.0827165	0.0293447	1.11609	tag tubulin effect > 50 %, tag mitochondrial mass > 50 %
Abemaciclib (methanesulfonate)	Multiplex	EUB0000692aMSA	CCN1CCN(CC1)CC2=CN=C(C=C2)NC3=NC=C(C(=N3)C4=CC5=C(C(=C4)F)N=C(N5C(C)C)C)F.CS(=O)(=O)O	Chemogenomic candidate	1	12	U2OS	1	-0.498528	160	0.08125	0.91875	0.461538	0.639456	0.183673	0.176871	0.538462	0.914894	0.925532	0.0425532	165.75	0.37331	0.780206	0.114105	0.10569	0.62669	0.0951184	0.0845665	0.073208	1.05123	tag tubulin effect > 50 %, tag mitochondrial mass > 50 %
Abemaciclib (methanesulfonate)	Multiplex	EUB0000692aMSA	CCN1CCN(CC1)CC2=CN=C(C=C2)NC3=NC=C(C(=N3)C4=CC5=C(C(=C4)F)N=C(N5C(C)C)C)F.CS(=O)(=O)O	Chemogenomic candidate	1	48	HEK293T	2	0.643545	243	0.0658436	0.934156	0.625	0.656388	0.0969163	0.246696	0.375	0.932886	0.711409	0.0134228	594.833	0.0998693	0.826482	0.0664568	0.107061	0.900131	0.232673	0.0431769	0.0808889	1.00265	tag tubulin effect > 50 %, tag mitochondrial mass > 50 %
Abemaciclib (methanesulfonate)	Multiplex	EUB0000692aMSA	CCN1CCN(CC1)CC2=CN=C(C=C2)NC3=NC=C(C(=N3)C4=CC5=C(C(=C4)F)N=C(N5C(C)C)C)F.CS(=O)(=O)O	Chemogenomic candidate	1	0	human fibroblast	2	0	104	0.163462	0.836538	0.4	0.678161	0.206897	0.114943	0.6	0.118644	0.135593	0.118644	101.167	0.681754	0.642258	0.240072	0.11767	0.318246	0.20189	0.247166	0.0567674	#DIV/0!
Abemaciclib (methanesulfonate)	Multiplex	EUB0000692aMSA	CCN1CCN(CC1)CC2=CN=C(C=C2)NC3=NC=C(C(=N3)C4=CC5=C(C(=C4)F)N=C(N5C(C)C)C)F.CS(=O)(=O)O	Chemogenomic candidate	10	0	U2OS	2	0	63	0.0634921	0.936508	0.272727	0.79661	0.0169492	0.186441	0.727273	0.0851064	0.106383	0.106383	70.3333	0.262184	0.811025	0.0807672	0.108207	0.737816	0.0985605	0.153729	0.0272522	0
Abemaciclib (methanesulfonate)	Multiplex	EUB0000692aMSA	CCN1CCN(CC1)CC2=CN=C(C=C2)NC3=NC=C(C(=N3)C4=CC5=C(C(=C4)F)N=C(N5C(C)C)C)F.CS(=O)(=O)O	Chemogenomic candidate	1	0	U2OS	1	0	163	0.0858896	0.91411	0.375	0.771812	0.120805	0.107383	0.625	0.165217	0.226087	0.0608696	152.167	0.315784	0.706662	0.13121	0.162128	0.684216	0.118789	0.261243	0.0625529	0
Abemaciclib (methanesulfonate)	Multiplex	EUB0000692aMSA	CCN1CCN(CC1)CC2=CN=C(C=C2)NC3=NC=C(C(=N3)C4=CC5=C(C(=C4)F)N=C(N5C(C)C)C)F.CS(=O)(=O)O	Chemogenomic candidate	10	0	U2OS	1	0	140	0.0714286	0.928571	0.117647	0.761538	0.107692	0.130769	0.882353	0.161616	0.292929	0.0505051	152.167	0.315784	0.706662	0.13121	0.162128	0.684216	0.118789	0.261243	0.0625529	0
Abemaciclib (methanesulfonate)	Multiplex	EUB0000692aMSA	CCN1CCN(CC1)CC2=CN=C(C=C2)NC3=NC=C(C(=N3)C4=CC5=C(C(=C4)F)N=C(N5C(C)C)C)F.CS(=O)(=O)O	Chemogenomic candidate	10	0	human fibroblast	2	0	97	0.123711	0.876289	0.428571	0.729412	0.188235	0.0823529	0.571429	0.241935	0.290323	0.0483871	101.167	0.681754	0.642258	0.240072	0.11767	0.318246	0.20189	0.247166	0.0567674	#DIV/0!
Abemaciclib (methanesulfonate)	Multiplex	EUB0000692aMSA	CCN1CCN(CC1)CC2=CN=C(C=C2)NC3=NC=C(C(=N3)C4=CC5=C(C(=C4)F)N=C(N5C(C)C)C)F.CS(=O)(=O)O	Chemogenomic candidate	1	0	U2OS	2	0	62	0.0483871	0.951613	0.4	0.813559	0.101695	0.0847458	0.6	0.125	0.0833333	0.0208333	70.3333	0.262184	0.811025	0.0807672	0.108207	0.737816	0.0985605	0.153729	0.0272522	0
Adavosertib	Multiplex	EUB0000605a	CC(C)(C1=NC(=CC=C1)N2C3=NC(=NC=C3C(=O)N2CC=C)NC4=CC=C(C=C4)N5CCN(CC5)C)O	Chemogenomic candidate	1	24	U2OS	1	-0.49182	155	0.083871	0.916129	0.62963	0.415493	0.204225	0.380282	0.37037	0.389831	0.254237	0.305085	276.667	0.370298	0.917275	0.0423433	0.0403816	0.629702	0.31212	0.21103	0.0682442	1.0014	tag healthy nuclei < 50 %
Adavosertib	Multiplex	EUB0000605a	CC(C)(C1=NC(=CC=C1)N2C3=NC(=NC=C3C(=O)N2CC=C)NC4=CC=C(C=C4)N5CCN(CC5)C)O	Chemogenomic candidate	10	12	human fibroblast	2	1.71036e+06	81	0.419753	0.580247	0.75	0.361702	0.553191	0.0851064	0.25	0.352941	0.235294	0.176471	84.3333	0.520833	0.311795	0.58592	0.102285	0.479167	0.125354	0.149616	0.0949875	7.64557e+11	tag healthy nuclei < 50 %
Adavosertib	Multiplex	EUB0000605a	CC(C)(C1=NC(=CC=C1)N2C3=NC(=NC=C3C(=O)N2CC=C)NC4=CC=C(C=C4)N5CCN(CC5)C)O	Chemogenomic candidate	10	12	HEK293T	1	-0.94534	637	0.175824	0.824176	0.124161	0.226667	0.205714	0.567619	0.875839	0.478992	0.168067	0.168067	691.5	0.185934	0.698273	0.149796	0.151931	0.814066	0.0267306	0.0412745	0.044192	1.10218	tag healthy nuclei < 50 %
Adavosertib	Multiplex	EUB0000605a	CC(C)(C1=NC(=CC=C1)N2C3=NC(=NC=C3C(=O)N2CC=C)NC4=CC=C(C=C4)N5CCN(CC5)C)O	Chemogenomic candidate	1	12	human fibroblast	2	25346.7	87	0.356322	0.643678	0.5	0.375	0.482143	0.142857	0.5	0.190476	0.190476	0.0952381	84.3333	0.520833	0.311795	0.58592	0.102285	0.479167	0.125354	0.149616	0.0949875	7.64557e+11	tag healthy nuclei < 50 %
Adavosertib	Multiplex	EUB0000605a	CC(C)(C1=NC(=CC=C1)N2C3=NC(=NC=C3C(=O)N2CC=C)NC4=CC=C(C=C4)N5CCN(CC5)C)O	Chemogenomic candidate	10	24	human fibroblast	2	-0.928778	84	0.297619	0.702381	1	0.355932	0.610169	0.0338983	0	0.285714	0.0952381	0.0952381	80.0833	0.552381	0.346171	0.555718	0.0981105	0.447619	0.11087	0.120814	0.103	231110	tag healthy nuclei < 50 %
Adavosertib	Multiplex	EUB0000605a	CC(C)(C1=NC(=CC=C1)N2C3=NC(=NC=C3C(=O)N2CC=C)NC4=CC=C(C=C4)N5CCN(CC5)C)O	Chemogenomic candidate	10	12	human fibroblast	1	-0.547379	218	0.146789	0.853211	0.444444	0.462366	0.295699	0.241935	0.555556	0.232558	0.0581395	0.0813953	230.667	0.695283	0.596796	0.258529	0.144676	0.304717	0.0342007	0.0357415	0.0583164	1.23771	tag healthy nuclei < 50 %
Adavosertib	Multiplex	EUB0000605a	CC(C)(C1=NC(=CC=C1)N2C3=NC(=NC=C3C(=O)N2CC=C)NC4=CC=C(C=C4)N5CCN(CC5)C)O	Chemogenomic candidate	1	24	HEK293T	1	-0.0599009	590	0.0932203	0.90678	0.175758	0.469159	0.22243	0.308411	0.824242	0.0677291	0.0517928	0.0677291	838.25	0.154355	0.792279	0.137252	0.0704688	0.845645	0.0333863	0.0308318	0.0797788	1.0151	tag healthy nuclei < 50 %
Adavosertib	Multiplex	EUB0000605a	CC(C)(C1=NC(=CC=C1)N2C3=NC(=NC=C3C(=O)N2CC=C)NC4=CC=C(C=C4)N5CCN(CC5)C)O	Chemogenomic candidate	10	0	HEK293T	1	0	940	0.172727	0.827273	0.0983607	0.496075	0.216641	0.287284	0.901639	0.0126582	0.148734	0.056962	865.667	0.13691	0.491163	0.230041	0.278796	0.86309	0.0185405	0.129798	0.0320833	#DIV/0!	tag healthy nuclei < 50 %
Adavosertib	Multiplex	EUB0000605a	CC(C)(C1=NC(=CC=C1)N2C3=NC(=NC=C3C(=O)N2CC=C)NC4=CC=C(C=C4)N5CCN(CC5)C)O	Chemogenomic candidate	10	24	human fibroblast	1	-0.345223	241	0.207469	0.792531	0.560976	0.47644	0.308901	0.21466	0.439024	0.21978	0.10989	0.043956	242.833	0.651394	0.612787	0.255064	0.132149	0.348606	0.025027	0.0173706	0.0467803	1.19614	tag healthy nuclei < 50 %
Adavosertib	Multiplex	EUB0000605a	CC(C)(C1=NC(=CC=C1)N2C3=NC(=NC=C3C(=O)N2CC=C)NC4=CC=C(C=C4)N5CCN(CC5)C)O	Chemogenomic candidate	10	0	human fibroblast	2	0	82	0.378049	0.621951	0.333333	0.45098	0.490196	0.0588235	0.666667	0.26087	0.434783	0.0434783	99.3333	0.557903	0.293865	0.595118	0.111016	0.442097	0.112114	0.290215	0.0427216	#DIV/0!	tag healthy nuclei < 50 %
Adavosertib	Multiplex	EUB0000605a	CC(C)(C1=NC(=CC=C1)N2C3=NC(=NC=C3C(=O)N2CC=C)NC4=CC=C(C=C4)N5CCN(CC5)C)O	Chemogenomic candidate	1	12	HEK293T	1	-0.622648	606	0.145215	0.854785	0.169903	0.368726	0.233591	0.397683	0.830097	0.0209424	0.0366492	0.0418848	691.5	0.185934	0.698273	0.149796	0.151931	0.814066	0.0267306	0.0412745	0.044192	1.10218	tag healthy nuclei < 50 %
Adavosertib	Multiplex	EUB0000605a	CC(C)(C1=NC(=CC=C1)N2C3=NC(=NC=C3C(=O)N2CC=C)NC4=CC=C(C=C4)N5CCN(CC5)C)O	Chemogenomic candidate	1	24	human fibroblast	2	-0.902173	82	0.292683	0.707317	0.25	0.413793	0.517241	0.0689655	0.75	0.125	0.0833333	0.0416667	80.0833	0.552381	0.346171	0.555718	0.0981105	0.447619	0.11087	0.120814	0.103	231110	tag healthy nuclei < 50 %
Adavosertib	Multiplex	EUB0000605a	CC(C)(C1=NC(=CC=C1)N2C3=NC(=NC=C3C(=O)N2CC=C)NC4=CC=C(C=C4)N5CCN(CC5)C)O	Chemogenomic candidate	1	0	HEK293T	1	0	915	0.177333	0.822667	0.120603	0.429498	0.247974	0.322528	0.879397	0.0150943	0.116981	0.0415094	865.667	0.13691	0.491163	0.230041	0.278796	0.86309	0.0185405	0.129798	0.0320833	#DIV/0!	tag healthy nuclei < 50 %
Adavosertib	Multiplex	EUB0000605a	CC(C)(C1=NC(=CC=C1)N2C3=NC(=NC=C3C(=O)N2CC=C)NC4=CC=C(C=C4)N5CCN(CC5)C)O	Chemogenomic candidate	1	0	human fibroblast	2	0	103	0.339806	0.660194	0.666667	0.382353	0.485294	0.132353	0.333333	0.0769231	0.192308	0	99.3333	0.557903	0.293865	0.595118	0.111016	0.442097	0.112114	0.290215	0.0427216	#DIV/0!	tag healthy nuclei < 50 %
Adavosertib	Multiplex	EUB0000605a	CC(C)(C1=NC(=CC=C1)N2C3=NC(=NC=C3C(=O)N2CC=C)NC4=CC=C(C=C4)N5CCN(CC5)C)O	Chemogenomic candidate	10	12	U2OS	1	-0.993824	167	0.0898204	0.91018	0.402174	0.138158	0.256579	0.605263	0.597826	0.809524	0.47619	0.428571	199.167	0.369403	0.889153	0.0559111	0.0549359	0.630597	0.260916	0.219385	0.107163	1.00798	tag healthy nuclei < 50 %, tag tubulin effect > 50 %
Adavosertib	Multiplex	EUB0000605a	CC(C)(C1=NC(=CC=C1)N2C3=NC(=NC=C3C(=O)N2CC=C)NC4=CC=C(C=C4)N5CCN(CC5)C)O	Chemogenomic candidate	10	24	HEK293T	1	-0.632895	609	0.188834	0.811166	0.210526	0.265182	0.273279	0.461538	0.789474	0.564885	0.328244	0.122137	838.25	0.154355	0.792279	0.137252	0.0704688	0.845645	0.0333863	0.0308318	0.0797788	1.0151	tag healthy nuclei < 50 %, tag tubulin effect > 50 %
Adavosertib	Multiplex	EUB0000605a	CC(C)(C1=NC(=CC=C1)N2C3=NC(=NC=C3C(=O)N2CC=C)NC4=CC=C(C=C4)N5CCN(CC5)C)O	Chemogenomic candidate	10	12	HEK293T	2	-0.670011	1182	0.0296108	0.970389	0.096124	0.278989	0.158675	0.562337	0.903876	0.709375	0.321875	0.04375	1765.83	0.0828653	0.866876	0.0909282	0.0421957	0.917135	0.0464362	0.0760075	0.0151675	0.999314	tag healthy nuclei < 50 %, tag tubulin effect > 50 %
Adavosertib	Multiplex	EUB0000605a	CC(C)(C1=NC(=CC=C1)N2C3=NC(=NC=C3C(=O)N2CC=C)NC4=CC=C(C=C4)N5CCN(CC5)C)O	Chemogenomic candidate	10	12	U2OS	2	-0.944039	76	0.289474	0.710526	0.441176	0.148148	0.222222	0.62963	0.558824	0.75	0.625	0.375	139.167	0.248909	0.881032	0.0702926	0.0486752	0.751091	0.279715	0.240817	0.0972624	1.01342	tag healthy nuclei < 50 %, tag tubulin effect > 50 %, tag mitochondrial mass > 50 %
Adavosertib	Multiplex	EUB0000605a	CC(C)(C1=NC(=CC=C1)N2C3=NC(=NC=C3C(=O)N2CC=C)NC4=CC=C(C=C4)N5CCN(CC5)C)O	Chemogenomic candidate	10	24	HEK293T	2	-0.433686	1042	0.0355086	0.964491	0.206667	0.393035	0.159204	0.447761	0.793333	0.802532	0.536709	0.035443	3025.33	0.160951	0.737455	0.183731	0.0788139	0.839049	0.452063	0.229554	0.0699568	0.474195	tag healthy nuclei < 50 %, tag tubulin effect > 50 %, tag mitochondrial mass > 50 %
Adavosertib	Multiplex	EUB0000605a	CC(C)(C1=NC(=CC=C1)N2C3=NC(=NC=C3C(=O)N2CC=C)NC4=CC=C(C=C4)N5CCN(CC5)C)O	Chemogenomic candidate	10	24	U2OS	1	-0.903754	165	0.133333	0.866667	0.648649	0.118881	0.363636	0.517483	0.351351	0.882353	0.823529	0.764706	276.667	0.370298	0.917275	0.0423433	0.0403816	0.629702	0.31212	0.21103	0.0682442	1.0014	tag healthy nuclei < 50 %, tag tubulin effect > 50 %, tag mitochondrial mass > 50 %, tag membrane permeabilized > 50 %
Adavosertib	Multiplex	EUB0000605a	CC(C)(C1=NC(=CC=C1)N2C3=NC(=NC=C3C(=O)N2CC=C)NC4=CC=C(C=C4)N5CCN(CC5)C)O	Chemogenomic candidate	10	24	U2OS	2	-0.81892	67	0.223881	0.776119	0.681818	0.153846	0.423077	0.423077	0.318182	0.75	0.625	0.75	178.5	0.310463	0.888541	0.0624047	0.049054	0.689537	0.288716	0.291394	0.0647451	1.00514	tag healthy nuclei < 50 %, tag tubulin effect > 50 %, tag mitochondrial mass > 50 %, tag membrane permeabilized > 50 %
Adavosertib	Multiplex	EUB0000605a	CC(C)(C1=NC(=CC=C1)N2C3=NC(=NC=C3C(=O)N2CC=C)NC4=CC=C(C=C4)N5CCN(CC5)C)O	Chemogenomic candidate	1	12	U2OS	1	-0.399381	153	0.0326797	0.96732	0.439024	0.608108	0.114865	0.277027	0.560976	0.211111	0.155556	0.233333	199.167	0.369403	0.889153	0.0559111	0.0549359	0.630597	0.260916	0.219385	0.107163	1.00798
Adavosertib	Multiplex	EUB0000605a	CC(C)(C1=NC(=CC=C1)N2C3=NC(=NC=C3C(=O)N2CC=C)NC4=CC=C(C=C4)N5CCN(CC5)C)O	Chemogenomic candidate	1	24	U2OS	2	-0.252934	149	0.0939597	0.90604	0.5	0.511111	0.222222	0.266667	0.5	0.318841	0.26087	0.217391	178.5	0.310463	0.888541	0.0624047	0.049054	0.689537	0.288716	0.291394	0.0647451	1.00514
Adavosertib	Multiplex	EUB0000605a	CC(C)(C1=NC(=CC=C1)N2C3=NC(=NC=C3C(=O)N2CC=C)NC4=CC=C(C=C4)N5CCN(CC5)C)O	Chemogenomic candidate	1	0	U2OS	1	0	131	0.0305344	0.969466	0.636364	0.858268	0.0551181	0.0866142	0.363636	0.247706	0.137615	0.183486	156.5	0.597808	0.882455	0.0611652	0.0563801	0.402192	0.271242	0.126392	0.10096	0
Adavosertib	Multiplex	EUB0000605a	CC(C)(C1=NC(=CC=C1)N2C3=NC(=NC=C3C(=O)N2CC=C)NC4=CC=C(C=C4)N5CCN(CC5)C)O	Chemogenomic candidate	1	12	U2OS	2	0.0901499	165	0.0545455	0.945455	0.121212	0.628205	0.160256	0.211538	0.878788	0.234694	0.0510204	0.132653	139.167	0.248909	0.881032	0.0702926	0.0486752	0.751091	0.279715	0.240817	0.0972624	1.01342
Adavosertib	Multiplex	EUB0000605a	CC(C)(C1=NC(=CC=C1)N2C3=NC(=NC=C3C(=O)N2CC=C)NC4=CC=C(C=C4)N5CCN(CC5)C)O	Chemogenomic candidate	10	0	U2OS	1	0	167	0.0419162	0.958084	0.25	0.8875	0.0625	0.05	0.75	0.225352	0.147887	0.0915493	156.5	0.597808	0.882455	0.0611652	0.0563801	0.402192	0.271242	0.126392	0.10096	0
Adavosertib	Multiplex	EUB0000605a	CC(C)(C1=NC(=CC=C1)N2C3=NC(=NC=C3C(=O)N2CC=C)NC4=CC=C(C=C4)N5CCN(CC5)C)O	Chemogenomic candidate	1	0	U2OS	2	0	125	0.176	0.824	#DIV/0!	0.902913	0.0970874	0	#DIV/0!	0.193548	0.16129	0.0860215	99.3333	#DIV/0!	0.877466	0.0854137	0.0371199	#DIV/0!	0.27287	0.183282	0.0858335	0
Adavosertib	Multiplex	EUB0000605a	CC(C)(C1=NC(=CC=C1)N2C3=NC(=NC=C3C(=O)N2CC=C)NC4=CC=C(C=C4)N5CCN(CC5)C)O	Chemogenomic candidate	1	12	human fibroblast	1	1.56478	178	0.157303	0.842697	0.692308	0.626667	0.286667	0.0866667	0.307692	0.0638298	0.0425532	0.0744681	230.667	0.695283	0.596796	0.258529	0.144676	0.304717	0.0342007	0.0357415	0.0583164	1.23771
Adavosertib	Multiplex	EUB0000605a	CC(C)(C1=NC(=CC=C1)N2C3=NC(=NC=C3C(=O)N2CC=C)NC4=CC=C(C=C4)N5CCN(CC5)C)O	Chemogenomic candidate	1	24	human fibroblast	1	0.978166	187	0.181818	0.818182	0.833333	0.607843	0.27451	0.117647	0.166667	0.0752688	0.0967742	0.0645161	242.833	0.651394	0.612787	0.255064	0.132149	0.348606	0.025027	0.0173706	0.0467803	1.19614
Adavosertib	Multiplex	EUB0000605a	CC(C)(C1=NC(=CC=C1)N2C3=NC(=NC=C3C(=O)N2CC=C)NC4=CC=C(C=C4)N5CCN(CC5)C)O	Chemogenomic candidate	1	24	HEK293T	2	-0.120706	1164	0.0489691	0.951031	0.163043	0.588076	0.0794941	0.33243	0.836957	0.321045	0.145929	0.0537634	3025.33	0.160951	0.737455	0.183731	0.0788139	0.839049	0.452063	0.229554	0.0699568	0.474195
Adavosertib	Multiplex	EUB0000605a	CC(C)(C1=NC(=CC=C1)N2C3=NC(=NC=C3C(=O)N2CC=C)NC4=CC=C(C=C4)N5CCN(CC5)C)O	Chemogenomic candidate	1	0	human fibroblast	1	0	177	0.0677966	0.932203	0.8	0.527273	0.290909	0.181818	0.2	0.0344828	0.16092	0.045977	211.75	0.805591	0.539397	0.278942	0.181661	0.194409	0.021052	0.100182	0.0283348	#DIV/0!
Adavosertib	Multiplex	EUB0000605a	CC(C)(C1=NC(=CC=C1)N2C3=NC(=NC=C3C(=O)N2CC=C)NC4=CC=C(C=C4)N5CCN(CC5)C)O	Chemogenomic candidate	10	0	U2OS	2	0	78	0.307692	0.692308	#DIV/0!	0.851852	0.148148	0	#DIV/0!	0.326087	0.282609	0.0434783	99.3333	#DIV/0!	0.877466	0.0854137	0.0371199	#DIV/0!	0.27287	0.183282	0.0858335	0
Adavosertib	Multiplex	EUB0000605a	CC(C)(C1=NC(=CC=C1)N2C3=NC(=NC=C3C(=O)N2CC=C)NC4=CC=C(C=C4)N5CCN(CC5)C)O	Chemogenomic candidate	1	12	HEK293T	2	-0.080916	1183	0.035503	0.964497	0.139942	0.629273	0.0701139	0.300613	0.860058	0.153203	0.164345	0.0320334	1765.83	0.0828653	0.866876	0.0909282	0.0421957	0.917135	0.0464362	0.0760075	0.0151675	0.999314
Adavosertib	Multiplex	EUB0000605a	CC(C)(C1=NC(=CC=C1)N2C3=NC(=NC=C3C(=O)N2CC=C)NC4=CC=C(C=C4)N5CCN(CC5)C)O	Chemogenomic candidate	10	0	human fibroblast	1	0	247	0.11336	0.88664	0.617647	0.598174	0.246575	0.155251	0.382353	0.0610687	0.0687023	0.0229008	211.75	0.805591	0.539397	0.278942	0.181661	0.194409	0.021052	0.100182	0.0283348	#DIV/0!
Adavosertib	Multiplex	EUB0000605a	CC(C)(C1=NC(=CC=C1)N2C3=NC(=NC=C3C(=O)N2CC=C)NC4=CC=C(C=C4)N5CCN(CC5)C)O	Chemogenomic candidate	1	0	HEK293T	2	0	1026	0.0331384	0.966862	0.175439	0.779234	0.0483871	0.172379	0.824561	0.00776197	0.318241	0.00258732	1080.25	0.142406	0.776982	0.0533037	0.169714	0.857594	0.00453037	0.323128	0.00113292	#DIV/0!
Adavosertib	Multiplex	EUB0000605a	CC(C)(C1=NC(=CC=C1)N2C3=NC(=NC=C3C(=O)N2CC=C)NC4=CC=C(C=C4)N5CCN(CC5)C)O	Chemogenomic candidate	10	0	HEK293T	2	0	1067	0.0168697	0.98313	0.196319	0.804576	0.0400381	0.155386	0.803681	0.00829384	0.313981	0.00118483	1080.25	0.142406	0.776982	0.0533037	0.169714	0.857594	0.00453037	0.323128	0.00113292	#DIV/0!
Afatinib (dimaleate)	Multiplex	EUB0000596aBDA	CN(C/C=C/C(=O)NC1=C(C=C2N=CN=C(C2=C1)NC3=CC(=C(C=C3)F)Cl)O[C@@H]4COCC4)C.C(=C\C(=O)O)\C(=O)O.C(=C\C(=O)O)\C(=O)O	Chemogenomic candidate	1	12	human fibroblast	2	19122.3	99	0.383838	0.616162	0.454545	0.213115	0.606557	0.180328	0.545455	0.153846	0.307692	0.0769231	84.3333	0.520833	0.311795	0.58592	0.102285	0.479167	0.125354	0.149616	0.0949875	7.64557e+11	tag healthy nuclei < 50 %
Afatinib (dimaleate)	Multiplex	EUB0000596aBDA	CN(C/C=C/C(=O)NC1=C(C=C2N=CN=C(C2=C1)NC3=CC(=C(C=C3)F)Cl)O[C@@H]4COCC4)C.C(=C\C(=O)O)\C(=O)O.C(=C\C(=O)O)\C(=O)O	Chemogenomic candidate	10	0	human fibroblast	2	0	83	0.313253	0.686747	0.833333	0.421053	0.473684	0.105263	0.166667	0.125	0.25	0.0416667	99.3333	0.557903	0.293865	0.595118	0.111016	0.442097	0.112114	0.290215	0.0427216	#DIV/0!	tag healthy nuclei < 50 %
Afatinib (dimaleate)	Multiplex	EUB0000596aBDA	CN(C/C=C/C(=O)NC1=C(C=C2N=CN=C(C2=C1)NC3=CC(=C(C=C3)F)Cl)O[C@@H]4COCC4)C.C(=C\C(=O)O)\C(=O)O.C(=C\C(=O)O)\C(=O)O	Chemogenomic candidate	1	0	HEK293T	1	0	740	0.232468	0.767532	0.103659	0.407783	0.314721	0.277496	0.896341	0.00829876	0.103734	0.0414938	865.667	0.13691	0.491163	0.230041	0.278796	0.86309	0.0185405	0.129798	0.0320833	#DIV/0!	tag healthy nuclei < 50 %
Afatinib (dimaleate)	Multiplex	EUB0000596aBDA	CN(C/C=C/C(=O)NC1=C(C=C2N=CN=C(C2=C1)NC3=CC(=C(C=C3)F)Cl)O[C@@H]4COCC4)C.C(=C\C(=O)O)\C(=O)O.C(=C\C(=O)O)\C(=O)O	Chemogenomic candidate	1	24	human fibroblast	2	0	87	0.344828	0.655172	0.5	0.280702	0.54386	0.175439	0.5	0.125	0.0625	0	80.0833	0.552381	0.346171	0.555718	0.0981105	0.447619	0.11087	0.120814	0.103	231110	tag healthy nuclei < 50 %
Afatinib (dimaleate)	Multiplex	EUB0000596aBDA	CN(C/C=C/C(=O)NC1=C(C=C2N=CN=C(C2=C1)NC3=CC(=C(C=C3)F)Cl)O[C@@H]4COCC4)C.C(=C\C(=O)O)\C(=O)O.C(=C\C(=O)O)\C(=O)O	Chemogenomic candidate	10	24	U2OS	2	-0.473213	146	0.0890411	0.910959	0.9375	0.413534	0.225564	0.360902	0.0625	0.472727	0.727273	0.290909	178.5	0.310463	0.888541	0.0624047	0.049054	0.689537	0.288716	0.291394	0.0647451	1.00514	tag healthy nuclei < 50 %, tag mitochondrial mass > 50 %
Afatinib (dimaleate)	Multiplex	EUB0000596aBDA	CN(C/C=C/C(=O)NC1=C(C=C2N=CN=C(C2=C1)NC3=CC(=C(C=C3)F)Cl)O[C@@H]4COCC4)C.C(=C\C(=O)O)\C(=O)O.C(=C\C(=O)O)\C(=O)O	Chemogenomic candidate	10	24	human fibroblast	2	-0.709454	98	0.357143	0.642857	0.666667	0.365079	0.492063	0.142857	0.333333	0.826087	0.26087	0.347826	80.0833	0.552381	0.346171	0.555718	0.0981105	0.447619	0.11087	0.120814	0.103	231110	tag healthy nuclei < 50 %, tag tubulin effect > 50 %
Afatinib (dimaleate)	Multiplex	EUB0000596aBDA	CN(C/C=C/C(=O)NC1=C(C=C2N=CN=C(C2=C1)NC3=CC(=C(C=C3)F)Cl)O[C@@H]4COCC4)C.C(=C\C(=O)O)\C(=O)O.C(=C\C(=O)O)\C(=O)O	Chemogenomic candidate	10	12	HEK293T	1	-0.87512	647	0.185471	0.814529	0.2397	0.322581	0.170778	0.506641	0.7603	0.823529	0.358824	0.170588	691.5	0.185934	0.698273	0.149796	0.151931	0.814066	0.0267306	0.0412745	0.044192	1.10218	tag healthy nuclei < 50 %, tag tubulin effect > 50 %
Afatinib (dimaleate)	Multiplex	EUB0000596aBDA	CN(C/C=C/C(=O)NC1=C(C=C2N=CN=C(C2=C1)NC3=CC(=C(C=C3)F)Cl)O[C@@H]4COCC4)C.C(=C\C(=O)O)\C(=O)O.C(=C\C(=O)O)\C(=O)O	Chemogenomic candidate	10	12	U2OS	2	-0.619287	143	0.132867	0.867133	0.681818	0.475806	0.169355	0.354839	0.318182	0.864407	0.627119	0.186441	139.167	0.248909	0.881032	0.0702926	0.0486752	0.751091	0.279715	0.240817	0.0972624	1.01342	tag healthy nuclei < 50 %, tag tubulin effect > 50 %, tag mitochondrial mass > 50 %
Afatinib (dimaleate)	Multiplex	EUB0000596aBDA	CN(C/C=C/C(=O)NC1=C(C=C2N=CN=C(C2=C1)NC3=CC(=C(C=C3)F)Cl)O[C@@H]4COCC4)C.C(=C\C(=O)O)\C(=O)O.C(=C\C(=O)O)\C(=O)O	Chemogenomic candidate	10	24	HEK293T	1	-0.52744	637	0.199372	0.800628	0.390698	0.347059	0.231373	0.421569	0.609302	0.774011	0.587571	0.101695	838.25	0.154355	0.792279	0.137252	0.0704688	0.845645	0.0333863	0.0308318	0.0797788	1.0151	tag healthy nuclei < 50 %, tag tubulin effect > 50 %, tag mitochondrial mass > 50 %
Afatinib (dimaleate)	Multiplex	EUB0000596aBDA	CN(C/C=C/C(=O)NC1=C(C=C2N=CN=C(C2=C1)NC3=CC(=C(C=C3)F)Cl)O[C@@H]4COCC4)C.C(=C\C(=O)O)\C(=O)O.C(=C\C(=O)O)\C(=O)O	Chemogenomic candidate	1	0	human fibroblast	2	0	150	0.566667	0.433333	0.75	0.246154	0.630769	0.123077	0.25	0.0625	0.1875	0.0625	99.3333	0.557903	0.293865	0.595118	0.111016	0.442097	0.112114	0.290215	0.0427216	#DIV/0!	tag Hoechst High Intensity, tag healthy nuclei < 50 %
Afatinib (dimaleate)	Multiplex	EUB0000596aBDA	CN(C/C=C/C(=O)NC1=C(C=C2N=CN=C(C2=C1)NC3=CC(=C(C=C3)F)Cl)O[C@@H]4COCC4)C.C(=C\C(=O)O)\C(=O)O.C(=C\C(=O)O)\C(=O)O	Chemogenomic candidate	10	24	U2OS	1	-0.376709	119	0.0840336	0.915966	0.814815	0.651376	0.100917	0.247706	0.185185	0.492958	0.661972	0.267606	276.667	0.370298	0.917275	0.0423433	0.0403816	0.629702	0.31212	0.21103	0.0682442	1.0014	tag mitochondrial mass > 50 %
Afatinib (dimaleate)	Multiplex	EUB0000596aBDA	CN(C/C=C/C(=O)NC1=C(C=C2N=CN=C(C2=C1)NC3=CC(=C(C=C3)F)Cl)O[C@@H]4COCC4)C.C(=C\C(=O)O)\C(=O)O.C(=C\C(=O)O)\C(=O)O	Chemogenomic candidate	10	12	U2OS	1	-0.726176	122	0.0245902	0.97541	0.625	0.563025	0.168067	0.268908	0.375	0.895522	0.373134	0.253731	199.167	0.369403	0.889153	0.0559111	0.0549359	0.630597	0.260916	0.219385	0.107163	1.00798	tag tubulin effect > 50 %
Afatinib (dimaleate)	Multiplex	EUB0000596aBDA	CN(C/C=C/C(=O)NC1=C(C=C2N=CN=C(C2=C1)NC3=CC(=C(C=C3)F)Cl)O[C@@H]4COCC4)C.C(=C\C(=O)O)\C(=O)O.C(=C\C(=O)O)\C(=O)O	Chemogenomic candidate	10	24	human fibroblast	1	-0.280916	217	0.387097	0.612903	0.571429	0.548872	0.293233	0.157895	0.428571	0.616438	0.219178	0.191781	242.833	0.651394	0.612787	0.255064	0.132149	0.348606	0.025027	0.0173706	0.0467803	1.19614	tag tubulin effect > 50 %
Afatinib (dimaleate)	Multiplex	EUB0000596aBDA	CN(C/C=C/C(=O)NC1=C(C=C2N=CN=C(C2=C1)NC3=CC(=C(C=C3)F)Cl)O[C@@H]4COCC4)C.C(=C\C(=O)O)\C(=O)O.C(=C\C(=O)O)\C(=O)O	Chemogenomic candidate	10	12	human fibroblast	1	0.860521	247	0.246964	0.753036	0.585366	0.505376	0.274194	0.22043	0.414634	0.680851	0.12766	0.180851	230.667	0.695283	0.596796	0.258529	0.144676	0.304717	0.0342007	0.0357415	0.0583164	1.23771	tag tubulin effect > 50 %
Afatinib (dimaleate)	Multiplex	EUB0000596aBDA	CN(C/C=C/C(=O)NC1=C(C=C2N=CN=C(C2=C1)NC3=CC(=C(C=C3)F)Cl)O[C@@H]4COCC4)C.C(=C\C(=O)O)\C(=O)O.C(=C\C(=O)O)\C(=O)O	Chemogenomic candidate	10	12	human fibroblast	2	-1	104	0.346154	0.653846	0.222222	0.529412	0.338235	0.132353	0.777778	0.916667	0.138889	0.166667	84.3333	0.520833	0.311795	0.58592	0.102285	0.479167	0.125354	0.149616	0.0949875	7.64557e+11	tag tubulin effect > 50 %
Afatinib (dimaleate)	Multiplex	EUB0000596aBDA	CN(C/C=C/C(=O)NC1=C(C=C2N=CN=C(C2=C1)NC3=CC(=C(C=C3)F)Cl)O[C@@H]4COCC4)C.C(=C\C(=O)O)\C(=O)O.C(=C\C(=O)O)\C(=O)O	Chemogenomic candidate	10	12	HEK293T	2	-0.452798	999	0.04004	0.95996	0.172749	0.535975	0.0354536	0.428571	0.827251	0.978599	0.64786	0.0992218	1765.83	0.0828653	0.866876	0.0909282	0.0421957	0.917135	0.0464362	0.0760075	0.0151675	0.999314	tag tubulin effect > 50 %, tag mitochondrial mass > 50 %
Afatinib (dimaleate)	Multiplex	EUB0000596aBDA	CN(C/C=C/C(=O)NC1=C(C=C2N=CN=C(C2=C1)NC3=CC(=C(C=C3)F)Cl)O[C@@H]4COCC4)C.C(=C\C(=O)O)\C(=O)O.C(=C\C(=O)O)\C(=O)O	Chemogenomic candidate	10	24	HEK293T	2	-0.315537	1048	0.0935115	0.906489	0.255663	0.552632	0.122105	0.325263	0.744337	0.906667	0.695238	0.0666667	3025.33	0.160951	0.737455	0.183731	0.0788139	0.839049	0.452063	0.229554	0.0699568	0.474195	tag tubulin effect > 50 %, tag mitochondrial mass > 50 %
Afatinib (dimaleate)	Multiplex	EUB0000596aBDA	CN(C/C=C/C(=O)NC1=C(C=C2N=CN=C(C2=C1)NC3=CC(=C(C=C3)F)Cl)O[C@@H]4COCC4)C.C(=C\C(=O)O)\C(=O)O.C(=C\C(=O)O)\C(=O)O	Chemogenomic candidate	1	12	U2OS	1	0.430783	164	0.0365854	0.963415	0.5625	0.85443	0.0443038	0.101266	0.4375	0.185185	0.0888889	0.2	199.167	0.369403	0.889153	0.0559111	0.0549359	0.630597	0.260916	0.219385	0.107163	1.00798
Afatinib (dimaleate)	Multiplex	EUB0000596aBDA	CN(C/C=C/C(=O)NC1=C(C=C2N=CN=C(C2=C1)NC3=CC(=C(C=C3)F)Cl)O[C@@H]4COCC4)C.C(=C\C(=O)O)\C(=O)O.C(=C\C(=O)O)\C(=O)O	Chemogenomic candidate	1	24	U2OS	1	0.622418	217	0.0138249	0.986175	0.722222	0.85514	0.0607477	0.0841121	0.277778	0.202186	0.103825	0.163934	276.667	0.370298	0.917275	0.0423433	0.0403816	0.629702	0.31212	0.21103	0.0682442	1.0014
Afatinib (dimaleate)	Multiplex	EUB0000596aBDA	CN(C/C=C/C(=O)NC1=C(C=C2N=CN=C(C2=C1)NC3=CC(=C(C=C3)F)Cl)O[C@@H]4COCC4)C.C(=C\C(=O)O)\C(=O)O.C(=C\C(=O)O)\C(=O)O	Chemogenomic candidate	1	24	U2OS	2	0.794477	168	0.107143	0.892857	0.75	0.873333	0.0733333	0.0533333	0.25	0.244275	0.21374	0.152672	178.5	0.310463	0.888541	0.0624047	0.049054	0.689537	0.288716	0.291394	0.0647451	1.00514
Afatinib (dimaleate)	Multiplex	EUB0000596aBDA	CN(C/C=C/C(=O)NC1=C(C=C2N=CN=C(C2=C1)NC3=CC(=C(C=C3)F)Cl)O[C@@H]4COCC4)C.C(=C\C(=O)O)\C(=O)O.C(=C\C(=O)O)\C(=O)O	Chemogenomic candidate	1	12	U2OS	2	0.950928	142	0.119718	0.880282	0.375	0.864	0.072	0.064	0.625	0.240741	0.185185	0.148148	139.167	0.248909	0.881032	0.0702926	0.0486752	0.751091	0.279715	0.240817	0.0972624	1.01342
Afatinib (dimaleate)	Multiplex	EUB0000596aBDA	CN(C/C=C/C(=O)NC1=C(C=C2N=CN=C(C2=C1)NC3=CC(=C(C=C3)F)Cl)O[C@@H]4COCC4)C.C(=C\C(=O)O)\C(=O)O.C(=C\C(=O)O)\C(=O)O	Chemogenomic candidate	1	12	human fibroblast	1	0.499728	234	0.132479	0.867521	0.666667	0.53202	0.305419	0.162562	0.333333	0.101852	0.037037	0.138889	230.667	0.695283	0.596796	0.258529	0.144676	0.304717	0.0342007	0.0357415	0.0583164	1.23771
Afatinib (dimaleate)	Multiplex	EUB0000596aBDA	CN(C/C=C/C(=O)NC1=C(C=C2N=CN=C(C2=C1)NC3=CC(=C(C=C3)F)Cl)O[C@@H]4COCC4)C.C(=C\C(=O)O)\C(=O)O.C(=C\C(=O)O)\C(=O)O	Chemogenomic candidate	1	0	U2OS	1	0	148	0.0743243	0.925676	0.333333	0.861314	0.0729927	0.0656934	0.666667	0.271186	0.127119	0.127119	156.5	0.597808	0.882455	0.0611652	0.0563801	0.402192	0.271242	0.126392	0.10096	0
Afatinib (dimaleate)	Multiplex	EUB0000596aBDA	CN(C/C=C/C(=O)NC1=C(C=C2N=CN=C(C2=C1)NC3=CC(=C(C=C3)F)Cl)O[C@@H]4COCC4)C.C(=C\C(=O)O)\C(=O)O.C(=C\C(=O)O)\C(=O)O	Chemogenomic candidate	10	0	U2OS	2	0	132	0.0984848	0.901515	1	0.890756	0.092437	0.0168067	0	0.235849	0.235849	0.103774	99.3333	#DIV/0!	0.877466	0.0854137	0.0371199	#DIV/0!	0.27287	0.183282	0.0858335	0
Afatinib (dimaleate)	Multiplex	EUB0000596aBDA	CN(C/C=C/C(=O)NC1=C(C=C2N=CN=C(C2=C1)NC3=CC(=C(C=C3)F)Cl)O[C@@H]4COCC4)C.C(=C\C(=O)O)\C(=O)O.C(=C\C(=O)O)\C(=O)O	Chemogenomic candidate	1	0	U2OS	2	0	106	0.216981	0.783019	0	0.86747	0.108434	0.0240964	1	0.305556	0.263889	0.0972222	99.3333	#DIV/0!	0.877466	0.0854137	0.0371199	#DIV/0!	0.27287	0.183282	0.0858335	0
Afatinib (dimaleate)	Multiplex	EUB0000596aBDA	CN(C/C=C/C(=O)NC1=C(C=C2N=CN=C(C2=C1)NC3=CC(=C(C=C3)F)Cl)O[C@@H]4COCC4)C.C(=C\C(=O)O)\C(=O)O.C(=C\C(=O)O)\C(=O)O	Chemogenomic candidate	1	24	HEK293T	1	0.67907	598	0.107023	0.892977	0.258065	0.71161	0.172285	0.116105	0.741935	0.0763158	0.0342105	0.0605263	838.25	0.154355	0.792279	0.137252	0.0704688	0.845645	0.0333863	0.0308318	0.0797788	1.0151
Afatinib (dimaleate)	Multiplex	EUB0000596aBDA	CN(C/C=C/C(=O)NC1=C(C=C2N=CN=C(C2=C1)NC3=CC(=C(C=C3)F)Cl)O[C@@H]4COCC4)C.C(=C\C(=O)O)\C(=O)O.C(=C\C(=O)O)\C(=O)O	Chemogenomic candidate	1	12	HEK293T	1	0.326494	581	0.156627	0.843373	0.268519	0.540816	0.238776	0.220408	0.731481	0.0566038	0.045283	0.0566038	691.5	0.185934	0.698273	0.149796	0.151931	0.814066	0.0267306	0.0412745	0.044192	1.10218
Afatinib (dimaleate)	Multiplex	EUB0000596aBDA	CN(C/C=C/C(=O)NC1=C(C=C2N=CN=C(C2=C1)NC3=CC(=C(C=C3)F)Cl)O[C@@H]4COCC4)C.C(=C\C(=O)O)\C(=O)O.C(=C\C(=O)O)\C(=O)O	Chemogenomic candidate	1	24	human fibroblast	1	0.321318	247	0.186235	0.813765	0.727273	0.532338	0.358209	0.109453	0.272727	0.130841	0.0747664	0.0560748	242.833	0.651394	0.612787	0.255064	0.132149	0.348606	0.025027	0.0173706	0.0467803	1.19614
Afatinib (dimaleate)	Multiplex	EUB0000596aBDA	CN(C/C=C/C(=O)NC1=C(C=C2N=CN=C(C2=C1)NC3=CC(=C(C=C3)F)Cl)O[C@@H]4COCC4)C.C(=C\C(=O)O)\C(=O)O.C(=C\C(=O)O)\C(=O)O	Chemogenomic candidate	10	0	U2OS	1	0	124	0.0241935	0.975806	0.333333	0.900826	0.0495868	0.0495868	0.666667	0.100917	0.0642202	0.0458716	156.5	0.597808	0.882455	0.0611652	0.0563801	0.402192	0.271242	0.126392	0.10096	0
Afatinib (dimaleate)	Multiplex	EUB0000596aBDA	CN(C/C=C/C(=O)NC1=C(C=C2N=CN=C(C2=C1)NC3=CC(=C(C=C3)F)Cl)O[C@@H]4COCC4)C.C(=C\C(=O)O)\C(=O)O.C(=C\C(=O)O)\C(=O)O	Chemogenomic candidate	1	24	HEK293T	2	0.864477	2098	0.034795	0.965205	0.123077	0.762469	0.205432	0.0320988	0.876923	0.0977979	0.0375648	0.0420984	3025.33	0.160951	0.737455	0.183731	0.0788139	0.839049	0.452063	0.229554	0.0699568	0.474195
Afatinib (dimaleate)	Multiplex	EUB0000596aBDA	CN(C/C=C/C(=O)NC1=C(C=C2N=CN=C(C2=C1)NC3=CC(=C(C=C3)F)Cl)O[C@@H]4COCC4)C.C(=C\C(=O)O)\C(=O)O.C(=C\C(=O)O)\C(=O)O	Chemogenomic candidate	1	12	HEK293T	2	0.767538	1304	0.0329755	0.967025	0.162162	0.877082	0.0642347	0.0586836	0.837838	0.105787	0.138336	0.0406872	1765.83	0.0828653	0.866876	0.0909282	0.0421957	0.917135	0.0464362	0.0760075	0.0151675	0.999314
Afatinib (dimaleate)	Multiplex	EUB0000596aBDA	CN(C/C=C/C(=O)NC1=C(C=C2N=CN=C(C2=C1)NC3=CC(=C(C=C3)F)Cl)O[C@@H]4COCC4)C.C(=C\C(=O)O)\C(=O)O.C(=C\C(=O)O)\C(=O)O	Chemogenomic candidate	10	0	human fibroblast	1	0	193	0.0984456	0.901554	0.862069	0.603448	0.229885	0.166667	0.137931	0.0190476	0.0952381	0.0285714	211.75	0.805591	0.539397	0.278942	0.181661	0.194409	0.021052	0.100182	0.0283348	#DIV/0!
Afatinib (dimaleate)	Multiplex	EUB0000596aBDA	CN(C/C=C/C(=O)NC1=C(C=C2N=CN=C(C2=C1)NC3=CC(=C(C=C3)F)Cl)O[C@@H]4COCC4)C.C(=C\C(=O)O)\C(=O)O.C(=C\C(=O)O)\C(=O)O	Chemogenomic candidate	1	0	human fibroblast	1	0	200	0.045	0.955	0.777778	0.596859	0.26178	0.141361	0.222222	0.00877193	0.0701754	0.0175439	211.75	0.805591	0.539397	0.278942	0.181661	0.194409	0.021052	0.100182	0.0283348	#DIV/0!
Afatinib (dimaleate)	Multiplex	EUB0000596aBDA	CN(C/C=C/C(=O)NC1=C(C=C2N=CN=C(C2=C1)NC3=CC(=C(C=C3)F)Cl)O[C@@H]4COCC4)C.C(=C\C(=O)O)\C(=O)O.C(=C\C(=O)O)\C(=O)O	Chemogenomic candidate	10	0	HEK293T	1	0	949	0.203509	0.796491	0.155963	0.502203	0.17768	0.320117	0.844037	0.0146199	0.157895	0.0146199	865.667	0.13691	0.491163	0.230041	0.278796	0.86309	0.0185405	0.129798	0.0320833	#DIV/0!
Afatinib (dimaleate)	Multiplex	EUB0000596aBDA	CN(C/C=C/C(=O)NC1=C(C=C2N=CN=C(C2=C1)NC3=CC(=C(C=C3)F)Cl)O[C@@H]4COCC4)C.C(=C\C(=O)O)\C(=O)O.C(=C\C(=O)O)\C(=O)O	Chemogenomic candidate	10	0	HEK293T	2	0	1129	0.0283437	0.971656	0.172414	0.793984	0.047402	0.158614	0.827586	0.00459242	0.305396	0.00229621	1080.25	0.142406	0.776982	0.0533037	0.169714	0.857594	0.00453037	0.323128	0.00113292	#DIV/0!
Afatinib (dimaleate)	Multiplex	EUB0000596aBDA	CN(C/C=C/C(=O)NC1=C(C=C2N=CN=C(C2=C1)NC3=CC(=C(C=C3)F)Cl)O[C@@H]4COCC4)C.C(=C\C(=O)O)\C(=O)O.C(=C\C(=O)O)\C(=O)O	Chemogenomic candidate	1	0	HEK293T	2	0	939	0.0319489	0.968051	0.160221	0.739274	0.0616062	0.19912	0.839779	0.00297619	0.276786	0.0014881	1080.25	0.142406	0.776982	0.0533037	0.169714	0.857594	0.00453037	0.323128	0.00113292	#DIV/0!
AH 7614	Multiplex	EUB0000515a	CC1=CC=C(C=C1)S(=O)(=O)NC1C2=C(OC3=C1C=CC=C3)C=CC=C2	Chemogenomic candidate	10	12	U2OS	2	-0.772403	106	0.0660377	0.933962	0.956522	0.343434	0.424242	0.232323	0.0434783	0.5	0	0.441176	78.3333	0.502249	0.830741	0.0963907	0.0728682	0.497751	0.154861	0.0827165	0.0293447	1.11609	tag healthy nuclei < 50 %
AH 7614	Multiplex	EUB0000515a	CC1=CC=C(C=C1)S(=O)(=O)NC1C2=C(OC3=C1C=CC=C3)C=CC=C2	Chemogenomic candidate	10	12	human fibroblast	2	-0.772403	106	0.0660377	0.933962	0.956522	0.343434	0.424242	0.232323	0.0434783	0.5	0	0.441176	106.333	0.502249	0.830741	0.0963907	0.0728682	0.497751	0.154861	0.0827165	0.0293447	1.11609	tag healthy nuclei < 50 %
AH 7614	Multiplex	EUB0000515a	CC1=CC=C(C=C1)S(=O)(=O)NC1C2=C(OC3=C1C=CC=C3)C=CC=C2	Chemogenomic candidate	10	24	U2OS	1	1.06267	321	0.0685358	0.931464	0.714286	0.277592	0.698997	0.0234114	0.285714	0.192771	0.180723	0.349398	212.417	0.319581	0.825187	0.0885786	0.0862345	0.680419	0.098522	0.0722682	0.0503222	0.99162	tag healthy nuclei < 50 %
AH 7614	Multiplex	EUB0000515a	CC1=CC=C(C=C1)S(=O)(=O)NC1C2=C(OC3=C1C=CC=C3)C=CC=C2	Chemogenomic candidate	1	12	human fibroblast	1	1.7387	105	0.114286	0.885714	0.576923	0.462366	0.258065	0.27957	0.423077	0.27907	0.0697674	0.255814	107.083	0.631736	0.44459	0.220734	0.334676	0.368264	0.315502	0.0769574	0.274792	1.29875	tag healthy nuclei < 50 %
AH 7614	Multiplex	EUB0000515a	CC1=CC=C(C=C1)S(=O)(=O)NC1C2=C(OC3=C1C=CC=C3)C=CC=C2	Chemogenomic candidate	1	12	HEK293T	2	1.123	179	0.027933	0.972067	0.21519	0.494253	0.0517241	0.454023	0.78481	0.22093	0.0930233	0.174419	256.75	0.112092	0.454373	0.0637918	0.481836	0.887908	0.182057	0.132768	0.0724535	1.03765	tag healthy nuclei < 50 %
AH 7614	Multiplex	EUB0000515a	CC1=CC=C(C=C1)S(=O)(=O)NC1C2=C(OC3=C1C=CC=C3)C=CC=C2	Chemogenomic candidate	10	12	HEK293T	2	1.38192	307	0.0521173	0.947883	0.16129	0.343643	0.33677	0.319588	0.83871	0.49	0.33	0.12	256.75	0.112092	0.454373	0.0637918	0.481836	0.887908	0.182057	0.132768	0.0724535	1.03765	tag healthy nuclei < 50 %
AH 7614	Multiplex	EUB0000515a	CC1=CC=C(C=C1)S(=O)(=O)NC1C2=C(OC3=C1C=CC=C3)C=CC=C2	Chemogenomic candidate	1	24	U2OS	1	-0.824868	132	0	1	0.590909	0.257576	0.575758	0.166667	0.409091	0.0588235	0.176471	0.117647	212.417	0.319581	0.825187	0.0885786	0.0862345	0.680419	0.098522	0.0722682	0.0503222	0.99162	tag healthy nuclei < 50 %
AH 7614	Multiplex	EUB0000515a	CC1=CC=C(C=C1)S(=O)(=O)NC1C2=C(OC3=C1C=CC=C3)C=CC=C2	Chemogenomic candidate	1	0	human fibroblast	1	0	116	0.103448	0.896552	0.636364	0.298077	0.384615	0.317308	0.363636	0.16129	0.129032	0.0322581	125.417	0.662404	0.310276	0.328567	0.361157	0.337596	0.203306	0.230525	0.0840641	#DIV/0!	tag healthy nuclei < 50 %
AH 7614	Multiplex	EUB0000515a	CC1=CC=C(C=C1)S(=O)(=O)NC1C2=C(OC3=C1C=CC=C3)C=CC=C2	Chemogenomic candidate	1	48	HEK293T	1	2.41563	465	0.129032	0.870968	0.342657	0.466667	0.180247	0.353086	0.657343	0.285714	0.26455	0.026455	351.333	0.392717	0.429172	0.195155	0.375673	0.607283	0.266274	0.27356	0.0493784	0.987254	tag healthy nuclei < 50 %
AH 7614	Multiplex	EUB0000515a	CC1=CC=C(C=C1)S(=O)(=O)NC1C2=C(OC3=C1C=CC=C3)C=CC=C2	Chemogenomic candidate	10	0	HEK293T	2	0	188	0.0691489	0.930851	0.0666667	0.222857	0.0914286	0.685714	0.933333	0.0512821	0.25641	0.025641	233.167	0.0929753	0.24237	0.0798532	0.677777	0.907025	0.0412417	0.171457	0.0110984	#DIV/0!	tag healthy nuclei < 50 %
AH 7614	Multiplex	EUB0000515a	CC1=CC=C(C=C1)S(=O)(=O)NC1C2=C(OC3=C1C=CC=C3)C=CC=C2	Chemogenomic candidate	10	0	human fibroblast	1	0	137	0.153285	0.846715	0.709091	0.310345	0.215517	0.474138	0.290909	0.305556	0.194444	0	125.417	0.662404	0.310276	0.328567	0.361157	0.337596	0.203306	0.230525	0.0840641	#DIV/0!	tag healthy nuclei < 50 %
AH 7614	Multiplex	EUB0000515a	CC1=CC=C(C=C1)S(=O)(=O)NC1C2=C(OC3=C1C=CC=C3)C=CC=C2	Chemogenomic candidate	1	0	HEK293T	2	0	175	0.0457143	0.954286	0.162162	0.227545	0.107784	0.664671	0.837838	0	0.131579	0	233.167	0.0929753	0.24237	0.0798532	0.677777	0.907025	0.0412417	0.171457	0.0110984	#DIV/0!	tag healthy nuclei < 50 %
AH 7614	Multiplex	EUB0000515a	CC1=CC=C(C=C1)S(=O)(=O)NC1C2=C(OC3=C1C=CC=C3)C=CC=C2	Chemogenomic candidate	1	24	HEK293T	1	1.71105	392	0.132653	0.867347	0.411348	0.479412	0.105882	0.414706	0.588652	0.417178	0.552147	0.0490798	293.167	0.429543	0.395461	0.147538	0.457001	0.570457	0.312274	0.510446	0.0420248	1.14297	tag healthy nuclei < 50 %, tag mitochondrial mass > 50 %
AH 7614	Multiplex	EUB0000515a	CC1=CC=C(C=C1)S(=O)(=O)NC1C2=C(OC3=C1C=CC=C3)C=CC=C2	Chemogenomic candidate	1	12	HEK293T	1	1.83778	362	0.110497	0.889503	0.468531	0.440994	0.114907	0.444099	0.531469	0.274648	0.647887	0.0211268	274.667	0.427177	0.372026	0.131275	0.496699	0.572823	0.324854	0.687273	0.0469186	1.209	tag healthy nuclei < 50 %, tag mitochondrial mass > 50 %
AH 7614	Multiplex	EUB0000515a	CC1=CC=C(C=C1)S(=O)(=O)NC1C2=C(OC3=C1C=CC=C3)C=CC=C2	Chemogenomic candidate	1	0	HEK293T	1	0	311	0.073955	0.926045	0.352941	0.211806	0.0798611	0.708333	0.647059	0.0163934	0.852459	0	256.5	0.333294	0.212413	0.0958204	0.691766	0.666706	0.0141172	0.774309	0.00115741	#DIV/0!	tag healthy nuclei < 50 %, tag mitochondrial mass > 50 %
AH 7614	Multiplex	EUB0000515a	CC1=CC=C(C=C1)S(=O)(=O)NC1C2=C(OC3=C1C=CC=C3)C=CC=C2	Chemogenomic candidate	10	0	HEK293T	1	0	281	0.120996	0.879004	0.45122	0.234818	0.101215	0.663968	0.54878	0.0172414	0.827586	0	256.5	0.333294	0.212413	0.0958204	0.691766	0.666706	0.0141172	0.774309	0.00115741	#DIV/0!	tag healthy nuclei < 50 %, tag mitochondrial mass > 50 %
AH 7614	Multiplex	EUB0000515a	CC1=CC=C(C=C1)S(=O)(=O)NC1C2=C(OC3=C1C=CC=C3)C=CC=C2	Chemogenomic candidate	10	12	human fibroblast	1	8.19401	218	0.178899	0.821101	0.8	0.413408	0.418994	0.167598	0.2	0.175676	0.540541	0.567568	107.083	0.631736	0.44459	0.220734	0.334676	0.368264	0.315502	0.0769574	0.274792	1.29875	tag healthy nuclei < 50 %, tag mitochondrial mass > 50 %, tag membrane permeabilized > 50 %
AH 7614	Multiplex	EUB0000515a	CC1=CC=C(C=C1)S(=O)(=O)NC1C2=C(OC3=C1C=CC=C3)C=CC=C2	Chemogenomic candidate	10	12	U2OS	1	1.14647	507	0.0710059	0.928994	0.714286	0.127389	0.842887	0.029724	0.285714	0.683333	0.283333	0.716667	165.75	0.37331	0.780206	0.114105	0.10569	0.62669	0.0951184	0.0845665	0.073208	1.05123	tag healthy nuclei < 50 %, tag tubulin effect > 50 %, tag membrane permeabilized > 50 %
AH 7614	Multiplex	EUB0000515a	CC1=CC=C(C=C1)S(=O)(=O)NC1C2=C(OC3=C1C=CC=C3)C=CC=C2	Chemogenomic candidate	10	12	HEK293T	1	1.73394	398	0.110553	0.889447	0.59633	0.370056	0.322034	0.30791	0.40367	0.748092	0.862595	0.0381679	274.667	0.427177	0.372026	0.131275	0.496699	0.572823	0.324854	0.687273	0.0469186	1.209	tag healthy nuclei < 50 %, tag tubulin effect > 50 %, tag mitochondrial mass > 50 %
AH 7614	Multiplex	EUB0000515a	CC1=CC=C(C=C1)S(=O)(=O)NC1C2=C(OC3=C1C=CC=C3)C=CC=C2	Chemogenomic candidate	10	24	human fibroblast	1	3.46834	170	0.164706	0.835294	0.75	0.535211	0.352113	0.112676	0.25	0.289474	0.434211	0.644737	106.75	0.494315	0.513538	0.210808	0.275654	0.505685	0.339408	0.0326339	0.298699	1.11839	tag membrane permeabilized > 50 %
AH 7614	Multiplex	EUB0000515a	CC1=CC=C(C=C1)S(=O)(=O)NC1C2=C(OC3=C1C=CC=C3)C=CC=C2	Chemogenomic candidate	1	24	human fibroblast	1	1.5024	119	0.193277	0.806723	0.5	0.510417	0.260417	0.229167	0.5	0.530612	0.102041	0.285714	106.75	0.494315	0.513538	0.210808	0.275654	0.505685	0.339408	0.0326339	0.298699	1.11839	tag tubulin effect > 50 %
AH 7614	Multiplex	EUB0000515a	CC1=CC=C(C=C1)S(=O)(=O)NC1C2=C(OC3=C1C=CC=C3)C=CC=C2	Chemogenomic candidate	10	24	HEK293T	1	2.1378	362	0.107735	0.892265	0.55	0.55418	0.136223	0.309598	0.45	0.558659	0.681564	0.0782123	293.167	0.429543	0.395461	0.147538	0.457001	0.570457	0.312274	0.510446	0.0420248	1.14297	tag tubulin effect > 50 %, tag mitochondrial mass > 50 %
AH 7614	Multiplex	EUB0000515a	CC1=CC=C(C=C1)S(=O)(=O)NC1C2=C(OC3=C1C=CC=C3)C=CC=C2	Chemogenomic candidate	10	48	human fibroblast	2	0.119656	84	0.142857	0.857143	0.8	0.722222	0.208333	0.0694444	0.2	0.5	0.0384615	0.25	108	0.498611	0.755765	0.214424	0.0298114	0.501389	0.304063	0.0278827	0.153127	1.11404
AH 7614	Multiplex	EUB0000515a	CC1=CC=C(C=C1)S(=O)(=O)NC1C2=C(OC3=C1C=CC=C3)C=CC=C2	Chemogenomic candidate	1	24	HEK293T	2	0.878462	239	0.0125523	0.987448	0.22093	0.550847	0.0847458	0.364407	0.77907	0.292308	0.123077	0.230769	322.417	0.125402	0.652444	0.053119	0.294437	0.874598	0.274867	0.112063	0.0970907	1.01358
AH 7614	Multiplex	EUB0000515a	CC1=CC=C(C=C1)S(=O)(=O)NC1C2=C(OC3=C1C=CC=C3)C=CC=C2	Chemogenomic candidate	1	48	human fibroblast	1	-0.636278	111	0.198198	0.801802	0.428571	0.505618	0.337079	0.157303	0.571429	0.377778	0.0444444	0.222222	110.667	0.531499	0.514801	0.276708	0.208491	0.468501	0.298464	0.0241518	0.276892	5.201
AH 7614	Multiplex	EUB0000515a	CC1=CC=C(C=C1)S(=O)(=O)NC1C2=C(OC3=C1C=CC=C3)C=CC=C2	Chemogenomic candidate	10	48	human fibroblast	1	-0.893769	133	0.075188	0.924812	0.428571	0.666667	0.276423	0.0569106	0.571429	0.268293	0.0243902	0.207317	110.667	0.531499	0.514801	0.276708	0.208491	0.468501	0.298464	0.0241518	0.276892	5.201
AH 7614	Multiplex	EUB0000515a	CC1=CC=C(C=C1)S(=O)(=O)NC1C2=C(OC3=C1C=CC=C3)C=CC=C2	Chemogenomic candidate	10	24	U2OS	2	0.292984	84	0.047619	0.952381	1	0.6875	0.1	0.2125	0	0.436364	0.145455	0.2	102.167	0.521098	0.831195	0.0931875	0.0756178	0.478902	0.166245	0.0748286	0.0347485	1.01542
AH 7614	Multiplex	EUB0000515a	CC1=CC=C(C=C1)S(=O)(=O)NC1C2=C(OC3=C1C=CC=C3)C=CC=C2	Chemogenomic candidate	10	24	human fibroblast	2	0.292984	84	0.047619	0.952381	1	0.6875	0.1	0.2125	0	0.436364	0.145455	0.2	108.083	0.521098	0.831195	0.0931875	0.0756178	0.478902	0.166245	0.0748286	0.0347485	1.01542
AH 7614	Multiplex	EUB0000515a	CC1=CC=C(C=C1)S(=O)(=O)NC1C2=C(OC3=C1C=CC=C3)C=CC=C2	Chemogenomic candidate	10	48	U2OS	2	0.626352	109	0.0458716	0.954128	0.75	0.846154	0.0769231	0.0769231	0.25	0.375	0.147727	0.170455	153.583	0.433939	0.864953	0.0805245	0.0545227	0.566061	0.197701	0.115167	0.0429551	1.00576
AH 7614	Multiplex	EUB0000515a	CC1=CC=C(C=C1)S(=O)(=O)NC1C2=C(OC3=C1C=CC=C3)C=CC=C2	Chemogenomic candidate	1	48	human fibroblast	2	0.782951	68	0.147059	0.852941	0.75	0.758621	0.172414	0.0689655	0.25	0.340909	0.0681818	0.159091	108	0.498611	0.755765	0.214424	0.0298114	0.501389	0.304063	0.0278827	0.153127	1.11404
AH 7614	Multiplex	EUB0000515a	CC1=CC=C(C=C1)S(=O)(=O)NC1C2=C(OC3=C1C=CC=C3)C=CC=C2	Chemogenomic candidate	1	48	HEK293T	2	1.03006	466	0.0321888	0.967811	0.137931	0.789357	0.0820399	0.128603	0.862069	0.286517	0.0365169	0.117978	594.833	0.0998693	0.826482	0.0664568	0.107061	0.900131	0.232673	0.0431769	0.0808889	1.00265
AH 7614	Multiplex	EUB0000515a	CC1=CC=C(C=C1)S(=O)(=O)NC1C2=C(OC3=C1C=CC=C3)C=CC=C2	Chemogenomic candidate	1	48	U2OS	2	0.89332	93	0.0215054	0.978495	0.25	0.901099	0.0549451	0.043956	0.75	0.109756	0.182927	0.109756	153.583	0.433939	0.864953	0.0805245	0.0545227	0.566061	0.197701	0.115167	0.0429551	1.00576
AH 7614	Multiplex	EUB0000515a	CC1=CC=C(C=C1)S(=O)(=O)NC1C2=C(OC3=C1C=CC=C3)C=CC=C2	Chemogenomic candidate	10	24	HEK293T	2	0.953388	283	0.0388693	0.961131	0.173469	0.529412	0.110294	0.360294	0.826531	0.472222	0.3125	0.0972222	322.417	0.125402	0.652444	0.053119	0.294437	0.874598	0.274867	0.112063	0.0970907	1.01358
AH 7614	Multiplex	EUB0000515a	CC1=CC=C(C=C1)S(=O)(=O)NC1C2=C(OC3=C1C=CC=C3)C=CC=C2	Chemogenomic candidate	10	0	U2OS	1	0	82	0.121951	0.878049	0.125	0.666667	0.222222	0.111111	0.875	0.0833333	0.270833	0.0833333	152.167	0.315784	0.706662	0.13121	0.162128	0.684216	0.118789	0.261243	0.0625529	0
AH 7614	Multiplex	EUB0000515a	CC1=CC=C(C=C1)S(=O)(=O)NC1C2=C(OC3=C1C=CC=C3)C=CC=C2	Chemogenomic candidate	1	0	human fibroblast	2	0	77	0.207792	0.792208	0.428571	0.590164	0.295082	0.114754	0.571429	0.222222	0.111111	0.0833333	101.167	0.681754	0.642258	0.240072	0.11767	0.318246	0.20189	0.247166	0.0567674	#DIV/0!
AH 7614	Multiplex	EUB0000515a	CC1=CC=C(C=C1)S(=O)(=O)NC1C2=C(OC3=C1C=CC=C3)C=CC=C2	Chemogenomic candidate	1	24	U2OS	2	0.881862	65	0.0769231	0.923077	0.25	0.883333	0.05	0.0666667	0.75	0.132075	0.150943	0.0754717	102.167	0.521098	0.831195	0.0931875	0.0756178	0.478902	0.166245	0.0748286	0.0347485	1.01542
AH 7614	Multiplex	EUB0000515a	CC1=CC=C(C=C1)S(=O)(=O)NC1C2=C(OC3=C1C=CC=C3)C=CC=C2	Chemogenomic candidate	1	24	human fibroblast	2	0.881862	65	0.0769231	0.923077	0.25	0.883333	0.05	0.0666667	0.75	0.132075	0.150943	0.0754717	108.083	0.521098	0.831195	0.0931875	0.0756178	0.478902	0.166245	0.0748286	0.0347485	1.01542
AH 7614	Multiplex	EUB0000515a	CC1=CC=C(C=C1)S(=O)(=O)NC1C2=C(OC3=C1C=CC=C3)C=CC=C2	Chemogenomic candidate	1	12	U2OS	1	1.15806	216	0.0555556	0.944444	0.47619	0.779412	0.117647	0.102941	0.52381	0.0566038	0.0503145	0.0691824	165.75	0.37331	0.780206	0.114105	0.10569	0.62669	0.0951184	0.0845665	0.073208	1.05123
AH 7614	Multiplex	EUB0000515a	CC1=CC=C(C=C1)S(=O)(=O)NC1C2=C(OC3=C1C=CC=C3)C=CC=C2	Chemogenomic candidate	10	48	HEK293T	2	0.840404	374	0.0240642	0.975936	0.123457	0.734247	0.0438356	0.221918	0.876543	0.455224	0.201493	0.0671642	594.833	0.0998693	0.826482	0.0664568	0.107061	0.900131	0.232673	0.0431769	0.0808889	1.00265
AH 7614	Multiplex	EUB0000515a	CC1=CC=C(C=C1)S(=O)(=O)NC1C2=C(OC3=C1C=CC=C3)C=CC=C2	Chemogenomic candidate	10	0	U2OS	2	0	72	0.0555556	0.944444	0.375	0.691176	0.191176	0.117647	0.625	0.148936	0.148936	0.0425532	70.3333	0.262184	0.811025	0.0807672	0.108207	0.737816	0.0985605	0.153729	0.0272522	0
AH 7614	Multiplex	EUB0000515a	CC1=CC=C(C=C1)S(=O)(=O)NC1C2=C(OC3=C1C=CC=C3)C=CC=C2	Chemogenomic candidate	10	48	U2OS	1	0.485847	155	0.0322581	0.967742	0.444444	0.826667	0.113333	0.06	0.555556	0.120968	0.120968	0.0322581	330	0.352767	0.881662	0.0538695	0.0644681	0.647233	0.102719	0.0952982	0.0225671	1.00252
AH 7614	Multiplex	EUB0000515a	CC1=CC=C(C=C1)S(=O)(=O)NC1C2=C(OC3=C1C=CC=C3)C=CC=C2	Chemogenomic candidate	10	48	HEK293T	1	3.46219	453	0.0883002	0.9117	0.369048	0.66586	0.130751	0.20339	0.630952	0.385455	0.276364	0.0290909	351.333	0.392717	0.429172	0.195155	0.375673	0.607283	0.266274	0.27356	0.0493784	0.987254
AH 7614	Multiplex	EUB0000515a	CC1=CC=C(C=C1)S(=O)(=O)NC1C2=C(OC3=C1C=CC=C3)C=CC=C2	Chemogenomic candidate	1	0	U2OS	1	0	186	0.0645161	0.935484	0.448276	0.729885	0.103448	0.166667	0.551724	0.11811	0.377953	0.023622	152.167	0.315784	0.706662	0.13121	0.162128	0.684216	0.118789	0.261243	0.0625529	0
AH 7614	Multiplex	EUB0000515a	CC1=CC=C(C=C1)S(=O)(=O)NC1C2=C(OC3=C1C=CC=C3)C=CC=C2	Chemogenomic candidate	10	0	human fibroblast	2	0	89	0.11236	0.88764	0.5	0.632911	0.291139	0.0759494	0.5	0.22	0.24	0.02	101.167	0.681754	0.642258	0.240072	0.11767	0.318246	0.20189	0.247166	0.0567674	#DIV/0!
AH 7614	Multiplex	EUB0000515a	CC1=CC=C(C=C1)S(=O)(=O)NC1C2=C(OC3=C1C=CC=C3)C=CC=C2	Chemogenomic candidate	1	48	U2OS	1	1.54505	429	0.027972	0.972028	0.5	0.851319	0.0863309	0.0623501	0.5	0.0309859	0.0788732	0.0084507	330	0.352767	0.881662	0.0538695	0.0644681	0.647233	0.102719	0.0952982	0.0225671	1.00252
AH 7614	Multiplex	EUB0000515a	CC1=CC=C(C=C1)S(=O)(=O)NC1C2=C(OC3=C1C=CC=C3)C=CC=C2	Chemogenomic candidate	1	12	U2OS	2	0	49	0.0408163	0.959184	0	0.765957	0.106383	0.12766	1	0.0277778	0.166667	0	78.3333	0.502249	0.830741	0.0963907	0.0728682	0.497751	0.154861	0.0827165	0.0293447	1.11609
AH 7614	Multiplex	EUB0000515a	CC1=CC=C(C=C1)S(=O)(=O)NC1C2=C(OC3=C1C=CC=C3)C=CC=C2	Chemogenomic candidate	1	12	human fibroblast	2	0	49	0.0408163	0.959184	0	0.765957	0.106383	0.12766	1	0.0277778	0.166667	0	106.333	0.502249	0.830741	0.0963907	0.0728682	0.497751	0.154861	0.0827165	0.0293447	1.11609
AH 7614	Multiplex	EUB0000515a	CC1=CC=C(C=C1)S(=O)(=O)NC1C2=C(OC3=C1C=CC=C3)C=CC=C2	Chemogenomic candidate	1	0	U2OS	2	0	48	0.0416667	0.958333	0.6	0.782609	0.108696	0.108696	0.4	0.0555556	0.138889	0	70.3333	0.262184	0.811025	0.0807672	0.108207	0.737816	0.0985605	0.153729	0.0272522	0
AHPN	Multiplex	EUB0000568a	C1C2CC3CC1CC(C2)(C3)C4=C(C=CC(=C4)C5=CC6=C(C=C5)C=C(C=C6)C(=O)O)O	Chemogenomic candidate	10	12	human fibroblast	1	1.42485	115	0.165217	0.834783	0.724138	0.375	0.322917	0.302083	0.275862	0.333333	0	0.444444	107.083	0.631736	0.44459	0.220734	0.334676	0.368264	0.315502	0.0769574	0.274792	1.29875	tag healthy nuclei < 50 %
AHPN	Multiplex	EUB0000568a	C1C2CC3CC1CC(C2)(C3)C4=C(C=CC(=C4)C5=CC6=C(C=C5)C=C(C=C6)C(=O)O)O	Chemogenomic candidate	10	48	human fibroblast	1	6.08927	116	0.206897	0.793103	0.857143	0.402174	0.521739	0.076087	0.142857	0.351351	0	0.351351	110.667	0.531499	0.514801	0.276708	0.208491	0.468501	0.298464	0.0241518	0.276892	5.201	tag healthy nuclei < 50 %
AHPN	Multiplex	EUB0000568a	C1C2CC3CC1CC(C2)(C3)C4=C(C=CC(=C4)C5=CC6=C(C=C5)C=C(C=C6)C(=O)O)O	Chemogenomic candidate	1	24	human fibroblast	1	-0.564083	236	0.237288	0.762712	0.531646	0.205556	0.355556	0.438889	0.468354	0.459459	0.189189	0.297297	106.75	0.494315	0.513538	0.210808	0.275654	0.505685	0.339408	0.0326339	0.298699	1.11839	tag healthy nuclei < 50 %
AHPN	Multiplex	EUB0000568a	C1C2CC3CC1CC(C2)(C3)C4=C(C=CC(=C4)C5=CC6=C(C=C5)C=C(C=C6)C(=O)O)O	Chemogenomic candidate	1	0	human fibroblast	1	0	191	0.0837696	0.91623	0.597015	0.32	0.297143	0.382857	0.402985	0.196429	0.25	0.0357143	125.417	0.662404	0.310276	0.328567	0.361157	0.337596	0.203306	0.230525	0.0840641	#DIV/0!	tag healthy nuclei < 50 %
AHPN	Multiplex	EUB0000568a	C1C2CC3CC1CC(C2)(C3)C4=C(C=CC(=C4)C5=CC6=C(C=C5)C=C(C=C6)C(=O)O)O	Chemogenomic candidate	10	12	HEK293T	2	1.05624	228	0.0570175	0.942982	0.145631	0.437209	0.0837209	0.47907	0.854369	0.117021	0.0638298	0.0319149	256.75	0.112092	0.454373	0.0637918	0.481836	0.887908	0.182057	0.132768	0.0724535	1.03765	tag healthy nuclei < 50 %
AHPN	Multiplex	EUB0000568a	C1C2CC3CC1CC(C2)(C3)C4=C(C=CC(=C4)C5=CC6=C(C=C5)C=C(C=C6)C(=O)O)O	Chemogenomic candidate	1	0	HEK293T	2	0	188	0.0425532	0.957447	0.0820896	0.2	0.0555556	0.744444	0.91791	0	0.277778	0.0277778	233.167	0.0929753	0.24237	0.0798532	0.677777	0.907025	0.0412417	0.171457	0.0110984	#DIV/0!	tag healthy nuclei < 50 %
AHPN	Multiplex	EUB0000568a	C1C2CC3CC1CC(C2)(C3)C4=C(C=CC(=C4)C5=CC6=C(C=C5)C=C(C=C6)C(=O)O)O	Chemogenomic candidate	1	48	human fibroblast	1	2.28422	267	0.430712	0.569288	0.789474	0.263158	0.611842	0.125	0.210526	0.05	0.15	0.025	110.667	0.531499	0.514801	0.276708	0.208491	0.468501	0.298464	0.0241518	0.276892	5.201	tag healthy nuclei < 50 %
AHPN	Multiplex	EUB0000568a	C1C2CC3CC1CC(C2)(C3)C4=C(C=CC(=C4)C5=CC6=C(C=C5)C=C(C=C6)C(=O)O)O	Chemogenomic candidate	10	48	HEK293T	1	0.173639	217	0.193548	0.806452	0.517647	0.302857	0.211429	0.485714	0.482353	0.169811	0.226415	0.0188679	351.333	0.392717	0.429172	0.195155	0.375673	0.607283	0.266274	0.27356	0.0493784	0.987254	tag healthy nuclei < 50 %
AHPN	Multiplex	EUB0000568a	C1C2CC3CC1CC(C2)(C3)C4=C(C=CC(=C4)C5=CC6=C(C=C5)C=C(C=C6)C(=O)O)O	Chemogenomic candidate	10	24	HEK293T	1	2.17783	218	0.201835	0.798165	0.528571	0.431034	0.166667	0.402299	0.471429	0.146667	0.346667	0.0133333	293.167	0.429543	0.395461	0.147538	0.457001	0.570457	0.312274	0.510446	0.0420248	1.14297	tag healthy nuclei < 50 %
AHPN	Multiplex	EUB0000568a	C1C2CC3CC1CC(C2)(C3)C4=C(C=CC(=C4)C5=CC6=C(C=C5)C=C(C=C6)C(=O)O)O	Chemogenomic candidate	10	48	HEK293T	2	0.1925	243	0.090535	0.909465	0.322034	0.339367	0.126697	0.533937	0.677966	0.106667	0.0266667	0.0133333	594.833	0.0998693	0.826482	0.0664568	0.107061	0.900131	0.232673	0.0431769	0.0808889	1.00265	tag healthy nuclei < 50 %
AHPN	Multiplex	EUB0000568a	C1C2CC3CC1CC(C2)(C3)C4=C(C=CC(=C4)C5=CC6=C(C=C5)C=C(C=C6)C(=O)O)O	Chemogenomic candidate	10	48	U2OS	1	0.233663	213	0.0938967	0.906103	0.72973	0.476684	0.331606	0.19171	0.27027	0.076087	0.347826	0	330	0.352767	0.881662	0.0538695	0.0644681	0.647233	0.102719	0.0952982	0.0225671	1.00252	tag healthy nuclei < 50 %
AHPN	Multiplex	EUB0000568a	C1C2CC3CC1CC(C2)(C3)C4=C(C=CC(=C4)C5=CC6=C(C=C5)C=C(C=C6)C(=O)O)O	Chemogenomic candidate	10	0	HEK293T	2	0	208	0.0625	0.9375	0.0352113	0.220513	0.0512821	0.728205	0.964789	0	0.162791	0	233.167	0.0929753	0.24237	0.0798532	0.677777	0.907025	0.0412417	0.171457	0.0110984	#DIV/0!	tag healthy nuclei < 50 %
AHPN	Multiplex	EUB0000568a	C1C2CC3CC1CC(C2)(C3)C4=C(C=CC(=C4)C5=CC6=C(C=C5)C=C(C=C6)C(=O)O)O	Chemogenomic candidate	10	0	human fibroblast	1	0	151	0.231788	0.768212	0.795455	0.232759	0.387931	0.37931	0.204545	0.222222	0.148148	0	125.417	0.662404	0.310276	0.328567	0.361157	0.337596	0.203306	0.230525	0.0840641	#DIV/0!	tag healthy nuclei < 50 %
AHPN	Multiplex	EUB0000568a	C1C2CC3CC1CC(C2)(C3)C4=C(C=CC(=C4)C5=CC6=C(C=C5)C=C(C=C6)C(=O)O)O	Chemogenomic candidate	10	24	human fibroblast	1	0.983142	113	0.212389	0.787611	0.576923	0.426966	0.280899	0.292135	0.423077	0.447368	0	0.552632	106.75	0.494315	0.513538	0.210808	0.275654	0.505685	0.339408	0.0326339	0.298699	1.11839	tag healthy nuclei < 50 %, tag membrane permeabilized > 50 %
AHPN	Multiplex	EUB0000568a	C1C2CC3CC1CC(C2)(C3)C4=C(C=CC(=C4)C5=CC6=C(C=C5)C=C(C=C6)C(=O)O)O	Chemogenomic candidate	10	12	HEK293T	1	1.90887	204	0.156863	0.843137	0.538462	0.331395	0.215116	0.453488	0.461538	0.140351	0.526316	0.0350877	274.667	0.427177	0.372026	0.131275	0.496699	0.572823	0.324854	0.687273	0.0469186	1.209	tag healthy nuclei < 50 %, tag mitochondrial mass > 50 %
AHPN	Multiplex	EUB0000568a	C1C2CC3CC1CC(C2)(C3)C4=C(C=CC(=C4)C5=CC6=C(C=C5)C=C(C=C6)C(=O)O)O	Chemogenomic candidate	1	0	HEK293T	1	0	304	0.0855263	0.914474	0.361111	0.280576	0.0719424	0.647482	0.638889	0	0.820513	0.025641	256.5	0.333294	0.212413	0.0958204	0.691766	0.666706	0.0141172	0.774309	0.00115741	#DIV/0!	tag healthy nuclei < 50 %, tag mitochondrial mass > 50 %
AHPN	Multiplex	EUB0000568a	C1C2CC3CC1CC(C2)(C3)C4=C(C=CC(=C4)C5=CC6=C(C=C5)C=C(C=C6)C(=O)O)O	Chemogenomic candidate	10	0	HEK293T	1	0	198	0.136364	0.863636	0.386555	0.140351	0.163743	0.695906	0.613445	0	0.958333	0	256.5	0.333294	0.212413	0.0958204	0.691766	0.666706	0.0141172	0.774309	0.00115741	#DIV/0!	tag healthy nuclei < 50 %, tag mitochondrial mass > 50 %
AHPN	Multiplex	EUB0000568a	C1C2CC3CC1CC(C2)(C3)C4=C(C=CC(=C4)C5=CC6=C(C=C5)C=C(C=C6)C(=O)O)O	Chemogenomic candidate	1	12	human fibroblast	1	-0.617094	249	0.180723	0.819277	0.573034	0.20098	0.362745	0.436275	0.426966	0.609756	0.219512	0.317073	107.083	0.631736	0.44459	0.220734	0.334676	0.368264	0.315502	0.0769574	0.274792	1.29875	tag healthy nuclei < 50 %, tag tubulin effect > 50 %
AHPN	Multiplex	EUB0000568a	C1C2CC3CC1CC(C2)(C3)C4=C(C=CC(=C4)C5=CC6=C(C=C5)C=C(C=C6)C(=O)O)O	Chemogenomic candidate	10	48	U2OS	2	-0.0283142	83	0.0963855	0.903614	0.909091	0.706667	0.146667	0.146667	0.0909091	0.45283	0.54717	0.207547	153.583	0.433939	0.864953	0.0805245	0.0545227	0.566061	0.197701	0.115167	0.0429551	1.00576	tag mitochondrial mass > 50 %
AHPN	Multiplex	EUB0000568a	C1C2CC3CC1CC(C2)(C3)C4=C(C=CC(=C4)C5=CC6=C(C=C5)C=C(C=C6)C(=O)O)O	Chemogenomic candidate	1	12	HEK293T	1	1.84601	320	0.05625	0.94375	0.356436	0.602649	0.0629139	0.334437	0.643564	0.302198	0.703297	0.010989	274.667	0.427177	0.372026	0.131275	0.496699	0.572823	0.324854	0.687273	0.0469186	1.209	tag mitochondrial mass > 50 %
AHPN	Multiplex	EUB0000568a	C1C2CC3CC1CC(C2)(C3)C4=C(C=CC(=C4)C5=CC6=C(C=C5)C=C(C=C6)C(=O)O)O	Chemogenomic candidate	10	48	human fibroblast	2	-0.314483	99	0.141414	0.858586	0.666667	0.588235	0.376471	0.0352941	0.333333	0.46	0.04	0.24	108	0.498611	0.755765	0.214424	0.0298114	0.501389	0.304063	0.0278827	0.153127	1.11404
AHPN	Multiplex	EUB0000568a	C1C2CC3CC1CC(C2)(C3)C4=C(C=CC(=C4)C5=CC6=C(C=C5)C=C(C=C6)C(=O)O)O	Chemogenomic candidate	1	0	U2OS	2	0	53	0.0754717	0.924528	0.5	0.897959	0.0612245	0.0408163	0.5	0.113636	0.204545	0.159091	70.3333	0.262184	0.811025	0.0807672	0.108207	0.737816	0.0985605	0.153729	0.0272522	0
AHPN	Multiplex	EUB0000568a	C1C2CC3CC1CC(C2)(C3)C4=C(C=CC(=C4)C5=CC6=C(C=C5)C=C(C=C6)C(=O)O)O	Chemogenomic candidate	1	12	U2OS	1	0.911288	98	0.112245	0.887755	0.5	0.666667	0.218391	0.114943	0.5	0.155172	0.12069	0.137931	165.75	0.37331	0.780206	0.114105	0.10569	0.62669	0.0951184	0.0845665	0.073208	1.05123
AHPN	Multiplex	EUB0000568a	C1C2CC3CC1CC(C2)(C3)C4=C(C=CC(=C4)C5=CC6=C(C=C5)C=C(C=C6)C(=O)O)O	Chemogenomic candidate	1	24	HEK293T	2	1.33961	257	0.0194553	0.980545	0.130435	0.75	0.0674603	0.18254	0.869565	0.269841	0.142857	0.132275	322.417	0.125402	0.652444	0.053119	0.294437	0.874598	0.274867	0.112063	0.0970907	1.01358
AHPN	Multiplex	EUB0000568a	C1C2CC3CC1CC(C2)(C3)C4=C(C=CC(=C4)C5=CC6=C(C=C5)C=C(C=C6)C(=O)O)O	Chemogenomic candidate	1	48	HEK293T	2	0.97258	390	0.0205128	0.979487	0.157895	0.806283	0.0942408	0.0994764	0.842105	0.198052	0.0194805	0.116883	594.833	0.0998693	0.826482	0.0664568	0.107061	0.900131	0.232673	0.0431769	0.0808889	1.00265
AHPN	Multiplex	EUB0000568a	C1C2CC3CC1CC(C2)(C3)C4=C(C=CC(=C4)C5=CC6=C(C=C5)C=C(C=C6)C(=O)O)O	Chemogenomic candidate	1	48	human fibroblast	2	0.0564254	87	0.149425	0.850575	0.714286	0.716216	0.189189	0.0945946	0.285714	0.283019	0.0188679	0.113208	108	0.498611	0.755765	0.214424	0.0298114	0.501389	0.304063	0.0278827	0.153127	1.11404
AHPN	Multiplex	EUB0000568a	C1C2CC3CC1CC(C2)(C3)C4=C(C=CC(=C4)C5=CC6=C(C=C5)C=C(C=C6)C(=O)O)O	Chemogenomic candidate	1	24	U2OS	1	0.493054	100	0.11	0.89	0.3	0.730337	0.157303	0.11236	0.7	0.107692	0.138462	0.107692	212.417	0.319581	0.825187	0.0885786	0.0862345	0.680419	0.098522	0.0722682	0.0503222	0.99162
AHPN	Multiplex	EUB0000568a	C1C2CC3CC1CC(C2)(C3)C4=C(C=CC(=C4)C5=CC6=C(C=C5)C=C(C=C6)C(=O)O)O	Chemogenomic candidate	1	48	U2OS	2	0.222293	73	0.0273973	0.972603	0.714286	0.802817	0.0985915	0.0985915	0.285714	0.210526	0.421053	0.105263	153.583	0.433939	0.864953	0.0805245	0.0545227	0.566061	0.197701	0.115167	0.0429551	1.00576
AHPN	Multiplex	EUB0000568a	C1C2CC3CC1CC(C2)(C3)C4=C(C=CC(=C4)C5=CC6=C(C=C5)C=C(C=C6)C(=O)O)O	Chemogenomic candidate	1	0	human fibroblast	2	0	102	0.117647	0.882353	0.545455	0.577778	0.3	0.122222	0.454545	0.230769	0.211538	0.0961538	101.167	0.681754	0.642258	0.240072	0.11767	0.318246	0.20189	0.247166	0.0567674	#DIV/0!
AHPN	Multiplex	EUB0000568a	C1C2CC3CC1CC(C2)(C3)C4=C(C=CC(=C4)C5=CC6=C(C=C5)C=C(C=C6)C(=O)O)O	Chemogenomic candidate	1	12	HEK293T	2	1.96358	214	0.0420561	0.957944	0.121951	0.570732	0.0292683	0.4	0.878049	0.179487	0.153846	0.0854701	256.75	0.112092	0.454373	0.0637918	0.481836	0.887908	0.182057	0.132768	0.0724535	1.03765
AHPN	Multiplex	EUB0000568a	C1C2CC3CC1CC(C2)(C3)C4=C(C=CC(=C4)C5=CC6=C(C=C5)C=C(C=C6)C(=O)O)O	Chemogenomic candidate	1	0	U2OS	1	0	94	0.159574	0.840426	0.1875	0.607595	0.189873	0.202532	0.8125	0.166667	0.333333	0.0833333	152.167	0.315784	0.706662	0.13121	0.162128	0.684216	0.118789	0.261243	0.0625529	0
AHPN	Multiplex	EUB0000568a	C1C2CC3CC1CC(C2)(C3)C4=C(C=CC(=C4)C5=CC6=C(C=C5)C=C(C=C6)C(=O)O)O	Chemogenomic candidate	10	24	U2OS	2	0.248567	83	0.0722892	0.927711	0	0.818182	0.142857	0.038961	1	0.285714	0.269841	0.0793651	102.167	0.521098	0.831195	0.0931875	0.0756178	0.478902	0.166245	0.0748286	0.0347485	1.01542
AHPN	Multiplex	EUB0000568a	C1C2CC3CC1CC(C2)(C3)C4=C(C=CC(=C4)C5=CC6=C(C=C5)C=C(C=C6)C(=O)O)O	Chemogenomic candidate	10	24	human fibroblast	2	0.248567	83	0.0722892	0.927711	0	0.818182	0.142857	0.038961	1	0.285714	0.269841	0.0793651	108.083	0.521098	0.831195	0.0931875	0.0756178	0.478902	0.166245	0.0748286	0.0347485	1.01542
AHPN	Multiplex	EUB0000568a	C1C2CC3CC1CC(C2)(C3)C4=C(C=CC(=C4)C5=CC6=C(C=C5)C=C(C=C6)C(=O)O)O	Chemogenomic candidate	1	48	U2OS	1	0.289302	117	0.0769231	0.923077	0.5	0.759259	0.166667	0.0740741	0.5	0.134146	0.317073	0.0731707	330	0.352767	0.881662	0.0538695	0.0644681	0.647233	0.102719	0.0952982	0.0225671	1.00252
AHPN	Multiplex	EUB0000568a	C1C2CC3CC1CC(C2)(C3)C4=C(C=CC(=C4)C5=CC6=C(C=C5)C=C(C=C6)C(=O)O)O	Chemogenomic candidate	10	0	human fibroblast	2	0	94	0.0425532	0.957447	0.571429	0.633333	0.211111	0.155556	0.428571	0.298246	0.350877	0.0701754	101.167	0.681754	0.642258	0.240072	0.11767	0.318246	0.20189	0.247166	0.0567674	#DIV/0!
AHPN	Multiplex	EUB0000568a	C1C2CC3CC1CC(C2)(C3)C4=C(C=CC(=C4)C5=CC6=C(C=C5)C=C(C=C6)C(=O)O)O	Chemogenomic candidate	1	24	HEK293T	1	2.31347	354	0.0508475	0.949153	0.375	0.755952	0.0535714	0.190476	0.625	0.240157	0.448819	0.0629921	293.167	0.429543	0.395461	0.147538	0.457001	0.570457	0.312274	0.510446	0.0420248	1.14297
AHPN	Multiplex	EUB0000568a	C1C2CC3CC1CC(C2)(C3)C4=C(C=CC(=C4)C5=CC6=C(C=C5)C=C(C=C6)C(=O)O)O	Chemogenomic candidate	1	12	U2OS	2	0.635631	62	0.0967742	0.903226	1	0.875	0.0892857	0.0357143	0	0.163265	0.163265	0.0612245	78.3333	0.502249	0.830741	0.0963907	0.0728682	0.497751	0.154861	0.0827165	0.0293447	1.11609
AHPN	Multiplex	EUB0000568a	C1C2CC3CC1CC(C2)(C3)C4=C(C=CC(=C4)C5=CC6=C(C=C5)C=C(C=C6)C(=O)O)O	Chemogenomic candidate	1	12	human fibroblast	2	0.635631	62	0.0967742	0.903226	1	0.875	0.0892857	0.0357143	0	0.163265	0.163265	0.0612245	106.333	0.502249	0.830741	0.0963907	0.0728682	0.497751	0.154861	0.0827165	0.0293447	1.11609
AHPN	Multiplex	EUB0000568a	C1C2CC3CC1CC(C2)(C3)C4=C(C=CC(=C4)C5=CC6=C(C=C5)C=C(C=C6)C(=O)O)O	Chemogenomic candidate	1	24	U2OS	2	0.232409	60	0.0666667	0.933333	1	0.892857	0.0714286	0.0357143	0	0.18	0.3	0.06	102.167	0.521098	0.831195	0.0931875	0.0756178	0.478902	0.166245	0.0748286	0.0347485	1.01542
AHPN	Multiplex	EUB0000568a	C1C2CC3CC1CC(C2)(C3)C4=C(C=CC(=C4)C5=CC6=C(C=C5)C=C(C=C6)C(=O)O)O	Chemogenomic candidate	1	24	human fibroblast	2	0.232409	60	0.0666667	0.933333	1	0.892857	0.0714286	0.0357143	0	0.18	0.3	0.06	108.083	0.521098	0.831195	0.0931875	0.0756178	0.478902	0.166245	0.0748286	0.0347485	1.01542
AHPN	Multiplex	EUB0000568a	C1C2CC3CC1CC(C2)(C3)C4=C(C=CC(=C4)C5=CC6=C(C=C5)C=C(C=C6)C(=O)O)O	Chemogenomic candidate	10	0	U2OS	1	0	192	0.0833333	0.916667	0.190476	0.789773	0.0909091	0.119318	0.809524	0.0863309	0.345324	0.0503597	152.167	0.315784	0.706662	0.13121	0.162128	0.684216	0.118789	0.261243	0.0625529	0
AHPN	Multiplex	EUB0000568a	C1C2CC3CC1CC(C2)(C3)C4=C(C=CC(=C4)C5=CC6=C(C=C5)C=C(C=C6)C(=O)O)O	Chemogenomic candidate	10	12	U2OS	1	0.724961	205	0.0682927	0.931707	0.666667	0.853403	0.0994764	0.0471204	0.333333	0.110429	0.153374	0.0490798	165.75	0.37331	0.780206	0.114105	0.10569	0.62669	0.0951184	0.0845665	0.073208	1.05123
AHPN	Multiplex	EUB0000568a	C1C2CC3CC1CC(C2)(C3)C4=C(C=CC(=C4)C5=CC6=C(C=C5)C=C(C=C6)C(=O)O)O	Chemogenomic candidate	10	24	HEK293T	2	0.572569	234	0.115385	0.884615	0.25	0.502415	0.111111	0.386473	0.75	0.163462	0.173077	0.0480769	322.417	0.125402	0.652444	0.053119	0.294437	0.874598	0.274867	0.112063	0.0970907	1.01358
AHPN	Multiplex	EUB0000568a	C1C2CC3CC1CC(C2)(C3)C4=C(C=CC(=C4)C5=CC6=C(C=C5)C=C(C=C6)C(=O)O)O	Chemogenomic candidate	10	24	U2OS	1	0.105932	206	0.0582524	0.941748	0.642857	0.773196	0.154639	0.0721649	0.357143	0.14	0.206667	0.04	212.417	0.319581	0.825187	0.0885786	0.0862345	0.680419	0.098522	0.0722682	0.0503222	0.99162
AHPN	Multiplex	EUB0000568a	C1C2CC3CC1CC(C2)(C3)C4=C(C=CC(=C4)C5=CC6=C(C=C5)C=C(C=C6)C(=O)O)O	Chemogenomic candidate	1	48	HEK293T	1	5.62115	565	0.0637168	0.936283	0.265306	0.803403	0.10397	0.0926276	0.734694	0.105882	0.134118	0.0211765	351.333	0.392717	0.429172	0.195155	0.375673	0.607283	0.266274	0.27356	0.0493784	0.987254
AHPN	Multiplex	EUB0000568a	C1C2CC3CC1CC(C2)(C3)C4=C(C=CC(=C4)C5=CC6=C(C=C5)C=C(C=C6)C(=O)O)O	Chemogenomic candidate	10	12	U2OS	2	2.21332	83	0.0240964	0.975904	1	0.876543	0.111111	0.0123457	0	0.253521	0.169014	0.0140845	78.3333	0.502249	0.830741	0.0963907	0.0728682	0.497751	0.154861	0.0827165	0.0293447	1.11609
AHPN	Multiplex	EUB0000568a	C1C2CC3CC1CC(C2)(C3)C4=C(C=CC(=C4)C5=CC6=C(C=C5)C=C(C=C6)C(=O)O)O	Chemogenomic candidate	10	12	human fibroblast	2	2.21332	83	0.0240964	0.975904	1	0.876543	0.111111	0.0123457	0	0.253521	0.169014	0.0140845	106.333	0.502249	0.830741	0.0963907	0.0728682	0.497751	0.154861	0.0827165	0.0293447	1.11609
AHPN	Multiplex	EUB0000568a	C1C2CC3CC1CC(C2)(C3)C4=C(C=CC(=C4)C5=CC6=C(C=C5)C=C(C=C6)C(=O)O)O	Chemogenomic candidate	10	0	U2OS	2	0	67	0.0298507	0.970149	0	0.846154	0.0615385	0.0923077	1	0.254545	0.0727273	0	70.3333	0.262184	0.811025	0.0807672	0.108207	0.737816	0.0985605	0.153729	0.0272522	0
AIM 100	Multiplex	EUB0000620a	C1(NC[C@H]2OCCC2)=C(C(C3=CC=CC=C3)=C(C4=CC=CC=C4)O5)C5=NC=N1	Chemogenomic candidate	1	12	human fibroblast	2	0	65	0.353846	0.646154	0.5	0.404762	0.357143	0.238095	0.5	0.470588	0.117647	0.294118	84.3333	0.520833	0.311795	0.58592	0.102285	0.479167	0.125354	0.149616	0.0949875	7.64557e+11	tag healthy nuclei < 50 %
AIM 100	Multiplex	EUB0000620a	C1(NC[C@H]2OCCC2)=C(C(C3=CC=CC=C3)=C(C4=CC=CC=C4)O5)C5=NC=N1	Chemogenomic candidate	1	12	human fibroblast	1	0.499728	123	0.113821	0.886179	0.772727	0.495413	0.302752	0.201835	0.227273	0.203704	0.0740741	0.222222	230.667	0.695283	0.596796	0.258529	0.144676	0.304717	0.0342007	0.0357415	0.0583164	1.23771	tag healthy nuclei < 50 %
AIM 100	Multiplex	EUB0000620a	C1(NC[C@H]2OCCC2)=C(C(C3=CC=CC=C3)=C(C4=CC=CC=C4)O5)C5=NC=N1	Chemogenomic candidate	1	0	human fibroblast	2	0	76	0.289474	0.710526	0.888889	0.314815	0.518519	0.166667	0.111111	0.176471	0.294118	0.117647	99.3333	0.557903	0.293865	0.595118	0.111016	0.442097	0.112114	0.290215	0.0427216	#DIV/0!	tag healthy nuclei < 50 %
AIM 100	Multiplex	EUB0000620a	C1(NC[C@H]2OCCC2)=C(C(C3=CC=CC=C3)=C(C4=CC=CC=C4)O5)C5=NC=N1	Chemogenomic candidate	1	0	human fibroblast	2	0	55	0.272727	0.727273	0.666667	0.25	0.6	0.15	0.333333	0.1	0	0.1	99.3333	0.557903	0.293865	0.595118	0.111016	0.442097	0.112114	0.290215	0.0427216	#DIV/0!	tag healthy nuclei < 50 %
AIM 100	Multiplex	EUB0000620a	C1(NC[C@H]2OCCC2)=C(C(C3=CC=CC=C3)=C(C4=CC=CC=C4)O5)C5=NC=N1	Chemogenomic candidate	1	0	human fibroblast	1	0	241	0.103734	0.896266	0.795918	0.476852	0.296296	0.226852	0.204082	0.0194175	0.106796	0.038835	211.75	0.805591	0.539397	0.278942	0.181661	0.194409	0.021052	0.100182	0.0283348	#DIV/0!	tag healthy nuclei < 50 %
AIM 100	Multiplex	EUB0000620a	C1(NC[C@H]2OCCC2)=C(C(C3=CC=CC=C3)=C(C4=CC=CC=C4)O5)C5=NC=N1	Chemogenomic candidate	1	0	HEK293T	1	0	1095	0.218919	0.781081	0.137056	0.425606	0.233564	0.34083	0.862944	0.0121951	0.191057	0.0162602	865.667	0.13691	0.491163	0.230041	0.278796	0.86309	0.0185405	0.129798	0.0320833	#DIV/0!	tag healthy nuclei < 50 %
AIM 100	Multiplex	EUB0000620a	C1(NC[C@H]2OCCC2)=C(C(C3=CC=CC=C3)=C(C4=CC=CC=C4)O5)C5=NC=N1	Chemogenomic candidate	10	0	HEK293T	2	0	234	0.017094	0.982906	0.0949367	0.213043	0.1	0.686957	0.905063	0.0612245	0.163265	0	233.167	0.0929753	0.24237	0.0798532	0.677777	0.907025	0.0412417	0.171457	0.0110984	#DIV/0!	tag healthy nuclei < 50 %
AIM 100	Multiplex	EUB0000620a	C1(NC[C@H]2OCCC2)=C(C(C3=CC=CC=C3)=C(C4=CC=CC=C4)O5)C5=NC=N1	Chemogenomic candidate	10	0	human fibroblast	1	0	254	0.417323	0.582677	0.863636	0.168919	0.682432	0.148649	0.136364	0.12	0.16	0	125.417	0.662404	0.310276	0.328567	0.361157	0.337596	0.203306	0.230525	0.0840641	#DIV/0!	tag healthy nuclei < 50 %
AIM 100	Multiplex	EUB0000620a	C1(NC[C@H]2OCCC2)=C(C(C3=CC=CC=C3)=C(C4=CC=CC=C4)O5)C5=NC=N1	Chemogenomic candidate	10	0	HEK293T	1	0	266	0.0977444	0.902256	0.47929	0.195833	0.1	0.704167	0.52071	0.0212766	0.765957	0	256.5	0.333294	0.212413	0.0958204	0.691766	0.666706	0.0141172	0.774309	0.00115741	#DIV/0!	tag healthy nuclei < 50 %, tag mitochondrial mass > 50 %
AIM 100	Multiplex	EUB0000620a	C1(NC[C@H]2OCCC2)=C(C(C3=CC=CC=C3)=C(C4=CC=CC=C4)O5)C5=NC=N1	Chemogenomic candidate	1	12	human fibroblast	2	-0.989169	52	0.442308	0.557692	0.25	0.37931	0.482759	0.137931	0.75	1	0.181818	0.272727	84.3333	0.520833	0.311795	0.58592	0.102285	0.479167	0.125354	0.149616	0.0949875	7.64557e+11	tag healthy nuclei < 50 %, tag tubulin effect > 50 %
AIM 100	Multiplex	EUB0000620a	C1(NC[C@H]2OCCC2)=C(C(C3=CC=CC=C3)=C(C4=CC=CC=C4)O5)C5=NC=N1	Chemogenomic candidate	10	12	human fibroblast	1	1.35096	99	0.20202	0.79798	0.533333	0.417722	0.202532	0.379747	0.466667	0.848485	0.424242	0.212121	107.083	0.631736	0.44459	0.220734	0.334676	0.368264	0.315502	0.0769574	0.274792	1.29875	tag healthy nuclei < 50 %, tag tubulin effect > 50 %
AIM 100	Multiplex	EUB0000620a	C1(NC[C@H]2OCCC2)=C(C(C3=CC=CC=C3)=C(C4=CC=CC=C4)O5)C5=NC=N1	Chemogenomic candidate	1	24	human fibroblast	2	-0.973614	66	0.333333	0.666667	0.7	0.340909	0.431818	0.227273	0.3	0.666667	0.0666667	0.133333	80.0833	0.552381	0.346171	0.555718	0.0981105	0.447619	0.11087	0.120814	0.103	231110	tag healthy nuclei < 50 %, tag tubulin effect > 50 %
AIM 100	Multiplex	EUB0000620a	C1(NC[C@H]2OCCC2)=C(C(C3=CC=CC=C3)=C(C4=CC=CC=C4)O5)C5=NC=N1	Chemogenomic candidate	1	24	human fibroblast	2	-0.999968	61	0.360656	0.639344	0.833333	0.179487	0.666667	0.153846	0.166667	1	0.571429	0.285714	80.0833	0.552381	0.346171	0.555718	0.0981105	0.447619	0.11087	0.120814	0.103	231110	tag healthy nuclei < 50 %, tag tubulin effect > 50 %, tag mitochondrial mass > 50 %
AIM 100	Multiplex	EUB0000620a	C1(NC[C@H]2OCCC2)=C(C(C3=CC=CC=C3)=C(C4=CC=CC=C4)O5)C5=NC=N1	Chemogenomic candidate	10	12	HEK293T	2	0.26067	218	0.0733945	0.926606	0.434109	0.311881	0.049505	0.638614	0.565891	0.904762	0.714286	0.174603	256.75	0.112092	0.454373	0.0637918	0.481836	0.887908	0.182057	0.132768	0.0724535	1.03765	tag healthy nuclei < 50 %, tag tubulin effect > 50 %, tag mitochondrial mass > 50 %
AIM 100	Multiplex	EUB0000620a	C1(NC[C@H]2OCCC2)=C(C(C3=CC=CC=C3)=C(C4=CC=CC=C4)O5)C5=NC=N1	Chemogenomic candidate	10	24	HEK293T	2	0.164935	222	0.045045	0.954955	0.435714	0.311321	0.0283019	0.660377	0.564286	0.909091	0.757576	0.166667	322.417	0.125402	0.652444	0.053119	0.294437	0.874598	0.274867	0.112063	0.0970907	1.01358	tag healthy nuclei < 50 %, tag tubulin effect > 50 %, tag mitochondrial mass > 50 %
AIM 100	Multiplex	EUB0000620a	C1(NC[C@H]2OCCC2)=C(C(C3=CC=CC=C3)=C(C4=CC=CC=C4)O5)C5=NC=N1	Chemogenomic candidate	10	24	human fibroblast	1	0.346292	99	0.252525	0.747475	0.769231	0.391892	0.432432	0.175676	0.230769	0.827586	0.517241	0.137931	106.75	0.494315	0.513538	0.210808	0.275654	0.505685	0.339408	0.0326339	0.298699	1.11839	tag healthy nuclei < 50 %, tag tubulin effect > 50 %, tag mitochondrial mass > 50 %
AIM 100	Multiplex	EUB0000620a	C1(NC[C@H]2OCCC2)=C(C(C3=CC=CC=C3)=C(C4=CC=CC=C4)O5)C5=NC=N1	Chemogenomic candidate	10	12	HEK293T	1	0.241443	263	0.178707	0.821293	0.72093	0.259259	0.143519	0.597222	0.27907	0.982143	0.982143	0.0357143	274.667	0.427177	0.372026	0.131275	0.496699	0.572823	0.324854	0.687273	0.0469186	1.209	tag healthy nuclei < 50 %, tag tubulin effect > 50 %, tag mitochondrial mass > 50 %
AIM 100	Multiplex	EUB0000620a	C1(NC[C@H]2OCCC2)=C(C(C3=CC=CC=C3)=C(C4=CC=CC=C4)O5)C5=NC=N1	Chemogenomic candidate	10	48	HEK293T	1	-0.261183	268	0.231343	0.768657	0.705882	0.160194	0.262136	0.57767	0.294118	0.939394	0.969697	0.030303	351.333	0.392717	0.429172	0.195155	0.375673	0.607283	0.266274	0.27356	0.0493784	0.987254	tag healthy nuclei < 50 %, tag tubulin effect > 50 %, tag mitochondrial mass > 50 %
AIM 100	Multiplex	EUB0000620a	C1(NC[C@H]2OCCC2)=C(C(C3=CC=CC=C3)=C(C4=CC=CC=C4)O5)C5=NC=N1	Chemogenomic candidate	10	24	HEK293T	1	-0.172488	260	0.230769	0.769231	0.694215	0.195	0.2	0.605	0.305785	0.948718	0.948718	0	293.167	0.429543	0.395461	0.147538	0.457001	0.570457	0.312274	0.510446	0.0420248	1.14297	tag healthy nuclei < 50 %, tag tubulin effect > 50 %, tag mitochondrial mass > 50 %
AIM 100	Multiplex	EUB0000620a	C1(NC[C@H]2OCCC2)=C(C(C3=CC=CC=C3)=C(C4=CC=CC=C4)O5)C5=NC=N1	Chemogenomic candidate	1	12	human fibroblast	1	-0.152012	267	0.131086	0.868914	0.686275	0.534483	0.24569	0.219828	0.313725	0.919355	0.169355	0.427419	230.667	0.695283	0.596796	0.258529	0.144676	0.304717	0.0342007	0.0357415	0.0583164	1.23771	tag tubulin effect > 50 %
AIM 100	Multiplex	EUB0000620a	C1(NC[C@H]2OCCC2)=C(C(C3=CC=CC=C3)=C(C4=CC=CC=C4)O5)C5=NC=N1	Chemogenomic candidate	1	12	HEK293T	1	-0.54139	692	0.117052	0.882948	0.201149	0.579378	0.135843	0.284779	0.798851	0.80226	0.138418	0.40678	691.5	0.185934	0.698273	0.149796	0.151931	0.814066	0.0267306	0.0412745	0.044192	1.10218	tag tubulin effect > 50 %
AIM 100	Multiplex	EUB0000620a	C1(NC[C@H]2OCCC2)=C(C(C3=CC=CC=C3)=C(C4=CC=CC=C4)O5)C5=NC=N1	Chemogenomic candidate	1	24	HEK293T	1	-0.120307	699	0.100143	0.899857	0.280822	0.653418	0.114467	0.232114	0.719178	0.914842	0.238443	0.386861	838.25	0.154355	0.792279	0.137252	0.0704688	0.845645	0.0333863	0.0308318	0.0797788	1.0151	tag tubulin effect > 50 %
AIM 100	Multiplex	EUB0000620a	C1(NC[C@H]2OCCC2)=C(C(C3=CC=CC=C3)=C(C4=CC=CC=C4)O5)C5=NC=N1	Chemogenomic candidate	1	12	HEK293T	2	-0.00840133	938	0.0287846	0.971215	0.138249	0.740944	0.0208562	0.2382	0.861751	0.961481	0.377778	0.311111	1765.83	0.0828653	0.866876	0.0909282	0.0421957	0.917135	0.0464362	0.0760075	0.0151675	0.999314	tag tubulin effect > 50 %
AIM 100	Multiplex	EUB0000620a	C1(NC[C@H]2OCCC2)=C(C(C3=CC=CC=C3)=C(C4=CC=CC=C4)O5)C5=NC=N1	Chemogenomic candidate	1	24	HEK293T	2	0.0599766	1013	0.0256663	0.974334	0.0865385	0.744681	0.0445795	0.21074	0.913462	0.980952	0.405442	0.27619	3025.33	0.160951	0.737455	0.183731	0.0788139	0.839049	0.452063	0.229554	0.0699568	0.474195	tag tubulin effect > 50 %
AIM 100	Multiplex	EUB0000620a	C1(NC[C@H]2OCCC2)=C(C(C3=CC=CC=C3)=C(C4=CC=CC=C4)O5)C5=NC=N1	Chemogenomic candidate	1	24	human fibroblast	1	-0.117822	254	0.181102	0.818898	0.659091	0.596154	0.192308	0.211538	0.340909	0.927419	0.41129	0.177419	242.833	0.651394	0.612787	0.255064	0.132149	0.348606	0.025027	0.0173706	0.0467803	1.19614	tag tubulin effect > 50 %
AIM 100	Multiplex	EUB0000620a	C1(NC[C@H]2OCCC2)=C(C(C3=CC=CC=C3)=C(C4=CC=CC=C4)O5)C5=NC=N1	Chemogenomic candidate	10	48	human fibroblast	2	1.14085	105	0.104762	0.895238	#DIV/0!	0.595745	0.404255	0	#DIV/0!	0.964286	0.428571	0.160714	108	0.498611	0.755765	0.214424	0.0298114	0.501389	0.304063	0.0278827	0.153127	1.11404	tag tubulin effect > 50 %
AIM 100	Multiplex	EUB0000620a	C1(NC[C@H]2OCCC2)=C(C(C3=CC=CC=C3)=C(C4=CC=CC=C4)O5)C5=NC=N1	Chemogenomic candidate	1	12	U2OS	1	0.160601	173	0.017341	0.982659	0.6875	0.864706	0.0411765	0.0941176	0.3125	0.918367	0.122449	0.727891	199.167	0.369403	0.889153	0.0559111	0.0549359	0.630597	0.260916	0.219385	0.107163	1.00798	tag tubulin effect > 50 %, tag membrane permeabilized > 50 %
AIM 100	Multiplex	EUB0000620a	C1(NC[C@H]2OCCC2)=C(C(C3=CC=CC=C3)=C(C4=CC=CC=C4)O5)C5=NC=N1	Chemogenomic candidate	1	24	U2OS	1	0.119649	198	0.0252525	0.974747	0.592593	0.797927	0.0621762	0.139896	0.407407	0.837662	0.266234	0.688312	276.667	0.370298	0.917275	0.0423433	0.0403816	0.629702	0.31212	0.21103	0.0682442	1.0014	tag tubulin effect > 50 %, tag membrane permeabilized > 50 %
AIM 100	Multiplex	EUB0000620a	C1(NC[C@H]2OCCC2)=C(C(C3=CC=CC=C3)=C(C4=CC=CC=C4)O5)C5=NC=N1	Chemogenomic candidate	1	12	U2OS	2	0.221442	137	0.109489	0.890511	0.666667	0.860656	0.0655738	0.0737705	0.333333	0.980952	0.171429	0.666667	139.167	0.248909	0.881032	0.0702926	0.0486752	0.751091	0.279715	0.240817	0.0972624	1.01342	tag tubulin effect > 50 %, tag membrane permeabilized > 50 %
AIM 100	Multiplex	EUB0000620a	C1(NC[C@H]2OCCC2)=C(C(C3=CC=CC=C3)=C(C4=CC=CC=C4)O5)C5=NC=N1	Chemogenomic candidate	10	48	U2OS	2	0.287035	80	0.1	0.9	0.777778	0.75	0.125	0.125	0.222222	0.722222	0.277778	0.62963	153.583	0.433939	0.864953	0.0805245	0.0545227	0.566061	0.197701	0.115167	0.0429551	1.00576	tag tubulin effect > 50 %, tag membrane permeabilized > 50 %
AIM 100	Multiplex	EUB0000620a	C1(NC[C@H]2OCCC2)=C(C(C3=CC=CC=C3)=C(C4=CC=CC=C4)O5)C5=NC=N1	Chemogenomic candidate	1	24	U2OS	2	0.188683	153	0.0653595	0.934641	0.92	0.776224	0.048951	0.174825	0.08	0.891892	0.198198	0.612613	178.5	0.310463	0.888541	0.0624047	0.049054	0.689537	0.288716	0.291394	0.0647451	1.00514	tag tubulin effect > 50 %, tag membrane permeabilized > 50 %
AIM 100	Multiplex	EUB0000620a	C1(NC[C@H]2OCCC2)=C(C(C3=CC=CC=C3)=C(C4=CC=CC=C4)O5)C5=NC=N1	Chemogenomic candidate	10	48	U2OS	1	0.291603	134	0.0597015	0.940299	0.705882	0.579365	0.150794	0.269841	0.294118	0.890411	0.616438	0.410959	330	0.352767	0.881662	0.0538695	0.0644681	0.647233	0.102719	0.0952982	0.0225671	1.00252	tag tubulin effect > 50 %, tag mitochondrial mass > 50 %
AIM 100	Multiplex	EUB0000620a	C1(NC[C@H]2OCCC2)=C(C(C3=CC=CC=C3)=C(C4=CC=CC=C4)O5)C5=NC=N1	Chemogenomic candidate	10	24	U2OS	1	0.0498733	138	0.123188	0.876812	0.821429	0.68595	0.0826446	0.231405	0.178571	0.951807	0.746988	0.349398	212.417	0.319581	0.825187	0.0885786	0.0862345	0.680419	0.098522	0.0722682	0.0503222	0.99162	tag tubulin effect > 50 %, tag mitochondrial mass > 50 %
AIM 100	Multiplex	EUB0000620a	C1(NC[C@H]2OCCC2)=C(C(C3=CC=CC=C3)=C(C4=CC=CC=C4)O5)C5=NC=N1	Chemogenomic candidate	10	12	U2OS	2	0.256865	61	0.0655738	0.934426	0.875	0.719298	0.140351	0.140351	0.125	0.95122	0.560976	0.341463	78.3333	0.502249	0.830741	0.0963907	0.0728682	0.497751	0.154861	0.0827165	0.0293447	1.11609	tag tubulin effect > 50 %, tag mitochondrial mass > 50 %
AIM 100	Multiplex	EUB0000620a	C1(NC[C@H]2OCCC2)=C(C(C3=CC=CC=C3)=C(C4=CC=CC=C4)O5)C5=NC=N1	Chemogenomic candidate	10	12	human fibroblast	2	0.256865	61	0.0655738	0.934426	0.875	0.719298	0.140351	0.140351	0.125	0.95122	0.560976	0.341463	106.333	0.502249	0.830741	0.0963907	0.0728682	0.497751	0.154861	0.0827165	0.0293447	1.11609	tag tubulin effect > 50 %, tag mitochondrial mass > 50 %
AIM 100	Multiplex	EUB0000620a	C1(NC[C@H]2OCCC2)=C(C(C3=CC=CC=C3)=C(C4=CC=CC=C4)O5)C5=NC=N1	Chemogenomic candidate	10	24	U2OS	2	-0.0824583	60	0.1	0.9	1	0.685185	0.148148	0.166667	0	0.810811	0.567568	0.216216	102.167	0.521098	0.831195	0.0931875	0.0756178	0.478902	0.166245	0.0748286	0.0347485	1.01542	tag tubulin effect > 50 %, tag mitochondrial mass > 50 %
AIM 100	Multiplex	EUB0000620a	C1(NC[C@H]2OCCC2)=C(C(C3=CC=CC=C3)=C(C4=CC=CC=C4)O5)C5=NC=N1	Chemogenomic candidate	10	24	human fibroblast	2	-0.0824583	60	0.1	0.9	1	0.685185	0.148148	0.166667	0	0.810811	0.567568	0.216216	108.083	0.521098	0.831195	0.0931875	0.0756178	0.478902	0.166245	0.0748286	0.0347485	1.01542	tag tubulin effect > 50 %, tag mitochondrial mass > 50 %
AIM 100	Multiplex	EUB0000620a	C1(NC[C@H]2OCCC2)=C(C(C3=CC=CC=C3)=C(C4=CC=CC=C4)O5)C5=NC=N1	Chemogenomic candidate	10	12	U2OS	1	-0.0421435	137	0.109489	0.890511	0.785714	0.647541	0.122951	0.229508	0.214286	0.936709	0.822785	0.202532	165.75	0.37331	0.780206	0.114105	0.10569	0.62669	0.0951184	0.0845665	0.073208	1.05123	tag tubulin effect > 50 %, tag mitochondrial mass > 50 %
AIM 100	Multiplex	EUB0000620a	C1(NC[C@H]2OCCC2)=C(C(C3=CC=CC=C3)=C(C4=CC=CC=C4)O5)C5=NC=N1	Chemogenomic candidate	10	48	HEK293T	2	0.468501	272	0.0588235	0.941176	0.4875	0.644531	0.0429688	0.3125	0.5125	0.909091	0.660606	0.193939	594.833	0.0998693	0.826482	0.0664568	0.107061	0.900131	0.232673	0.0431769	0.0808889	1.00265	tag tubulin effect > 50 %, tag mitochondrial mass > 50 %
AIM 100	Multiplex	EUB0000620a	C1(NC[C@H]2OCCC2)=C(C(C3=CC=CC=C3)=C(C4=CC=CC=C4)O5)C5=NC=N1	Chemogenomic candidate	10	48	human fibroblast	1	0	98	0.142857	0.857143	0.6	0.511905	0.369048	0.119048	0.4	0.953488	0.55814	0.139535	110.667	0.531499	0.514801	0.276708	0.208491	0.468501	0.298464	0.0241518	0.276892	5.201	tag tubulin effect > 50 %, tag mitochondrial mass > 50 %
AIM 100	Multiplex	EUB0000620a	C1(NC[C@H]2OCCC2)=C(C(C3=CC=CC=C3)=C(C4=CC=CC=C4)O5)C5=NC=N1	Chemogenomic candidate	1	12	U2OS	2	0.992325	107	0.186916	0.813084	0.25	0.908046	0.045977	0.045977	0.75	0.202532	0.35443	0.202532	139.167	0.248909	0.881032	0.0702926	0.0486752	0.751091	0.279715	0.240817	0.0972624	1.01342
AIM 100	Multiplex	EUB0000620a	C1(NC[C@H]2OCCC2)=C(C(C3=CC=CC=C3)=C(C4=CC=CC=C4)O5)C5=NC=N1	Chemogenomic candidate	10	0	U2OS	1	0	127	0.0472441	0.952756	0.269231	0.661157	0.123967	0.214876	0.730769	0.25	0.375	0.175	152.167	0.315784	0.706662	0.13121	0.162128	0.684216	0.118789	0.261243	0.0625529	0
AIM 100	Multiplex	EUB0000620a	C1(NC[C@H]2OCCC2)=C(C(C3=CC=CC=C3)=C(C4=CC=CC=C4)O5)C5=NC=N1	Chemogenomic candidate	1	24	human fibroblast	1	1.00305	121	0.123967	0.876033	0.785714	0.575472	0.292453	0.132075	0.214286	0.163934	0.0491803	0.163934	242.833	0.651394	0.612787	0.255064	0.132149	0.348606	0.025027	0.0173706	0.0467803	1.19614
AIM 100	Multiplex	EUB0000620a	C1(NC[C@H]2OCCC2)=C(C(C3=CC=CC=C3)=C(C4=CC=CC=C4)O5)C5=NC=N1	Chemogenomic candidate	1	24	U2OS	2	1.17139	143	0.0839161	0.916084	0.2	0.877863	0.0839695	0.0381679	0.8	0.243478	0.295652	0.13913	178.5	0.310463	0.888541	0.0624047	0.049054	0.689537	0.288716	0.291394	0.0647451	1.00514
AIM 100	Multiplex	EUB0000620a	C1(NC[C@H]2OCCC2)=C(C(C3=CC=CC=C3)=C(C4=CC=CC=C4)O5)C5=NC=N1	Chemogenomic candidate	1	0	U2OS	1	0	118	0.0762712	0.923729	0.5	0.862385	0.0642202	0.0733945	0.5	0.255319	0.0957447	0.117021	156.5	0.597808	0.882455	0.0611652	0.0563801	0.402192	0.271242	0.126392	0.10096	0
AIM 100	Multiplex	EUB0000620a	C1(NC[C@H]2OCCC2)=C(C(C3=CC=CC=C3)=C(C4=CC=CC=C4)O5)C5=NC=N1	Chemogenomic candidate	1	0	U2OS	2	0	111	0.108108	0.891892	0	0.939394	0.0505051	0.010101	1	0.139785	0.172043	0.107527	99.3333	#DIV/0!	0.877466	0.0854137	0.0371199	#DIV/0!	0.27287	0.183282	0.0858335	0
AIM 100	Multiplex	EUB0000620a	C1(NC[C@H]2OCCC2)=C(C(C3=CC=CC=C3)=C(C4=CC=CC=C4)O5)C5=NC=N1	Chemogenomic candidate	1	0	U2OS	1	0	154	0.00649351	0.993506	0.428571	0.908497	0.0457516	0.0457516	0.571429	0.302158	0.165468	0.100719	156.5	0.597808	0.882455	0.0611652	0.0563801	0.402192	0.271242	0.126392	0.10096	0
AIM 100	Multiplex	EUB0000620a	C1(NC[C@H]2OCCC2)=C(C(C3=CC=CC=C3)=C(C4=CC=CC=C4)O5)C5=NC=N1	Chemogenomic candidate	1	0	U2OS	2	0	84	0.285714	0.714286	0.333333	0.866667	0.0833333	0.05	0.666667	0.307692	0.134615	0.0961538	99.3333	#DIV/0!	0.877466	0.0854137	0.0371199	#DIV/0!	0.27287	0.183282	0.0858335	0
AIM 100	Multiplex	EUB0000620a	C1(NC[C@H]2OCCC2)=C(C(C3=CC=CC=C3)=C(C4=CC=CC=C4)O5)C5=NC=N1	Chemogenomic candidate	1	12	U2OS	1	1.04556	152	0.0460526	0.953947	0.5	0.848276	0.0689655	0.0827586	0.5	0.170732	0.186992	0.0894309	199.167	0.369403	0.889153	0.0559111	0.0549359	0.630597	0.260916	0.219385	0.107163	1.00798
AIM 100	Multiplex	EUB0000620a	C1(NC[C@H]2OCCC2)=C(C(C3=CC=CC=C3)=C(C4=CC=CC=C4)O5)C5=NC=N1	Chemogenomic candidate	1	24	HEK293T	1	1.14493	659	0.0576631	0.942337	0.212766	0.774557	0.149758	0.0756844	0.787234	0.0519751	0.033264	0.0893971	838.25	0.154355	0.792279	0.137252	0.0704688	0.845645	0.0333863	0.0308318	0.0797788	1.0151
AIM 100	Multiplex	EUB0000620a	C1(NC[C@H]2OCCC2)=C(C(C3=CC=CC=C3)=C(C4=CC=CC=C4)O5)C5=NC=N1	Chemogenomic candidate	1	24	U2OS	1	0.997056	202	0.0346535	0.965347	0.7	0.902564	0.0461538	0.0512821	0.3	0.244318	0.227273	0.0852273	276.667	0.370298	0.917275	0.0423433	0.0403816	0.629702	0.31212	0.21103	0.0682442	1.0014
AIM 100	Multiplex	EUB0000620a	C1(NC[C@H]2OCCC2)=C(C(C3=CC=CC=C3)=C(C4=CC=CC=C4)O5)C5=NC=N1	Chemogenomic candidate	10	0	U2OS	2	0	61	0.0655738	0.934426	0.333333	0.684211	0.157895	0.157895	0.666667	0.102564	0.0769231	0.0769231	70.3333	0.262184	0.811025	0.0807672	0.108207	0.737816	0.0985605	0.153729	0.0272522	0
AIM 100	Multiplex	EUB0000620a	C1(NC[C@H]2OCCC2)=C(C(C3=CC=CC=C3)=C(C4=CC=CC=C4)O5)C5=NC=N1	Chemogenomic candidate	1	24	HEK293T	2	0.75432	3002	0.0326449	0.967355	0.037037	0.65427	0.317837	0.0278926	0.962963	0.0957895	0.0173684	0.0684211	3025.33	0.160951	0.737455	0.183731	0.0788139	0.839049	0.452063	0.229554	0.0699568	0.474195
AIM 100	Multiplex	EUB0000620a	C1(NC[C@H]2OCCC2)=C(C(C3=CC=CC=C3)=C(C4=CC=CC=C4)O5)C5=NC=N1	Chemogenomic candidate	1	12	HEK293T	1	1.31173	563	0.133215	0.866785	0.209302	0.668033	0.155738	0.17623	0.790698	0.0368098	0.0460123	0.0368098	691.5	0.185934	0.698273	0.149796	0.151931	0.814066	0.0267306	0.0412745	0.044192	1.10218
AIM 100	Multiplex	EUB0000620a	C1(NC[C@H]2OCCC2)=C(C(C3=CC=CC=C3)=C(C4=CC=CC=C4)O5)C5=NC=N1	Chemogenomic candidate	1	0	human fibroblast	1	0	279	0.0824373	0.917563	0.673913	0.5625	0.257812	0.179688	0.326087	0.0208333	0.0763889	0.0277778	211.75	0.805591	0.539397	0.278942	0.181661	0.194409	0.021052	0.100182	0.0283348	#DIV/0!
AIM 100	Multiplex	EUB0000620a	C1(NC[C@H]2OCCC2)=C(C(C3=CC=CC=C3)=C(C4=CC=CC=C4)O5)C5=NC=N1	Chemogenomic candidate	1	12	HEK293T	2	0.80823	1825	0.0169863	0.983014	0.0246914	0.839465	0.115385	0.0451505	0.975309	0.0823373	0.0664011	0.0245684	1765.83	0.0828653	0.866876	0.0909282	0.0421957	0.917135	0.0464362	0.0760075	0.0151675	0.999314
AIM 100	Multiplex	EUB0000620a	C1(NC[C@H]2OCCC2)=C(C(C3=CC=CC=C3)=C(C4=CC=CC=C4)O5)C5=NC=N1	Chemogenomic candidate	1	0	HEK293T	1	0	893	0.179728	0.820272	0.145251	0.585987	0.185987	0.228025	0.854749	0.0282609	0.193478	0.0195652	865.667	0.13691	0.491163	0.230041	0.278796	0.86309	0.0185405	0.129798	0.0320833	#DIV/0!
AIM 100	Multiplex	EUB0000620a	C1(NC[C@H]2OCCC2)=C(C(C3=CC=CC=C3)=C(C4=CC=CC=C4)O5)C5=NC=N1	Chemogenomic candidate	1	0	HEK293T	2	0	925	0.0324324	0.967568	0.125749	0.759777	0.0536313	0.186592	0.874251	0.00441176	0.292647	0.00294118	1080.25	0.142406	0.776982	0.0533037	0.169714	0.857594	0.00453037	0.323128	0.00113292	#DIV/0!
AIM 100	Multiplex	EUB0000620a	C1(NC[C@H]2OCCC2)=C(C(C3=CC=CC=C3)=C(C4=CC=CC=C4)O5)C5=NC=N1	Chemogenomic candidate	10	0	human fibroblast	2	0	81	0.111111	0.888889	0.75	0.597222	0.236111	0.166667	0.25	0.325581	0.348837	0	101.167	0.681754	0.642258	0.240072	0.11767	0.318246	0.20189	0.247166	0.0567674	#DIV/0!
AIM 100	Multiplex	EUB0000620a	C1(NC[C@H]2OCCC2)=C(C(C3=CC=CC=C3)=C(C4=CC=CC=C4)O5)C5=NC=N1	Chemogenomic candidate	1	0	HEK293T	2	0	1159	0.0207075	0.979292	0.163158	0.790308	0.0422907	0.167401	0.836842	0.00557414	0.275362	0	1080.25	0.142406	0.776982	0.0533037	0.169714	0.857594	0.00453037	0.323128	0.00113292	#DIV/0!
AKT inhibitor VIII	Multiplex	EUB0000653a	C1CN(CCC1N2C3=CC=CC=C3NC2=O)CC4=CC=C(C=C4)C5=C(N=C6C=C7C(=NC=N7)C=C6N5)C8=CC=CC=C8	Chemogenomic candidate	1	12	human fibroblast	2	891.825	99	0.313131	0.686869	0.833333	0.191176	0.720588	0.0882353	0.166667	0.230769	0	0.153846	84.3333	0.520833	0.311795	0.58592	0.102285	0.479167	0.125354	0.149616	0.0949875	7.64557e+11	tag healthy nuclei < 50 %
AKT inhibitor VIII	Multiplex	EUB0000653a	C1CN(CCC1N2C3=CC=CC=C3NC2=O)CC4=CC=C(C=C4)C5=C(N=C6C=C7C(=NC=N7)C=C6N5)C8=CC=CC=C8	Chemogenomic candidate	1	24	human fibroblast	1	1.01061	268	0.208955	0.791045	0.454545	0.40566	0.438679	0.15566	0.545455	0.162791	0.0581395	0.0813953	242.833	0.651394	0.612787	0.255064	0.132149	0.348606	0.025027	0.0173706	0.0467803	1.19614	tag healthy nuclei < 50 %
AKT inhibitor VIII	Multiplex	EUB0000653a	C1CN(CCC1N2C3=CC=CC=C3NC2=O)CC4=CC=C(C=C4)C5=C(N=C6C=C7C(=NC=N7)C=C6N5)C8=CC=CC=C8	Chemogenomic candidate	1	12	human fibroblast	1	2.02916	251	0.171315	0.828685	0.666667	0.432692	0.451923	0.115385	0.333333	0.188889	0.0333333	0.0666667	230.667	0.695283	0.596796	0.258529	0.144676	0.304717	0.0342007	0.0357415	0.0583164	1.23771	tag healthy nuclei < 50 %
AKT inhibitor VIII	Multiplex	EUB0000653a	C1CN(CCC1N2C3=CC=CC=C3NC2=O)CC4=CC=C(C=C4)C5=C(N=C6C=C7C(=NC=N7)C=C6N5)C8=CC=CC=C8	Chemogenomic candidate	10	0	human fibroblast	2	0	77	0.324675	0.675325	0.5	0.442308	0.519231	0.0384615	0.5	0.0869565	0.26087	0.0434783	99.3333	0.557903	0.293865	0.595118	0.111016	0.442097	0.112114	0.290215	0.0427216	#DIV/0!	tag healthy nuclei < 50 %
AKT inhibitor VIII	Multiplex	EUB0000653a	C1CN(CCC1N2C3=CC=CC=C3NC2=O)CC4=CC=C(C=C4)C5=C(N=C6C=C7C(=NC=N7)C=C6N5)C8=CC=CC=C8	Chemogenomic candidate	1	0	HEK293T	1	0	957	0.163243	0.836757	0.131579	0.47416	0.280362	0.245478	0.868421	0.00544959	0.0844687	0.0326975	865.667	0.13691	0.491163	0.230041	0.278796	0.86309	0.0185405	0.129798	0.0320833	#DIV/0!	tag healthy nuclei < 50 %
AKT inhibitor VIII	Multiplex	EUB0000653a	C1CN(CCC1N2C3=CC=CC=C3NC2=O)CC4=CC=C(C=C4)C5=C(N=C6C=C7C(=NC=N7)C=C6N5)C8=CC=CC=C8	Chemogenomic candidate	1	24	human fibroblast	2	-0.999877	94	0.319149	0.680851	0.625	0.171875	0.703125	0.125	0.375	0.363636	0.272727	0	80.0833	0.552381	0.346171	0.555718	0.0981105	0.447619	0.11087	0.120814	0.103	231110	tag healthy nuclei < 50 %
AKT inhibitor VIII	Multiplex	EUB0000653a	C1CN(CCC1N2C3=CC=CC=C3NC2=O)CC4=CC=C(C=C4)C5=C(N=C6C=C7C(=NC=N7)C=C6N5)C8=CC=CC=C8	Chemogenomic candidate	1	0	human fibroblast	2	0	103	0.436893	0.563107	1	0.258621	0.637931	0.103448	0	0	0.0666667	0	99.3333	0.557903	0.293865	0.595118	0.111016	0.442097	0.112114	0.290215	0.0427216	#DIV/0!	tag healthy nuclei < 50 %
AKT inhibitor VIII	Multiplex	EUB0000653a	C1CN(CCC1N2C3=CC=CC=C3NC2=O)CC4=CC=C(C=C4)C5=C(N=C6C=C7C(=NC=N7)C=C6N5)C8=CC=CC=C8	Chemogenomic candidate	10	12	human fibroblast	2	-1	158	0.487342	0.512658	0.7	0.407407	0.469136	0.123457	0.3	0.727273	0.121212	0.272727	84.3333	0.520833	0.311795	0.58592	0.102285	0.479167	0.125354	0.149616	0.0949875	7.64557e+11	tag healthy nuclei < 50 %, tag tubulin effect > 50 %
AKT inhibitor VIII	Multiplex	EUB0000653a	C1CN(CCC1N2C3=CC=CC=C3NC2=O)CC4=CC=C(C=C4)C5=C(N=C6C=C7C(=NC=N7)C=C6N5)C8=CC=CC=C8	Chemogenomic candidate	10	24	U2OS	2	-0.2778	130	0.146154	0.853846	0.805556	0.387387	0.288288	0.324324	0.194444	1	0.883721	0.72093	178.5	0.310463	0.888541	0.0624047	0.049054	0.689537	0.288716	0.291394	0.0647451	1.00514	tag healthy nuclei < 50 %, tag tubulin effect > 50 %, tag mitochondrial mass > 50 %, tag membrane permeabilized > 50 %
AKT inhibitor VIII	Multiplex	EUB0000653a	C1CN(CCC1N2C3=CC=CC=C3NC2=O)CC4=CC=C(C=C4)C5=C(N=C6C=C7C(=NC=N7)C=C6N5)C8=CC=CC=C8	Chemogenomic candidate	10	24	human fibroblast	2	10.263	143	0.517483	0.482517	0.5625	0.362319	0.405797	0.231884	0.4375	0.4	0.28	0.24	80.0833	0.552381	0.346171	0.555718	0.0981105	0.447619	0.11087	0.120814	0.103	231110	tag Hoechst High Intensity, tag healthy nuclei < 50 %
AKT inhibitor VIII	Multiplex	EUB0000653a	C1CN(CCC1N2C3=CC=CC=C3NC2=O)CC4=CC=C(C=C4)C5=C(N=C6C=C7C(=NC=N7)C=C6N5)C8=CC=CC=C8	Chemogenomic candidate	10	24	human fibroblast	1	-0.610879	437	0.622426	0.377574	0.705882	0.454545	0.442424	0.10303	0.294118	0.653333	0.146667	0.2	242.833	0.651394	0.612787	0.255064	0.132149	0.348606	0.025027	0.0173706	0.0467803	1.19614	tag Hoechst High Intensity, tag healthy nuclei < 50 %, tag healthy nuclei < 50 %, tag tubulin effect > 50 %
AKT inhibitor VIII	Multiplex	EUB0000653a	C1CN(CCC1N2C3=CC=CC=C3NC2=O)CC4=CC=C(C=C4)C5=C(N=C6C=C7C(=NC=N7)C=C6N5)C8=CC=CC=C8	Chemogenomic candidate	10	12	human fibroblast	1	-0.488603	524	0.55916	0.44084	0.678571	0.372294	0.506494	0.121212	0.321429	0.872093	0.0465116	0.337209	230.667	0.695283	0.596796	0.258529	0.144676	0.304717	0.0342007	0.0357415	0.0583164	1.23771	tag Hoechst High Intensity, tag healthy nuclei < 50 %, tag tubulin effect > 50 %
AKT inhibitor VIII	Multiplex	EUB0000653a	C1CN(CCC1N2C3=CC=CC=C3NC2=O)CC4=CC=C(C=C4)C5=C(N=C6C=C7C(=NC=N7)C=C6N5)C8=CC=CC=C8	Chemogenomic candidate	10	12	HEK293T	1	-0.861494	661	0.207262	0.792738	0.389423	0.501908	0.101145	0.396947	0.610577	0.91635	0.406844	0.228137	691.5	0.185934	0.698273	0.149796	0.151931	0.814066	0.0267306	0.0412745	0.044192	1.10218	tag tubulin effect > 50 %
AKT inhibitor VIII	Multiplex	EUB0000653a	C1CN(CCC1N2C3=CC=CC=C3NC2=O)CC4=CC=C(C=C4)C5=C(N=C6C=C7C(=NC=N7)C=C6N5)C8=CC=CC=C8	Chemogenomic candidate	1	24	HEK293T	2	0.804265	2517	0.0401271	0.959873	0.076087	0.790977	0.170944	0.0380795	0.923913	0.529042	0.0648875	0.14652	3025.33	0.160951	0.737455	0.183731	0.0788139	0.839049	0.452063	0.229554	0.0699568	0.474195	tag tubulin effect > 50 %
AKT inhibitor VIII	Multiplex	EUB0000653a	C1CN(CCC1N2C3=CC=CC=C3NC2=O)CC4=CC=C(C=C4)C5=C(N=C6C=C7C(=NC=N7)C=C6N5)C8=CC=CC=C8	Chemogenomic candidate	10	12	U2OS	1	-0.0235882	173	0.0404624	0.959538	0.304348	0.668675	0.192771	0.138554	0.695652	1	0.612613	0.297297	199.167	0.369403	0.889153	0.0559111	0.0549359	0.630597	0.260916	0.219385	0.107163	1.00798	tag tubulin effect > 50 %, tag mitochondrial mass > 50 %
AKT inhibitor VIII	Multiplex	EUB0000653a	C1CN(CCC1N2C3=CC=CC=C3NC2=O)CC4=CC=C(C=C4)C5=C(N=C6C=C7C(=NC=N7)C=C6N5)C8=CC=CC=C8	Chemogenomic candidate	10	12	HEK293T	2	-0.204719	974	0.137577	0.862423	0.240566	0.719048	0.0285714	0.252381	0.759434	0.869205	0.514901	0.134106	1765.83	0.0828653	0.866876	0.0909282	0.0421957	0.917135	0.0464362	0.0760075	0.0151675	0.999314	tag tubulin effect > 50 %, tag mitochondrial mass > 50 %
AKT inhibitor VIII	Multiplex	EUB0000653a	C1CN(CCC1N2C3=CC=CC=C3NC2=O)CC4=CC=C(C=C4)C5=C(N=C6C=C7C(=NC=N7)C=C6N5)C8=CC=CC=C8	Chemogenomic candidate	10	24	HEK293T	1	-0.580875	612	0.312092	0.687908	0.549618	0.565321	0.123515	0.311164	0.450382	0.831933	0.701681	0.0966387	838.25	0.154355	0.792279	0.137252	0.0704688	0.845645	0.0333863	0.0308318	0.0797788	1.0151	tag tubulin effect > 50 %, tag mitochondrial mass > 50 %
AKT inhibitor VIII	Multiplex	EUB0000653a	C1CN(CCC1N2C3=CC=CC=C3NC2=O)CC4=CC=C(C=C4)C5=C(N=C6C=C7C(=NC=N7)C=C6N5)C8=CC=CC=C8	Chemogenomic candidate	10	24	HEK293T	2	-0.269758	883	0.232163	0.767837	0.280899	0.715339	0.0221239	0.262537	0.719101	0.723711	0.672165	0.0618557	3025.33	0.160951	0.737455	0.183731	0.0788139	0.839049	0.452063	0.229554	0.0699568	0.474195	tag tubulin effect > 50 %, tag mitochondrial mass > 50 %
AKT inhibitor VIII	Multiplex	EUB0000653a	C1CN(CCC1N2C3=CC=CC=C3NC2=O)CC4=CC=C(C=C4)C5=C(N=C6C=C7C(=NC=N7)C=C6N5)C8=CC=CC=C8	Chemogenomic candidate	10	12	U2OS	2	0.229121	142	0.0704225	0.929577	0.461538	0.515152	0.386364	0.0984848	0.538462	1	0.75	0.544118	139.167	0.248909	0.881032	0.0702926	0.0486752	0.751091	0.279715	0.240817	0.0972624	1.01342	tag tubulin effect > 50 %, tag mitochondrial mass > 50 %, tag membrane permeabilized > 50 %
AKT inhibitor VIII	Multiplex	EUB0000653a	C1CN(CCC1N2C3=CC=CC=C3NC2=O)CC4=CC=C(C=C4)C5=C(N=C6C=C7C(=NC=N7)C=C6N5)C8=CC=CC=C8	Chemogenomic candidate	10	24	U2OS	1	-0.290954	174	0.0632184	0.936782	0.55102	0.503067	0.196319	0.300613	0.44898	1	0.914634	0.536585	276.667	0.370298	0.917275	0.0423433	0.0403816	0.629702	0.31212	0.21103	0.0682442	1.0014	tag tubulin effect > 50 %, tag mitochondrial mass > 50 %, tag membrane permeabilized > 50 %
AKT inhibitor VIII	Multiplex	EUB0000653a	C1CN(CCC1N2C3=CC=CC=C3NC2=O)CC4=CC=C(C=C4)C5=C(N=C6C=C7C(=NC=N7)C=C6N5)C8=CC=CC=C8	Chemogenomic candidate	1	12	U2OS	1	0.502267	162	0.0555556	0.944444	0.444444	0.875817	0.0653595	0.0588235	0.555556	0.246269	0.11194	0.373134	199.167	0.369403	0.889153	0.0559111	0.0549359	0.630597	0.260916	0.219385	0.107163	1.00798
AKT inhibitor VIII	Multiplex	EUB0000653a	C1CN(CCC1N2C3=CC=CC=C3NC2=O)CC4=CC=C(C=C4)C5=C(N=C6C=C7C(=NC=N7)C=C6N5)C8=CC=CC=C8	Chemogenomic candidate	1	24	U2OS	1	0.498995	211	0.0521327	0.947867	0.421053	0.83	0.075	0.095	0.578947	0.162651	0.126506	0.319277	276.667	0.370298	0.917275	0.0423433	0.0403816	0.629702	0.31212	0.21103	0.0682442	1.0014
AKT inhibitor VIII	Multiplex	EUB0000653a	C1CN(CCC1N2C3=CC=CC=C3NC2=O)CC4=CC=C(C=C4)C5=C(N=C6C=C7C(=NC=N7)C=C6N5)C8=CC=CC=C8	Chemogenomic candidate	1	12	U2OS	2	0.402594	124	0.0806452	0.919355	0.375	0.850877	0.0789474	0.0701754	0.625	0.237113	0.164948	0.257732	139.167	0.248909	0.881032	0.0702926	0.0486752	0.751091	0.279715	0.240817	0.0972624	1.01342
AKT inhibitor VIII	Multiplex	EUB0000653a	C1CN(CCC1N2C3=CC=CC=C3NC2=O)CC4=CC=C(C=C4)C5=C(N=C6C=C7C(=NC=N7)C=C6N5)C8=CC=CC=C8	Chemogenomic candidate	1	24	HEK293T	1	0.666949	776	0.068299	0.931701	0.116279	0.795297	0.145228	0.0594744	0.883721	0.147826	0.0347826	0.173913	838.25	0.154355	0.792279	0.137252	0.0704688	0.845645	0.0333863	0.0308318	0.0797788	1.0151
AKT inhibitor VIII	Multiplex	EUB0000653a	C1CN(CCC1N2C3=CC=CC=C3NC2=O)CC4=CC=C(C=C4)C5=C(N=C6C=C7C(=NC=N7)C=C6N5)C8=CC=CC=C8	Chemogenomic candidate	1	24	U2OS	2	0.553369	157	0.0318471	0.968153	0.411765	0.815789	0.0723684	0.111842	0.588235	0.16129	0.153226	0.145161	178.5	0.310463	0.888541	0.0624047	0.049054	0.689537	0.288716	0.291394	0.0647451	1.00514
AKT inhibitor VIII	Multiplex	EUB0000653a	C1CN(CCC1N2C3=CC=CC=C3NC2=O)CC4=CC=C(C=C4)C5=C(N=C6C=C7C(=NC=N7)C=C6N5)C8=CC=CC=C8	Chemogenomic candidate	1	0	U2OS	1	0	141	0.0283688	0.971631	0.666667	0.839416	0.0948905	0.0656934	0.333333	0.234783	0.121739	0.104348	156.5	0.597808	0.882455	0.0611652	0.0563801	0.402192	0.271242	0.126392	0.10096	0
AKT inhibitor VIII	Multiplex	EUB0000653a	C1CN(CCC1N2C3=CC=CC=C3NC2=O)CC4=CC=C(C=C4)C5=C(N=C6C=C7C(=NC=N7)C=C6N5)C8=CC=CC=C8	Chemogenomic candidate	10	0	U2OS	1	0	127	0.0551181	0.944882	0.375	0.933333	0	0.0666667	0.625	0.1875	0.133929	0.0892857	156.5	0.597808	0.882455	0.0611652	0.0563801	0.402192	0.271242	0.126392	0.10096	0
AKT inhibitor VIII	Multiplex	EUB0000653a	C1CN(CCC1N2C3=CC=CC=C3NC2=O)CC4=CC=C(C=C4)C5=C(N=C6C=C7C(=NC=N7)C=C6N5)C8=CC=CC=C8	Chemogenomic candidate	1	12	HEK293T	1	0.452067	646	0.0773994	0.922601	0.163265	0.697987	0.137584	0.16443	0.836735	0.0600962	0.0384615	0.0745192	691.5	0.185934	0.698273	0.149796	0.151931	0.814066	0.0267306	0.0412745	0.044192	1.10218
AKT inhibitor VIII	Multiplex	EUB0000653a	C1CN(CCC1N2C3=CC=CC=C3NC2=O)CC4=CC=C(C=C4)C5=C(N=C6C=C7C(=NC=N7)C=C6N5)C8=CC=CC=C8	Chemogenomic candidate	1	12	HEK293T	2	0.740398	1621	0.0234423	0.976558	0.1	0.891346	0.0518004	0.0568541	0.9	0.430191	0.238838	0.0581148	1765.83	0.0828653	0.866876	0.0909282	0.0421957	0.917135	0.0464362	0.0760075	0.0151675	0.999314
AKT inhibitor VIII	Multiplex	EUB0000653a	C1CN(CCC1N2C3=CC=CC=C3NC2=O)CC4=CC=C(C=C4)C5=C(N=C6C=C7C(=NC=N7)C=C6N5)C8=CC=CC=C8	Chemogenomic candidate	10	0	U2OS	2	0	76	0.144737	0.855263	1	0.923077	0.0615385	0.0153846	0	0.3	0.333333	0.05	99.3333	#DIV/0!	0.877466	0.0854137	0.0371199	#DIV/0!	0.27287	0.183282	0.0858335	0
AKT inhibitor VIII	Multiplex	EUB0000653a	C1CN(CCC1N2C3=CC=CC=C3NC2=O)CC4=CC=C(C=C4)C5=C(N=C6C=C7C(=NC=N7)C=C6N5)C8=CC=CC=C8	Chemogenomic candidate	1	0	human fibroblast	1	0	226	0.168142	0.831858	0.777778	0.521277	0.335106	0.143617	0.222222	0.0204082	0.0612245	0.0408163	211.75	0.805591	0.539397	0.278942	0.181661	0.194409	0.021052	0.100182	0.0283348	#DIV/0!
AKT inhibitor VIII	Multiplex	EUB0000653a	C1CN(CCC1N2C3=CC=CC=C3NC2=O)CC4=CC=C(C=C4)C5=C(N=C6C=C7C(=NC=N7)C=C6N5)C8=CC=CC=C8	Chemogenomic candidate	1	0	U2OS	2	0	108	0.185185	0.814815	0	0.897727	0.0795455	0.0227273	1	0.329114	0.164557	0.0253165	99.3333	#DIV/0!	0.877466	0.0854137	0.0371199	#DIV/0!	0.27287	0.183282	0.0858335	0
AKT inhibitor VIII	Multiplex	EUB0000653a	C1CN(CCC1N2C3=CC=CC=C3NC2=O)CC4=CC=C(C=C4)C5=C(N=C6C=C7C(=NC=N7)C=C6N5)C8=CC=CC=C8	Chemogenomic candidate	10	0	human fibroblast	1	0	217	0.0875576	0.912442	0.913043	0.520202	0.247475	0.232323	0.0869565	0.038835	0.0582524	0.0194175	211.75	0.805591	0.539397	0.278942	0.181661	0.194409	0.021052	0.100182	0.0283348	#DIV/0!
AKT inhibitor VIII	Multiplex	EUB0000653a	C1CN(CCC1N2C3=CC=CC=C3NC2=O)CC4=CC=C(C=C4)C5=C(N=C6C=C7C(=NC=N7)C=C6N5)C8=CC=CC=C8	Chemogenomic candidate	10	0	HEK293T	1	0	1081	0.148914	0.851086	0.134615	0.620899	0.126367	0.252734	0.865385	0.0156556	0.135029	0.00978474	865.667	0.13691	0.491163	0.230041	0.278796	0.86309	0.0185405	0.129798	0.0320833	#DIV/0!
AKT inhibitor VIII	Multiplex	EUB0000653a	C1CN(CCC1N2C3=CC=CC=C3NC2=O)CC4=CC=C(C=C4)C5=C(N=C6C=C7C(=NC=N7)C=C6N5)C8=CC=CC=C8	Chemogenomic candidate	10	0	HEK293T	2	0	1006	0.027833	0.972167	0.202073	0.754601	0.0480573	0.197342	0.797927	0.0108401	0.252033	0.00406504	1080.25	0.142406	0.776982	0.0533037	0.169714	0.857594	0.00453037	0.323128	0.00113292	#DIV/0!
AKT inhibitor VIII	Multiplex	EUB0000653a	C1CN(CCC1N2C3=CC=CC=C3NC2=O)CC4=CC=C(C=C4)C5=C(N=C6C=C7C(=NC=N7)C=C6N5)C8=CC=CC=C8	Chemogenomic candidate	1	0	HEK293T	2	0	1162	0.024957	0.975043	0.176166	0.76699	0.0626655	0.170344	0.823834	0.00690449	0.317606	0.0023015	1080.25	0.142406	0.776982	0.0533037	0.169714	0.857594	0.00453037	0.323128	0.00113292	#DIV/0!
ALK-IN-1	Multiplex	EUB0000635a	CN(C)C1CCN(CC1)C2=CC(=C(C=C2)NC3=NC=C(C(=N3)NC4=CC=CC=C4P(=O)(C)C)Cl)OC	Chemogenomic candidate	1	0	human fibroblast	2	0	68	0.308824	0.691176	0.6	0.297872	0.489362	0.212766	0.4	0.142857	0.285714	0.142857	99.3333	0.557903	0.293865	0.595118	0.111016	0.442097	0.112114	0.290215	0.0427216	#DIV/0!	tag healthy nuclei < 50 %
ALK-IN-1	Multiplex	EUB0000635a	CN(C)C1CCN(CC1)C2=CC(=C(C=C2)NC3=NC=C(C(=N3)NC4=CC=CC=C4P(=O)(C)C)Cl)OC	Chemogenomic candidate	1	12	human fibroblast	2	0	58	0.241379	0.758621	0.428571	0.318182	0.522727	0.159091	0.571429	0.214286	0.0714286	0.142857	84.3333	0.520833	0.311795	0.58592	0.102285	0.479167	0.125354	0.149616	0.0949875	7.64557e+11	tag healthy nuclei < 50 %
ALK-IN-1	Multiplex	EUB0000635a	CN(C)C1CCN(CC1)C2=CC(=C(C=C2)NC3=NC=C(C(=N3)NC4=CC=CC=C4P(=O)(C)C)Cl)OC	Chemogenomic candidate	10	12	human fibroblast	2	1.52107e+07	61	0.393443	0.606557	0.375	0.324324	0.459459	0.216216	0.625	0.416667	0.166667	0.0833333	84.3333	0.520833	0.311795	0.58592	0.102285	0.479167	0.125354	0.149616	0.0949875	7.64557e+11	tag healthy nuclei < 50 %
ALK-IN-1	Multiplex	EUB0000635a	CN(C)C1CCN(CC1)C2=CC(=C(C=C2)NC3=NC=C(C(=N3)NC4=CC=CC=C4P(=O)(C)C)Cl)OC	Chemogenomic candidate	10	0	human fibroblast	2	0	77	0.337662	0.662338	0.272727	0.333333	0.45098	0.215686	0.727273	0.235294	0.117647	0.0588235	99.3333	0.557903	0.293865	0.595118	0.111016	0.442097	0.112114	0.290215	0.0427216	#DIV/0!	tag healthy nuclei < 50 %
ALK-IN-1	Multiplex	EUB0000635a	CN(C)C1CCN(CC1)C2=CC(=C(C=C2)NC3=NC=C(C(=N3)NC4=CC=CC=C4P(=O)(C)C)Cl)OC	Chemogenomic candidate	10	0	HEK293T	2	0	155	0.0645161	0.935484	0.0707071	0.193103	0.124138	0.682759	0.929293	0.0714286	0.25	0.0357143	233.167	0.0929753	0.24237	0.0798532	0.677777	0.907025	0.0412417	0.171457	0.0110984	#DIV/0!	tag healthy nuclei < 50 %
ALK-IN-1	Multiplex	EUB0000635a	CN(C)C1CCN(CC1)C2=CC(=C(C=C2)NC3=NC=C(C(=N3)NC4=CC=CC=C4P(=O)(C)C)Cl)OC	Chemogenomic candidate	1	0	HEK293T	1	0	970	0.194444	0.805556	0.134783	0.437781	0.217391	0.344828	0.865217	0.0171233	0.0958904	0.0239726	865.667	0.13691	0.491163	0.230041	0.278796	0.86309	0.0185405	0.129798	0.0320833	#DIV/0!	tag healthy nuclei < 50 %
ALK-IN-1	Multiplex	EUB0000635a	CN(C)C1CCN(CC1)C2=CC(=C(C=C2)NC3=NC=C(C(=N3)NC4=CC=CC=C4P(=O)(C)C)Cl)OC	Chemogenomic candidate	10	24	human fibroblast	2	-0.99996	56	0.392857	0.607143	0.666667	0.352941	0.470588	0.176471	0.333333	0.416667	0.25	0	80.0833	0.552381	0.346171	0.555718	0.0981105	0.447619	0.11087	0.120814	0.103	231110	tag healthy nuclei < 50 %
ALK-IN-1	Multiplex	EUB0000635a	CN(C)C1CCN(CC1)C2=CC(=C(C=C2)NC3=NC=C(C(=N3)NC4=CC=CC=C4P(=O)(C)C)Cl)OC	Chemogenomic candidate	10	0	human fibroblast	1	0	91	0.10989	0.89011	0.592593	0.308642	0.358025	0.333333	0.407407	0.16	0.2	0	125.417	0.662404	0.310276	0.328567	0.361157	0.337596	0.203306	0.230525	0.0840641	#DIV/0!	tag healthy nuclei < 50 %
ALK-IN-1	Multiplex	EUB0000635a	CN(C)C1CCN(CC1)C2=CC(=C(C=C2)NC3=NC=C(C(=N3)NC4=CC=CC=C4P(=O)(C)C)Cl)OC	Chemogenomic candidate	1	24	human fibroblast	2	6.41612	58	0.327586	0.672414	0.571429	0.384615	0.435897	0.179487	0.428571	0.133333	0.0666667	0	80.0833	0.552381	0.346171	0.555718	0.0981105	0.447619	0.11087	0.120814	0.103	231110	tag healthy nuclei < 50 %
ALK-IN-1	Multiplex	EUB0000635a	CN(C)C1CCN(CC1)C2=CC(=C(C=C2)NC3=NC=C(C(=N3)NC4=CC=CC=C4P(=O)(C)C)Cl)OC	Chemogenomic candidate	10	0	HEK293T	1	0	253	0.110672	0.889328	0.38125	0.204444	0.0844444	0.711111	0.61875	0.0217391	0.73913	0	256.5	0.333294	0.212413	0.0958204	0.691766	0.666706	0.0141172	0.774309	0.00115741	#DIV/0!	tag healthy nuclei < 50 %, tag mitochondrial mass > 50 %
ALK-IN-1	Multiplex	EUB0000635a	CN(C)C1CCN(CC1)C2=CC(=C(C=C2)NC3=NC=C(C(=N3)NC4=CC=CC=C4P(=O)(C)C)Cl)OC	Chemogenomic candidate	10	12	U2OS	1	-0.863497	139	0.0503597	0.94964	0.380952	0.401515	0.280303	0.318182	0.619048	0.924528	0.471698	0.245283	199.167	0.369403	0.889153	0.0559111	0.0549359	0.630597	0.260916	0.219385	0.107163	1.00798	tag healthy nuclei < 50 %, tag tubulin effect > 50 %
ALK-IN-1	Multiplex	EUB0000635a	CN(C)C1CCN(CC1)C2=CC(=C(C=C2)NC3=NC=C(C(=N3)NC4=CC=CC=C4P(=O)(C)C)Cl)OC	Chemogenomic candidate	10	12	human fibroblast	1	2.93213	98	0.132653	0.867347	0.73913	0.458824	0.270588	0.270588	0.26087	0.692308	0.0769231	0.230769	107.083	0.631736	0.44459	0.220734	0.334676	0.368264	0.315502	0.0769574	0.274792	1.29875	tag healthy nuclei < 50 %, tag tubulin effect > 50 %
ALK-IN-1	Multiplex	EUB0000635a	CN(C)C1CCN(CC1)C2=CC(=C(C=C2)NC3=NC=C(C(=N3)NC4=CC=CC=C4P(=O)(C)C)Cl)OC	Chemogenomic candidate	10	48	human fibroblast	1	9.12739	94	0.223404	0.776596	0.875	0.410959	0.479452	0.109589	0.125	0.7	0.233333	0.2	110.667	0.531499	0.514801	0.276708	0.208491	0.468501	0.298464	0.0241518	0.276892	5.201	tag healthy nuclei < 50 %, tag tubulin effect > 50 %
ALK-IN-1	Multiplex	EUB0000635a	CN(C)C1CCN(CC1)C2=CC(=C(C=C2)NC3=NC=C(C(=N3)NC4=CC=CC=C4P(=O)(C)C)Cl)OC	Chemogenomic candidate	10	24	U2OS	1	-0.948781	222	0.166667	0.833333	0.95122	0.0810811	0.475676	0.443243	0.0487805	0.8	1	0.2	212.417	0.319581	0.825187	0.0885786	0.0862345	0.680419	0.098522	0.0722682	0.0503222	0.99162	tag healthy nuclei < 50 %, tag tubulin effect > 50 %, tag mitochondrial mass > 50 %
ALK-IN-1	Multiplex	EUB0000635a	CN(C)C1CCN(CC1)C2=CC(=C(C=C2)NC3=NC=C(C(=N3)NC4=CC=CC=C4P(=O)(C)C)Cl)OC	Chemogenomic candidate	10	12	U2OS	2	-0.689546	98	0.173469	0.826531	0.3	0.37037	0.259259	0.37037	0.7	0.833333	0.533333	0.166667	139.167	0.248909	0.881032	0.0702926	0.0486752	0.751091	0.279715	0.240817	0.0972624	1.01342	tag healthy nuclei < 50 %, tag tubulin effect > 50 %, tag mitochondrial mass > 50 %
ALK-IN-1	Multiplex	EUB0000635a	CN(C)C1CCN(CC1)C2=CC(=C(C=C2)NC3=NC=C(C(=N3)NC4=CC=CC=C4P(=O)(C)C)Cl)OC	Chemogenomic candidate	10	12	U2OS	2	-0.988381	73	0.164384	0.835616	0.88	0.327869	0.262295	0.409836	0.12	0.9	0.85	0.15	78.3333	0.502249	0.830741	0.0963907	0.0728682	0.497751	0.154861	0.0827165	0.0293447	1.11609	tag healthy nuclei < 50 %, tag tubulin effect > 50 %, tag mitochondrial mass > 50 %
ALK-IN-1	Multiplex	EUB0000635a	CN(C)C1CCN(CC1)C2=CC(=C(C=C2)NC3=NC=C(C(=N3)NC4=CC=CC=C4P(=O)(C)C)Cl)OC	Chemogenomic candidate	10	12	human fibroblast	2	-0.988381	73	0.164384	0.835616	0.88	0.327869	0.262295	0.409836	0.12	0.9	0.85	0.15	106.333	0.502249	0.830741	0.0963907	0.0728682	0.497751	0.154861	0.0827165	0.0293447	1.11609	tag healthy nuclei < 50 %, tag tubulin effect > 50 %, tag mitochondrial mass > 50 %
ALK-IN-1	Multiplex	EUB0000635a	CN(C)C1CCN(CC1)C2=CC(=C(C=C2)NC3=NC=C(C(=N3)NC4=CC=CC=C4P(=O)(C)C)Cl)OC	Chemogenomic candidate	10	12	HEK293T	2	0.0656581	142	0.126761	0.873239	0.588889	0.241935	0.0322581	0.725806	0.411111	1	0.866667	0.0333333	256.75	0.112092	0.454373	0.0637918	0.481836	0.887908	0.182057	0.132768	0.0724535	1.03765	tag healthy nuclei < 50 %, tag tubulin effect > 50 %, tag mitochondrial mass > 50 %
ALK-IN-1	Multiplex	EUB0000635a	CN(C)C1CCN(CC1)C2=CC(=C(C=C2)NC3=NC=C(C(=N3)NC4=CC=CC=C4P(=O)(C)C)Cl)OC	Chemogenomic candidate	10	24	HEK293T	1	0.1988	229	0.248908	0.751092	0.747368	0.319767	0.127907	0.552326	0.252632	0.981818	0.981818	0.0181818	293.167	0.429543	0.395461	0.147538	0.457001	0.570457	0.312274	0.510446	0.0420248	1.14297	tag healthy nuclei < 50 %, tag tubulin effect > 50 %, tag mitochondrial mass > 50 %
ALK-IN-1	Multiplex	EUB0000635a	CN(C)C1CCN(CC1)C2=CC(=C(C=C2)NC3=NC=C(C(=N3)NC4=CC=CC=C4P(=O)(C)C)Cl)OC	Chemogenomic candidate	10	12	U2OS	1	-0.961098	221	0.126697	0.873303	0.657143	0.284974	0.352332	0.362694	0.342857	0.945455	0.945455	0.0181818	165.75	0.37331	0.780206	0.114105	0.10569	0.62669	0.0951184	0.0845665	0.073208	1.05123	tag healthy nuclei < 50 %, tag tubulin effect > 50 %, tag mitochondrial mass > 50 %
ALK-IN-1	Multiplex	EUB0000635a	CN(C)C1CCN(CC1)C2=CC(=C(C=C2)NC3=NC=C(C(=N3)NC4=CC=CC=C4P(=O)(C)C)Cl)OC	Chemogenomic candidate	10	48	HEK293T	1	0.83805	239	0.238494	0.761506	0.77907	0.340659	0.186813	0.472527	0.22093	1	1	0	351.333	0.392717	0.429172	0.195155	0.375673	0.607283	0.266274	0.27356	0.0493784	0.987254	tag healthy nuclei < 50 %, tag tubulin effect > 50 %, tag mitochondrial mass > 50 %
ALK-IN-1	Multiplex	EUB0000635a	CN(C)C1CCN(CC1)C2=CC(=C(C=C2)NC3=NC=C(C(=N3)NC4=CC=CC=C4P(=O)(C)C)Cl)OC	Chemogenomic candidate	10	12	HEK293T	1	-0.210094	211	0.218009	0.781991	0.709091	0.230303	0.10303	0.666667	0.290909	0.973684	1	0	274.667	0.427177	0.372026	0.131275	0.496699	0.572823	0.324854	0.687273	0.0469186	1.209	tag healthy nuclei < 50 %, tag tubulin effect > 50 %, tag mitochondrial mass > 50 %
ALK-IN-1	Multiplex	EUB0000635a	CN(C)C1CCN(CC1)C2=CC(=C(C=C2)NC3=NC=C(C(=N3)NC4=CC=CC=C4P(=O)(C)C)Cl)OC	Chemogenomic candidate	10	24	HEK293T	2	-0.0759743	149	0.194631	0.805369	0.793103	0.2	0.075	0.725	0.206897	0.958333	0.958333	0	322.417	0.125402	0.652444	0.053119	0.294437	0.874598	0.274867	0.112063	0.0970907	1.01358	tag healthy nuclei < 50 %, tag tubulin effect > 50 %, tag mitochondrial mass > 50 %
ALK-IN-1	Multiplex	EUB0000635a	CN(C)C1CCN(CC1)C2=CC(=C(C=C2)NC3=NC=C(C(=N3)NC4=CC=CC=C4P(=O)(C)C)Cl)OC	Chemogenomic candidate	10	48	HEK293T	2	-0.087023	147	0.176871	0.823129	0.911111	0.173554	0.0826446	0.743802	0.0888889	0.857143	0.904762	0	594.833	0.0998693	0.826482	0.0664568	0.107061	0.900131	0.232673	0.0431769	0.0808889	1.00265	tag healthy nuclei < 50 %, tag tubulin effect > 50 %, tag mitochondrial mass > 50 %
ALK-IN-1	Multiplex	EUB0000635a	CN(C)C1CCN(CC1)C2=CC(=C(C=C2)NC3=NC=C(C(=N3)NC4=CC=CC=C4P(=O)(C)C)Cl)OC	Chemogenomic candidate	10	24	U2OS	2	-0.963457	75	0.386667	0.613333	0.925926	0.152174	0.26087	0.586957	0.0740741	1	0.857143	1	102.167	0.521098	0.831195	0.0931875	0.0756178	0.478902	0.166245	0.0748286	0.0347485	1.01542	tag healthy nuclei < 50 %, tag tubulin effect > 50 %, tag mitochondrial mass > 50 %, tag membrane permeabilized > 50 %
ALK-IN-1	Multiplex	EUB0000635a	CN(C)C1CCN(CC1)C2=CC(=C(C=C2)NC3=NC=C(C(=N3)NC4=CC=CC=C4P(=O)(C)C)Cl)OC	Chemogenomic candidate	10	24	human fibroblast	2	-0.963457	75	0.386667	0.613333	0.925926	0.152174	0.26087	0.586957	0.0740741	1	0.857143	1	108.083	0.521098	0.831195	0.0931875	0.0756178	0.478902	0.166245	0.0748286	0.0347485	1.01542	tag healthy nuclei < 50 %, tag tubulin effect > 50 %, tag mitochondrial mass > 50 %, tag membrane permeabilized > 50 %
ALK-IN-1	Multiplex	EUB0000635a	CN(C)C1CCN(CC1)C2=CC(=C(C=C2)NC3=NC=C(C(=N3)NC4=CC=CC=C4P(=O)(C)C)Cl)OC	Chemogenomic candidate	10	48	U2OS	2	-0.624229	73	0.452055	0.547945	1	0.375	0.225	0.4	0	0.933333	0.866667	0.933333	153.583	0.433939	0.864953	0.0805245	0.0545227	0.566061	0.197701	0.115167	0.0429551	1.00576	tag healthy nuclei < 50 %, tag tubulin effect > 50 %, tag mitochondrial mass > 50 %, tag membrane permeabilized > 50 %
ALK-IN-1	Multiplex	EUB0000635a	CN(C)C1CCN(CC1)C2=CC(=C(C=C2)NC3=NC=C(C(=N3)NC4=CC=CC=C4P(=O)(C)C)Cl)OC	Chemogenomic candidate	10	24	U2OS	1	-0.883047	136	0.147059	0.852941	0.873016	0.137931	0.318966	0.543103	0.126984	0.9375	0.75	0.8125	276.667	0.370298	0.917275	0.0423433	0.0403816	0.629702	0.31212	0.21103	0.0682442	1.0014	tag healthy nuclei < 50 %, tag tubulin effect > 50 %, tag mitochondrial mass > 50 %, tag membrane permeabilized > 50 %
ALK-IN-1	Multiplex	EUB0000635a	CN(C)C1CCN(CC1)C2=CC(=C(C=C2)NC3=NC=C(C(=N3)NC4=CC=CC=C4P(=O)(C)C)Cl)OC	Chemogenomic candidate	10	24	U2OS	2	-0.829077	102	0.254902	0.745098	0.8	0.131579	0.407895	0.460526	0.2	0.9	0.9	0.8	178.5	0.310463	0.888541	0.0624047	0.049054	0.689537	0.288716	0.291394	0.0647451	1.00514	tag healthy nuclei < 50 %, tag tubulin effect > 50 %, tag mitochondrial mass > 50 %, tag membrane permeabilized > 50 %
ALK-IN-1	Multiplex	EUB0000635a	CN(C)C1CCN(CC1)C2=CC(=C(C=C2)NC3=NC=C(C(=N3)NC4=CC=CC=C4P(=O)(C)C)Cl)OC	Chemogenomic candidate	10	48	U2OS	1	-0.589025	221	0.271493	0.728507	0.950617	0.0372671	0.459627	0.503106	0.0493827	1	1	0.666667	330	0.352767	0.881662	0.0538695	0.0644681	0.647233	0.102719	0.0952982	0.0225671	1.00252	tag healthy nuclei < 50 %, tag tubulin effect > 50 %, tag mitochondrial mass > 50 %, tag membrane permeabilized > 50 %
ALK-IN-1	Multiplex	EUB0000635a	CN(C)C1CCN(CC1)C2=CC(=C(C=C2)NC3=NC=C(C(=N3)NC4=CC=CC=C4P(=O)(C)C)Cl)OC	Chemogenomic candidate	10	48	human fibroblast	2	-0.308143	86	0.162791	0.837209	0.666667	0.611111	0.347222	0.0416667	0.333333	0.568182	0.0909091	0.227273	108	0.498611	0.755765	0.214424	0.0298114	0.501389	0.304063	0.0278827	0.153127	1.11404	tag tubulin effect > 50 %
ALK-IN-1	Multiplex	EUB0000635a	CN(C)C1CCN(CC1)C2=CC(=C(C=C2)NC3=NC=C(C(=N3)NC4=CC=CC=C4P(=O)(C)C)Cl)OC	Chemogenomic candidate	10	24	human fibroblast	1	1.69421	94	0.138298	0.861702	0.6875	0.506173	0.296296	0.197531	0.3125	0.707317	0.146341	0.170732	106.75	0.494315	0.513538	0.210808	0.275654	0.505685	0.339408	0.0326339	0.298699	1.11839	tag tubulin effect > 50 %
ALK-IN-1	Multiplex	EUB0000635a	CN(C)C1CCN(CC1)C2=CC(=C(C=C2)NC3=NC=C(C(=N3)NC4=CC=CC=C4P(=O)(C)C)Cl)OC	Chemogenomic candidate	10	12	HEK293T	1	-0.726846	606	0.20132	0.79868	0.212644	0.510331	0.130165	0.359504	0.787356	0.546559	0.251012	0.0647773	691.5	0.185934	0.698273	0.149796	0.151931	0.814066	0.0267306	0.0412745	0.044192	1.10218	tag tubulin effect > 50 %
ALK-IN-1	Multiplex	EUB0000635a	CN(C)C1CCN(CC1)C2=CC(=C(C=C2)NC3=NC=C(C(=N3)NC4=CC=CC=C4P(=O)(C)C)Cl)OC	Chemogenomic candidate	10	24	HEK293T	2	-0.00112976	899	0.0967742	0.903226	0.247706	0.815271	0.0504926	0.134236	0.752294	0.932024	0.60423	0.10423	3025.33	0.160951	0.737455	0.183731	0.0788139	0.839049	0.452063	0.229554	0.0699568	0.474195	tag tubulin effect > 50 %, tag mitochondrial mass > 50 %
ALK-IN-1	Multiplex	EUB0000635a	CN(C)C1CCN(CC1)C2=CC(=C(C=C2)NC3=NC=C(C(=N3)NC4=CC=CC=C4P(=O)(C)C)Cl)OC	Chemogenomic candidate	10	24	HEK293T	1	-0.413568	561	0.226381	0.773619	0.378788	0.550691	0.145161	0.304147	0.621212	0.736402	0.51046	0.0711297	838.25	0.154355	0.792279	0.137252	0.0704688	0.845645	0.0333863	0.0308318	0.0797788	1.0151	tag tubulin effect > 50 %, tag mitochondrial mass > 50 %
ALK-IN-1	Multiplex	EUB0000635a	CN(C)C1CCN(CC1)C2=CC(=C(C=C2)NC3=NC=C(C(=N3)NC4=CC=CC=C4P(=O)(C)C)Cl)OC	Chemogenomic candidate	10	12	HEK293T	2	0.0207178	933	0.0932476	0.906752	0.129496	0.797872	0.0378251	0.164303	0.870504	0.851852	0.545185	0.0622222	1765.83	0.0828653	0.866876	0.0909282	0.0421957	0.917135	0.0464362	0.0760075	0.0151675	0.999314	tag tubulin effect > 50 %, tag mitochondrial mass > 50 %
ALK-IN-1	Multiplex	EUB0000635a	CN(C)C1CCN(CC1)C2=CC(=C(C=C2)NC3=NC=C(C(=N3)NC4=CC=CC=C4P(=O)(C)C)Cl)OC	Chemogenomic candidate	1	12	U2OS	1	0.824673	211	0.028436	0.971564	0.357143	0.868293	0.0634146	0.0682927	0.642857	0.134831	0.0730337	0.123596	199.167	0.369403	0.889153	0.0559111	0.0549359	0.630597	0.260916	0.219385	0.107163	1.00798
ALK-IN-1	Multiplex	EUB0000635a	CN(C)C1CCN(CC1)C2=CC(=C(C=C2)NC3=NC=C(C(=N3)NC4=CC=CC=C4P(=O)(C)C)Cl)OC	Chemogenomic candidate	1	24	U2OS	1	0.710216	266	0.0300752	0.969925	0.470588	0.895349	0.0387597	0.0658915	0.529412	0.151515	0.103896	0.116883	276.667	0.370298	0.917275	0.0423433	0.0403816	0.629702	0.31212	0.21103	0.0682442	1.0014
ALK-IN-1	Multiplex	EUB0000635a	CN(C)C1CCN(CC1)C2=CC(=C(C=C2)NC3=NC=C(C(=N3)NC4=CC=CC=C4P(=O)(C)C)Cl)OC	Chemogenomic candidate	10	0	U2OS	1	0	128	0.0703125	0.929688	0	0.941176	0.0420168	0.0168067	1	0.178571	0.0803571	0.116071	156.5	0.597808	0.882455	0.0611652	0.0563801	0.402192	0.271242	0.126392	0.10096	0
ALK-IN-1	Multiplex	EUB0000635a	CN(C)C1CCN(CC1)C2=CC(=C(C=C2)NC3=NC=C(C(=N3)NC4=CC=CC=C4P(=O)(C)C)Cl)OC	Chemogenomic candidate	1	24	U2OS	2	0.739591	173	0.0520231	0.947977	0.5	0.859756	0.054878	0.0853659	0.5	0.184397	0.234043	0.106383	178.5	0.310463	0.888541	0.0624047	0.049054	0.689537	0.288716	0.291394	0.0647451	1.00514
ALK-IN-1	Multiplex	EUB0000635a	CN(C)C1CCN(CC1)C2=CC(=C(C=C2)NC3=NC=C(C(=N3)NC4=CC=CC=C4P(=O)(C)C)Cl)OC	Chemogenomic candidate	10	0	U2OS	1	0	215	0.0930233	0.906977	0.178571	0.728205	0.128205	0.14359	0.821429	0.15493	0.323944	0.105634	152.167	0.315784	0.706662	0.13121	0.162128	0.684216	0.118789	0.261243	0.0625529	0
ALK-IN-1	Multiplex	EUB0000635a	CN(C)C1CCN(CC1)C2=CC(=C(C=C2)NC3=NC=C(C(=N3)NC4=CC=CC=C4P(=O)(C)C)Cl)OC	Chemogenomic candidate	10	0	U2OS	2	0	88	0.215909	0.784091	0	0.884058	0.057971	0.057971	1	0.213115	0.131148	0.0819672	99.3333	#DIV/0!	0.877466	0.0854137	0.0371199	#DIV/0!	0.27287	0.183282	0.0858335	0
ALK-IN-1	Multiplex	EUB0000635a	CN(C)C1CCN(CC1)C2=CC(=C(C=C2)NC3=NC=C(C(=N3)NC4=CC=CC=C4P(=O)(C)C)Cl)OC	Chemogenomic candidate	1	12	human fibroblast	1	0.810534	202	0.148515	0.851485	0.642857	0.569767	0.267442	0.162791	0.357143	0.0612245	0.0612245	0.0816327	230.667	0.695283	0.596796	0.258529	0.144676	0.304717	0.0342007	0.0357415	0.0583164	1.23771
ALK-IN-1	Multiplex	EUB0000635a	CN(C)C1CCN(CC1)C2=CC(=C(C=C2)NC3=NC=C(C(=N3)NC4=CC=CC=C4P(=O)(C)C)Cl)OC	Chemogenomic candidate	1	0	U2OS	1	0	158	0.0316456	0.968354	0	0.928105	0.0588235	0.0130719	1	0.225352	0.0915493	0.0774648	156.5	0.597808	0.882455	0.0611652	0.0563801	0.402192	0.271242	0.126392	0.10096	0
ALK-IN-1	Multiplex	EUB0000635a	CN(C)C1CCN(CC1)C2=CC(=C(C=C2)NC3=NC=C(C(=N3)NC4=CC=CC=C4P(=O)(C)C)Cl)OC	Chemogenomic candidate	10	0	human fibroblast	1	0	256	0.101562	0.898438	0.658537	0.569565	0.252174	0.178261	0.341463	0.0229008	0.0763359	0.0687023	211.75	0.805591	0.539397	0.278942	0.181661	0.194409	0.021052	0.100182	0.0283348	#DIV/0!
ALK-IN-1	Multiplex	EUB0000635a	CN(C)C1CCN(CC1)C2=CC(=C(C=C2)NC3=NC=C(C(=N3)NC4=CC=CC=C4P(=O)(C)C)Cl)OC	Chemogenomic candidate	1	12	U2OS	2	0.373814	133	0.075188	0.924812	0.235294	0.788618	0.0731707	0.138211	0.764706	0.164948	0.164948	0.0618557	139.167	0.248909	0.881032	0.0702926	0.0486752	0.751091	0.279715	0.240817	0.0972624	1.01342
ALK-IN-1	Multiplex	EUB0000635a	CN(C)C1CCN(CC1)C2=CC(=C(C=C2)NC3=NC=C(C(=N3)NC4=CC=CC=C4P(=O)(C)C)Cl)OC	Chemogenomic candidate	1	24	human fibroblast	1	1.53681	204	0.142157	0.857843	0.965517	0.651429	0.182857	0.165714	0.0344828	0.0438596	0.0614035	0.0614035	242.833	0.651394	0.612787	0.255064	0.132149	0.348606	0.025027	0.0173706	0.0467803	1.19614
ALK-IN-1	Multiplex	EUB0000635a	CN(C)C1CCN(CC1)C2=CC(=C(C=C2)NC3=NC=C(C(=N3)NC4=CC=CC=C4P(=O)(C)C)Cl)OC	Chemogenomic candidate	1	24	HEK293T	1	0.516477	667	0.0974513	0.902549	0.146667	0.699336	0.17608	0.124585	0.853333	0.142518	0.0855107	0.0593824	838.25	0.154355	0.792279	0.137252	0.0704688	0.845645	0.0333863	0.0308318	0.0797788	1.0151
ALK-IN-1	Multiplex	EUB0000635a	CN(C)C1CCN(CC1)C2=CC(=C(C=C2)NC3=NC=C(C(=N3)NC4=CC=CC=C4P(=O)(C)C)Cl)OC	Chemogenomic candidate	10	0	human fibroblast	2	0	91	0.0549451	0.945055	0.666667	0.581395	0.27907	0.139535	0.333333	0.16	0.16	0.04	101.167	0.681754	0.642258	0.240072	0.11767	0.318246	0.20189	0.247166	0.0567674	#DIV/0!
ALK-IN-1	Multiplex	EUB0000635a	CN(C)C1CCN(CC1)C2=CC(=C(C=C2)NC3=NC=C(C(=N3)NC4=CC=CC=C4P(=O)(C)C)Cl)OC	Chemogenomic candidate	1	0	U2OS	2	0	112	0.196429	0.803571	0	0.888889	0.0888889	0.0222222	1	0.2	0.1	0.0375	99.3333	#DIV/0!	0.877466	0.0854137	0.0371199	#DIV/0!	0.27287	0.183282	0.0858335	0
ALK-IN-1	Multiplex	EUB0000635a	CN(C)C1CCN(CC1)C2=CC(=C(C=C2)NC3=NC=C(C(=N3)NC4=CC=CC=C4P(=O)(C)C)Cl)OC	Chemogenomic candidate	10	24	human fibroblast	1	0.178626	210	0.133333	0.866667	0.884615	0.543956	0.313187	0.142857	0.115385	0.131313	0.0909091	0.030303	242.833	0.651394	0.612787	0.255064	0.132149	0.348606	0.025027	0.0173706	0.0467803	1.19614
ALK-IN-1	Multiplex	EUB0000635a	CN(C)C1CCN(CC1)C2=CC(=C(C=C2)NC3=NC=C(C(=N3)NC4=CC=CC=C4P(=O)(C)C)Cl)OC	Chemogenomic candidate	1	24	HEK293T	2	0.573852	2108	0.0460152	0.953985	0.122449	0.771755	0.203879	0.024366	0.877551	0.197809	0.0438144	0.0302835	3025.33	0.160951	0.737455	0.183731	0.0788139	0.839049	0.452063	0.229554	0.0699568	0.474195
ALK-IN-1	Multiplex	EUB0000635a	CN(C)C1CCN(CC1)C2=CC(=C(C=C2)NC3=NC=C(C(=N3)NC4=CC=CC=C4P(=O)(C)C)Cl)OC	Chemogenomic candidate	1	12	HEK293T	1	0.83398	684	0.149123	0.850877	0.163636	0.61512	0.195876	0.189003	0.836364	0.0726257	0.0977654	0.0195531	691.5	0.185934	0.698273	0.149796	0.151931	0.814066	0.0267306	0.0412745	0.044192	1.10218
ALK-IN-1	Multiplex	EUB0000635a	CN(C)C1CCN(CC1)C2=CC(=C(C=C2)NC3=NC=C(C(=N3)NC4=CC=CC=C4P(=O)(C)C)Cl)OC	Chemogenomic candidate	10	0	U2OS	2	0	69	0.0289855	0.971014	0.454545	0.791045	0.0447761	0.164179	0.545455	0.113208	0.132075	0.0188679	70.3333	0.262184	0.811025	0.0807672	0.108207	0.737816	0.0985605	0.153729	0.0272522	0
ALK-IN-1	Multiplex	EUB0000635a	CN(C)C1CCN(CC1)C2=CC(=C(C=C2)NC3=NC=C(C(=N3)NC4=CC=CC=C4P(=O)(C)C)Cl)OC	Chemogenomic candidate	10	12	human fibroblast	1	0.784444	215	0.130233	0.869767	0.69697	0.57754	0.245989	0.176471	0.30303	0.166667	0.0648148	0.0185185	230.667	0.695283	0.596796	0.258529	0.144676	0.304717	0.0342007	0.0357415	0.0583164	1.23771
ALK-IN-1	Multiplex	EUB0000635a	CN(C)C1CCN(CC1)C2=CC(=C(C=C2)NC3=NC=C(C(=N3)NC4=CC=CC=C4P(=O)(C)C)Cl)OC	Chemogenomic candidate	10	0	HEK293T	1	0	824	0.166861	0.833139	0.147208	0.535014	0.189076	0.27591	0.852792	0.013089	0.143979	0.0157068	865.667	0.13691	0.491163	0.230041	0.278796	0.86309	0.0185405	0.129798	0.0320833	#DIV/0!
ALK-IN-1	Multiplex	EUB0000635a	CN(C)C1CCN(CC1)C2=CC(=C(C=C2)NC3=NC=C(C(=N3)NC4=CC=CC=C4P(=O)(C)C)Cl)OC	Chemogenomic candidate	1	12	HEK293T	2	0.281181	1309	0.052712	0.947288	0.144578	0.848387	0.0846774	0.0669355	0.855422	0.214829	0.198669	0.013308	1765.83	0.0828653	0.866876	0.0909282	0.0421957	0.917135	0.0464362	0.0760075	0.0151675	0.999314
ALK-IN-1	Multiplex	EUB0000635a	CN(C)C1CCN(CC1)C2=CC(=C(C=C2)NC3=NC=C(C(=N3)NC4=CC=CC=C4P(=O)(C)C)Cl)OC	Chemogenomic candidate	1	0	human fibroblast	1	0	232	0.0775862	0.922414	0.878788	0.626168	0.219626	0.154206	0.121212	0.0223881	0.104478	0.00746269	211.75	0.805591	0.539397	0.278942	0.181661	0.194409	0.021052	0.100182	0.0283348	#DIV/0!
ALK-IN-1	Multiplex	EUB0000635a	CN(C)C1CCN(CC1)C2=CC(=C(C=C2)NC3=NC=C(C(=N3)NC4=CC=CC=C4P(=O)(C)C)Cl)OC	Chemogenomic candidate	1	0	HEK293T	2	0	1102	0.022686	0.977314	0.145349	0.786444	0.0538533	0.159703	0.854651	0.00472255	0.298701	0.00236128	1080.25	0.142406	0.776982	0.0533037	0.169714	0.857594	0.00453037	0.323128	0.00113292	#DIV/0!
ALK-IN-1	Multiplex	EUB0000635a	CN(C)C1CCN(CC1)C2=CC(=C(C=C2)NC3=NC=C(C(=N3)NC4=CC=CC=C4P(=O)(C)C)Cl)OC	Chemogenomic candidate	10	0	HEK293T	2	0	918	0.0272331	0.972767	0.119048	0.742441	0.0694289	0.18813	0.880952	0.0015083	0.254902	0.0015083	1080.25	0.142406	0.776982	0.0533037	0.169714	0.857594	0.00453037	0.323128	0.00113292	#DIV/0!
APD668	Multiplex	EUB0000488a	CC(C)OC(=O)N1CCC(CC1)OC1=C2C=NN(C2=NC=N1)C1=CC=C(C=C1F)S(C)(=O)=O	Chemogenomic candidate	1	0	human fibroblast	1	0	81	0.160494	0.839506	0.7	0.279412	0.426471	0.294118	0.3	0.210526	0.263158	0.105263	125.417	0.662404	0.310276	0.328567	0.361157	0.337596	0.203306	0.230525	0.0840641	#DIV/0!	tag healthy nuclei < 50 %
APD668	Multiplex	EUB0000488a	CC(C)OC(=O)N1CCC(CC1)OC1=C2C=NN(C2=NC=N1)C1=CC=C(C=C1F)S(C)(=O)=O	Chemogenomic candidate	10	12	HEK293T	2	0.632389	220	0.0363636	0.963636	0.0576923	0.457547	0.0518868	0.490566	0.942308	0.206186	0.154639	0.0824742	256.75	0.112092	0.454373	0.0637918	0.481836	0.887908	0.182057	0.132768	0.0724535	1.03765	tag healthy nuclei < 50 %
APD668	Multiplex	EUB0000488a	CC(C)OC(=O)N1CCC(CC1)OC1=C2C=NN(C2=NC=N1)C1=CC=C(C=C1F)S(C)(=O)=O	Chemogenomic candidate	1	12	HEK293T	2	1.43401	220	0.0409091	0.959091	0.12766	0.49763	0.056872	0.445498	0.87234	0.0952381	0.114286	0.0571429	256.75	0.112092	0.454373	0.0637918	0.481836	0.887908	0.182057	0.132768	0.0724535	1.03765	tag healthy nuclei < 50 %
APD668	Multiplex	EUB0000488a	CC(C)OC(=O)N1CCC(CC1)OC1=C2C=NN(C2=NC=N1)C1=CC=C(C=C1F)S(C)(=O)=O	Chemogenomic candidate	1	48	HEK293T	1	1.42216	312	0.163462	0.836538	0.59375	0.48659	0.145594	0.367816	0.40625	0.251969	0.212598	0.0551181	351.333	0.392717	0.429172	0.195155	0.375673	0.607283	0.266274	0.27356	0.0493784	0.987254	tag healthy nuclei < 50 %
APD668	Multiplex	EUB0000488a	CC(C)OC(=O)N1CCC(CC1)OC1=C2C=NN(C2=NC=N1)C1=CC=C(C=C1F)S(C)(=O)=O	Chemogenomic candidate	1	0	HEK293T	2	0	194	0.0463918	0.953608	0.100775	0.216216	0.0864865	0.697297	0.899225	0	0.075	0.025	233.167	0.0929753	0.24237	0.0798532	0.677777	0.907025	0.0412417	0.171457	0.0110984	#DIV/0!	tag healthy nuclei < 50 %
APD668	Multiplex	EUB0000488a	CC(C)OC(=O)N1CCC(CC1)OC1=C2C=NN(C2=NC=N1)C1=CC=C(C=C1F)S(C)(=O)=O	Chemogenomic candidate	10	0	human fibroblast	1	0	175	0.12	0.88	0.766667	0.350649	0.25974	0.38961	0.233333	0.166667	0.277778	0	125.417	0.662404	0.310276	0.328567	0.361157	0.337596	0.203306	0.230525	0.0840641	#DIV/0!	tag healthy nuclei < 50 %
APD668	Multiplex	EUB0000488a	CC(C)OC(=O)N1CCC(CC1)OC1=C2C=NN(C2=NC=N1)C1=CC=C(C=C1F)S(C)(=O)=O	Chemogenomic candidate	10	0	HEK293T	2	0	189	0.0529101	0.94709	0.0636364	0.318436	0.0670391	0.614525	0.936364	0.0175439	0.105263	0	233.167	0.0929753	0.24237	0.0798532	0.677777	0.907025	0.0412417	0.171457	0.0110984	#DIV/0!	tag healthy nuclei < 50 %
APD668	Multiplex	EUB0000488a	CC(C)OC(=O)N1CCC(CC1)OC1=C2C=NN(C2=NC=N1)C1=CC=C(C=C1F)S(C)(=O)=O	Chemogenomic candidate	1	24	HEK293T	1	1.26349	254	0.15748	0.84252	0.519231	0.397196	0.116822	0.485981	0.480769	0.352941	0.588235	0.0470588	293.167	0.429543	0.395461	0.147538	0.457001	0.570457	0.312274	0.510446	0.0420248	1.14297	tag healthy nuclei < 50 %, tag mitochondrial mass > 50 %
APD668	Multiplex	EUB0000488a	CC(C)OC(=O)N1CCC(CC1)OC1=C2C=NN(C2=NC=N1)C1=CC=C(C=C1F)S(C)(=O)=O	Chemogenomic candidate	1	12	HEK293T	1	1.05101	225	0.142222	0.857778	0.577982	0.352332	0.0829016	0.564767	0.422018	0.397059	0.808824	0.0441176	274.667	0.427177	0.372026	0.131275	0.496699	0.572823	0.324854	0.687273	0.0469186	1.209	tag healthy nuclei < 50 %, tag mitochondrial mass > 50 %
APD668	Multiplex	EUB0000488a	CC(C)OC(=O)N1CCC(CC1)OC1=C2C=NN(C2=NC=N1)C1=CC=C(C=C1F)S(C)(=O)=O	Chemogenomic candidate	10	0	HEK293T	1	0	196	0.158163	0.841837	0.378378	0.187879	0.139394	0.672727	0.621622	0	0.806452	0	256.5	0.333294	0.212413	0.0958204	0.691766	0.666706	0.0141172	0.774309	0.00115741	#DIV/0!	tag healthy nuclei < 50 %, tag mitochondrial mass > 50 %
APD668	Multiplex	EUB0000488a	CC(C)OC(=O)N1CCC(CC1)OC1=C2C=NN(C2=NC=N1)C1=CC=C(C=C1F)S(C)(=O)=O	Chemogenomic candidate	1	0	HEK293T	1	0	212	0.117925	0.882075	0.410853	0.203209	0.106952	0.68984	0.589147	0.0789474	0.710526	0	256.5	0.333294	0.212413	0.0958204	0.691766	0.666706	0.0141172	0.774309	0.00115741	#DIV/0!	tag healthy nuclei < 50 %, tag mitochondrial mass > 50 %
APD668	Multiplex	EUB0000488a	CC(C)OC(=O)N1CCC(CC1)OC1=C2C=NN(C2=NC=N1)C1=CC=C(C=C1F)S(C)(=O)=O	Chemogenomic candidate	10	24	human fibroblast	1	0.494866	156	0.121795	0.878205	0.432432	0.481752	0.248175	0.270073	0.567568	0.727273	0.166667	0.30303	106.75	0.494315	0.513538	0.210808	0.275654	0.505685	0.339408	0.0326339	0.298699	1.11839	tag healthy nuclei < 50 %, tag tubulin effect > 50 %
APD668	Multiplex	EUB0000488a	CC(C)OC(=O)N1CCC(CC1)OC1=C2C=NN(C2=NC=N1)C1=CC=C(C=C1F)S(C)(=O)=O	Chemogenomic candidate	10	12	human fibroblast	1	0.607416	164	0.109756	0.890244	0.588235	0.431507	0.219178	0.349315	0.411765	0.587302	0.222222	0.174603	107.083	0.631736	0.44459	0.220734	0.334676	0.368264	0.315502	0.0769574	0.274792	1.29875	tag healthy nuclei < 50 %, tag tubulin effect > 50 %
APD668	Multiplex	EUB0000488a	CC(C)OC(=O)N1CCC(CC1)OC1=C2C=NN(C2=NC=N1)C1=CC=C(C=C1F)S(C)(=O)=O	Chemogenomic candidate	10	12	HEK293T	1	0.759722	186	0.182796	0.817204	0.538462	0.322368	0.164474	0.513158	0.461538	0.612245	0.938776	0.0612245	274.667	0.427177	0.372026	0.131275	0.496699	0.572823	0.324854	0.687273	0.0469186	1.209	tag healthy nuclei < 50 %, tag tubulin effect > 50 %, tag mitochondrial mass > 50 %
APD668	Multiplex	EUB0000488a	CC(C)OC(=O)N1CCC(CC1)OC1=C2C=NN(C2=NC=N1)C1=CC=C(C=C1F)S(C)(=O)=O	Chemogenomic candidate	10	48	HEK293T	1	0.33343	237	0.164557	0.835443	0.506329	0.419192	0.181818	0.39899	0.493671	0.53012	0.60241	0.0361446	351.333	0.392717	0.429172	0.195155	0.375673	0.607283	0.266274	0.27356	0.0493784	0.987254	tag healthy nuclei < 50 %, tag tubulin effect > 50 %, tag mitochondrial mass > 50 %
APD668	Multiplex	EUB0000488a	CC(C)OC(=O)N1CCC(CC1)OC1=C2C=NN(C2=NC=N1)C1=CC=C(C=C1F)S(C)(=O)=O	Chemogenomic candidate	10	24	HEK293T	1	0.987437	194	0.180412	0.819588	0.467532	0.383648	0.132075	0.484277	0.532468	0.672131	0.754098	0.0163934	293.167	0.429543	0.395461	0.147538	0.457001	0.570457	0.312274	0.510446	0.0420248	1.14297	tag healthy nuclei < 50 %, tag tubulin effect > 50 %, tag mitochondrial mass > 50 %
APD668	Multiplex	EUB0000488a	CC(C)OC(=O)N1CCC(CC1)OC1=C2C=NN(C2=NC=N1)C1=CC=C(C=C1F)S(C)(=O)=O	Chemogenomic candidate	10	48	human fibroblast	1	-0.264641	143	0.174825	0.825175	0.464286	0.516949	0.245763	0.237288	0.535714	0.737705	0.147541	0.295082	110.667	0.531499	0.514801	0.276708	0.208491	0.468501	0.298464	0.0241518	0.276892	5.201	tag tubulin effect > 50 %
APD668	Multiplex	EUB0000488a	CC(C)OC(=O)N1CCC(CC1)OC1=C2C=NN(C2=NC=N1)C1=CC=C(C=C1F)S(C)(=O)=O	Chemogenomic candidate	1	24	human fibroblast	1	3.89987	83	0.13253	0.86747	0.666667	0.583333	0.208333	0.208333	0.333333	0.452381	0.047619	0.333333	106.75	0.494315	0.513538	0.210808	0.275654	0.505685	0.339408	0.0326339	0.298699	1.11839
APD668	Multiplex	EUB0000488a	CC(C)OC(=O)N1CCC(CC1)OC1=C2C=NN(C2=NC=N1)C1=CC=C(C=C1F)S(C)(=O)=O	Chemogenomic candidate	1	48	human fibroblast	2	-0.113157	73	0.136986	0.863014	#DIV/0!	0.746032	0.253968	0	#DIV/0!	0.446809	0.0212766	0.319149	108	0.498611	0.755765	0.214424	0.0298114	0.501389	0.304063	0.0278827	0.153127	1.11404
APD668	Multiplex	EUB0000488a	CC(C)OC(=O)N1CCC(CC1)OC1=C2C=NN(C2=NC=N1)C1=CC=C(C=C1F)S(C)(=O)=O	Chemogenomic candidate	1	48	human fibroblast	1	1.81384	99	0.252525	0.747475	0.777778	0.527027	0.351351	0.121622	0.222222	0.358974	0	0.282051	110.667	0.531499	0.514801	0.276708	0.208491	0.468501	0.298464	0.0241518	0.276892	5.201
APD668	Multiplex	EUB0000488a	CC(C)OC(=O)N1CCC(CC1)OC1=C2C=NN(C2=NC=N1)C1=CC=C(C=C1F)S(C)(=O)=O	Chemogenomic candidate	1	12	human fibroblast	1	6.78408	86	0.139535	0.860465	0.647059	0.5	0.27027	0.22973	0.352941	0.243243	0	0.27027	107.083	0.631736	0.44459	0.220734	0.334676	0.368264	0.315502	0.0769574	0.274792	1.29875
APD668	Multiplex	EUB0000488a	CC(C)OC(=O)N1CCC(CC1)OC1=C2C=NN(C2=NC=N1)C1=CC=C(C=C1F)S(C)(=O)=O	Chemogenomic candidate	10	48	human fibroblast	2	0.662782	99	0.0707071	0.929293	0.666667	0.73913	0.228261	0.0326087	0.333333	0.441176	0.0441176	0.147059	108	0.498611	0.755765	0.214424	0.0298114	0.501389	0.304063	0.0278827	0.153127	1.11404
APD668	Multiplex	EUB0000488a	CC(C)OC(=O)N1CCC(CC1)OC1=C2C=NN(C2=NC=N1)C1=CC=C(C=C1F)S(C)(=O)=O	Chemogenomic candidate	1	24	HEK293T	2	1.08036	277	0.0361011	0.963899	0.1125	0.625468	0.0749064	0.299625	0.8875	0.161677	0.11976	0.0958084	322.417	0.125402	0.652444	0.053119	0.294437	0.874598	0.274867	0.112063	0.0970907	1.01358
APD668	Multiplex	EUB0000488a	CC(C)OC(=O)N1CCC(CC1)OC1=C2C=NN(C2=NC=N1)C1=CC=C(C=C1F)S(C)(=O)=O	Chemogenomic candidate	10	0	U2OS	1	0	202	0.0891089	0.910891	0.275862	0.711957	0.130435	0.157609	0.724138	0.145038	0.450382	0.0916031	152.167	0.315784	0.706662	0.13121	0.162128	0.684216	0.118789	0.261243	0.0625529	0
APD668	Multiplex	EUB0000488a	CC(C)OC(=O)N1CCC(CC1)OC1=C2C=NN(C2=NC=N1)C1=CC=C(C=C1F)S(C)(=O)=O	Chemogenomic candidate	1	48	U2OS	2	1.17887	199	0.0201005	0.979899	0.307692	0.882051	0.0512821	0.0666667	0.692308	0.0930233	0.104651	0.0755814	153.583	0.433939	0.864953	0.0805245	0.0545227	0.566061	0.197701	0.115167	0.0429551	1.00576
APD668	Multiplex	EUB0000488a	CC(C)OC(=O)N1CCC(CC1)OC1=C2C=NN(C2=NC=N1)C1=CC=C(C=C1F)S(C)(=O)=O	Chemogenomic candidate	1	12	U2OS	1	0.977077	95	0.0631579	0.936842	0.571429	0.808989	0.11236	0.0786517	0.428571	0.125	0.0833333	0.0694444	165.75	0.37331	0.780206	0.114105	0.10569	0.62669	0.0951184	0.0845665	0.073208	1.05123
APD668	Multiplex	EUB0000488a	CC(C)OC(=O)N1CCC(CC1)OC1=C2C=NN(C2=NC=N1)C1=CC=C(C=C1F)S(C)(=O)=O	Chemogenomic candidate	10	12	U2OS	1	0.940723	221	0.0678733	0.932127	0.208333	0.771845	0.11165	0.116505	0.791667	0.245283	0.194969	0.0691824	165.75	0.37331	0.780206	0.114105	0.10569	0.62669	0.0951184	0.0845665	0.073208	1.05123
APD668	Multiplex	EUB0000488a	CC(C)OC(=O)N1CCC(CC1)OC1=C2C=NN(C2=NC=N1)C1=CC=C(C=C1F)S(C)(=O)=O	Chemogenomic candidate	1	0	U2OS	1	0	93	0.0860215	0.913978	0.333333	0.694118	0.129412	0.176471	0.666667	0.101695	0.220339	0.0677966	152.167	0.315784	0.706662	0.13121	0.162128	0.684216	0.118789	0.261243	0.0625529	0
APD668	Multiplex	EUB0000488a	CC(C)OC(=O)N1CCC(CC1)OC1=C2C=NN(C2=NC=N1)C1=CC=C(C=C1F)S(C)(=O)=O	Chemogenomic candidate	1	0	U2OS	2	0	81	0.0493827	0.950617	0.363636	0.818182	0.038961	0.142857	0.636364	0.0634921	0.15873	0.0634921	70.3333	0.262184	0.811025	0.0807672	0.108207	0.737816	0.0985605	0.153729	0.0272522	0
APD668	Multiplex	EUB0000488a	CC(C)OC(=O)N1CCC(CC1)OC1=C2C=NN(C2=NC=N1)C1=CC=C(C=C1F)S(C)(=O)=O	Chemogenomic candidate	1	24	U2OS	1	0.903286	123	0.0650407	0.934959	0.571429	0.834783	0.104348	0.0608696	0.428571	0.114583	0.0520833	0.0520833	212.417	0.319581	0.825187	0.0885786	0.0862345	0.680419	0.098522	0.0722682	0.0503222	0.99162
APD668	Multiplex	EUB0000488a	CC(C)OC(=O)N1CCC(CC1)OC1=C2C=NN(C2=NC=N1)C1=CC=C(C=C1F)S(C)(=O)=O	Chemogenomic candidate	1	24	U2OS	2	1.0591	116	0.0258621	0.974138	0.5	0.867257	0.0442478	0.0884956	0.5	0.0918367	0.0408163	0.0510204	102.167	0.521098	0.831195	0.0931875	0.0756178	0.478902	0.166245	0.0748286	0.0347485	1.01542
APD668	Multiplex	EUB0000488a	CC(C)OC(=O)N1CCC(CC1)OC1=C2C=NN(C2=NC=N1)C1=CC=C(C=C1F)S(C)(=O)=O	Chemogenomic candidate	1	24	human fibroblast	2	1.0591	116	0.0258621	0.974138	0.5	0.867257	0.0442478	0.0884956	0.5	0.0918367	0.0408163	0.0510204	108.083	0.521098	0.831195	0.0931875	0.0756178	0.478902	0.166245	0.0748286	0.0347485	1.01542
APD668	Multiplex	EUB0000488a	CC(C)OC(=O)N1CCC(CC1)OC1=C2C=NN(C2=NC=N1)C1=CC=C(C=C1F)S(C)(=O)=O	Chemogenomic candidate	1	12	U2OS	2	2.33664	97	0.0721649	0.927835	0.333333	0.911111	0.0555556	0.0333333	0.666667	0.0731707	0.0853659	0.0487805	78.3333	0.502249	0.830741	0.0963907	0.0728682	0.497751	0.154861	0.0827165	0.0293447	1.11609
APD668	Multiplex	EUB0000488a	CC(C)OC(=O)N1CCC(CC1)OC1=C2C=NN(C2=NC=N1)C1=CC=C(C=C1F)S(C)(=O)=O	Chemogenomic candidate	1	12	human fibroblast	2	2.33664	97	0.0721649	0.927835	0.333333	0.911111	0.0555556	0.0333333	0.666667	0.0731707	0.0853659	0.0487805	106.333	0.502249	0.830741	0.0963907	0.0728682	0.497751	0.154861	0.0827165	0.0293447	1.11609
APD668	Multiplex	EUB0000488a	CC(C)OC(=O)N1CCC(CC1)OC1=C2C=NN(C2=NC=N1)C1=CC=C(C=C1F)S(C)(=O)=O	Chemogenomic candidate	10	24	HEK293T	2	0.740304	268	0.0373134	0.962687	0.0379747	0.651163	0.0426357	0.306202	0.962025	0.291667	0.220238	0.047619	322.417	0.125402	0.652444	0.053119	0.294437	0.874598	0.274867	0.112063	0.0970907	1.01358
APD668	Multiplex	EUB0000488a	CC(C)OC(=O)N1CCC(CC1)OC1=C2C=NN(C2=NC=N1)C1=CC=C(C=C1F)S(C)(=O)=O	Chemogenomic candidate	10	48	HEK293T	2	0.828888	480	0.03125	0.96875	0.111111	0.825806	0.0580645	0.116129	0.888889	0.231771	0.0390625	0.0416667	594.833	0.0998693	0.826482	0.0664568	0.107061	0.900131	0.232673	0.0431769	0.0808889	1.00265
APD668	Multiplex	EUB0000488a	CC(C)OC(=O)N1CCC(CC1)OC1=C2C=NN(C2=NC=N1)C1=CC=C(C=C1F)S(C)(=O)=O	Chemogenomic candidate	1	0	human fibroblast	2	0	83	0.108434	0.891566	0.818182	0.662162	0.189189	0.148649	0.181818	0.183673	0.244898	0.0408163	101.167	0.681754	0.642258	0.240072	0.11767	0.318246	0.20189	0.247166	0.0567674	#DIV/0!
APD668	Multiplex	EUB0000488a	CC(C)OC(=O)N1CCC(CC1)OC1=C2C=NN(C2=NC=N1)C1=CC=C(C=C1F)S(C)(=O)=O	Chemogenomic candidate	1	48	HEK293T	2	0.997375	463	0.0345572	0.965443	0.0588235	0.796421	0.0894855	0.114094	0.941176	0.179775	0.0421348	0.0337079	594.833	0.0998693	0.826482	0.0664568	0.107061	0.900131	0.232673	0.0431769	0.0808889	1.00265
APD668	Multiplex	EUB0000488a	CC(C)OC(=O)N1CCC(CC1)OC1=C2C=NN(C2=NC=N1)C1=CC=C(C=C1F)S(C)(=O)=O	Chemogenomic candidate	10	48	U2OS	1	0.959995	324	0.0277778	0.972222	0.351351	0.825397	0.0571429	0.11746	0.648649	0.0884615	0.130769	0.0269231	330	0.352767	0.881662	0.0538695	0.0644681	0.647233	0.102719	0.0952982	0.0225671	1.00252
APD668	Multiplex	EUB0000488a	CC(C)OC(=O)N1CCC(CC1)OC1=C2C=NN(C2=NC=N1)C1=CC=C(C=C1F)S(C)(=O)=O	Chemogenomic candidate	10	48	U2OS	2	1.2588	157	0.0191083	0.980892	0.4	0.928571	0.038961	0.0324675	0.6	0.377622	0.125874	0.020979	153.583	0.433939	0.864953	0.0805245	0.0545227	0.566061	0.197701	0.115167	0.0429551	1.00576
APD668	Multiplex	EUB0000488a	CC(C)OC(=O)N1CCC(CC1)OC1=C2C=NN(C2=NC=N1)C1=CC=C(C=C1F)S(C)(=O)=O	Chemogenomic candidate	10	0	U2OS	2	0	71	0.084507	0.915493	0.222222	0.769231	0.0923077	0.138462	0.777778	0.3	0.18	0.02	70.3333	0.262184	0.811025	0.0807672	0.108207	0.737816	0.0985605	0.153729	0.0272522	0
APD668	Multiplex	EUB0000488a	CC(C)OC(=O)N1CCC(CC1)OC1=C2C=NN(C2=NC=N1)C1=CC=C(C=C1F)S(C)(=O)=O	Chemogenomic candidate	1	48	U2OS	1	0.440276	193	0.0466321	0.953368	0.277778	0.836957	0.0652174	0.0978261	0.722222	0.0584416	0.103896	0.0194805	330	0.352767	0.881662	0.0538695	0.0644681	0.647233	0.102719	0.0952982	0.0225671	1.00252
APD668	Multiplex	EUB0000488a	CC(C)OC(=O)N1CCC(CC1)OC1=C2C=NN(C2=NC=N1)C1=CC=C(C=C1F)S(C)(=O)=O	Chemogenomic candidate	10	0	human fibroblast	2	0	95	0.0736842	0.926316	0.818182	0.647727	0.227273	0.125	0.181818	0.175439	0.333333	0.0175439	101.167	0.681754	0.642258	0.240072	0.11767	0.318246	0.20189	0.247166	0.0567674	#DIV/0!
APD668	Multiplex	EUB0000488a	CC(C)OC(=O)N1CCC(CC1)OC1=C2C=NN(C2=NC=N1)C1=CC=C(C=C1F)S(C)(=O)=O	Chemogenomic candidate	10	24	U2OS	1	0.600839	248	0.0483871	0.951613	0.208333	0.792373	0.105932	0.101695	0.791667	0.139037	0.144385	0.0160428	212.417	0.319581	0.825187	0.0885786	0.0862345	0.680419	0.098522	0.0722682	0.0503222	0.99162
APD668	Multiplex	EUB0000488a	CC(C)OC(=O)N1CCC(CC1)OC1=C2C=NN(C2=NC=N1)C1=CC=C(C=C1F)S(C)(=O)=O	Chemogenomic candidate	10	24	U2OS	2	1.15614	93	0.0215054	0.978495	0.333333	0.879121	0.0549451	0.0659341	0.666667	0.3125	0.025	0.0125	102.167	0.521098	0.831195	0.0931875	0.0756178	0.478902	0.166245	0.0748286	0.0347485	1.01542
APD668	Multiplex	EUB0000488a	CC(C)OC(=O)N1CCC(CC1)OC1=C2C=NN(C2=NC=N1)C1=CC=C(C=C1F)S(C)(=O)=O	Chemogenomic candidate	10	24	human fibroblast	2	1.15614	93	0.0215054	0.978495	0.333333	0.879121	0.0549451	0.0659341	0.666667	0.3125	0.025	0.0125	108.083	0.521098	0.831195	0.0931875	0.0756178	0.478902	0.166245	0.0748286	0.0347485	1.01542
APD668	Multiplex	EUB0000488a	CC(C)OC(=O)N1CCC(CC1)OC1=C2C=NN(C2=NC=N1)C1=CC=C(C=C1F)S(C)(=O)=O	Chemogenomic candidate	10	12	U2OS	2	0.196374	72	0.0694444	0.930556	0.181818	0.776119	0.0597015	0.164179	0.818182	0.288462	0.0576923	0	78.3333	0.502249	0.830741	0.0963907	0.0728682	0.497751	0.154861	0.0827165	0.0293447	1.11609
APD668	Multiplex	EUB0000488a	CC(C)OC(=O)N1CCC(CC1)OC1=C2C=NN(C2=NC=N1)C1=CC=C(C=C1F)S(C)(=O)=O	Chemogenomic candidate	10	12	human fibroblast	2	0.196374	72	0.0694444	0.930556	0.181818	0.776119	0.0597015	0.164179	0.818182	0.288462	0.0576923	0	106.333	0.502249	0.830741	0.0963907	0.0728682	0.497751	0.154861	0.0827165	0.0293447	1.11609
ASP3026	Multiplex	EUB0000688a	CC(C)S(=O)(=O)C1=CC=CC=C1NC2=NC(=NC=N2)NC3=C(C=C(C=C3)N4CCC(CC4)N5CCN(CC5)C)OC	Chemogenomic candidate	10	0	human fibroblast	2	0	84	0.392857	0.607143	0.4	0.294118	0.607843	0.0980392	0.6	0.0666667	0.4	0.0666667	99.3333	0.557903	0.293865	0.595118	0.111016	0.442097	0.112114	0.290215	0.0427216	#DIV/0!	tag healthy nuclei < 50 %
ASP3026	Multiplex	EUB0000688a	CC(C)S(=O)(=O)C1=CC=CC=C1NC2=NC(=NC=N2)NC3=C(C=C(C=C3)N4CCC(CC4)N5CCN(CC5)C)OC	Chemogenomic candidate	10	24	human fibroblast	2	-1	70	0.457143	0.542857	0.5	0.184211	0.763158	0.0526316	0.5	0.571429	0.428571	0.142857	80.0833	0.552381	0.346171	0.555718	0.0981105	0.447619	0.11087	0.120814	0.103	231110	tag healthy nuclei < 50 %, tag tubulin effect > 50 %
ASP3026	Multiplex	EUB0000688a	CC(C)S(=O)(=O)C1=CC=CC=C1NC2=NC(=NC=N2)NC3=C(C=C(C=C3)N4CCC(CC4)N5CCN(CC5)C)OC	Chemogenomic candidate	10	12	HEK293T	1	-0.964286	635	0.266142	0.733858	0.237885	0.33691	0.175966	0.487124	0.762115	0.687898	0.369427	0.127389	691.5	0.185934	0.698273	0.149796	0.151931	0.814066	0.0267306	0.0412745	0.044192	1.10218	tag healthy nuclei < 50 %, tag tubulin effect > 50 %
ASP3026	Multiplex	EUB0000688a	CC(C)S(=O)(=O)C1=CC=CC=C1NC2=NC(=NC=N2)NC3=C(C=C(C=C3)N4CCC(CC4)N5CCN(CC5)C)OC	Chemogenomic candidate	10	24	HEK293T	1	-0.673264	606	0.249175	0.750825	0.256545	0.395604	0.184615	0.41978	0.743455	0.677778	0.272222	0.105556	838.25	0.154355	0.792279	0.137252	0.0704688	0.845645	0.0333863	0.0308318	0.0797788	1.0151	tag healthy nuclei < 50 %, tag tubulin effect > 50 %
ASP3026	Multiplex	EUB0000688a	CC(C)S(=O)(=O)C1=CC=CC=C1NC2=NC(=NC=N2)NC3=C(C=C(C=C3)N4CCC(CC4)N5CCN(CC5)C)OC	Chemogenomic candidate	10	12	human fibroblast	2	39925.6	81	0.382716	0.617284	0.8	0.24	0.66	0.1	0.2	0.666667	0.166667	0.0833333	84.3333	0.520833	0.311795	0.58592	0.102285	0.479167	0.125354	0.149616	0.0949875	7.64557e+11	tag healthy nuclei < 50 %, tag tubulin effect > 50 %
ASP3026	Multiplex	EUB0000688a	CC(C)S(=O)(=O)C1=CC=CC=C1NC2=NC(=NC=N2)NC3=C(C=C(C=C3)N4CCC(CC4)N5CCN(CC5)C)OC	Chemogenomic candidate	10	24	human fibroblast	2	130002	112	0.535714	0.464286	1	0.288462	0.673077	0.0384615	0	0.133333	0	0.266667	80.0833	0.552381	0.346171	0.555718	0.0981105	0.447619	0.11087	0.120814	0.103	231110	tag Hoechst High Intensity, tag healthy nuclei < 50 %
ASP3026	Multiplex	EUB0000688a	CC(C)S(=O)(=O)C1=CC=CC=C1NC2=NC(=NC=N2)NC3=C(C=C(C=C3)N4CCC(CC4)N5CCN(CC5)C)OC	Chemogenomic candidate	10	12	human fibroblast	2	-0.989169	110	0.536364	0.463636	1	0.215686	0.72549	0.0588235	0	0.181818	0	0.181818	84.3333	0.520833	0.311795	0.58592	0.102285	0.479167	0.125354	0.149616	0.0949875	7.64557e+11	tag Hoechst High Intensity, tag healthy nuclei < 50 %
ASP3026	Multiplex	EUB0000688a	CC(C)S(=O)(=O)C1=CC=CC=C1NC2=NC(=NC=N2)NC3=C(C=C(C=C3)N4CCC(CC4)N5CCN(CC5)C)OC	Chemogenomic candidate	10	0	human fibroblast	2	0	95	0.505263	0.494737	0.555556	0.212766	0.595745	0.191489	0.444444	0.1	0.1	0	99.3333	0.557903	0.293865	0.595118	0.111016	0.442097	0.112114	0.290215	0.0427216	#DIV/0!	tag Hoechst High Intensity, tag healthy nuclei < 50 %
ASP3026	Multiplex	EUB0000688a	CC(C)S(=O)(=O)C1=CC=CC=C1NC2=NC(=NC=N2)NC3=C(C=C(C=C3)N4CCC(CC4)N5CCN(CC5)C)OC	Chemogenomic candidate	10	12	U2OS	2	-0.045371	108	0.148148	0.851852	0.428571	0.76087	0.163043	0.076087	0.571429	0.842857	0.242857	0.4	139.167	0.248909	0.881032	0.0702926	0.0486752	0.751091	0.279715	0.240817	0.0972624	1.01342	tag tubulin effect > 50 %
ASP3026	Multiplex	EUB0000688a	CC(C)S(=O)(=O)C1=CC=CC=C1NC2=NC(=NC=N2)NC3=C(C=C(C=C3)N4CCC(CC4)N5CCN(CC5)C)OC	Chemogenomic candidate	10	24	U2OS	2	-0.0950881	95	0.136842	0.863158	1	0.792683	0.109756	0.097561	0	0.646154	0.415385	0.353846	178.5	0.310463	0.888541	0.0624047	0.049054	0.689537	0.288716	0.291394	0.0647451	1.00514	tag tubulin effect > 50 %
ASP3026	Multiplex	EUB0000688a	CC(C)S(=O)(=O)C1=CC=CC=C1NC2=NC(=NC=N2)NC3=C(C=C(C=C3)N4CCC(CC4)N5CCN(CC5)C)OC	Chemogenomic candidate	10	12	U2OS	1	-0.189401	178	0.0674157	0.932584	0.5	0.807229	0.0722892	0.120482	0.5	0.791045	0.164179	0.268657	199.167	0.369403	0.889153	0.0559111	0.0549359	0.630597	0.260916	0.219385	0.107163	1.00798	tag tubulin effect > 50 %
ASP3026	Multiplex	EUB0000688a	CC(C)S(=O)(=O)C1=CC=CC=C1NC2=NC(=NC=N2)NC3=C(C=C(C=C3)N4CCC(CC4)N5CCN(CC5)C)OC	Chemogenomic candidate	10	24	U2OS	1	-0.0984047	175	0.0742857	0.925714	0.7	0.814815	0.0617284	0.123457	0.3	0.522727	0.242424	0.189394	276.667	0.370298	0.917275	0.0423433	0.0403816	0.629702	0.31212	0.21103	0.0682442	1.0014	tag tubulin effect > 50 %
ASP3026	Multiplex	EUB0000688a	CC(C)S(=O)(=O)C1=CC=CC=C1NC2=NC(=NC=N2)NC3=C(C=C(C=C3)N4CCC(CC4)N5CCN(CC5)C)OC	Chemogenomic candidate	10	12	HEK293T	2	-0.452021	809	0.123609	0.876391	0.19375	0.747532	0.0267983	0.22567	0.80625	0.89434	0.658491	0.0584906	1765.83	0.0828653	0.866876	0.0909282	0.0421957	0.917135	0.0464362	0.0760075	0.0151675	0.999314	tag tubulin effect > 50 %, tag mitochondrial mass > 50 %
ASP3026	Multiplex	EUB0000688a	CC(C)S(=O)(=O)C1=CC=CC=C1NC2=NC(=NC=N2)NC3=C(C=C(C=C3)N4CCC(CC4)N5CCN(CC5)C)OC	Chemogenomic candidate	10	24	HEK293T	2	-0.384684	797	0.134253	0.865747	0.138614	0.67971	0.0275362	0.292754	0.861386	0.897655	0.513859	0.0575693	3025.33	0.160951	0.737455	0.183731	0.0788139	0.839049	0.452063	0.229554	0.0699568	0.474195	tag tubulin effect > 50 %, tag mitochondrial mass > 50 %
ASP3026	Multiplex	EUB0000688a	CC(C)S(=O)(=O)C1=CC=CC=C1NC2=NC(=NC=N2)NC3=C(C=C(C=C3)N4CCC(CC4)N5CCN(CC5)C)OC	Chemogenomic candidate	10	12	U2OS	1	0.583159	198	0.030303	0.969697	0.466667	0.854167	0.0677083	0.078125	0.533333	0.152439	0.152439	0.207317	199.167	0.369403	0.889153	0.0559111	0.0549359	0.630597	0.260916	0.219385	0.107163	1.00798
ASP3026	Multiplex	EUB0000688a	CC(C)S(=O)(=O)C1=CC=CC=C1NC2=NC(=NC=N2)NC3=C(C=C(C=C3)N4CCC(CC4)N5CCN(CC5)C)OC	Chemogenomic candidate	10	24	U2OS	1	0.497335	244	0.0204918	0.979508	0.521739	0.832636	0.0711297	0.0962343	0.478261	0.105528	0.130653	0.180905	276.667	0.370298	0.917275	0.0423433	0.0403816	0.629702	0.31212	0.21103	0.0682442	1.0014
ASP3026	Multiplex	EUB0000688a	CC(C)S(=O)(=O)C1=CC=CC=C1NC2=NC(=NC=N2)NC3=C(C=C(C=C3)N4CCC(CC4)N5CCN(CC5)C)OC	Chemogenomic candidate	10	12	U2OS	2	0.730447	144	0.118056	0.881944	0.25	0.834646	0.102362	0.0629921	0.75	0.169811	0.188679	0.169811	139.167	0.248909	0.881032	0.0702926	0.0486752	0.751091	0.279715	0.240817	0.0972624	1.01342
ASP3026	Multiplex	EUB0000688a	CC(C)S(=O)(=O)C1=CC=CC=C1NC2=NC(=NC=N2)NC3=C(C=C(C=C3)N4CCC(CC4)N5CCN(CC5)C)OC	Chemogenomic candidate	10	24	human fibroblast	1	0.858839	260	0.184615	0.815385	0.791667	0.504717	0.382075	0.113208	0.208333	0.448598	0.0186916	0.158879	242.833	0.651394	0.612787	0.255064	0.132149	0.348606	0.025027	0.0173706	0.0467803	1.19614
ASP3026	Multiplex	EUB0000688a	CC(C)S(=O)(=O)C1=CC=CC=C1NC2=NC(=NC=N2)NC3=C(C=C(C=C3)N4CCC(CC4)N5CCN(CC5)C)OC	Chemogenomic candidate	10	24	U2OS	2	0.727537	152	0.0592105	0.940789	0.666667	0.93007	0.027972	0.041958	0.333333	0.18797	0.240602	0.150376	178.5	0.310463	0.888541	0.0624047	0.049054	0.689537	0.288716	0.291394	0.0647451	1.00514
ASP3026	Multiplex	EUB0000688a	CC(C)S(=O)(=O)C1=CC=CC=C1NC2=NC(=NC=N2)NC3=C(C=C(C=C3)N4CCC(CC4)N5CCN(CC5)C)OC	Chemogenomic candidate	10	24	HEK293T	1	0.894816	833	0.0720288	0.927971	0.107692	0.818887	0.0970246	0.084088	0.892308	0.129542	0.0315956	0.134281	838.25	0.154355	0.792279	0.137252	0.0704688	0.845645	0.0333863	0.0308318	0.0797788	1.0151
ASP3026	Multiplex	EUB0000688a	CC(C)S(=O)(=O)C1=CC=CC=C1NC2=NC(=NC=N2)NC3=C(C=C(C=C3)N4CCC(CC4)N5CCN(CC5)C)OC	Chemogenomic candidate	10	0	U2OS	1	0	167	0.0419162	0.958084	0.571429	0.8625	0.09375	0.04375	0.428571	0.23913	0.115942	0.123188	156.5	0.597808	0.882455	0.0611652	0.0563801	0.402192	0.271242	0.126392	0.10096	0
ASP3026	Multiplex	EUB0000688a	CC(C)S(=O)(=O)C1=CC=CC=C1NC2=NC(=NC=N2)NC3=C(C=C(C=C3)N4CCC(CC4)N5CCN(CC5)C)OC	Chemogenomic candidate	10	12	human fibroblast	1	2.64626	252	0.146825	0.853175	0.724138	0.55814	0.306977	0.134884	0.275862	0.5	0.0666667	0.116667	230.667	0.695283	0.596796	0.258529	0.144676	0.304717	0.0342007	0.0357415	0.0583164	1.23771
ASP3026	Multiplex	EUB0000688a	CC(C)S(=O)(=O)C1=CC=CC=C1NC2=NC(=NC=N2)NC3=C(C=C(C=C3)N4CCC(CC4)N5CCN(CC5)C)OC	Chemogenomic candidate	10	24	HEK293T	2	1.06229	2306	0.0277537	0.972246	0.0909091	0.773863	0.196699	0.029438	0.909091	0.174063	0.0207493	0.110663	3025.33	0.160951	0.737455	0.183731	0.0788139	0.839049	0.452063	0.229554	0.0699568	0.474195
ASP3026	Multiplex	EUB0000688a	CC(C)S(=O)(=O)C1=CC=CC=C1NC2=NC(=NC=N2)NC3=C(C=C(C=C3)N4CCC(CC4)N5CCN(CC5)C)OC	Chemogenomic candidate	10	12	human fibroblast	1	1.49354	249	0.184739	0.815261	0.666667	0.600985	0.236453	0.162562	0.333333	0.0737705	0.0737705	0.0901639	230.667	0.695283	0.596796	0.258529	0.144676	0.304717	0.0342007	0.0357415	0.0583164	1.23771
ASP3026	Multiplex	EUB0000688a	CC(C)S(=O)(=O)C1=CC=CC=C1NC2=NC(=NC=N2)NC3=C(C=C(C=C3)N4CCC(CC4)N5CCN(CC5)C)OC	Chemogenomic candidate	10	24	human fibroblast	1	2.09907	264	0.162879	0.837121	0.5	0.633484	0.221719	0.144796	0.5	0.0428571	0.0357143	0.0785714	242.833	0.651394	0.612787	0.255064	0.132149	0.348606	0.025027	0.0173706	0.0467803	1.19614
ASP3026	Multiplex	EUB0000688a	CC(C)S(=O)(=O)C1=CC=CC=C1NC2=NC(=NC=N2)NC3=C(C=C(C=C3)N4CCC(CC4)N5CCN(CC5)C)OC	Chemogenomic candidate	10	0	U2OS	1	0	174	0.0632184	0.936782	0.5	0.889571	0.0490798	0.0613497	0.5	0.241379	0.0758621	0.0758621	156.5	0.597808	0.882455	0.0611652	0.0563801	0.402192	0.271242	0.126392	0.10096	0
ASP3026	Multiplex	EUB0000688a	CC(C)S(=O)(=O)C1=CC=CC=C1NC2=NC(=NC=N2)NC3=C(C=C(C=C3)N4CCC(CC4)N5CCN(CC5)C)OC	Chemogenomic candidate	10	12	HEK293T	1	0.408169	674	0.0949555	0.905045	0.123077	0.663934	0.122951	0.213115	0.876923	0.0839506	0.0592593	0.0617284	691.5	0.185934	0.698273	0.149796	0.151931	0.814066	0.0267306	0.0412745	0.044192	1.10218
ASP3026	Multiplex	EUB0000688a	CC(C)S(=O)(=O)C1=CC=CC=C1NC2=NC(=NC=N2)NC3=C(C=C(C=C3)N4CCC(CC4)N5CCN(CC5)C)OC	Chemogenomic candidate	10	0	U2OS	2	0	101	0.178218	0.821782	0.25	0.915663	0.0361446	0.0481928	0.75	0.302632	0.0921053	0.0526316	99.3333	#DIV/0!	0.877466	0.0854137	0.0371199	#DIV/0!	0.27287	0.183282	0.0858335	0
ASP3026	Multiplex	EUB0000688a	CC(C)S(=O)(=O)C1=CC=CC=C1NC2=NC(=NC=N2)NC3=C(C=C(C=C3)N4CCC(CC4)N5CCN(CC5)C)OC	Chemogenomic candidate	10	0	HEK293T	1	0	756	0.150852	0.849148	0.126214	0.517192	0.187679	0.295129	0.873786	0.0166205	0.0941828	0.0443213	865.667	0.13691	0.491163	0.230041	0.278796	0.86309	0.0185405	0.129798	0.0320833	#DIV/0!
ASP3026	Multiplex	EUB0000688a	CC(C)S(=O)(=O)C1=CC=CC=C1NC2=NC(=NC=N2)NC3=C(C=C(C=C3)N4CCC(CC4)N5CCN(CC5)C)OC	Chemogenomic candidate	10	12	HEK293T	2	0.894118	1344	0.0245536	0.975446	0.103896	0.880244	0.0610221	0.0587338	0.896104	0.209705	0.12565	0.0381282	1765.83	0.0828653	0.866876	0.0909282	0.0421957	0.917135	0.0464362	0.0760075	0.0151675	0.999314
ASP3026	Multiplex	EUB0000688a	CC(C)S(=O)(=O)C1=CC=CC=C1NC2=NC(=NC=N2)NC3=C(C=C(C=C3)N4CCC(CC4)N5CCN(CC5)C)OC	Chemogenomic candidate	10	0	human fibroblast	1	0	226	0.0884956	0.911504	0.734694	0.529126	0.23301	0.237864	0.265306	0.0275229	0.137615	0.0366972	211.75	0.805591	0.539397	0.278942	0.181661	0.194409	0.021052	0.100182	0.0283348	#DIV/0!
ASP3026	Multiplex	EUB0000688a	CC(C)S(=O)(=O)C1=CC=CC=C1NC2=NC(=NC=N2)NC3=C(C=C(C=C3)N4CCC(CC4)N5CCN(CC5)C)OC	Chemogenomic candidate	10	0	U2OS	2	0	95	0.136842	0.863158	0.5	0.878049	0.097561	0.0243902	0.5	0.25	0.152778	0.0277778	99.3333	#DIV/0!	0.877466	0.0854137	0.0371199	#DIV/0!	0.27287	0.183282	0.0858335	0
ASP3026	Multiplex	EUB0000688a	CC(C)S(=O)(=O)C1=CC=CC=C1NC2=NC(=NC=N2)NC3=C(C=C(C=C3)N4CCC(CC4)N5CCN(CC5)C)OC	Chemogenomic candidate	10	0	human fibroblast	1	0	223	0.0717489	0.928251	0.820513	0.52657	0.285024	0.188406	0.179487	0.00917431	0.0458716	0.0183486	211.75	0.805591	0.539397	0.278942	0.181661	0.194409	0.021052	0.100182	0.0283348	#DIV/0!
ASP3026	Multiplex	EUB0000688a	CC(C)S(=O)(=O)C1=CC=CC=C1NC2=NC(=NC=N2)NC3=C(C=C(C=C3)N4CCC(CC4)N5CCN(CC5)C)OC	Chemogenomic candidate	10	0	HEK293T	1	0	802	0.185476	0.814524	0.156098	0.579518	0.173494	0.246988	0.843902	0.016632	0.153846	0.014553	865.667	0.13691	0.491163	0.230041	0.278796	0.86309	0.0185405	0.129798	0.0320833	#DIV/0!
ASP3026	Multiplex	EUB0000688a	CC(C)S(=O)(=O)C1=CC=CC=C1NC2=NC(=NC=N2)NC3=C(C=C(C=C3)N4CCC(CC4)N5CCN(CC5)C)OC	Chemogenomic candidate	10	0	HEK293T	2	0	900	0.0244444	0.975556	0.134969	0.751708	0.0626424	0.185649	0.865031	0	0.25303	0.00151515	1080.25	0.142406	0.776982	0.0533037	0.169714	0.857594	0.00453037	0.323128	0.00113292	#DIV/0!
ASP3026	Multiplex	EUB0000688a	CC(C)S(=O)(=O)C1=CC=CC=C1NC2=NC(=NC=N2)NC3=C(C=C(C=C3)N4CCC(CC4)N5CCN(CC5)C)OC	Chemogenomic candidate	10	0	HEK293T	2	0	1160	0.0215517	0.978448	0.15	0.790308	0.0511013	0.15859	0.85	0.00111483	0.335563	0	1080.25	0.142406	0.776982	0.0533037	0.169714	0.857594	0.00453037	0.323128	0.00113292	#DIV/0!
AST-1306 (tosylate)	Multiplex	EUB0000616aPTSA	CC1=CC=C(C=C1)S(=O)(=O)O.C=CC(=O)NC1=CC2=C(C=C1)N=CN=C2NC3=CC(=C(C=C3)OCC4=CC(=CC=C4)F)Cl	Chemogenomic candidate	10	24	human fibroblast	1	0.216059	118	0.0847458	0.915254	0.612903	0.398148	0.314815	0.287037	0.387097	0.488372	0.0930233	0.372093	106.75	0.494315	0.513538	0.210808	0.275654	0.505685	0.339408	0.0326339	0.298699	1.11839	tag healthy nuclei < 50 %
AST-1306 (tosylate)	Multiplex	EUB0000616aPTSA	CC1=CC=C(C=C1)S(=O)(=O)O.C=CC(=O)NC1=CC2=C(C=C1)N=CN=C2NC3=CC(=C(C=C3)OCC4=CC(=CC=C4)F)Cl	Chemogenomic candidate	1	24	human fibroblast	1	0.614924	123	0.097561	0.902439	0.657143	0.423423	0.261261	0.315315	0.342857	0.404255	0.0212766	0.319149	106.75	0.494315	0.513538	0.210808	0.275654	0.505685	0.339408	0.0326339	0.298699	1.11839	tag healthy nuclei < 50 %
AST-1306 (tosylate)	Multiplex	EUB0000616aPTSA	CC1=CC=C(C=C1)S(=O)(=O)O.C=CC(=O)NC1=CC2=C(C=C1)N=CN=C2NC3=CC(=C(C=C3)OCC4=CC(=CC=C4)F)Cl	Chemogenomic candidate	1	12	human fibroblast	1	0.477375	120	0.075	0.925	0.536585	0.378378	0.252252	0.369369	0.463415	0.261905	0.0952381	0.285714	107.083	0.631736	0.44459	0.220734	0.334676	0.368264	0.315502	0.0769574	0.274792	1.29875	tag healthy nuclei < 50 %
AST-1306 (tosylate)	Multiplex	EUB0000616aPTSA	CC1=CC=C(C=C1)S(=O)(=O)O.C=CC(=O)NC1=CC2=C(C=C1)N=CN=C2NC3=CC(=C(C=C3)OCC4=CC(=CC=C4)F)Cl	Chemogenomic candidate	1	48	human fibroblast	1	0.671374	112	0.0803571	0.919643	0.647059	0.485437	0.349515	0.165049	0.352941	0.26	0	0.28	110.667	0.531499	0.514801	0.276708	0.208491	0.468501	0.298464	0.0241518	0.276892	5.201	tag healthy nuclei < 50 %
AST-1306 (tosylate)	Multiplex	EUB0000616aPTSA	CC1=CC=C(C=C1)S(=O)(=O)O.C=CC(=O)NC1=CC2=C(C=C1)N=CN=C2NC3=CC(=C(C=C3)OCC4=CC(=CC=C4)F)Cl	Chemogenomic candidate	10	12	human fibroblast	1	0.0810721	122	0.155738	0.844262	0.771429	0.38835	0.271845	0.339806	0.228571	0.275	0.075	0.15	107.083	0.631736	0.44459	0.220734	0.334676	0.368264	0.315502	0.0769574	0.274792	1.29875	tag healthy nuclei < 50 %
AST-1306 (tosylate)	Multiplex	EUB0000616aPTSA	CC1=CC=C(C=C1)S(=O)(=O)O.C=CC(=O)NC1=CC2=C(C=C1)N=CN=C2NC3=CC(=C(C=C3)OCC4=CC(=CC=C4)F)Cl	Chemogenomic candidate	1	0	human fibroblast	1	0	153	0.143791	0.856209	0.714286	0.282443	0.396947	0.320611	0.285714	0.324324	0.324324	0.108108	125.417	0.662404	0.310276	0.328567	0.361157	0.337596	0.203306	0.230525	0.0840641	#DIV/0!	tag healthy nuclei < 50 %
AST-1306 (tosylate)	Multiplex	EUB0000616aPTSA	CC1=CC=C(C=C1)S(=O)(=O)O.C=CC(=O)NC1=CC2=C(C=C1)N=CN=C2NC3=CC(=C(C=C3)OCC4=CC(=CC=C4)F)Cl	Chemogenomic candidate	1	12	HEK293T	2	0.667392	226	0.0221239	0.977876	0.114286	0.457014	0.0678733	0.475113	0.885714	0.247525	0.267327	0.0594059	256.75	0.112092	0.454373	0.0637918	0.481836	0.887908	0.182057	0.132768	0.0724535	1.03765	tag healthy nuclei < 50 %
AST-1306 (tosylate)	Multiplex	EUB0000616aPTSA	CC1=CC=C(C=C1)S(=O)(=O)O.C=CC(=O)NC1=CC2=C(C=C1)N=CN=C2NC3=CC(=C(C=C3)OCC4=CC(=CC=C4)F)Cl	Chemogenomic candidate	10	48	HEK293T	1	1.55527	339	0.123894	0.876106	0.519231	0.481481	0.16835	0.350168	0.480769	0.384615	0.468531	0.0559441	351.333	0.392717	0.429172	0.195155	0.375673	0.607283	0.266274	0.27356	0.0493784	0.987254	tag healthy nuclei < 50 %
AST-1306 (tosylate)	Multiplex	EUB0000616aPTSA	CC1=CC=C(C=C1)S(=O)(=O)O.C=CC(=O)NC1=CC2=C(C=C1)N=CN=C2NC3=CC(=C(C=C3)OCC4=CC(=CC=C4)F)Cl	Chemogenomic candidate	10	0	human fibroblast	1	0	144	0.166667	0.833333	0.756098	0.325	0.333333	0.341667	0.243902	0.333333	0.230769	0.0512821	125.417	0.662404	0.310276	0.328567	0.361157	0.337596	0.203306	0.230525	0.0840641	#DIV/0!	tag healthy nuclei < 50 %
AST-1306 (tosylate)	Multiplex	EUB0000616aPTSA	CC1=CC=C(C=C1)S(=O)(=O)O.C=CC(=O)NC1=CC2=C(C=C1)N=CN=C2NC3=CC(=C(C=C3)OCC4=CC(=CC=C4)F)Cl	Chemogenomic candidate	1	48	HEK293T	1	1.33964	430	0.134884	0.865116	0.442857	0.473118	0.150538	0.376344	0.557143	0.329545	0.323864	0.0454545	351.333	0.392717	0.429172	0.195155	0.375673	0.607283	0.266274	0.27356	0.0493784	0.987254	tag healthy nuclei < 50 %
AST-1306 (tosylate)	Multiplex	EUB0000616aPTSA	CC1=CC=C(C=C1)S(=O)(=O)O.C=CC(=O)NC1=CC2=C(C=C1)N=CN=C2NC3=CC(=C(C=C3)OCC4=CC(=CC=C4)F)Cl	Chemogenomic candidate	1	0	HEK293T	2	0	225	0.0577778	0.942222	0.115942	0.273585	0.0754717	0.650943	0.884058	0.0517241	0.172414	0.0344828	233.167	0.0929753	0.24237	0.0798532	0.677777	0.907025	0.0412417	0.171457	0.0110984	#DIV/0!	tag healthy nuclei < 50 %
AST-1306 (tosylate)	Multiplex	EUB0000616aPTSA	CC1=CC=C(C=C1)S(=O)(=O)O.C=CC(=O)NC1=CC2=C(C=C1)N=CN=C2NC3=CC(=C(C=C3)OCC4=CC(=CC=C4)F)Cl	Chemogenomic candidate	10	24	HEK293T	2	0.0241321	161	0.0993789	0.900621	0.486842	0.303448	0.172414	0.524138	0.513158	0.454545	0.5	0.0227273	322.417	0.125402	0.652444	0.053119	0.294437	0.874598	0.274867	0.112063	0.0970907	1.01358	tag healthy nuclei < 50 %
AST-1306 (tosylate)	Multiplex	EUB0000616aPTSA	CC1=CC=C(C=C1)S(=O)(=O)O.C=CC(=O)NC1=CC2=C(C=C1)N=CN=C2NC3=CC(=C(C=C3)OCC4=CC(=CC=C4)F)Cl	Chemogenomic candidate	10	12	HEK293T	2	-0.132452	184	0.0869565	0.913043	0.494737	0.214286	0.220238	0.565476	0.505263	0.277778	0.277778	0	256.75	0.112092	0.454373	0.0637918	0.481836	0.887908	0.182057	0.132768	0.0724535	1.03765	tag healthy nuclei < 50 %
AST-1306 (tosylate)	Multiplex	EUB0000616aPTSA	CC1=CC=C(C=C1)S(=O)(=O)O.C=CC(=O)NC1=CC2=C(C=C1)N=CN=C2NC3=CC(=C(C=C3)OCC4=CC(=CC=C4)F)Cl	Chemogenomic candidate	10	0	HEK293T	2	0	162	0.0493827	0.950617	0.076087	0.272727	0.12987	0.597403	0.923913	0	0.047619	0	233.167	0.0929753	0.24237	0.0798532	0.677777	0.907025	0.0412417	0.171457	0.0110984	#DIV/0!	tag healthy nuclei < 50 %
AST-1306 (tosylate)	Multiplex	EUB0000616aPTSA	CC1=CC=C(C=C1)S(=O)(=O)O.C=CC(=O)NC1=CC2=C(C=C1)N=CN=C2NC3=CC(=C(C=C3)OCC4=CC(=CC=C4)F)Cl	Chemogenomic candidate	1	12	HEK293T	1	0.669552	304	0.118421	0.881579	0.526316	0.384328	0.119403	0.496269	0.473684	0.398058	0.757282	0.0582524	274.667	0.427177	0.372026	0.131275	0.496699	0.572823	0.324854	0.687273	0.0469186	1.209	tag healthy nuclei < 50 %, tag mitochondrial mass > 50 %
AST-1306 (tosylate)	Multiplex	EUB0000616aPTSA	CC1=CC=C(C=C1)S(=O)(=O)O.C=CC(=O)NC1=CC2=C(C=C1)N=CN=C2NC3=CC(=C(C=C3)OCC4=CC(=CC=C4)F)Cl	Chemogenomic candidate	1	24	HEK293T	1	0.824665	351	0.153846	0.846154	0.457143	0.414141	0.114478	0.47138	0.542857	0.398374	0.617886	0.0325203	293.167	0.429543	0.395461	0.147538	0.457001	0.570457	0.312274	0.510446	0.0420248	1.14297	tag healthy nuclei < 50 %, tag mitochondrial mass > 50 %
AST-1306 (tosylate)	Multiplex	EUB0000616aPTSA	CC1=CC=C(C=C1)S(=O)(=O)O.C=CC(=O)NC1=CC2=C(C=C1)N=CN=C2NC3=CC(=C(C=C3)OCC4=CC(=CC=C4)F)Cl	Chemogenomic candidate	10	12	HEK293T	1	1.95491	267	0.123596	0.876404	0.512397	0.380342	0.102564	0.517094	0.487603	0.449438	0.820225	0.0224719	274.667	0.427177	0.372026	0.131275	0.496699	0.572823	0.324854	0.687273	0.0469186	1.209	tag healthy nuclei < 50 %, tag mitochondrial mass > 50 %
AST-1306 (tosylate)	Multiplex	EUB0000616aPTSA	CC1=CC=C(C=C1)S(=O)(=O)O.C=CC(=O)NC1=CC2=C(C=C1)N=CN=C2NC3=CC(=C(C=C3)OCC4=CC(=CC=C4)F)Cl	Chemogenomic candidate	10	24	HEK293T	1	1.46445	262	0.164122	0.835878	0.567308	0.410959	0.114155	0.474886	0.432692	0.488889	0.788889	0.0222222	293.167	0.429543	0.395461	0.147538	0.457001	0.570457	0.312274	0.510446	0.0420248	1.14297	tag healthy nuclei < 50 %, tag mitochondrial mass > 50 %
AST-1306 (tosylate)	Multiplex	EUB0000616aPTSA	CC1=CC=C(C=C1)S(=O)(=O)O.C=CC(=O)NC1=CC2=C(C=C1)N=CN=C2NC3=CC(=C(C=C3)OCC4=CC(=CC=C4)F)Cl	Chemogenomic candidate	1	0	HEK293T	1	0	318	0.0974843	0.902516	0.303922	0.236934	0.0522648	0.710801	0.696078	0.0294118	0.838235	0.0147059	256.5	0.333294	0.212413	0.0958204	0.691766	0.666706	0.0141172	0.774309	0.00115741	#DIV/0!	tag healthy nuclei < 50 %, tag mitochondrial mass > 50 %
AST-1306 (tosylate)	Multiplex	EUB0000616aPTSA	CC1=CC=C(C=C1)S(=O)(=O)O.C=CC(=O)NC1=CC2=C(C=C1)N=CN=C2NC3=CC(=C(C=C3)OCC4=CC(=CC=C4)F)Cl	Chemogenomic candidate	10	0	HEK293T	1	0	249	0.11245	0.88755	0.272152	0.167421	0.117647	0.714932	0.727848	0.027027	0.837838	0	256.5	0.333294	0.212413	0.0958204	0.691766	0.666706	0.0141172	0.774309	0.00115741	#DIV/0!	tag healthy nuclei < 50 %, tag mitochondrial mass > 50 %
AST-1306 (tosylate)	Multiplex	EUB0000616aPTSA	CC1=CC=C(C=C1)S(=O)(=O)O.C=CC(=O)NC1=CC2=C(C=C1)N=CN=C2NC3=CC(=C(C=C3)OCC4=CC(=CC=C4)F)Cl	Chemogenomic candidate	1	48	human fibroblast	2	0.219957	106	0.141509	0.858491	0.5	0.659341	0.318681	0.021978	0.5	0.416667	0.0833333	0.183333	108	0.498611	0.755765	0.214424	0.0298114	0.501389	0.304063	0.0278827	0.153127	1.11404
AST-1306 (tosylate)	Multiplex	EUB0000616aPTSA	CC1=CC=C(C=C1)S(=O)(=O)O.C=CC(=O)NC1=CC2=C(C=C1)N=CN=C2NC3=CC(=C(C=C3)OCC4=CC(=CC=C4)F)Cl	Chemogenomic candidate	10	48	U2OS	2	0.430618	97	0.0515464	0.948454	0.666667	0.793478	0.141304	0.0652174	0.333333	0.356164	0.219178	0.178082	153.583	0.433939	0.864953	0.0805245	0.0545227	0.566061	0.197701	0.115167	0.0429551	1.00576
AST-1306 (tosylate)	Multiplex	EUB0000616aPTSA	CC1=CC=C(C=C1)S(=O)(=O)O.C=CC(=O)NC1=CC2=C(C=C1)N=CN=C2NC3=CC(=C(C=C3)OCC4=CC(=CC=C4)F)Cl	Chemogenomic candidate	10	48	human fibroblast	1	-0.734973	154	0.188312	0.811688	0.818182	0.504	0.408	0.088	0.181818	0.492063	0.0952381	0.174603	110.667	0.531499	0.514801	0.276708	0.208491	0.468501	0.298464	0.0241518	0.276892	5.201
AST-1306 (tosylate)	Multiplex	EUB0000616aPTSA	CC1=CC=C(C=C1)S(=O)(=O)O.C=CC(=O)NC1=CC2=C(C=C1)N=CN=C2NC3=CC(=C(C=C3)OCC4=CC(=CC=C4)F)Cl	Chemogenomic candidate	1	0	human fibroblast	2	0	127	0.19685	0.80315	0.6	0.54902	0.352941	0.0980392	0.4	0.178571	0.178571	0.160714	101.167	0.681754	0.642258	0.240072	0.11767	0.318246	0.20189	0.247166	0.0567674	#DIV/0!
AST-1306 (tosylate)	Multiplex	EUB0000616aPTSA	CC1=CC=C(C=C1)S(=O)(=O)O.C=CC(=O)NC1=CC2=C(C=C1)N=CN=C2NC3=CC(=C(C=C3)OCC4=CC(=CC=C4)F)Cl	Chemogenomic candidate	10	24	U2OS	2	0.146031	77	0.0649351	0.935065	0.538462	0.694444	0.125	0.180556	0.461538	0.32	0.24	0.14	102.167	0.521098	0.831195	0.0931875	0.0756178	0.478902	0.166245	0.0748286	0.0347485	1.01542
AST-1306 (tosylate)	Multiplex	EUB0000616aPTSA	CC1=CC=C(C=C1)S(=O)(=O)O.C=CC(=O)NC1=CC2=C(C=C1)N=CN=C2NC3=CC(=C(C=C3)OCC4=CC(=CC=C4)F)Cl	Chemogenomic candidate	10	24	human fibroblast	2	0.146031	77	0.0649351	0.935065	0.538462	0.694444	0.125	0.180556	0.461538	0.32	0.24	0.14	108.083	0.521098	0.831195	0.0931875	0.0756178	0.478902	0.166245	0.0748286	0.0347485	1.01542
AST-1306 (tosylate)	Multiplex	EUB0000616aPTSA	CC1=CC=C(C=C1)S(=O)(=O)O.C=CC(=O)NC1=CC2=C(C=C1)N=CN=C2NC3=CC(=C(C=C3)OCC4=CC(=CC=C4)F)Cl	Chemogenomic candidate	10	48	human fibroblast	2	0.833094	86	0.116279	0.883721	1	0.763158	0.223684	0.0131579	0	0.0689655	0.0344828	0.12069	108	0.498611	0.755765	0.214424	0.0298114	0.501389	0.304063	0.0278827	0.153127	1.11404
AST-1306 (tosylate)	Multiplex	EUB0000616aPTSA	CC1=CC=C(C=C1)S(=O)(=O)O.C=CC(=O)NC1=CC2=C(C=C1)N=CN=C2NC3=CC(=C(C=C3)OCC4=CC(=CC=C4)F)Cl	Chemogenomic candidate	10	48	U2OS	1	0.58876	240	0.0625	0.9375	0.738095	0.635556	0.177778	0.186667	0.261905	0.0839161	0.146853	0.118881	330	0.352767	0.881662	0.0538695	0.0644681	0.647233	0.102719	0.0952982	0.0225671	1.00252
AST-1306 (tosylate)	Multiplex	EUB0000616aPTSA	CC1=CC=C(C=C1)S(=O)(=O)O.C=CC(=O)NC1=CC2=C(C=C1)N=CN=C2NC3=CC(=C(C=C3)OCC4=CC(=CC=C4)F)Cl	Chemogenomic candidate	1	48	HEK293T	2	0.864091	512	0.0273438	0.972656	0.04	0.833333	0.0662651	0.100402	0.96	0.238554	0.0481928	0.115663	594.833	0.0998693	0.826482	0.0664568	0.107061	0.900131	0.232673	0.0431769	0.0808889	1.00265
AST-1306 (tosylate)	Multiplex	EUB0000616aPTSA	CC1=CC=C(C=C1)S(=O)(=O)O.C=CC(=O)NC1=CC2=C(C=C1)N=CN=C2NC3=CC(=C(C=C3)OCC4=CC(=CC=C4)F)Cl	Chemogenomic candidate	1	12	U2OS	1	0.363581	201	0.039801	0.960199	0.393939	0.658031	0.170984	0.170984	0.606061	0.0866142	0.110236	0.110236	165.75	0.37331	0.780206	0.114105	0.10569	0.62669	0.0951184	0.0845665	0.073208	1.05123
AST-1306 (tosylate)	Multiplex	EUB0000616aPTSA	CC1=CC=C(C=C1)S(=O)(=O)O.C=CC(=O)NC1=CC2=C(C=C1)N=CN=C2NC3=CC(=C(C=C3)OCC4=CC(=CC=C4)F)Cl	Chemogenomic candidate	1	24	HEK293T	2	0.750984	279	0.0250896	0.97491	0.166667	0.636029	0.0772059	0.286765	0.833333	0.300578	0.190751	0.104046	322.417	0.125402	0.652444	0.053119	0.294437	0.874598	0.274867	0.112063	0.0970907	1.01358
AST-1306 (tosylate)	Multiplex	EUB0000616aPTSA	CC1=CC=C(C=C1)S(=O)(=O)O.C=CC(=O)NC1=CC2=C(C=C1)N=CN=C2NC3=CC(=C(C=C3)OCC4=CC(=CC=C4)F)Cl	Chemogenomic candidate	10	48	HEK293T	2	0.268282	187	0.106952	0.893048	0.6	0.532934	0.137725	0.329341	0.4	0.460674	0.224719	0.0898876	594.833	0.0998693	0.826482	0.0664568	0.107061	0.900131	0.232673	0.0431769	0.0808889	1.00265
AST-1306 (tosylate)	Multiplex	EUB0000616aPTSA	CC1=CC=C(C=C1)S(=O)(=O)O.C=CC(=O)NC1=CC2=C(C=C1)N=CN=C2NC3=CC(=C(C=C3)OCC4=CC(=CC=C4)F)Cl	Chemogenomic candidate	10	24	U2OS	1	0.352915	206	0.0873786	0.912621	0.571429	0.728723	0.12234	0.148936	0.428571	0.10219	0.109489	0.0875912	212.417	0.319581	0.825187	0.0885786	0.0862345	0.680419	0.098522	0.0722682	0.0503222	0.99162
AST-1306 (tosylate)	Multiplex	EUB0000616aPTSA	CC1=CC=C(C=C1)S(=O)(=O)O.C=CC(=O)NC1=CC2=C(C=C1)N=CN=C2NC3=CC(=C(C=C3)OCC4=CC(=CC=C4)F)Cl	Chemogenomic candidate	10	0	U2OS	2	0	70	0.171429	0.828571	0.25	0.793103	0.0689655	0.137931	0.75	0.195652	0.217391	0.0869565	70.3333	0.262184	0.811025	0.0807672	0.108207	0.737816	0.0985605	0.153729	0.0272522	0
AST-1306 (tosylate)	Multiplex	EUB0000616aPTSA	CC1=CC=C(C=C1)S(=O)(=O)O.C=CC(=O)NC1=CC2=C(C=C1)N=CN=C2NC3=CC(=C(C=C3)OCC4=CC(=CC=C4)F)Cl	Chemogenomic candidate	1	0	U2OS	1	0	188	0.0531915	0.946809	0.428571	0.651685	0.151685	0.196629	0.571429	0.12931	0.25	0.0862069	152.167	0.315784	0.706662	0.13121	0.162128	0.684216	0.118789	0.261243	0.0625529	0
AST-1306 (tosylate)	Multiplex	EUB0000616aPTSA	CC1=CC=C(C=C1)S(=O)(=O)O.C=CC(=O)NC1=CC2=C(C=C1)N=CN=C2NC3=CC(=C(C=C3)OCC4=CC(=CC=C4)F)Cl	Chemogenomic candidate	10	0	U2OS	1	0	167	0.0718563	0.928144	0.37931	0.703226	0.109677	0.187097	0.62069	0.100917	0.256881	0.0825688	152.167	0.315784	0.706662	0.13121	0.162128	0.684216	0.118789	0.261243	0.0625529	0
AST-1306 (tosylate)	Multiplex	EUB0000616aPTSA	CC1=CC=C(C=C1)S(=O)(=O)O.C=CC(=O)NC1=CC2=C(C=C1)N=CN=C2NC3=CC(=C(C=C3)OCC4=CC(=CC=C4)F)Cl	Chemogenomic candidate	10	12	U2OS	1	0.165936	175	0.0685714	0.931429	0.36	0.699387	0.147239	0.153374	0.64	0.131579	0.114035	0.0614035	165.75	0.37331	0.780206	0.114105	0.10569	0.62669	0.0951184	0.0845665	0.073208	1.05123
AST-1306 (tosylate)	Multiplex	EUB0000616aPTSA	CC1=CC=C(C=C1)S(=O)(=O)O.C=CC(=O)NC1=CC2=C(C=C1)N=CN=C2NC3=CC(=C(C=C3)OCC4=CC(=CC=C4)F)Cl	Chemogenomic candidate	1	48	U2OS	1	0.839094	299	0.0468227	0.953177	0.628571	0.764912	0.112281	0.122807	0.371429	0.0733945	0.110092	0.0550459	330	0.352767	0.881662	0.0538695	0.0644681	0.647233	0.102719	0.0952982	0.0225671	1.00252
AST-1306 (tosylate)	Multiplex	EUB0000616aPTSA	CC1=CC=C(C=C1)S(=O)(=O)O.C=CC(=O)NC1=CC2=C(C=C1)N=CN=C2NC3=CC(=C(C=C3)OCC4=CC(=CC=C4)F)Cl	Chemogenomic candidate	1	24	U2OS	1	0.492007	223	0.058296	0.941704	0.6	0.747619	0.133333	0.119048	0.4	0.0636943	0.089172	0.044586	212.417	0.319581	0.825187	0.0885786	0.0862345	0.680419	0.098522	0.0722682	0.0503222	0.99162
AST-1306 (tosylate)	Multiplex	EUB0000616aPTSA	CC1=CC=C(C=C1)S(=O)(=O)O.C=CC(=O)NC1=CC2=C(C=C1)N=CN=C2NC3=CC(=C(C=C3)OCC4=CC(=CC=C4)F)Cl	Chemogenomic candidate	10	12	U2OS	2	0.334851	69	0.101449	0.898551	0.75	0.790323	0.145161	0.0645161	0.25	0.163265	0.22449	0.0408163	78.3333	0.502249	0.830741	0.0963907	0.0728682	0.497751	0.154861	0.0827165	0.0293447	1.11609
AST-1306 (tosylate)	Multiplex	EUB0000616aPTSA	CC1=CC=C(C=C1)S(=O)(=O)O.C=CC(=O)NC1=CC2=C(C=C1)N=CN=C2NC3=CC(=C(C=C3)OCC4=CC(=CC=C4)F)Cl	Chemogenomic candidate	10	12	human fibroblast	2	0.334851	69	0.101449	0.898551	0.75	0.790323	0.145161	0.0645161	0.25	0.163265	0.22449	0.0408163	106.333	0.502249	0.830741	0.0963907	0.0728682	0.497751	0.154861	0.0827165	0.0293447	1.11609
AST-1306 (tosylate)	Multiplex	EUB0000616aPTSA	CC1=CC=C(C=C1)S(=O)(=O)O.C=CC(=O)NC1=CC2=C(C=C1)N=CN=C2NC3=CC(=C(C=C3)OCC4=CC(=CC=C4)F)Cl	Chemogenomic candidate	1	12	U2OS	2	1.93212	77	0.0519481	0.948052	0.5	0.849315	0.0684932	0.0821918	0.5	0.290323	0.0967742	0.0322581	78.3333	0.502249	0.830741	0.0963907	0.0728682	0.497751	0.154861	0.0827165	0.0293447	1.11609
AST-1306 (tosylate)	Multiplex	EUB0000616aPTSA	CC1=CC=C(C=C1)S(=O)(=O)O.C=CC(=O)NC1=CC2=C(C=C1)N=CN=C2NC3=CC(=C(C=C3)OCC4=CC(=CC=C4)F)Cl	Chemogenomic candidate	1	12	human fibroblast	2	1.93212	77	0.0519481	0.948052	0.5	0.849315	0.0684932	0.0821918	0.5	0.290323	0.0967742	0.0322581	106.333	0.502249	0.830741	0.0963907	0.0728682	0.497751	0.154861	0.0827165	0.0293447	1.11609
AST-1306 (tosylate)	Multiplex	EUB0000616aPTSA	CC1=CC=C(C=C1)S(=O)(=O)O.C=CC(=O)NC1=CC2=C(C=C1)N=CN=C2NC3=CC(=C(C=C3)OCC4=CC(=CC=C4)F)Cl	Chemogenomic candidate	1	24	U2OS	2	0.875942	90	0.0555556	0.944444	0.555556	0.847059	0.0470588	0.105882	0.444444	0.333333	0.0833333	0.0277778	102.167	0.521098	0.831195	0.0931875	0.0756178	0.478902	0.166245	0.0748286	0.0347485	1.01542
AST-1306 (tosylate)	Multiplex	EUB0000616aPTSA	CC1=CC=C(C=C1)S(=O)(=O)O.C=CC(=O)NC1=CC2=C(C=C1)N=CN=C2NC3=CC(=C(C=C3)OCC4=CC(=CC=C4)F)Cl	Chemogenomic candidate	1	24	human fibroblast	2	0.875942	90	0.0555556	0.944444	0.555556	0.847059	0.0470588	0.105882	0.444444	0.333333	0.0833333	0.0277778	108.083	0.521098	0.831195	0.0931875	0.0756178	0.478902	0.166245	0.0748286	0.0347485	1.01542
AST-1306 (tosylate)	Multiplex	EUB0000616aPTSA	CC1=CC=C(C=C1)S(=O)(=O)O.C=CC(=O)NC1=CC2=C(C=C1)N=CN=C2NC3=CC(=C(C=C3)OCC4=CC(=CC=C4)F)Cl	Chemogenomic candidate	1	48	U2OS	2	0.872093	130	0.0615385	0.938462	0.333333	0.901639	0.0491803	0.0491803	0.666667	0.409091	0.163636	0.0272727	153.583	0.433939	0.864953	0.0805245	0.0545227	0.566061	0.197701	0.115167	0.0429551	1.00576
AST-1306 (tosylate)	Multiplex	EUB0000616aPTSA	CC1=CC=C(C=C1)S(=O)(=O)O.C=CC(=O)NC1=CC2=C(C=C1)N=CN=C2NC3=CC(=C(C=C3)OCC4=CC(=CC=C4)F)Cl	Chemogenomic candidate	1	0	U2OS	2	0	62	0.0483871	0.951613	0	0.830508	0.0169492	0.152542	1	0.163265	0.122449	0.0204082	70.3333	0.262184	0.811025	0.0807672	0.108207	0.737816	0.0985605	0.153729	0.0272522	0
AST-1306 (tosylate)	Multiplex	EUB0000616aPTSA	CC1=CC=C(C=C1)S(=O)(=O)O.C=CC(=O)NC1=CC2=C(C=C1)N=CN=C2NC3=CC(=C(C=C3)OCC4=CC(=CC=C4)F)Cl	Chemogenomic candidate	10	0	human fibroblast	2	0	83	0.0481928	0.951807	0.727273	0.594937	0.265823	0.139241	0.272727	0.0638298	0.170213	0	101.167	0.681754	0.642258	0.240072	0.11767	0.318246	0.20189	0.247166	0.0567674	#DIV/0!
AZD-7762	Multiplex	EUB0000180b	NC(=O)Nc1cc(-c2cccc(F)c2)sc1C(=O)N[C@H]1CCCNC1	Chemogenomic candidate	10	12	U2OS	2	-0.995167	79	0.0506329	0.949367	0.461538	0.253333	0.226667	0.52	0.538462	0.210526	0.315789	0.210526	78.3333	0.502249	0.830741	0.0963907	0.0728682	0.497751	0.154861	0.0827165	0.0293447	1.11609	tag healthy nuclei < 50 %
AZD-7762	Multiplex	EUB0000180b	NC(=O)Nc1cc(-c2cccc(F)c2)sc1C(=O)N[C@H]1CCCNC1	Chemogenomic candidate	10	12	human fibroblast	2	-0.995167	79	0.0506329	0.949367	0.461538	0.253333	0.226667	0.52	0.538462	0.210526	0.315789	0.210526	106.333	0.502249	0.830741	0.0963907	0.0728682	0.497751	0.154861	0.0827165	0.0293447	1.11609	tag healthy nuclei < 50 %
AZD-7762	Multiplex	EUB0000180b	NC(=O)Nc1cc(-c2cccc(F)c2)sc1C(=O)N[C@H]1CCCNC1	Chemogenomic candidate	10	12	U2OS	2	-0.785085	84	0.119048	0.880952	0.225806	0.324324	0.256757	0.418919	0.774194	0.0416667	0.0833333	0.208333	139.167	0.248909	0.881032	0.0702926	0.0486752	0.751091	0.279715	0.240817	0.0972624	1.01342	tag healthy nuclei < 50 %
AZD-7762	Multiplex	EUB0000180b	NC(=O)Nc1cc(-c2cccc(F)c2)sc1C(=O)N[C@H]1CCCNC1	Chemogenomic candidate	10	12	human fibroblast	2	-0.993279	110	0.327273	0.672727	0.444444	0.27027	0.608108	0.121622	0.555556	0.35	0	0.2	84.3333	0.520833	0.311795	0.58592	0.102285	0.479167	0.125354	0.149616	0.0949875	7.64557e+11	tag healthy nuclei < 50 %
AZD-7762	Multiplex	EUB0000180b	NC(=O)Nc1cc(-c2cccc(F)c2)sc1C(=O)N[C@H]1CCCNC1	Chemogenomic candidate	10	12	U2OS	1	-0.949784	189	0.031746	0.968254	0.255556	0.284153	0.224044	0.491803	0.744444	0.173077	0.153846	0.192308	199.167	0.369403	0.889153	0.0559111	0.0549359	0.630597	0.260916	0.219385	0.107163	1.00798	tag healthy nuclei < 50 %
AZD-7762	Multiplex	EUB0000180b	NC(=O)Nc1cc(-c2cccc(F)c2)sc1C(=O)N[C@H]1CCCNC1	Chemogenomic candidate	10	48	human fibroblast	1	-0.571947	162	0.314815	0.685185	0.25	0.369369	0.594595	0.036036	0.75	0.243902	0.0487805	0.170732	110.667	0.531499	0.514801	0.276708	0.208491	0.468501	0.298464	0.0241518	0.276892	5.201	tag healthy nuclei < 50 %
AZD-7762	Multiplex	EUB0000180b	NC(=O)Nc1cc(-c2cccc(F)c2)sc1C(=O)N[C@H]1CCCNC1	Chemogenomic candidate	10	48	human fibroblast	2	0.715123	126	0.134921	0.865079	1	0.376147	0.59633	0.0275229	0	0.146341	0.0243902	0.170732	108	0.498611	0.755765	0.214424	0.0298114	0.501389	0.304063	0.0278827	0.153127	1.11404	tag healthy nuclei < 50 %
AZD-7762	Multiplex	EUB0000180b	NC(=O)Nc1cc(-c2cccc(F)c2)sc1C(=O)N[C@H]1CCCNC1	Chemogenomic candidate	10	0	human fibroblast	2	0	77	0.337662	0.662338	0.428571	0.352941	0.509804	0.137255	0.571429	0.277778	0.277778	0.166667	99.3333	0.557903	0.293865	0.595118	0.111016	0.442097	0.112114	0.290215	0.0427216	#DIV/0!	tag healthy nuclei < 50 %
AZD-7762	Multiplex	EUB0000180b	NC(=O)Nc1cc(-c2cccc(F)c2)sc1C(=O)N[C@H]1CCCNC1	Chemogenomic candidate	1	12	human fibroblast	2	-0.99888	87	0.298851	0.701149	0.6	0.491803	0.42623	0.0819672	0.4	0.133333	0.0333333	0.166667	84.3333	0.520833	0.311795	0.58592	0.102285	0.479167	0.125354	0.149616	0.0949875	7.64557e+11	tag healthy nuclei < 50 %
AZD-7762	Multiplex	EUB0000180b	NC(=O)Nc1cc(-c2cccc(F)c2)sc1C(=O)N[C@H]1CCCNC1	Chemogenomic candidate	10	24	U2OS	1	-0.953313	185	0.0972973	0.902703	0.8125	0.0778443	0.443114	0.479042	0.1875	0.0769231	0.461538	0.153846	212.417	0.319581	0.825187	0.0885786	0.0862345	0.680419	0.098522	0.0722682	0.0503222	0.99162	tag healthy nuclei < 50 %
AZD-7762	Multiplex	EUB0000180b	NC(=O)Nc1cc(-c2cccc(F)c2)sc1C(=O)N[C@H]1CCCNC1	Chemogenomic candidate	10	24	human fibroblast	1	2.48064	129	0.27907	0.72093	0.375	0.44086	0.473118	0.0860215	0.625	0.268293	0.0487805	0.121951	106.75	0.494315	0.513538	0.210808	0.275654	0.505685	0.339408	0.0326339	0.298699	1.11839	tag healthy nuclei < 50 %
AZD-7762	Multiplex	EUB0000180b	NC(=O)Nc1cc(-c2cccc(F)c2)sc1C(=O)N[C@H]1CCCNC1	Chemogenomic candidate	10	24	HEK293T	2	-0.526529	175	0.0685714	0.931429	0.522727	0.0613497	0.128834	0.809816	0.477273	0.3	0.2	0.1	322.417	0.125402	0.652444	0.053119	0.294437	0.874598	0.274867	0.112063	0.0970907	1.01358	tag healthy nuclei < 50 %
AZD-7762	Multiplex	EUB0000180b	NC(=O)Nc1cc(-c2cccc(F)c2)sc1C(=O)N[C@H]1CCCNC1	Chemogenomic candidate	1	24	HEK293T	1	-0.362426	632	0.125	0.875	0.191589	0.424955	0.188065	0.38698	0.808411	0.144681	0.0723404	0.093617	838.25	0.154355	0.792279	0.137252	0.0704688	0.845645	0.0333863	0.0308318	0.0797788	1.0151	tag healthy nuclei < 50 %
AZD-7762	Multiplex	EUB0000180b	NC(=O)Nc1cc(-c2cccc(F)c2)sc1C(=O)N[C@H]1CCCNC1	Chemogenomic candidate	10	12	U2OS	1	-0.989368	194	0.128866	0.871134	0.435294	0.207101	0.289941	0.502959	0.564706	0.114286	0.2	0.0857143	165.75	0.37331	0.780206	0.114105	0.10569	0.62669	0.0951184	0.0845665	0.073208	1.05123	tag healthy nuclei < 50 %
AZD-7762	Multiplex	EUB0000180b	NC(=O)Nc1cc(-c2cccc(F)c2)sc1C(=O)N[C@H]1CCCNC1	Chemogenomic candidate	10	24	HEK293T	1	-0.391177	701	0.136947	0.863053	0.26009	0.408264	0.22314	0.368595	0.73991	0.368421	0.234818	0.0809717	838.25	0.154355	0.792279	0.137252	0.0704688	0.845645	0.0333863	0.0308318	0.0797788	1.0151	tag healthy nuclei < 50 %
AZD-7762	Multiplex	EUB0000180b	NC(=O)Nc1cc(-c2cccc(F)c2)sc1C(=O)N[C@H]1CCCNC1	Chemogenomic candidate	10	12	human fibroblast	1	1.87463	106	0.169811	0.830189	0.733333	0.352273	0.477273	0.170455	0.266667	0.225806	0.0322581	0.0645161	107.083	0.631736	0.44459	0.220734	0.334676	0.368264	0.315502	0.0769574	0.274792	1.29875	tag healthy nuclei < 50 %
AZD-7762	Multiplex	EUB0000180b	NC(=O)Nc1cc(-c2cccc(F)c2)sc1C(=O)N[C@H]1CCCNC1	Chemogenomic candidate	10	24	human fibroblast	1	0	316	0.148734	0.851266	0.827586	0.475836	0.416357	0.107807	0.172414	0.015625	0	0.0390625	242.833	0.651394	0.612787	0.255064	0.132149	0.348606	0.025027	0.0173706	0.0467803	1.19614	tag healthy nuclei < 50 %
AZD-7762	Multiplex	EUB0000180b	NC(=O)Nc1cc(-c2cccc(F)c2)sc1C(=O)N[C@H]1CCCNC1	Chemogenomic candidate	10	24	human fibroblast	2	43445	115	0.295652	0.704348	0.571429	0.320988	0.592593	0.0864198	0.428571	0.153846	0.0384615	0.0384615	80.0833	0.552381	0.346171	0.555718	0.0981105	0.447619	0.11087	0.120814	0.103	231110	tag healthy nuclei < 50 %
AZD-7762	Multiplex	EUB0000180b	NC(=O)Nc1cc(-c2cccc(F)c2)sc1C(=O)N[C@H]1CCCNC1	Chemogenomic candidate	10	24	HEK293T	1	-0.404493	184	0.146739	0.853261	0.663043	0.0764331	0.33758	0.585987	0.336957	0.5	1	0	293.167	0.429543	0.395461	0.147538	0.457001	0.570457	0.312274	0.510446	0.0420248	1.14297	tag healthy nuclei < 50 %
AZD-7762	Multiplex	EUB0000180b	NC(=O)Nc1cc(-c2cccc(F)c2)sc1C(=O)N[C@H]1CCCNC1	Chemogenomic candidate	10	48	U2OS	1	-0.70757	188	0.159574	0.840426	0.957447	0.0189873	0.386076	0.594937	0.0425532	0.333333	0.333333	0	330	0.352767	0.881662	0.0538695	0.0644681	0.647233	0.102719	0.0952982	0.0225671	1.00252	tag healthy nuclei < 50 %
AZD-7762	Multiplex	EUB0000180b	NC(=O)Nc1cc(-c2cccc(F)c2)sc1C(=O)N[C@H]1CCCNC1	Chemogenomic candidate	10	12	HEK293T	2	0.127943	179	0.0446927	0.955307	0.277778	0.28655	0.0818713	0.631579	0.722222	0.142857	0.306122	0	256.75	0.112092	0.454373	0.0637918	0.481836	0.887908	0.182057	0.132768	0.0724535	1.03765	tag healthy nuclei < 50 %
AZD-7762	Multiplex	EUB0000180b	NC(=O)Nc1cc(-c2cccc(F)c2)sc1C(=O)N[C@H]1CCCNC1	Chemogenomic candidate	10	0	human fibroblast	1	0	98	0.204082	0.795918	0.535714	0.282051	0.358974	0.358974	0.464286	0.181818	0.272727	0	125.417	0.662404	0.310276	0.328567	0.361157	0.337596	0.203306	0.230525	0.0840641	#DIV/0!	tag healthy nuclei < 50 %
AZD-7762	Multiplex	EUB0000180b	NC(=O)Nc1cc(-c2cccc(F)c2)sc1C(=O)N[C@H]1CCCNC1	Chemogenomic candidate	10	0	HEK293T	2	0	167	0.0239521	0.976048	0.102804	0.263804	0.0797546	0.656442	0.897196	0	0.186047	0	233.167	0.0929753	0.24237	0.0798532	0.677777	0.907025	0.0412417	0.171457	0.0110984	#DIV/0!	tag healthy nuclei < 50 %
AZD-7762	Multiplex	EUB0000180b	NC(=O)Nc1cc(-c2cccc(F)c2)sc1C(=O)N[C@H]1CCCNC1	Chemogenomic candidate	1	0	human fibroblast	2	0	95	0.252632	0.747368	0.6	0.366197	0.56338	0.0704225	0.4	0.0384615	0.0769231	0	99.3333	0.557903	0.293865	0.595118	0.111016	0.442097	0.112114	0.290215	0.0427216	#DIV/0!	tag healthy nuclei < 50 %
AZD-7762	Multiplex	EUB0000180b	NC(=O)Nc1cc(-c2cccc(F)c2)sc1C(=O)N[C@H]1CCCNC1	Chemogenomic candidate	10	12	HEK293T	1	-0.121956	177	0.186441	0.813559	0.741176	0.125	0.284722	0.590278	0.258824	0.5	0.888889	0.0555556	274.667	0.427177	0.372026	0.131275	0.496699	0.572823	0.324854	0.687273	0.0469186	1.209	tag healthy nuclei < 50 %, tag mitochondrial mass > 50 %
AZD-7762	Multiplex	EUB0000180b	NC(=O)Nc1cc(-c2cccc(F)c2)sc1C(=O)N[C@H]1CCCNC1	Chemogenomic candidate	10	48	HEK293T	1	-0.807504	191	0.21466	0.78534	0.75	0.0333333	0.433333	0.533333	0.25	0	1	0	351.333	0.392717	0.429172	0.195155	0.375673	0.607283	0.266274	0.27356	0.0493784	0.987254	tag healthy nuclei < 50 %, tag mitochondrial mass > 50 %
AZD-7762	Multiplex	EUB0000180b	NC(=O)Nc1cc(-c2cccc(F)c2)sc1C(=O)N[C@H]1CCCNC1	Chemogenomic candidate	10	0	HEK293T	1	0	177	0.141243	0.858757	0.37963	0.131579	0.157895	0.710526	0.62037	0	0.95	0	256.5	0.333294	0.212413	0.0958204	0.691766	0.666706	0.0141172	0.774309	0.00115741	#DIV/0!	tag healthy nuclei < 50 %, tag mitochondrial mass > 50 %
AZD-7762	Multiplex	EUB0000180b	NC(=O)Nc1cc(-c2cccc(F)c2)sc1C(=O)N[C@H]1CCCNC1	Chemogenomic candidate	10	24	HEK293T	2	-0.402999	1041	0.049952	0.950048	0.235669	0.349848	0.173913	0.476239	0.764331	0.635838	0.488439	0.109827	3025.33	0.160951	0.737455	0.183731	0.0788139	0.839049	0.452063	0.229554	0.0699568	0.474195	tag healthy nuclei < 50 %, tag tubulin effect > 50 %
AZD-7762	Multiplex	EUB0000180b	NC(=O)Nc1cc(-c2cccc(F)c2)sc1C(=O)N[C@H]1CCCNC1	Chemogenomic candidate	1	24	HEK293T	2	-0.467121	1019	0.0618253	0.938175	0.350202	0.398536	0.084728	0.516736	0.649798	0.624672	0.333333	0.0892388	3025.33	0.160951	0.737455	0.183731	0.0788139	0.839049	0.452063	0.229554	0.0699568	0.474195	tag healthy nuclei < 50 %, tag tubulin effect > 50 %
AZD-7762	Multiplex	EUB0000180b	NC(=O)Nc1cc(-c2cccc(F)c2)sc1C(=O)N[C@H]1CCCNC1	Chemogenomic candidate	10	48	HEK293T	2	-0.240881	161	0.0869565	0.913043	0.752294	0.122449	0.136054	0.741497	0.247706	0.611111	0.666667	0.0555556	594.833	0.0998693	0.826482	0.0664568	0.107061	0.900131	0.232673	0.0431769	0.0808889	1.00265	tag healthy nuclei < 50 %, tag tubulin effect > 50 %, tag mitochondrial mass > 50 %
AZD-7762	Multiplex	EUB0000180b	NC(=O)Nc1cc(-c2cccc(F)c2)sc1C(=O)N[C@H]1CCCNC1	Chemogenomic candidate	10	48	U2OS	2	-0.483803	75	0.213333	0.786667	1	0.440678	0.169492	0.389831	0	0.961538	0.923077	1	153.583	0.433939	0.864953	0.0805245	0.0545227	0.566061	0.197701	0.115167	0.0429551	1.00576	tag healthy nuclei < 50 %, tag tubulin effect > 50 %, tag mitochondrial mass > 50 %, tag membrane permeabilized > 50 %
AZD-7762	Multiplex	EUB0000180b	NC(=O)Nc1cc(-c2cccc(F)c2)sc1C(=O)N[C@H]1CCCNC1	Chemogenomic candidate	10	24	U2OS	2	-0.947975	75	0.2	0.8	0.925	0.166667	0.166667	0.666667	0.075	0.9	0.8	1	102.167	0.521098	0.831195	0.0931875	0.0756178	0.478902	0.166245	0.0748286	0.0347485	1.01542	tag healthy nuclei < 50 %, tag tubulin effect > 50 %, tag mitochondrial mass > 50 %, tag membrane permeabilized > 50 %
AZD-7762	Multiplex	EUB0000180b	NC(=O)Nc1cc(-c2cccc(F)c2)sc1C(=O)N[C@H]1CCCNC1	Chemogenomic candidate	10	24	human fibroblast	2	-0.947975	75	0.2	0.8	0.925	0.166667	0.166667	0.666667	0.075	0.9	0.8	1	108.083	0.521098	0.831195	0.0931875	0.0756178	0.478902	0.166245	0.0748286	0.0347485	1.01542	tag healthy nuclei < 50 %, tag tubulin effect > 50 %, tag mitochondrial mass > 50 %, tag membrane permeabilized > 50 %
AZD-7762	Multiplex	EUB0000180b	NC(=O)Nc1cc(-c2cccc(F)c2)sc1C(=O)N[C@H]1CCCNC1	Chemogenomic candidate	10	24	U2OS	1	-0.853711	189	0.10582	0.89418	0.857143	0.16568	0.130178	0.704142	0.142857	0.857143	0.785714	0.928571	276.667	0.370298	0.917275	0.0423433	0.0403816	0.629702	0.31212	0.21103	0.0682442	1.0014	tag healthy nuclei < 50 %, tag tubulin effect > 50 %, tag mitochondrial mass > 50 %, tag membrane permeabilized > 50 %
AZD-7762	Multiplex	EUB0000180b	NC(=O)Nc1cc(-c2cccc(F)c2)sc1C(=O)N[C@H]1CCCNC1	Chemogenomic candidate	10	24	U2OS	2	-0.76256	84	0.119048	0.880952	0.704545	0.189189	0.216216	0.594595	0.295455	0.642857	0.571429	0.642857	178.5	0.310463	0.888541	0.0624047	0.049054	0.689537	0.288716	0.291394	0.0647451	1.00514	tag healthy nuclei < 50 %, tag tubulin effect > 50 %, tag mitochondrial mass > 50 %, tag membrane permeabilized > 50 %
AZD-7762	Multiplex	EUB0000180b	NC(=O)Nc1cc(-c2cccc(F)c2)sc1C(=O)N[C@H]1CCCNC1	Chemogenomic candidate	10	0	human fibroblast	2	0	59	0.101695	0.898305	0.833333	0.641509	0.245283	0.113208	0.166667	0.0588235	0.117647	0.176471	101.167	0.681754	0.642258	0.240072	0.11767	0.318246	0.20189	0.247166	0.0567674	#DIV/0!
AZD-7762	Multiplex	EUB0000180b	NC(=O)Nc1cc(-c2cccc(F)c2)sc1C(=O)N[C@H]1CCCNC1	Chemogenomic candidate	1	24	U2OS	1	-0.305568	150	0.0666667	0.933333	0.4	0.528571	0.15	0.321429	0.6	0.351351	0.216216	0.162162	276.667	0.370298	0.917275	0.0423433	0.0403816	0.629702	0.31212	0.21103	0.0682442	1.0014
AZD-7762	Multiplex	EUB0000180b	NC(=O)Nc1cc(-c2cccc(F)c2)sc1C(=O)N[C@H]1CCCNC1	Chemogenomic candidate	1	12	U2OS	2	0.704108	110	0.154545	0.845455	0	0.817204	0.0860215	0.0967742	1	0.263158	0.105263	0.131579	139.167	0.248909	0.881032	0.0702926	0.0486752	0.751091	0.279715	0.240817	0.0972624	1.01342
AZD-7762	Multiplex	EUB0000180b	NC(=O)Nc1cc(-c2cccc(F)c2)sc1C(=O)N[C@H]1CCCNC1	Chemogenomic candidate	1	24	human fibroblast	1	1.21883	238	0.147059	0.852941	0.615385	0.62069	0.251232	0.128079	0.384615	0.0238095	0.015873	0.119048	242.833	0.651394	0.612787	0.255064	0.132149	0.348606	0.025027	0.0173706	0.0467803	1.19614
AZD-7762	Multiplex	EUB0000180b	NC(=O)Nc1cc(-c2cccc(F)c2)sc1C(=O)N[C@H]1CCCNC1	Chemogenomic candidate	10	0	U2OS	1	0	182	0.032967	0.967033	0.6	0.909091	0.0340909	0.0568182	0.4	0.1625	0.11875	0.1125	156.5	0.597808	0.882455	0.0611652	0.0563801	0.402192	0.271242	0.126392	0.10096	0
AZD-7762	Multiplex	EUB0000180b	NC(=O)Nc1cc(-c2cccc(F)c2)sc1C(=O)N[C@H]1CCCNC1	Chemogenomic candidate	1	24	human fibroblast	2	62.8069	68	0.264706	0.735294	#DIV/0!	0.6	0.4	0	#DIV/0!	0.1	0	0.1	80.0833	0.552381	0.346171	0.555718	0.0981105	0.447619	0.11087	0.120814	0.103	231110
AZD-7762	Multiplex	EUB0000180b	NC(=O)Nc1cc(-c2cccc(F)c2)sc1C(=O)N[C@H]1CCCNC1	Chemogenomic candidate	1	12	U2OS	1	0.603696	157	0.0382166	0.961783	0.25	0.81457	0.0794702	0.10596	0.75	0.268293	0.170732	0.097561	199.167	0.369403	0.889153	0.0559111	0.0549359	0.630597	0.260916	0.219385	0.107163	1.00798
AZD-7762	Multiplex	EUB0000180b	NC(=O)Nc1cc(-c2cccc(F)c2)sc1C(=O)N[C@H]1CCCNC1	Chemogenomic candidate	1	0	U2OS	2	0	78	0.192308	0.807692	0	0.873016	0.111111	0.015873	1	0.218182	0.254545	0.0909091	99.3333	#DIV/0!	0.877466	0.0854137	0.0371199	#DIV/0!	0.27287	0.183282	0.0858335	0
AZD-7762	Multiplex	EUB0000180b	NC(=O)Nc1cc(-c2cccc(F)c2)sc1C(=O)N[C@H]1CCCNC1	Chemogenomic candidate	1	12	human fibroblast	1	1.40939	226	0.146018	0.853982	0.69697	0.626943	0.202073	0.170984	0.30303	0.0165289	0	0.0826446	230.667	0.695283	0.596796	0.258529	0.144676	0.304717	0.0342007	0.0357415	0.0583164	1.23771
AZD-7762	Multiplex	EUB0000180b	NC(=O)Nc1cc(-c2cccc(F)c2)sc1C(=O)N[C@H]1CCCNC1	Chemogenomic candidate	10	0	U2OS	2	0	75	0.12	0.88	#DIV/0!	0.924242	0.0757576	0	#DIV/0!	0.196721	0.196721	0.0819672	99.3333	#DIV/0!	0.877466	0.0854137	0.0371199	#DIV/0!	0.27287	0.183282	0.0858335	0
AZD-7762	Multiplex	EUB0000180b	NC(=O)Nc1cc(-c2cccc(F)c2)sc1C(=O)N[C@H]1CCCNC1	Chemogenomic candidate	1	24	U2OS	2	-0.249473	97	0.185567	0.814433	0.375	0.518987	0.0759494	0.405063	0.625	0.341463	0.219512	0.0731707	178.5	0.310463	0.888541	0.0624047	0.049054	0.689537	0.288716	0.291394	0.0647451	1.00514
AZD-7762	Multiplex	EUB0000180b	NC(=O)Nc1cc(-c2cccc(F)c2)sc1C(=O)N[C@H]1CCCNC1	Chemogenomic candidate	10	12	human fibroblast	1	-0.124034	295	0.183051	0.816949	0.685714	0.514523	0.340249	0.145228	0.314286	0.0564516	0	0.0725806	230.667	0.695283	0.596796	0.258529	0.144676	0.304717	0.0342007	0.0357415	0.0583164	1.23771
AZD-7762	Multiplex	EUB0000180b	NC(=O)Nc1cc(-c2cccc(F)c2)sc1C(=O)N[C@H]1CCCNC1	Chemogenomic candidate	1	0	U2OS	1	0	124	0.0806452	0.919355	0	0.903509	0.0701754	0.0263158	1	0.223301	0.116505	0.0679612	156.5	0.597808	0.882455	0.0611652	0.0563801	0.402192	0.271242	0.126392	0.10096	0
AZD-7762	Multiplex	EUB0000180b	NC(=O)Nc1cc(-c2cccc(F)c2)sc1C(=O)N[C@H]1CCCNC1	Chemogenomic candidate	10	0	U2OS	1	0	193	0.11399	0.88601	0.294118	0.77193	0.128655	0.0994152	0.705882	0.121212	0.257576	0.0530303	152.167	0.315784	0.706662	0.13121	0.162128	0.684216	0.118789	0.261243	0.0625529	0
AZD-7762	Multiplex	EUB0000180b	NC(=O)Nc1cc(-c2cccc(F)c2)sc1C(=O)N[C@H]1CCCNC1	Chemogenomic candidate	1	12	HEK293T	2	-0.119467	1132	0.0556537	0.944346	0.188406	0.739008	0.0673527	0.193639	0.811594	0.250633	0.2	0.0518987	1765.83	0.0828653	0.866876	0.0909282	0.0421957	0.917135	0.0464362	0.0760075	0.0151675	0.999314
AZD-7762	Multiplex	EUB0000180b	NC(=O)Nc1cc(-c2cccc(F)c2)sc1C(=O)N[C@H]1CCCNC1	Chemogenomic candidate	1	12	HEK293T	1	-0.269862	661	0.133132	0.866868	0.188312	0.547993	0.183246	0.268761	0.811688	0.0318471	0.0573248	0.0509554	691.5	0.185934	0.698273	0.149796	0.151931	0.814066	0.0267306	0.0412745	0.044192	1.10218
AZD-7762	Multiplex	EUB0000180b	NC(=O)Nc1cc(-c2cccc(F)c2)sc1C(=O)N[C@H]1CCCNC1	Chemogenomic candidate	10	12	HEK293T	1	-0.255163	740	0.145946	0.854054	0.217391	0.547468	0.234177	0.218354	0.782609	0.083815	0.118497	0.0491329	691.5	0.185934	0.698273	0.149796	0.151931	0.814066	0.0267306	0.0412745	0.044192	1.10218
AZD-7762	Multiplex	EUB0000180b	NC(=O)Nc1cc(-c2cccc(F)c2)sc1C(=O)N[C@H]1CCCNC1	Chemogenomic candidate	1	0	HEK293T	1	0	928	0.195962	0.804038	0.144444	0.51551	0.218612	0.265879	0.855556	0.0229226	0.146132	0.0401146	865.667	0.13691	0.491163	0.230041	0.278796	0.86309	0.0185405	0.129798	0.0320833	#DIV/0!
AZD-7762	Multiplex	EUB0000180b	NC(=O)Nc1cc(-c2cccc(F)c2)sc1C(=O)N[C@H]1CCCNC1	Chemogenomic candidate	10	0	HEK293T	1	0	898	0.194536	0.805464	0.178378	0.518318	0.230665	0.251018	0.821622	0.0418848	0.180628	0.0366492	865.667	0.13691	0.491163	0.230041	0.278796	0.86309	0.0185405	0.129798	0.0320833	#DIV/0!
AZD-7762	Multiplex	EUB0000180b	NC(=O)Nc1cc(-c2cccc(F)c2)sc1C(=O)N[C@H]1CCCNC1	Chemogenomic candidate	10	12	HEK293T	2	0.0349184	1099	0.0245678	0.975432	0.0979592	0.662313	0.109142	0.228545	0.902041	0.211268	0.187324	0.0338028	1765.83	0.0828653	0.866876	0.0909282	0.0421957	0.917135	0.0464362	0.0760075	0.0151675	0.999314
AZD-7762	Multiplex	EUB0000180b	NC(=O)Nc1cc(-c2cccc(F)c2)sc1C(=O)N[C@H]1CCCNC1	Chemogenomic candidate	10	0	human fibroblast	1	0	217	0.0737327	0.926267	0.795455	0.522388	0.258706	0.218905	0.204545	0.00952381	0.0380952	0.00952381	211.75	0.805591	0.539397	0.278942	0.181661	0.194409	0.021052	0.100182	0.0283348	#DIV/0!
AZD-7762	Multiplex	EUB0000180b	NC(=O)Nc1cc(-c2cccc(F)c2)sc1C(=O)N[C@H]1CCCNC1	Chemogenomic candidate	1	0	human fibroblast	1	0	202	0.10396	0.89604	0.592593	0.59116	0.259669	0.149171	0.407407	0.00934579	0.046729	0.00934579	211.75	0.805591	0.539397	0.278942	0.181661	0.194409	0.021052	0.100182	0.0283348	#DIV/0!
AZD-7762	Multiplex	EUB0000180b	NC(=O)Nc1cc(-c2cccc(F)c2)sc1C(=O)N[C@H]1CCCNC1	Chemogenomic candidate	10	0	HEK293T	2	0	941	0.0276302	0.97237	0.170455	0.753005	0.0546448	0.19235	0.829545	0.00145138	0.314949	0.00290276	1080.25	0.142406	0.776982	0.0533037	0.169714	0.857594	0.00453037	0.323128	0.00113292	#DIV/0!
AZD-7762	Multiplex	EUB0000180b	NC(=O)Nc1cc(-c2cccc(F)c2)sc1C(=O)N[C@H]1CCCNC1	Chemogenomic candidate	1	0	HEK293T	2	0	1131	0.0194518	0.980548	0.137725	0.796213	0.0532011	0.150586	0.862275	0.00566251	0.277463	0	1080.25	0.142406	0.776982	0.0533037	0.169714	0.857594	0.00453037	0.323128	0.00113292	#DIV/0!
AZD-7762	Multiplex	EUB0000180b	NC(=O)Nc1cc(-c2cccc(F)c2)sc1C(=O)N[C@H]1CCCNC1	Chemogenomic candidate	10	0	U2OS	2	0	78	0.0641026	0.935897	0.2	0.835616	0.0273973	0.136986	0.8	0.147541	0.114754	0	70.3333	0.262184	0.811025	0.0807672	0.108207	0.737816	0.0985605	0.153729	0.0272522	0
AZELASTINE	Multiplex	EUB0000486aCl	[H]Cl.CN1CCCC(CC1)N1N=C(CC2=CC=C(Cl)C=C2)C2=CC=CC=C2C1=O	Chemogenomic candidate	10	0	human fibroblast	1	0	138	0.0507246	0.949275	0.622222	0.335878	0.320611	0.343511	0.377778	0.295455	0.272727	0.0681818	125.417	0.662404	0.310276	0.328567	0.361157	0.337596	0.203306	0.230525	0.0840641	#DIV/0!	tag healthy nuclei < 50 %
AZELASTINE	Multiplex	EUB0000486aCl	[H]Cl.CN1CCCC(CC1)N1N=C(CC2=CC=C(Cl)C=C2)C2=CC=CC=C2C1=O	Chemogenomic candidate	1	0	human fibroblast	1	0	109	0.137615	0.862385	0.592593	0.382979	0.329787	0.287234	0.407407	0.277778	0.166667	0.0555556	125.417	0.662404	0.310276	0.328567	0.361157	0.337596	0.203306	0.230525	0.0840641	#DIV/0!	tag healthy nuclei < 50 %
AZELASTINE	Multiplex	EUB0000486aCl	[H]Cl.CN1CCCC(CC1)N1N=C(CC2=CC=C(Cl)C=C2)C2=CC=CC=C2C1=O	Chemogenomic candidate	10	0	HEK293T	2	0	247	0.0283401	0.97166	0.0914634	0.229167	0.0875	0.683333	0.908537	0.0181818	0.181818	0	233.167	0.0929753	0.24237	0.0798532	0.677777	0.907025	0.0412417	0.171457	0.0110984	#DIV/0!	tag healthy nuclei < 50 %
AZELASTINE	Multiplex	EUB0000486aCl	[H]Cl.CN1CCCC(CC1)N1N=C(CC2=CC=C(Cl)C=C2)C2=CC=CC=C2C1=O	Chemogenomic candidate	1	0	HEK293T	2	0	208	0.0817308	0.918269	0.0992366	0.26178	0.052356	0.685864	0.900763	0	0.08	0	233.167	0.0929753	0.24237	0.0798532	0.677777	0.907025	0.0412417	0.171457	0.0110984	#DIV/0!	tag healthy nuclei < 50 %
AZELASTINE	Multiplex	EUB0000486aCl	[H]Cl.CN1CCCC(CC1)N1N=C(CC2=CC=C(Cl)C=C2)C2=CC=CC=C2C1=O	Chemogenomic candidate	10	24	HEK293T	2	0.131581	230	0.0782609	0.921739	0.934959	0.330189	0.0896226	0.580189	0.0650407	0.385714	1	0.0428571	322.417	0.125402	0.652444	0.053119	0.294437	0.874598	0.274867	0.112063	0.0970907	1.01358	tag healthy nuclei < 50 %, tag mitochondrial mass > 50 %
AZELASTINE	Multiplex	EUB0000486aCl	[H]Cl.CN1CCCC(CC1)N1N=C(CC2=CC=C(Cl)C=C2)C2=CC=CC=C2C1=O	Chemogenomic candidate	1	0	HEK293T	1	0	329	0.0851064	0.914894	0.293578	0.20598	0.0697674	0.724252	0.706422	0.0483871	0.870968	0.016129	256.5	0.333294	0.212413	0.0958204	0.691766	0.666706	0.0141172	0.774309	0.00115741	#DIV/0!	tag healthy nuclei < 50 %, tag mitochondrial mass > 50 %
AZELASTINE	Multiplex	EUB0000486aCl	[H]Cl.CN1CCCC(CC1)N1N=C(CC2=CC=C(Cl)C=C2)C2=CC=CC=C2C1=O	Chemogenomic candidate	10	48	HEK293T	1	-0.668618	297	0.279461	0.720539	0.797468	0.0607477	0.200935	0.738318	0.202532	0.384615	1	0	351.333	0.392717	0.429172	0.195155	0.375673	0.607283	0.266274	0.27356	0.0493784	0.987254	tag healthy nuclei < 50 %, tag mitochondrial mass > 50 %
AZELASTINE	Multiplex	EUB0000486aCl	[H]Cl.CN1CCCC(CC1)N1N=C(CC2=CC=C(Cl)C=C2)C2=CC=CC=C2C1=O	Chemogenomic candidate	10	0	HEK293T	1	0	290	0.062069	0.937931	0.372973	0.25	0.0698529	0.680147	0.627027	0.0147059	0.882353	0	256.5	0.333294	0.212413	0.0958204	0.691766	0.666706	0.0141172	0.774309	0.00115741	#DIV/0!	tag healthy nuclei < 50 %, tag mitochondrial mass > 50 %
AZELASTINE	Multiplex	EUB0000486aCl	[H]Cl.CN1CCCC(CC1)N1N=C(CC2=CC=C(Cl)C=C2)C2=CC=CC=C2C1=O	Chemogenomic candidate	1	24	human fibroblast	1	0	95	0.105263	0.894737	0.409091	0.423529	0.317647	0.258824	0.590909	0.666667	0.111111	0.361111	106.75	0.494315	0.513538	0.210808	0.275654	0.505685	0.339408	0.0326339	0.298699	1.11839	tag healthy nuclei < 50 %, tag tubulin effect > 50 %
AZELASTINE	Multiplex	EUB0000486aCl	[H]Cl.CN1CCCC(CC1)N1N=C(CC2=CC=C(Cl)C=C2)C2=CC=CC=C2C1=O	Chemogenomic candidate	1	48	human fibroblast	1	2.45099	95	0.115789	0.884211	0.588235	0.416667	0.380952	0.202381	0.411765	0.542857	0.114286	0.285714	110.667	0.531499	0.514801	0.276708	0.208491	0.468501	0.298464	0.0241518	0.276892	5.201	tag healthy nuclei < 50 %, tag tubulin effect > 50 %
AZELASTINE	Multiplex	EUB0000486aCl	[H]Cl.CN1CCCC(CC1)N1N=C(CC2=CC=C(Cl)C=C2)C2=CC=CC=C2C1=O	Chemogenomic candidate	10	12	human fibroblast	1	-0.0683373	138	0.188406	0.811594	0.74359	0.383929	0.267857	0.348214	0.25641	0.930233	0.55814	0.139535	107.083	0.631736	0.44459	0.220734	0.334676	0.368264	0.315502	0.0769574	0.274792	1.29875	tag healthy nuclei < 50 %, tag tubulin effect > 50 %, tag mitochondrial mass > 50 %
AZELASTINE	Multiplex	EUB0000486aCl	[H]Cl.CN1CCCC(CC1)N1N=C(CC2=CC=C(Cl)C=C2)C2=CC=CC=C2C1=O	Chemogenomic candidate	1	24	HEK293T	2	0.469857	223	0.044843	0.955157	0.5	0.497653	0.0704225	0.431925	0.5	0.745283	0.660377	0.0566038	322.417	0.125402	0.652444	0.053119	0.294437	0.874598	0.274867	0.112063	0.0970907	1.01358	tag healthy nuclei < 50 %, tag tubulin effect > 50 %, tag mitochondrial mass > 50 %
AZELASTINE	Multiplex	EUB0000486aCl	[H]Cl.CN1CCCC(CC1)N1N=C(CC2=CC=C(Cl)C=C2)C2=CC=CC=C2C1=O	Chemogenomic candidate	1	12	HEK293T	2	-0.11115	190	0.0526316	0.947368	0.408	0.244444	0.0611111	0.694444	0.592	0.681818	0.613636	0.0454545	256.75	0.112092	0.454373	0.0637918	0.481836	0.887908	0.182057	0.132768	0.0724535	1.03765	tag healthy nuclei < 50 %, tag tubulin effect > 50 %, tag mitochondrial mass > 50 %
AZELASTINE	Multiplex	EUB0000486aCl	[H]Cl.CN1CCCC(CC1)N1N=C(CC2=CC=C(Cl)C=C2)C2=CC=CC=C2C1=O	Chemogenomic candidate	10	12	HEK293T	2	-0.0672306	231	0.047619	0.952381	0.897436	0.231818	0.0590909	0.709091	0.102564	0.568627	0.980392	0.0392157	256.75	0.112092	0.454373	0.0637918	0.481836	0.887908	0.182057	0.132768	0.0724535	1.03765	tag healthy nuclei < 50 %, tag tubulin effect > 50 %, tag mitochondrial mass > 50 %
AZELASTINE	Multiplex	EUB0000486aCl	[H]Cl.CN1CCCC(CC1)N1N=C(CC2=CC=C(Cl)C=C2)C2=CC=CC=C2C1=O	Chemogenomic candidate	1	24	HEK293T	1	0.904811	353	0.116147	0.883853	0.56213	0.375	0.0833333	0.541667	0.43787	0.837607	0.923077	0.034188	293.167	0.429543	0.395461	0.147538	0.457001	0.570457	0.312274	0.510446	0.0420248	1.14297	tag healthy nuclei < 50 %, tag tubulin effect > 50 %, tag mitochondrial mass > 50 %
AZELASTINE	Multiplex	EUB0000486aCl	[H]Cl.CN1CCCC(CC1)N1N=C(CC2=CC=C(Cl)C=C2)C2=CC=CC=C2C1=O	Chemogenomic candidate	1	48	HEK293T	1	1.28365	404	0.141089	0.858911	0.493243	0.423631	0.149856	0.426513	0.506757	0.707483	0.727891	0.0340136	351.333	0.392717	0.429172	0.195155	0.375673	0.607283	0.266274	0.27356	0.0493784	0.987254	tag healthy nuclei < 50 %, tag tubulin effect > 50 %, tag mitochondrial mass > 50 %
AZELASTINE	Multiplex	EUB0000486aCl	[H]Cl.CN1CCCC(CC1)N1N=C(CC2=CC=C(Cl)C=C2)C2=CC=CC=C2C1=O	Chemogenomic candidate	1	12	HEK293T	1	1.39979	333	0.0990991	0.900901	0.506667	0.42	0.08	0.5	0.493333	0.849206	0.944444	0.031746	274.667	0.427177	0.372026	0.131275	0.496699	0.572823	0.324854	0.687273	0.0469186	1.209	tag healthy nuclei < 50 %, tag tubulin effect > 50 %, tag mitochondrial mass > 50 %
AZELASTINE	Multiplex	EUB0000486aCl	[H]Cl.CN1CCCC(CC1)N1N=C(CC2=CC=C(Cl)C=C2)C2=CC=CC=C2C1=O	Chemogenomic candidate	10	12	HEK293T	1	-0.512436	289	0.193772	0.806228	0.821429	0.16309	0.11588	0.72103	0.178571	0.789474	1	0.0263158	274.667	0.427177	0.372026	0.131275	0.496699	0.572823	0.324854	0.687273	0.0469186	1.209	tag healthy nuclei < 50 %, tag tubulin effect > 50 %, tag mitochondrial mass > 50 %
AZELASTINE	Multiplex	EUB0000486aCl	[H]Cl.CN1CCCC(CC1)N1N=C(CC2=CC=C(Cl)C=C2)C2=CC=CC=C2C1=O	Chemogenomic candidate	10	24	HEK293T	1	-0.534602	289	0.197232	0.802768	0.821429	0.137931	0.137931	0.724138	0.178571	0.59375	1	0	293.167	0.429543	0.395461	0.147538	0.457001	0.570457	0.312274	0.510446	0.0420248	1.14297	tag healthy nuclei < 50 %, tag tubulin effect > 50 %, tag mitochondrial mass > 50 %
AZELASTINE	Multiplex	EUB0000486aCl	[H]Cl.CN1CCCC(CC1)N1N=C(CC2=CC=C(Cl)C=C2)C2=CC=CC=C2C1=O	Chemogenomic candidate	10	48	U2OS	2	-0.151704	119	0.0504202	0.94958	0.939394	0.486726	0.221239	0.292035	0.0606061	1	0.981818	0.981818	153.583	0.433939	0.864953	0.0805245	0.0545227	0.566061	0.197701	0.115167	0.0429551	1.00576	tag healthy nuclei < 50 %, tag tubulin effect > 50 %, tag mitochondrial mass > 50 %, tag membrane permeabilized > 50 %
AZELASTINE	Multiplex	EUB0000486aCl	[H]Cl.CN1CCCC(CC1)N1N=C(CC2=CC=C(Cl)C=C2)C2=CC=CC=C2C1=O	Chemogenomic candidate	10	24	U2OS	1	-0.0891336	99	0.10101	0.89899	0.909091	0.460674	0.292135	0.247191	0.0909091	1	0.97561	0.95122	212.417	0.319581	0.825187	0.0885786	0.0862345	0.680419	0.098522	0.0722682	0.0503222	0.99162	tag healthy nuclei < 50 %, tag tubulin effect > 50 %, tag mitochondrial mass > 50 %, tag membrane permeabilized > 50 %
AZELASTINE	Multiplex	EUB0000486aCl	[H]Cl.CN1CCCC(CC1)N1N=C(CC2=CC=C(Cl)C=C2)C2=CC=CC=C2C1=O	Chemogenomic candidate	10	48	U2OS	1	-0.255551	95	0.115789	0.884211	0.870968	0.392857	0.238095	0.369048	0.129032	1	1	0.939394	330	0.352767	0.881662	0.0538695	0.0644681	0.647233	0.102719	0.0952982	0.0225671	1.00252	tag healthy nuclei < 50 %, tag tubulin effect > 50 %, tag mitochondrial mass > 50 %, tag membrane permeabilized > 50 %
AZELASTINE	Multiplex	EUB0000486aCl	[H]Cl.CN1CCCC(CC1)N1N=C(CC2=CC=C(Cl)C=C2)C2=CC=CC=C2C1=O	Chemogenomic candidate	1	24	U2OS	2	0.304306	57	0.0877193	0.912281	0.5	0.769231	0.0769231	0.153846	0.5	0.5	0.575	0.1	102.167	0.521098	0.831195	0.0931875	0.0756178	0.478902	0.166245	0.0748286	0.0347485	1.01542	tag mitochondrial mass > 50 %
AZELASTINE	Multiplex	EUB0000486aCl	[H]Cl.CN1CCCC(CC1)N1N=C(CC2=CC=C(Cl)C=C2)C2=CC=CC=C2C1=O	Chemogenomic candidate	1	24	human fibroblast	2	0.304306	57	0.0877193	0.912281	0.5	0.769231	0.0769231	0.153846	0.5	0.5	0.575	0.1	108.083	0.521098	0.831195	0.0931875	0.0756178	0.478902	0.166245	0.0748286	0.0347485	1.01542	tag mitochondrial mass > 50 %
AZELASTINE	Multiplex	EUB0000486aCl	[H]Cl.CN1CCCC(CC1)N1N=C(CC2=CC=C(Cl)C=C2)C2=CC=CC=C2C1=O	Chemogenomic candidate	10	48	HEK293T	2	0.238075	231	0.186147	0.813853	0.890625	0.574468	0.0851064	0.340426	0.109375	0.157407	0.990741	0	594.833	0.0998693	0.826482	0.0664568	0.107061	0.900131	0.232673	0.0431769	0.0808889	1.00265	tag mitochondrial mass > 50 %
AZELASTINE	Multiplex	EUB0000486aCl	[H]Cl.CN1CCCC(CC1)N1N=C(CC2=CC=C(Cl)C=C2)C2=CC=CC=C2C1=O	Chemogenomic candidate	1	12	human fibroblast	1	0.492469	92	0.119565	0.880435	0.473684	0.506173	0.259259	0.234568	0.526316	0.658537	0.097561	0.268293	107.083	0.631736	0.44459	0.220734	0.334676	0.368264	0.315502	0.0769574	0.274792	1.29875	tag tubulin effect > 50 %
AZELASTINE	Multiplex	EUB0000486aCl	[H]Cl.CN1CCCC(CC1)N1N=C(CC2=CC=C(Cl)C=C2)C2=CC=CC=C2C1=O	Chemogenomic candidate	10	48	human fibroblast	2	4.08292	253	0.256917	0.743083	0.666667	0.579787	0.388298	0.0319149	0.333333	0.889908	0.394495	0.220183	108	0.498611	0.755765	0.214424	0.0298114	0.501389	0.304063	0.0278827	0.153127	1.11404	tag tubulin effect > 50 %
AZELASTINE	Multiplex	EUB0000486aCl	[H]Cl.CN1CCCC(CC1)N1N=C(CC2=CC=C(Cl)C=C2)C2=CC=CC=C2C1=O	Chemogenomic candidate	10	48	human fibroblast	1	-0.578	207	0.304348	0.695652	0.9	0.520833	0.409722	0.0694444	0.1	0.84	0.346667	0.133333	110.667	0.531499	0.514801	0.276708	0.208491	0.468501	0.298464	0.0241518	0.276892	5.201	tag tubulin effect > 50 %
AZELASTINE	Multiplex	EUB0000486aCl	[H]Cl.CN1CCCC(CC1)N1N=C(CC2=CC=C(Cl)C=C2)C2=CC=CC=C2C1=O	Chemogenomic candidate	1	48	human fibroblast	2	2.21692	123	0.0894309	0.910569	0.75	0.616071	0.3125	0.0714286	0.25	0.73913	0.0144928	0.101449	108	0.498611	0.755765	0.214424	0.0298114	0.501389	0.304063	0.0278827	0.153127	1.11404	tag tubulin effect > 50 %
AZELASTINE	Multiplex	EUB0000486aCl	[H]Cl.CN1CCCC(CC1)N1N=C(CC2=CC=C(Cl)C=C2)C2=CC=CC=C2C1=O	Chemogenomic candidate	1	48	HEK293T	2	0.550736	324	0.058642	0.941358	0.47561	0.655738	0.0754098	0.268852	0.52439	0.715	0.485	0.06	594.833	0.0998693	0.826482	0.0664568	0.107061	0.900131	0.232673	0.0431769	0.0808889	1.00265	tag tubulin effect > 50 %
AZELASTINE	Multiplex	EUB0000486aCl	[H]Cl.CN1CCCC(CC1)N1N=C(CC2=CC=C(Cl)C=C2)C2=CC=CC=C2C1=O	Chemogenomic candidate	1	48	U2OS	1	0.494585	143	0.0629371	0.937063	0.545455	0.679104	0.156716	0.164179	0.454545	0.538462	0.373626	0.0549451	330	0.352767	0.881662	0.0538695	0.0644681	0.647233	0.102719	0.0952982	0.0225671	1.00252	tag tubulin effect > 50 %
AZELASTINE	Multiplex	EUB0000486aCl	[H]Cl.CN1CCCC(CC1)N1N=C(CC2=CC=C(Cl)C=C2)C2=CC=CC=C2C1=O	Chemogenomic candidate	10	24	human fibroblast	1	1.53507	161	0.180124	0.819876	0.842105	0.530303	0.325758	0.143939	0.157895	0.9	0.628571	0.171429	106.75	0.494315	0.513538	0.210808	0.275654	0.505685	0.339408	0.0326339	0.298699	1.11839	tag tubulin effect > 50 %, tag mitochondrial mass > 50 %
AZELASTINE	Multiplex	EUB0000486aCl	[H]Cl.CN1CCCC(CC1)N1N=C(CC2=CC=C(Cl)C=C2)C2=CC=CC=C2C1=O	Chemogenomic candidate	1	12	U2OS	1	-0.192658	95	0.0842105	0.915789	0.428571	0.712644	0.126437	0.16092	0.571429	0.709677	0.645161	0.112903	165.75	0.37331	0.780206	0.114105	0.10569	0.62669	0.0951184	0.0845665	0.073208	1.05123	tag tubulin effect > 50 %, tag mitochondrial mass > 50 %
AZELASTINE	Multiplex	EUB0000486aCl	[H]Cl.CN1CCCC(CC1)N1N=C(CC2=CC=C(Cl)C=C2)C2=CC=CC=C2C1=O	Chemogenomic candidate	1	12	U2OS	2	0.662733	51	0.117647	0.882353	0.25	0.844444	0.0666667	0.0888889	0.75	0.684211	0.578947	0.0789474	78.3333	0.502249	0.830741	0.0963907	0.0728682	0.497751	0.154861	0.0827165	0.0293447	1.11609	tag tubulin effect > 50 %, tag mitochondrial mass > 50 %
AZELASTINE	Multiplex	EUB0000486aCl	[H]Cl.CN1CCCC(CC1)N1N=C(CC2=CC=C(Cl)C=C2)C2=CC=CC=C2C1=O	Chemogenomic candidate	1	12	human fibroblast	2	0.662733	51	0.117647	0.882353	0.25	0.844444	0.0666667	0.0888889	0.75	0.684211	0.578947	0.0789474	106.333	0.502249	0.830741	0.0963907	0.0728682	0.497751	0.154861	0.0827165	0.0293447	1.11609	tag tubulin effect > 50 %, tag mitochondrial mass > 50 %
AZELASTINE	Multiplex	EUB0000486aCl	[H]Cl.CN1CCCC(CC1)N1N=C(CC2=CC=C(Cl)C=C2)C2=CC=CC=C2C1=O	Chemogenomic candidate	1	24	U2OS	1	0.0200796	108	0.0555556	0.944444	0.333333	0.656863	0.166667	0.176471	0.666667	0.686567	0.701493	0.0597015	212.417	0.319581	0.825187	0.0885786	0.0862345	0.680419	0.098522	0.0722682	0.0503222	0.99162	tag tubulin effect > 50 %, tag mitochondrial mass > 50 %
AZELASTINE	Multiplex	EUB0000486aCl	[H]Cl.CN1CCCC(CC1)N1N=C(CC2=CC=C(Cl)C=C2)C2=CC=CC=C2C1=O	Chemogenomic candidate	10	24	U2OS	2	-0.313974	96	0.0416667	0.958333	0.956522	0.586957	0.163043	0.25	0.0434783	1	1	0.981481	102.167	0.521098	0.831195	0.0931875	0.0756178	0.478902	0.166245	0.0748286	0.0347485	1.01542	tag tubulin effect > 50 %, tag mitochondrial mass > 50 %, tag membrane permeabilized > 50 %
AZELASTINE	Multiplex	EUB0000486aCl	[H]Cl.CN1CCCC(CC1)N1N=C(CC2=CC=C(Cl)C=C2)C2=CC=CC=C2C1=O	Chemogenomic candidate	10	24	human fibroblast	2	-0.313974	96	0.0416667	0.958333	0.956522	0.586957	0.163043	0.25	0.0434783	1	1	0.981481	108.083	0.521098	0.831195	0.0931875	0.0756178	0.478902	0.166245	0.0748286	0.0347485	1.01542	tag tubulin effect > 50 %, tag mitochondrial mass > 50 %, tag membrane permeabilized > 50 %
AZELASTINE	Multiplex	EUB0000486aCl	[H]Cl.CN1CCCC(CC1)N1N=C(CC2=CC=C(Cl)C=C2)C2=CC=CC=C2C1=O	Chemogenomic candidate	10	12	U2OS	2	-0.186383	96	0.0416667	0.958333	0.571429	0.706522	0.141304	0.152174	0.428571	1	0.984615	0.846154	78.3333	0.502249	0.830741	0.0963907	0.0728682	0.497751	0.154861	0.0827165	0.0293447	1.11609	tag tubulin effect > 50 %, tag mitochondrial mass > 50 %, tag membrane permeabilized > 50 %
AZELASTINE	Multiplex	EUB0000486aCl	[H]Cl.CN1CCCC(CC1)N1N=C(CC2=CC=C(Cl)C=C2)C2=CC=CC=C2C1=O	Chemogenomic candidate	10	12	human fibroblast	2	-0.186383	96	0.0416667	0.958333	0.571429	0.706522	0.141304	0.152174	0.428571	1	0.984615	0.846154	106.333	0.502249	0.830741	0.0963907	0.0728682	0.497751	0.154861	0.0827165	0.0293447	1.11609	tag tubulin effect > 50 %, tag mitochondrial mass > 50 %, tag membrane permeabilized > 50 %
AZELASTINE	Multiplex	EUB0000486aCl	[H]Cl.CN1CCCC(CC1)N1N=C(CC2=CC=C(Cl)C=C2)C2=CC=CC=C2C1=O	Chemogenomic candidate	10	12	U2OS	1	-0.278374	87	0.126437	0.873563	0.636364	0.526316	0.184211	0.289474	0.363636	0.975	0.975	0.775	165.75	0.37331	0.780206	0.114105	0.10569	0.62669	0.0951184	0.0845665	0.073208	1.05123	tag tubulin effect > 50 %, tag mitochondrial mass > 50 %, tag membrane permeabilized > 50 %
AZELASTINE	Multiplex	EUB0000486aCl	[H]Cl.CN1CCCC(CC1)N1N=C(CC2=CC=C(Cl)C=C2)C2=CC=CC=C2C1=O	Chemogenomic candidate	1	48	U2OS	2	0.410912	77	0.0779221	0.922078	0.5	0.746479	0.112676	0.140845	0.5	0.471698	0.415094	0.169811	153.583	0.433939	0.864953	0.0805245	0.0545227	0.566061	0.197701	0.115167	0.0429551	1.00576
AZELASTINE	Multiplex	EUB0000486aCl	[H]Cl.CN1CCCC(CC1)N1N=C(CC2=CC=C(Cl)C=C2)C2=CC=CC=C2C1=O	Chemogenomic candidate	10	0	U2OS	1	0	85	0.129412	0.870588	0.4	0.594595	0.202703	0.202703	0.6	0.204545	0.409091	0.136364	152.167	0.315784	0.706662	0.13121	0.162128	0.684216	0.118789	0.261243	0.0625529	0
AZELASTINE	Multiplex	EUB0000486aCl	[H]Cl.CN1CCCC(CC1)N1N=C(CC2=CC=C(Cl)C=C2)C2=CC=CC=C2C1=O	Chemogenomic candidate	1	0	U2OS	1	0	100	0.15	0.85	0.333333	0.776471	0.152941	0.0705882	0.666667	0.181818	0.333333	0.0909091	152.167	0.315784	0.706662	0.13121	0.162128	0.684216	0.118789	0.261243	0.0625529	0
AZELASTINE	Multiplex	EUB0000486aCl	[H]Cl.CN1CCCC(CC1)N1N=C(CC2=CC=C(Cl)C=C2)C2=CC=CC=C2C1=O	Chemogenomic candidate	1	0	human fibroblast	2	0	78	0.115385	0.884615	0.428571	0.666667	0.231884	0.101449	0.571429	0.173913	0.152174	0.0869565	101.167	0.681754	0.642258	0.240072	0.11767	0.318246	0.20189	0.247166	0.0567674	#DIV/0!
AZELASTINE	Multiplex	EUB0000486aCl	[H]Cl.CN1CCCC(CC1)N1N=C(CC2=CC=C(Cl)C=C2)C2=CC=CC=C2C1=O	Chemogenomic candidate	1	0	U2OS	2	0	51	0.0784314	0.921569	0.25	0.723404	0.106383	0.170213	0.75	0.0588235	0.235294	0.0294118	70.3333	0.262184	0.811025	0.0807672	0.108207	0.737816	0.0985605	0.153729	0.0272522	0
AZELASTINE	Multiplex	EUB0000486aCl	[H]Cl.CN1CCCC(CC1)N1N=C(CC2=CC=C(Cl)C=C2)C2=CC=CC=C2C1=O	Chemogenomic candidate	10	0	human fibroblast	2	0	115	0.104348	0.895652	0.454545	0.601942	0.291262	0.106796	0.545455	0.209677	0.354839	0	101.167	0.681754	0.642258	0.240072	0.11767	0.318246	0.20189	0.247166	0.0567674	#DIV/0!
AZELASTINE	Multiplex	EUB0000486aCl	[H]Cl.CN1CCCC(CC1)N1N=C(CC2=CC=C(Cl)C=C2)C2=CC=CC=C2C1=O	Chemogenomic candidate	10	0	U2OS	2	0	91	0.0769231	0.923077	0.166667	0.809524	0.119048	0.0714286	0.833333	0.0441176	0.191176	0	70.3333	0.262184	0.811025	0.0807672	0.108207	0.737816	0.0985605	0.153729	0.0272522	0
BAY 12-17389	Multiplex	EUB0000634a	CC1=C(C=CC(=C1)C2=CN=C3N2N=C(C=C3NCCC(F)(F)F)OC4=C(C(=C(C=C4)OC)F)F)C(=O)NC5CC5	Chemogenomic candidate	10	12	human fibroblast	2	-1	170	0.235294	0.764706	0.65	0.338462	0.353846	0.307692	0.35	0.386364	0.340909	0.204545	84.3333	0.520833	0.311795	0.58592	0.102285	0.479167	0.125354	0.149616	0.0949875	7.64557e+11	tag healthy nuclei < 50 %
BAY 12-17389	Multiplex	EUB0000634a	CC1=C(C=CC(=C1)C2=CN=C3N2N=C(C=C3NCCC(F)(F)F)OC4=C(C(=C(C=C4)OC)F)F)C(=O)NC5CC5	Chemogenomic candidate	10	12	human fibroblast	1	1.09528	203	0.187192	0.812808	0.631579	0.484848	0.284848	0.230303	0.368421	0.45	0.225	0.1875	230.667	0.695283	0.596796	0.258529	0.144676	0.304717	0.0342007	0.0357415	0.0583164	1.23771	tag healthy nuclei < 50 %
BAY 12-17389	Multiplex	EUB0000634a	CC1=C(C=CC(=C1)C2=CN=C3N2N=C(C=C3NCCC(F)(F)F)OC4=C(C(=C(C=C4)OC)F)F)C(=O)NC5CC5	Chemogenomic candidate	10	12	human fibroblast	2	3.04214e+07	86	0.348837	0.651163	0.222222	0.285714	0.553571	0.160714	0.777778	0.5	0.1875	0.1875	84.3333	0.520833	0.311795	0.58592	0.102285	0.479167	0.125354	0.149616	0.0949875	7.64557e+11	tag healthy nuclei < 50 %
BAY 12-17389	Multiplex	EUB0000634a	CC1=C(C=CC(=C1)C2=CN=C3N2N=C(C=C3NCCC(F)(F)F)OC4=C(C(=C(C=C4)OC)F)F)C(=O)NC5CC5	Chemogenomic candidate	10	24	human fibroblast	2	2.26743e+06	284	0.193662	0.806338	0.678571	0.209607	0.545852	0.244541	0.321429	0.291667	0.1875	0.1875	80.0833	0.552381	0.346171	0.555718	0.0981105	0.447619	0.11087	0.120814	0.103	231110	tag healthy nuclei < 50 %
BAY 12-17389	Multiplex	EUB0000634a	CC1=C(C=CC(=C1)C2=CN=C3N2N=C(C=C3NCCC(F)(F)F)OC4=C(C(=C(C=C4)OC)F)F)C(=O)NC5CC5	Chemogenomic candidate	10	0	HEK293T	1	0	788	0.244318	0.755682	0.120192	0.410526	0.276692	0.312782	0.879808	0.021978	0.150183	0.047619	865.667	0.13691	0.491163	0.230041	0.278796	0.86309	0.0185405	0.129798	0.0320833	#DIV/0!	tag healthy nuclei < 50 %
BAY 12-17389	Multiplex	EUB0000634a	CC1=C(C=CC(=C1)C2=CN=C3N2N=C(C=C3NCCC(F)(F)F)OC4=C(C(=C(C=C4)OC)F)F)C(=O)NC5CC5	Chemogenomic candidate	10	0	human fibroblast	1	0	159	0.163522	0.836478	0.8	0.481203	0.330827	0.18797	0.2	0	0.0625	0.015625	211.75	0.805591	0.539397	0.278942	0.181661	0.194409	0.021052	0.100182	0.0283348	#DIV/0!	tag healthy nuclei < 50 %
BAY 12-17389	Multiplex	EUB0000634a	CC1=C(C=CC(=C1)C2=CN=C3N2N=C(C=C3NCCC(F)(F)F)OC4=C(C(=C(C=C4)OC)F)F)C(=O)NC5CC5	Chemogenomic candidate	10	0	human fibroblast	2	0	101	0.39604	0.60396	0.428571	0.377049	0.508197	0.114754	0.571429	0.304348	0.434783	0	99.3333	0.557903	0.293865	0.595118	0.111016	0.442097	0.112114	0.290215	0.0427216	#DIV/0!	tag healthy nuclei < 50 %
BAY 12-17389	Multiplex	EUB0000634a	CC1=C(C=CC(=C1)C2=CN=C3N2N=C(C=C3NCCC(F)(F)F)OC4=C(C(=C(C=C4)OC)F)F)C(=O)NC5CC5	Chemogenomic candidate	10	0	human fibroblast	2	0	111	0.369369	0.630631	0.444444	0.414286	0.457143	0.128571	0.555556	0.0344828	0.241379	0	99.3333	0.557903	0.293865	0.595118	0.111016	0.442097	0.112114	0.290215	0.0427216	#DIV/0!	tag healthy nuclei < 50 %
BAY 12-17389	Multiplex	EUB0000634a	CC1=C(C=CC(=C1)C2=CN=C3N2N=C(C=C3NCCC(F)(F)F)OC4=C(C(=C(C=C4)OC)F)F)C(=O)NC5CC5	Chemogenomic candidate	10	24	human fibroblast	2	-0.928778	82	0.304878	0.695122	0.111111	0.368421	0.473684	0.157895	0.888889	0.52381	0.238095	0.190476	80.0833	0.552381	0.346171	0.555718	0.0981105	0.447619	0.11087	0.120814	0.103	231110	tag healthy nuclei < 50 %, tag tubulin effect > 50 %
BAY 12-17389	Multiplex	EUB0000634a	CC1=C(C=CC(=C1)C2=CN=C3N2N=C(C=C3NCCC(F)(F)F)OC4=C(C(=C(C=C4)OC)F)F)C(=O)NC5CC5	Chemogenomic candidate	10	24	human fibroblast	1	0.370443	211	0.156398	0.843602	0.77551	0.41573	0.308989	0.275281	0.22449	0.594595	0.5	0.121622	242.833	0.651394	0.612787	0.255064	0.132149	0.348606	0.025027	0.0173706	0.0467803	1.19614	tag healthy nuclei < 50 %, tag tubulin effect > 50 %
BAY 12-17389	Multiplex	EUB0000634a	CC1=C(C=CC(=C1)C2=CN=C3N2N=C(C=C3NCCC(F)(F)F)OC4=C(C(=C(C=C4)OC)F)F)C(=O)NC5CC5	Chemogenomic candidate	10	12	HEK293T	1	-0.877032	607	0.207578	0.792422	0.509009	0.280665	0.257796	0.461538	0.490991	0.792593	0.533333	0.177778	691.5	0.185934	0.698273	0.149796	0.151931	0.814066	0.0267306	0.0412745	0.044192	1.10218	tag healthy nuclei < 50 %, tag tubulin effect > 50 %, tag mitochondrial mass > 50 %
BAY 12-17389	Multiplex	EUB0000634a	CC1=C(C=CC(=C1)C2=CN=C3N2N=C(C=C3NCCC(F)(F)F)OC4=C(C(=C(C=C4)OC)F)F)C(=O)NC5CC5	Chemogenomic candidate	10	24	HEK293T	1	-0.225885	575	0.189565	0.810435	0.534351	0.467811	0.251073	0.281116	0.465649	0.848624	0.637615	0.0963303	838.25	0.154355	0.792279	0.137252	0.0704688	0.845645	0.0333863	0.0308318	0.0797788	1.0151	tag healthy nuclei < 50 %, tag tubulin effect > 50 %, tag mitochondrial mass > 50 %
BAY 12-17389	Multiplex	EUB0000634a	CC1=C(C=CC(=C1)C2=CN=C3N2N=C(C=C3NCCC(F)(F)F)OC4=C(C(=C(C=C4)OC)F)F)C(=O)NC5CC5	Chemogenomic candidate	10	24	U2OS	1	-0.0554578	154	0.0584416	0.941558	0.529412	0.77931	0.103448	0.117241	0.470588	0.929204	0.442478	0.389381	276.667	0.370298	0.917275	0.0423433	0.0403816	0.629702	0.31212	0.21103	0.0682442	1.0014	tag tubulin effect > 50 %
BAY 12-17389	Multiplex	EUB0000634a	CC1=C(C=CC(=C1)C2=CN=C3N2N=C(C=C3NCCC(F)(F)F)OC4=C(C(=C(C=C4)OC)F)F)C(=O)NC5CC5	Chemogenomic candidate	10	24	HEK293T	2	0.62181	1717	0.0366919	0.963308	0.0571429	0.870617	0.108222	0.0211608	0.942857	0.911806	0.0833333	0.261111	3025.33	0.160951	0.737455	0.183731	0.0788139	0.839049	0.452063	0.229554	0.0699568	0.474195	tag tubulin effect > 50 %
BAY 12-17389	Multiplex	EUB0000634a	CC1=C(C=CC(=C1)C2=CN=C3N2N=C(C=C3NCCC(F)(F)F)OC4=C(C(=C(C=C4)OC)F)F)C(=O)NC5CC5	Chemogenomic candidate	10	12	HEK293T	1	-0.0806415	639	0.13615	0.86385	0.204545	0.632246	0.128623	0.23913	0.795455	0.687679	0.117479	0.255014	691.5	0.185934	0.698273	0.149796	0.151931	0.814066	0.0267306	0.0412745	0.044192	1.10218	tag tubulin effect > 50 %
BAY 12-17389	Multiplex	EUB0000634a	CC1=C(C=CC(=C1)C2=CN=C3N2N=C(C=C3NCCC(F)(F)F)OC4=C(C(=C(C=C4)OC)F)F)C(=O)NC5CC5	Chemogenomic candidate	10	24	HEK293T	1	0.544518	704	0.0724432	0.927557	0.253968	0.805513	0.0980092	0.0964778	0.746032	0.840304	0.102662	0.249049	838.25	0.154355	0.792279	0.137252	0.0704688	0.845645	0.0333863	0.0308318	0.0797788	1.0151	tag tubulin effect > 50 %
BAY 12-17389	Multiplex	EUB0000634a	CC1=C(C=CC(=C1)C2=CN=C3N2N=C(C=C3NCCC(F)(F)F)OC4=C(C(=C(C=C4)OC)F)F)C(=O)NC5CC5	Chemogenomic candidate	10	12	HEK293T	2	0.537618	1266	0.0292259	0.970774	0.215385	0.895037	0.0520749	0.0528885	0.784615	0.875455	0.216364	0.163636	1765.83	0.0828653	0.866876	0.0909282	0.0421957	0.917135	0.0464362	0.0760075	0.0151675	0.999314	tag tubulin effect > 50 %
BAY 12-17389	Multiplex	EUB0000634a	CC1=C(C=CC(=C1)C2=CN=C3N2N=C(C=C3NCCC(F)(F)F)OC4=C(C(=C(C=C4)OC)F)F)C(=O)NC5CC5	Chemogenomic candidate	10	12	U2OS	1	-0.0222103	148	0.0405405	0.959459	0.4	0.830986	0.0985915	0.0704225	0.6	0.974576	0.220339	0.669492	199.167	0.369403	0.889153	0.0559111	0.0549359	0.630597	0.260916	0.219385	0.107163	1.00798	tag tubulin effect > 50 %, tag membrane permeabilized > 50 %
BAY 12-17389	Multiplex	EUB0000634a	CC1=C(C=CC(=C1)C2=CN=C3N2N=C(C=C3NCCC(F)(F)F)OC4=C(C(=C(C=C4)OC)F)F)C(=O)NC5CC5	Chemogenomic candidate	10	12	U2OS	2	0.217394	114	0.175439	0.824561	0.6	0.851064	0.0957447	0.0531915	0.4	0.8875	0.2375	0.5375	139.167	0.248909	0.881032	0.0702926	0.0486752	0.751091	0.279715	0.240817	0.0972624	1.01342	tag tubulin effect > 50 %, tag membrane permeabilized > 50 %
BAY 12-17389	Multiplex	EUB0000634a	CC1=C(C=CC(=C1)C2=CN=C3N2N=C(C=C3NCCC(F)(F)F)OC4=C(C(=C(C=C4)OC)F)F)C(=O)NC5CC5	Chemogenomic candidate	10	24	U2OS	1	-0.234097	167	0.0239521	0.976048	0.69697	0.650307	0.147239	0.202454	0.30303	0.990566	0.839623	0.415094	276.667	0.370298	0.917275	0.0423433	0.0403816	0.629702	0.31212	0.21103	0.0682442	1.0014	tag tubulin effect > 50 %, tag mitochondrial mass > 50 %
BAY 12-17389	Multiplex	EUB0000634a	CC1=C(C=CC(=C1)C2=CN=C3N2N=C(C=C3NCCC(F)(F)F)OC4=C(C(=C(C=C4)OC)F)F)C(=O)NC5CC5	Chemogenomic candidate	10	24	U2OS	2	0.0412582	110	0.109091	0.890909	0.5	0.755102	0.102041	0.142857	0.5	0.878378	0.594595	0.391892	178.5	0.310463	0.888541	0.0624047	0.049054	0.689537	0.288716	0.291394	0.0647451	1.00514	tag tubulin effect > 50 %, tag mitochondrial mass > 50 %
BAY 12-17389	Multiplex	EUB0000634a	CC1=C(C=CC(=C1)C2=CN=C3N2N=C(C=C3NCCC(F)(F)F)OC4=C(C(=C(C=C4)OC)F)F)C(=O)NC5CC5	Chemogenomic candidate	10	12	U2OS	1	-0.347383	164	0.0426829	0.957317	0.583333	0.732484	0.11465	0.152866	0.416667	1	0.73913	0.234783	199.167	0.369403	0.889153	0.0559111	0.0549359	0.630597	0.260916	0.219385	0.107163	1.00798	tag tubulin effect > 50 %, tag mitochondrial mass > 50 %
BAY 12-17389	Multiplex	EUB0000634a	CC1=C(C=CC(=C1)C2=CN=C3N2N=C(C=C3NCCC(F)(F)F)OC4=C(C(=C(C=C4)OC)F)F)C(=O)NC5CC5	Chemogenomic candidate	10	24	HEK293T	2	-0.0539867	1126	0.0692718	0.930728	0.310811	0.880725	0.0486641	0.0706107	0.689189	0.956663	0.611051	0.0628386	3025.33	0.160951	0.737455	0.183731	0.0788139	0.839049	0.452063	0.229554	0.0699568	0.474195	tag tubulin effect > 50 %, tag mitochondrial mass > 50 %
BAY 12-17389	Multiplex	EUB0000634a	CC1=C(C=CC(=C1)C2=CN=C3N2N=C(C=C3NCCC(F)(F)F)OC4=C(C(=C(C=C4)OC)F)F)C(=O)NC5CC5	Chemogenomic candidate	10	12	HEK293T	2	-0.234284	966	0.0559006	0.944099	0.435644	0.862939	0.0263158	0.110746	0.564356	0.958069	0.693774	0.0457433	1765.83	0.0828653	0.866876	0.0909282	0.0421957	0.917135	0.0464362	0.0760075	0.0151675	0.999314	tag tubulin effect > 50 %, tag mitochondrial mass > 50 %
BAY 12-17389	Multiplex	EUB0000634a	CC1=C(C=CC(=C1)C2=CN=C3N2N=C(C=C3NCCC(F)(F)F)OC4=C(C(=C(C=C4)OC)F)F)C(=O)NC5CC5	Chemogenomic candidate	10	24	U2OS	2	-0.212238	101	0.138614	0.861386	0.607143	0.54023	0.137931	0.321839	0.392857	1	0.957447	0.787234	178.5	0.310463	0.888541	0.0624047	0.049054	0.689537	0.288716	0.291394	0.0647451	1.00514	tag tubulin effect > 50 %, tag mitochondrial mass > 50 %, tag membrane permeabilized > 50 %
BAY 12-17389	Multiplex	EUB0000634a	CC1=C(C=CC(=C1)C2=CN=C3N2N=C(C=C3NCCC(F)(F)F)OC4=C(C(=C(C=C4)OC)F)F)C(=O)NC5CC5	Chemogenomic candidate	10	12	U2OS	2	-0.0810686	108	0.111111	0.888889	0.55	0.59375	0.197917	0.208333	0.45	1	0.929825	0.631579	139.167	0.248909	0.881032	0.0702926	0.0486752	0.751091	0.279715	0.240817	0.0972624	1.01342	tag tubulin effect > 50 %, tag mitochondrial mass > 50 %, tag membrane permeabilized > 50 %
BAY 12-17389	Multiplex	EUB0000634a	CC1=C(C=CC(=C1)C2=CN=C3N2N=C(C=C3NCCC(F)(F)F)OC4=C(C(=C(C=C4)OC)F)F)C(=O)NC5CC5	Chemogenomic candidate	10	12	human fibroblast	1	1.14967	339	0.141593	0.858407	0.540541	0.594502	0.278351	0.127148	0.459459	0.317919	0.0404624	0.156069	230.667	0.695283	0.596796	0.258529	0.144676	0.304717	0.0342007	0.0357415	0.0583164	1.23771
BAY 12-17389	Multiplex	EUB0000634a	CC1=C(C=CC(=C1)C2=CN=C3N2N=C(C=C3NCCC(F)(F)F)OC4=C(C(=C(C=C4)OC)F)F)C(=O)NC5CC5	Chemogenomic candidate	10	0	U2OS	2	0	87	0.172414	0.827586	0.75	0.833333	0.111111	0.0555556	0.25	0.266667	0.266667	0.15	99.3333	#DIV/0!	0.877466	0.0854137	0.0371199	#DIV/0!	0.27287	0.183282	0.0858335	0
BAY 12-17389	Multiplex	EUB0000634a	CC1=C(C=CC(=C1)C2=CN=C3N2N=C(C=C3NCCC(F)(F)F)OC4=C(C(=C(C=C4)OC)F)F)C(=O)NC5CC5	Chemogenomic candidate	10	0	U2OS	1	0	141	0.0425532	0.957447	0.6	0.881481	0.0814815	0.037037	0.4	0.260504	0.0504202	0.12605	156.5	0.597808	0.882455	0.0611652	0.0563801	0.402192	0.271242	0.126392	0.10096	0
BAY 12-17389	Multiplex	EUB0000634a	CC1=C(C=CC(=C1)C2=CN=C3N2N=C(C=C3NCCC(F)(F)F)OC4=C(C(=C(C=C4)OC)F)F)C(=O)NC5CC5	Chemogenomic candidate	10	24	human fibroblast	1	0.85578	319	0.134796	0.865204	0.486486	0.634058	0.231884	0.134058	0.513514	0.274286	0.0914286	0.0857143	242.833	0.651394	0.612787	0.255064	0.132149	0.348606	0.025027	0.0173706	0.0467803	1.19614
BAY 12-17389	Multiplex	EUB0000634a	CC1=C(C=CC(=C1)C2=CN=C3N2N=C(C=C3NCCC(F)(F)F)OC4=C(C(=C(C=C4)OC)F)F)C(=O)NC5CC5	Chemogenomic candidate	10	0	U2OS	1	0	157	0.044586	0.955414	0.333333	0.9	0.06	0.04	0.666667	0.244444	0.118519	0.0814815	156.5	0.597808	0.882455	0.0611652	0.0563801	0.402192	0.271242	0.126392	0.10096	0
BAY 12-17389	Multiplex	EUB0000634a	CC1=C(C=CC(=C1)C2=CN=C3N2N=C(C=C3NCCC(F)(F)F)OC4=C(C(=C(C=C4)OC)F)F)C(=O)NC5CC5	Chemogenomic candidate	10	0	human fibroblast	1	0	189	0.121693	0.878307	0.666667	0.512048	0.307229	0.180723	0.333333	0.0235294	0.0823529	0.0470588	211.75	0.805591	0.539397	0.278942	0.181661	0.194409	0.021052	0.100182	0.0283348	#DIV/0!
BAY 12-17389	Multiplex	EUB0000634a	CC1=C(C=CC(=C1)C2=CN=C3N2N=C(C=C3NCCC(F)(F)F)OC4=C(C(=C(C=C4)OC)F)F)C(=O)NC5CC5	Chemogenomic candidate	10	0	U2OS	2	0	101	0.227723	0.772277	0.75	0.910256	0.0384615	0.0512821	0.25	0.295775	0.239437	0.0422535	99.3333	#DIV/0!	0.877466	0.0854137	0.0371199	#DIV/0!	0.27287	0.183282	0.0858335	0
BAY 12-17389	Multiplex	EUB0000634a	CC1=C(C=CC(=C1)C2=CN=C3N2N=C(C=C3NCCC(F)(F)F)OC4=C(C(=C(C=C4)OC)F)F)C(=O)NC5CC5	Chemogenomic candidate	10	0	HEK293T	1	0	912	0.192799	0.807201	0.12234	0.516547	0.21295	0.270504	0.87766	0.00557103	0.100279	0.0250696	865.667	0.13691	0.491163	0.230041	0.278796	0.86309	0.0185405	0.129798	0.0320833	#DIV/0!
BAY 12-17389	Multiplex	EUB0000634a	CC1=C(C=CC(=C1)C2=CN=C3N2N=C(C=C3NCCC(F)(F)F)OC4=C(C(=C(C=C4)OC)F)F)C(=O)NC5CC5	Chemogenomic candidate	10	0	HEK293T	2	0	1015	0.0256158	0.974384	0.123656	0.763397	0.0485339	0.188069	0.876344	0.00529801	0.331126	0.0013245	1080.25	0.142406	0.776982	0.0533037	0.169714	0.857594	0.00453037	0.323128	0.00113292	#DIV/0!
BAY 12-17389	Multiplex	EUB0000634a	CC1=C(C=CC(=C1)C2=CN=C3N2N=C(C=C3NCCC(F)(F)F)OC4=C(C(=C(C=C4)OC)F)F)C(=O)NC5CC5	Chemogenomic candidate	10	0	HEK293T	2	0	1269	0.0260047	0.973995	0.203488	0.804207	0.0566343	0.139159	0.796512	0.00503018	0.343058	0.00100604	1080.25	0.142406	0.776982	0.0533037	0.169714	0.857594	0.00453037	0.323128	0.00113292	#DIV/0!
BAY-070	Multiplex	EUB0000748a	CN1C2=C(C=CC=C2)N=C1C3=CSC(C4CCN(CC4)CC5=NC6N=CC=CC6N5)=N3	Chemogenomic candidate	10	12	human fibroblast	2	0	77	0.337662	0.662338	0.166667	0.215686	0.666667	0.117647	0.833333	0.0909091	0.272727	0.363636	84.3333	0.520833	0.311795	0.58592	0.102285	0.479167	0.125354	0.149616	0.0949875	7.64557e+11	tag healthy nuclei < 50 %
BAY-070	Multiplex	EUB0000748a	CN1C2=C(C=CC=C2)N=C1C3=CSC(C4CCN(CC4)CC5=NC6N=CC=CC6N5)=N3	Chemogenomic candidate	10	24	human fibroblast	2	-0.937209	74	0.418919	0.581081	0	0.232558	0.651163	0.116279	1	0.4	0.2	0.3	80.0833	0.552381	0.346171	0.555718	0.0981105	0.447619	0.11087	0.120814	0.103	231110	tag healthy nuclei < 50 %
BAY-070	Multiplex	EUB0000748a	CN1C2=C(C=CC=C2)N=C1C3=CSC(C4CCN(CC4)CC5=NC6N=CC=CC6N5)=N3	Chemogenomic candidate	10	12	human fibroblast	2	14.0875	75	0.373333	0.626667	0.8	0.361702	0.531915	0.106383	0.2	0.411765	0	0.294118	84.3333	0.520833	0.311795	0.58592	0.102285	0.479167	0.125354	0.149616	0.0949875	7.64557e+11	tag healthy nuclei < 50 %
BAY-070	Multiplex	EUB0000748a	CN1C2=C(C=CC=C2)N=C1C3=CSC(C4CCN(CC4)CC5=NC6N=CC=CC6N5)=N3	Chemogenomic candidate	10	0	human fibroblast	2	0	72	0.458333	0.541667	0.5	0.282051	0.564103	0.153846	0.5	0	0.0909091	0.272727	99.3333	0.557903	0.293865	0.595118	0.111016	0.442097	0.112114	0.290215	0.0427216	#DIV/0!	tag healthy nuclei < 50 %
BAY-070	Multiplex	EUB0000748a	CN1C2=C(C=CC=C2)N=C1C3=CSC(C4CCN(CC4)CC5=NC6N=CC=CC6N5)=N3	Chemogenomic candidate	10	24	human fibroblast	2	0	84	0.297619	0.702381	0.571429	0.305085	0.576271	0.118644	0.428571	0.5	0.0555556	0.222222	80.0833	0.552381	0.346171	0.555718	0.0981105	0.447619	0.11087	0.120814	0.103	231110	tag healthy nuclei < 50 %
BAY-070	Multiplex	EUB0000748a	CN1C2=C(C=CC=C2)N=C1C3=CSC(C4CCN(CC4)CC5=NC6N=CC=CC6N5)=N3	Chemogenomic candidate	10	0	human fibroblast	1	0	165	0.139394	0.860606	0.888889	0.492958	0.316901	0.190141	0.111111	0.0714286	0.128571	0.0571429	211.75	0.805591	0.539397	0.278942	0.181661	0.194409	0.021052	0.100182	0.0283348	#DIV/0!	tag healthy nuclei < 50 %
BAY-070	Multiplex	EUB0000748a	CN1C2=C(C=CC=C2)N=C1C3=CSC(C4CCN(CC4)CC5=NC6N=CC=CC6N5)=N3	Chemogenomic candidate	10	0	human fibroblast	2	0	91	0.362637	0.637363	0.909091	0.310345	0.5	0.189655	0.0909091	0.0555556	0.333333	0.0555556	99.3333	0.557903	0.293865	0.595118	0.111016	0.442097	0.112114	0.290215	0.0427216	#DIV/0!	tag healthy nuclei < 50 %
BAY-070	Multiplex	EUB0000748a	CN1C2=C(C=CC=C2)N=C1C3=CSC(C4CCN(CC4)CC5=NC6N=CC=CC6N5)=N3	Chemogenomic candidate	10	12	HEK293T	1	-0.185627	591	0.167513	0.832487	0.195312	0.48374	0.256098	0.260163	0.804688	0.0714286	0.0504202	0.0504202	691.5	0.185934	0.698273	0.149796	0.151931	0.814066	0.0267306	0.0412745	0.044192	1.10218	tag healthy nuclei < 50 %
BAY-070	Multiplex	EUB0000748a	CN1C2=C(C=CC=C2)N=C1C3=CSC(C4CCN(CC4)CC5=NC6N=CC=CC6N5)=N3	Chemogenomic candidate	10	0	HEK293T	1	0	868	0.23028	0.76972	0.176101	0.421488	0.315702	0.26281	0.823899	0.0352941	0.152941	0.0431373	865.667	0.13691	0.491163	0.230041	0.278796	0.86309	0.0185405	0.129798	0.0320833	#DIV/0!	tag healthy nuclei < 50 %
BAY-070	Multiplex	EUB0000748a	CN1C2=C(C=CC=C2)N=C1C3=CSC(C4CCN(CC4)CC5=NC6N=CC=CC6N5)=N3	Chemogenomic candidate	10	12	U2OS	2	0.523291	96	0.125	0.875	0	0.845238	0.130952	0.0238095	1	0.197183	0.211268	0.197183	139.167	0.248909	0.881032	0.0702926	0.0486752	0.751091	0.279715	0.240817	0.0972624	1.01342
BAY-070	Multiplex	EUB0000748a	CN1C2=C(C=CC=C2)N=C1C3=CSC(C4CCN(CC4)CC5=NC6N=CC=CC6N5)=N3	Chemogenomic candidate	10	24	U2OS	2	0.494823	108	0.12037	0.87963	0.2	0.873684	0.0736842	0.0526316	0.8	0.192771	0.253012	0.168675	178.5	0.310463	0.888541	0.0624047	0.049054	0.689537	0.288716	0.291394	0.0647451	1.00514
BAY-070	Multiplex	EUB0000748a	CN1C2=C(C=CC=C2)N=C1C3=CSC(C4CCN(CC4)CC5=NC6N=CC=CC6N5)=N3	Chemogenomic candidate	10	12	human fibroblast	1	1.15519	238	0.117647	0.882353	0.666667	0.538095	0.304762	0.157143	0.333333	0.150442	0.0442478	0.123894	230.667	0.695283	0.596796	0.258529	0.144676	0.304717	0.0342007	0.0357415	0.0583164	1.23771
BAY-070	Multiplex	EUB0000748a	CN1C2=C(C=CC=C2)N=C1C3=CSC(C4CCN(CC4)CC5=NC6N=CC=CC6N5)=N3	Chemogenomic candidate	10	24	U2OS	1	0.473712	265	0.0377358	0.962264	0.5	0.886275	0.0509804	0.0627451	0.5	0.159292	0.172566	0.106195	276.667	0.370298	0.917275	0.0423433	0.0403816	0.629702	0.31212	0.21103	0.0682442	1.0014
BAY-070	Multiplex	EUB0000748a	CN1C2=C(C=CC=C2)N=C1C3=CSC(C4CCN(CC4)CC5=NC6N=CC=CC6N5)=N3	Chemogenomic candidate	10	0	U2OS	1	0	153	0.0522876	0.947712	0.333333	0.889655	0.0689655	0.0413793	0.666667	0.248062	0.139535	0.100775	156.5	0.597808	0.882455	0.0611652	0.0563801	0.402192	0.271242	0.126392	0.10096	0
BAY-070	Multiplex	EUB0000748a	CN1C2=C(C=CC=C2)N=C1C3=CSC(C4CCN(CC4)CC5=NC6N=CC=CC6N5)=N3	Chemogenomic candidate	10	24	human fibroblast	1	1.22715	222	0.108108	0.891892	0.516129	0.611111	0.232323	0.156566	0.483871	0.181818	0.0826446	0.0991736	242.833	0.651394	0.612787	0.255064	0.132149	0.348606	0.025027	0.0173706	0.0467803	1.19614
BAY-070	Multiplex	EUB0000748a	CN1C2=C(C=CC=C2)N=C1C3=CSC(C4CCN(CC4)CC5=NC6N=CC=CC6N5)=N3	Chemogenomic candidate	10	12	human fibroblast	1	-0.057057	282	0.141844	0.858156	0.864865	0.582645	0.264463	0.152893	0.135135	0.0283688	0.0070922	0.0921986	230.667	0.695283	0.596796	0.258529	0.144676	0.304717	0.0342007	0.0357415	0.0583164	1.23771
BAY-070	Multiplex	EUB0000748a	CN1C2=C(C=CC=C2)N=C1C3=CSC(C4CCN(CC4)CC5=NC6N=CC=CC6N5)=N3	Chemogenomic candidate	10	0	U2OS	2	0	65	0.107692	0.892308	#DIV/0!	0.948276	0.0517241	0	#DIV/0!	0.254545	0.2	0.0909091	99.3333	#DIV/0!	0.877466	0.0854137	0.0371199	#DIV/0!	0.27287	0.183282	0.0858335	0
BAY-070	Multiplex	EUB0000748a	CN1C2=C(C=CC=C2)N=C1C3=CSC(C4CCN(CC4)CC5=NC6N=CC=CC6N5)=N3	Chemogenomic candidate	10	12	U2OS	2	0.56837	145	0.131034	0.868966	0.333333	0.896825	0.0793651	0.0238095	0.666667	0.345133	0.256637	0.0884956	139.167	0.248909	0.881032	0.0702926	0.0486752	0.751091	0.279715	0.240817	0.0972624	1.01342
BAY-070	Multiplex	EUB0000748a	CN1C2=C(C=CC=C2)N=C1C3=CSC(C4CCN(CC4)CC5=NC6N=CC=CC6N5)=N3	Chemogenomic candidate	10	24	human fibroblast	1	0.604751	285	0.133333	0.866667	0.625	0.672065	0.165992	0.161943	0.375	0.0240964	0.0180723	0.0843373	242.833	0.651394	0.612787	0.255064	0.132149	0.348606	0.025027	0.0173706	0.0467803	1.19614
BAY-070	Multiplex	EUB0000748a	CN1C2=C(C=CC=C2)N=C1C3=CSC(C4CCN(CC4)CC5=NC6N=CC=CC6N5)=N3	Chemogenomic candidate	10	12	U2OS	1	0.686782	183	0.0546448	0.945355	0.0833333	0.907514	0.0231214	0.0693642	0.916667	0.22293	0.210191	0.0828025	199.167	0.369403	0.889153	0.0559111	0.0549359	0.630597	0.260916	0.219385	0.107163	1.00798
BAY-070	Multiplex	EUB0000748a	CN1C2=C(C=CC=C2)N=C1C3=CSC(C4CCN(CC4)CC5=NC6N=CC=CC6N5)=N3	Chemogenomic candidate	10	0	U2OS	2	0	114	0.140351	0.859649	0	0.877551	0.112245	0.0102041	1	0.430233	0.209302	0.0813953	99.3333	#DIV/0!	0.877466	0.0854137	0.0371199	#DIV/0!	0.27287	0.183282	0.0858335	0
BAY-070	Multiplex	EUB0000748a	CN1C2=C(C=CC=C2)N=C1C3=CSC(C4CCN(CC4)CC5=NC6N=CC=CC6N5)=N3	Chemogenomic candidate	10	12	U2OS	1	0.271178	214	0.0373832	0.962617	0.291667	0.84466	0.038835	0.116505	0.708333	0.0804598	0.109195	0.0689655	199.167	0.369403	0.889153	0.0559111	0.0549359	0.630597	0.260916	0.219385	0.107163	1.00798
BAY-070	Multiplex	EUB0000748a	CN1C2=C(C=CC=C2)N=C1C3=CSC(C4CCN(CC4)CC5=NC6N=CC=CC6N5)=N3	Chemogenomic candidate	10	24	HEK293T	1	-0.192728	694	0.092219	0.907781	0.159509	0.636508	0.104762	0.25873	0.840491	0.199501	0.074813	0.0623441	838.25	0.154355	0.792279	0.137252	0.0704688	0.845645	0.0333863	0.0308318	0.0797788	1.0151
BAY-070	Multiplex	EUB0000748a	CN1C2=C(C=CC=C2)N=C1C3=CSC(C4CCN(CC4)CC5=NC6N=CC=CC6N5)=N3	Chemogenomic candidate	10	24	HEK293T	1	0.317911	578	0.103806	0.896194	0.240964	0.627413	0.212355	0.160232	0.759036	0.0676923	0.04	0.0615385	838.25	0.154355	0.792279	0.137252	0.0704688	0.845645	0.0333863	0.0308318	0.0797788	1.0151
BAY-070	Multiplex	EUB0000748a	CN1C2=C(C=CC=C2)N=C1C3=CSC(C4CCN(CC4)CC5=NC6N=CC=CC6N5)=N3	Chemogenomic candidate	10	24	HEK293T	2	0.715018	2202	0.0258856	0.974114	0.0980392	0.835431	0.140793	0.0237762	0.901961	0.0898438	0.0195312	0.0597098	3025.33	0.160951	0.737455	0.183731	0.0788139	0.839049	0.452063	0.229554	0.0699568	0.474195
BAY-070	Multiplex	EUB0000748a	CN1C2=C(C=CC=C2)N=C1C3=CSC(C4CCN(CC4)CC5=NC6N=CC=CC6N5)=N3	Chemogenomic candidate	10	0	U2OS	1	0	181	0.0331492	0.966851	0.666667	0.908571	0.04	0.0514286	0.333333	0.169811	0.081761	0.0566038	156.5	0.597808	0.882455	0.0611652	0.0563801	0.402192	0.271242	0.126392	0.10096	0
BAY-070	Multiplex	EUB0000748a	CN1C2=C(C=CC=C2)N=C1C3=CSC(C4CCN(CC4)CC5=NC6N=CC=CC6N5)=N3	Chemogenomic candidate	10	24	HEK293T	2	0.262975	1248	0.0592949	0.940705	0.179775	0.87138	0.0528109	0.0758092	0.820225	0.346041	0.110459	0.054741	3025.33	0.160951	0.737455	0.183731	0.0788139	0.839049	0.452063	0.229554	0.0699568	0.474195
BAY-070	Multiplex	EUB0000748a	CN1C2=C(C=CC=C2)N=C1C3=CSC(C4CCN(CC4)CC5=NC6N=CC=CC6N5)=N3	Chemogenomic candidate	10	24	U2OS	2	0.688279	180	0.0388889	0.961111	0.333333	0.849711	0.0635838	0.0867052	0.666667	0.394558	0.272109	0.0544218	178.5	0.310463	0.888541	0.0624047	0.049054	0.689537	0.288716	0.291394	0.0647451	1.00514
BAY-070	Multiplex	EUB0000748a	CN1C2=C(C=CC=C2)N=C1C3=CSC(C4CCN(CC4)CC5=NC6N=CC=CC6N5)=N3	Chemogenomic candidate	10	24	U2OS	1	0.928488	259	0.027027	0.972973	0.4	0.928571	0.031746	0.0396825	0.6	0.307692	0.149573	0.0512821	276.667	0.370298	0.917275	0.0423433	0.0403816	0.629702	0.31212	0.21103	0.0682442	1.0014
BAY-070	Multiplex	EUB0000748a	CN1C2=C(C=CC=C2)N=C1C3=CSC(C4CCN(CC4)CC5=NC6N=CC=CC6N5)=N3	Chemogenomic candidate	10	12	HEK293T	1	-0.557576	756	0.140212	0.859788	0.146119	0.566154	0.0969231	0.336923	0.853881	0.100543	0.0869565	0.0380435	691.5	0.185934	0.698273	0.149796	0.151931	0.814066	0.0267306	0.0412745	0.044192	1.10218
BAY-070	Multiplex	EUB0000748a	CN1C2=C(C=CC=C2)N=C1C3=CSC(C4CCN(CC4)CC5=NC6N=CC=CC6N5)=N3	Chemogenomic candidate	10	0	human fibroblast	1	0	230	0.104348	0.895652	0.833333	0.621359	0.203883	0.174757	0.166667	0.0234375	0.09375	0.0234375	211.75	0.805591	0.539397	0.278942	0.181661	0.194409	0.021052	0.100182	0.0283348	#DIV/0!
BAY-070	Multiplex	EUB0000748a	CN1C2=C(C=CC=C2)N=C1C3=CSC(C4CCN(CC4)CC5=NC6N=CC=CC6N5)=N3	Chemogenomic candidate	10	12	HEK293T	2	0.129206	1063	0.0517404	0.94826	0.154412	0.826389	0.0386905	0.134921	0.845588	0.147659	0.213685	0.0192077	1765.83	0.0828653	0.866876	0.0909282	0.0421957	0.917135	0.0464362	0.0760075	0.0151675	0.999314
BAY-070	Multiplex	EUB0000748a	CN1C2=C(C=CC=C2)N=C1C3=CSC(C4CCN(CC4)CC5=NC6N=CC=CC6N5)=N3	Chemogenomic candidate	10	12	HEK293T	2	0.525914	1470	0.029932	0.970068	0.104478	0.884993	0.0680224	0.0469846	0.895522	0.0538827	0.0839937	0.0134707	1765.83	0.0828653	0.866876	0.0909282	0.0421957	0.917135	0.0464362	0.0760075	0.0151675	0.999314
BAY-070	Multiplex	EUB0000748a	CN1C2=C(C=CC=C2)N=C1C3=CSC(C4CCN(CC4)CC5=NC6N=CC=CC6N5)=N3	Chemogenomic candidate	10	0	HEK293T	1	0	816	0.143908	0.856092	0.168269	0.593865	0.15092	0.255215	0.831731	0.0206612	0.13843	0.0103306	865.667	0.13691	0.491163	0.230041	0.278796	0.86309	0.0185405	0.129798	0.0320833	#DIV/0!
BAY-070	Multiplex	EUB0000748a	CN1C2=C(C=CC=C2)N=C1C3=CSC(C4CCN(CC4)CC5=NC6N=CC=CC6N5)=N3	Chemogenomic candidate	10	0	HEK293T	2	0	1032	0.0319767	0.968023	0.132275	0.74975	0.0610611	0.189189	0.867725	0	0.283044	0.00267023	1080.25	0.142406	0.776982	0.0533037	0.169714	0.857594	0.00453037	0.323128	0.00113292	#DIV/0!
BAY-070	Multiplex	EUB0000748a	CN1C2=C(C=CC=C2)N=C1C3=CSC(C4CCN(CC4)CC5=NC6N=CC=CC6N5)=N3	Chemogenomic candidate	10	0	HEK293T	2	0	1125	0.0204444	0.979556	0.0755814	0.791289	0.0526316	0.15608	0.924419	0.00114679	0.240826	0	1080.25	0.142406	0.776982	0.0533037	0.169714	0.857594	0.00453037	0.323128	0.00113292	#DIV/0!
BAY1125976	Multiplex	EUB0000637a	C1CC(C1)(C2=CC=C(C=C2)C3=C(N4C(=N3)C=CC(=N4)C(=O)N)C5=CC=CC=C5)N	Chemogenomic candidate	1	24	human fibroblast	2	4.8161	128	0.398438	0.601562	0.636364	0.220779	0.636364	0.142857	0.363636	0.470588	0.117647	0.176471	80.0833	0.552381	0.346171	0.555718	0.0981105	0.447619	0.11087	0.120814	0.103	231110	tag healthy nuclei < 50 %
BAY1125976	Multiplex	EUB0000637a	C1CC(C1)(C2=CC=C(C=C2)C3=C(N4C(=N3)C=CC(=N4)C(=O)N)C5=CC=CC=C5)N	Chemogenomic candidate	1	12	human fibroblast	1	0.89117	587	0.385009	0.614991	0.723404	0.33241	0.537396	0.130194	0.276596	0.291667	0.00833333	0.116667	230.667	0.695283	0.596796	0.258529	0.144676	0.304717	0.0342007	0.0357415	0.0583164	1.23771	tag healthy nuclei < 50 %
BAY1125976	Multiplex	EUB0000637a	C1CC(C1)(C2=CC=C(C=C2)C3=C(N4C(=N3)C=CC(=N4)C(=O)N)C5=CC=CC=C5)N	Chemogenomic candidate	10	12	human fibroblast	2	1.29025e+09	84	0.404762	0.595238	0.2	0.36	0.54	0.1	0.8	0.0555556	0	0.111111	84.3333	0.520833	0.311795	0.58592	0.102285	0.479167	0.125354	0.149616	0.0949875	7.64557e+11	tag healthy nuclei < 50 %
BAY1125976	Multiplex	EUB0000637a	C1CC(C1)(C2=CC=C(C=C2)C3=C(N4C(=N3)C=CC(=N4)C(=O)N)C5=CC=CC=C5)N	Chemogenomic candidate	10	0	human fibroblast	2	0	91	0.32967	0.67033	0.25	0.459016	0.47541	0.0655738	0.75	0.107143	0.214286	0.107143	99.3333	0.557903	0.293865	0.595118	0.111016	0.442097	0.112114	0.290215	0.0427216	#DIV/0!	tag healthy nuclei < 50 %
BAY1125976	Multiplex	EUB0000637a	C1CC(C1)(C2=CC=C(C=C2)C3=C(N4C(=N3)C=CC(=N4)C(=O)N)C5=CC=CC=C5)N	Chemogenomic candidate	1	24	human fibroblast	1	0.623278	564	0.414894	0.585106	0.787879	0.363636	0.536364	0.1	0.212121	0.208333	0.025	0.1	242.833	0.651394	0.612787	0.255064	0.132149	0.348606	0.025027	0.0173706	0.0467803	1.19614	tag healthy nuclei < 50 %
BAY1125976	Multiplex	EUB0000637a	C1CC(C1)(C2=CC=C(C=C2)C3=C(N4C(=N3)C=CC(=N4)C(=O)N)C5=CC=CC=C5)N	Chemogenomic candidate	1	0	human fibroblast	2	0	77	0.285714	0.714286	0.5	0.290909	0.563636	0.145455	0.5	0	0.0625	0.0625	99.3333	0.557903	0.293865	0.595118	0.111016	0.442097	0.112114	0.290215	0.0427216	#DIV/0!	tag healthy nuclei < 50 %
BAY1125976	Multiplex	EUB0000637a	C1CC(C1)(C2=CC=C(C=C2)C3=C(N4C(=N3)C=CC(=N4)C(=O)N)C5=CC=CC=C5)N	Chemogenomic candidate	10	24	human fibroblast	2	-0.999765	80	0.3625	0.6375	0.285714	0.411765	0.45098	0.137255	0.714286	0	0.047619	0.047619	80.0833	0.552381	0.346171	0.555718	0.0981105	0.447619	0.11087	0.120814	0.103	231110	tag healthy nuclei < 50 %
BAY1125976	Multiplex	EUB0000637a	C1CC(C1)(C2=CC=C(C=C2)C3=C(N4C(=N3)C=CC(=N4)C(=O)N)C5=CC=CC=C5)N	Chemogenomic candidate	10	0	HEK293T	1	0	876	0.210063	0.789937	0.111765	0.47293	0.256369	0.270701	0.888235	0.010101	0.138047	0.03367	865.667	0.13691	0.491163	0.230041	0.278796	0.86309	0.0185405	0.129798	0.0320833	#DIV/0!	tag healthy nuclei < 50 %
BAY1125976	Multiplex	EUB0000637a	C1CC(C1)(C2=CC=C(C=C2)C3=C(N4C(=N3)C=CC(=N4)C(=O)N)C5=CC=CC=C5)N	Chemogenomic candidate	1	12	human fibroblast	2	-0.999975	131	0.51145	0.48855	0.875	0.3125	0.5625	0.125	0.125	0.25	0.15	0.3	84.3333	0.520833	0.311795	0.58592	0.102285	0.479167	0.125354	0.149616	0.0949875	7.64557e+11	tag Hoechst High Intensity, tag healthy nuclei < 50 %
BAY1125976	Multiplex	EUB0000637a	C1CC(C1)(C2=CC=C(C=C2)C3=C(N4C(=N3)C=CC(=N4)C(=O)N)C5=CC=CC=C5)N	Chemogenomic candidate	1	12	U2OS	1	0.55353	239	0.0669456	0.933054	0.529412	0.793722	0.130045	0.0762332	0.470588	0.463277	0.19209	0.536723	199.167	0.369403	0.889153	0.0559111	0.0549359	0.630597	0.260916	0.219385	0.107163	1.00798	tag membrane permeabilized > 50 %
BAY1125976	Multiplex	EUB0000637a	C1CC(C1)(C2=CC=C(C=C2)C3=C(N4C(=N3)C=CC(=N4)C(=O)N)C5=CC=CC=C5)N	Chemogenomic candidate	1	12	U2OS	2	0.327438	109	0.12844	0.87156	0.428571	0.8	0.126316	0.0736842	0.571429	0.355263	0.197368	0.434211	139.167	0.248909	0.881032	0.0702926	0.0486752	0.751091	0.279715	0.240817	0.0972624	1.01342
BAY1125976	Multiplex	EUB0000637a	C1CC(C1)(C2=CC=C(C=C2)C3=C(N4C(=N3)C=CC(=N4)C(=O)N)C5=CC=CC=C5)N	Chemogenomic candidate	1	24	U2OS	1	0.350659	273	0.0586081	0.941392	0.423077	0.766537	0.132296	0.101167	0.576923	0.233503	0.187817	0.263959	276.667	0.370298	0.917275	0.0423433	0.0403816	0.629702	0.31212	0.21103	0.0682442	1.0014
BAY1125976	Multiplex	EUB0000637a	C1CC(C1)(C2=CC=C(C=C2)C3=C(N4C(=N3)C=CC(=N4)C(=O)N)C5=CC=CC=C5)N	Chemogenomic candidate	10	12	U2OS	1	1.21325	210	0.0428571	0.957143	0.666667	0.925373	0.0597015	0.0149254	0.333333	0.274194	0.241935	0.112903	199.167	0.369403	0.889153	0.0559111	0.0549359	0.630597	0.260916	0.219385	0.107163	1.00798
BAY1125976	Multiplex	EUB0000637a	C1CC(C1)(C2=CC=C(C=C2)C3=C(N4C(=N3)C=CC(=N4)C(=O)N)C5=CC=CC=C5)N	Chemogenomic candidate	1	12	HEK293T	1	0.0314049	688	0.167151	0.832849	0.227723	0.675393	0.148342	0.176265	0.772277	0.260982	0.126615	0.108527	691.5	0.185934	0.698273	0.149796	0.151931	0.814066	0.0267306	0.0412745	0.044192	1.10218
BAY1125976	Multiplex	EUB0000637a	C1CC(C1)(C2=CC=C(C=C2)C3=C(N4C(=N3)C=CC(=N4)C(=O)N)C5=CC=CC=C5)N	Chemogenomic candidate	10	24	HEK293T	1	0.730993	699	0.110157	0.889843	0.264151	0.773312	0.141479	0.085209	0.735849	0.0810811	0.04158	0.108108	838.25	0.154355	0.792279	0.137252	0.0704688	0.845645	0.0333863	0.0308318	0.0797788	1.0151
BAY1125976	Multiplex	EUB0000637a	C1CC(C1)(C2=CC=C(C=C2)C3=C(N4C(=N3)C=CC(=N4)C(=O)N)C5=CC=CC=C5)N	Chemogenomic candidate	1	24	U2OS	2	0.364928	124	0.0806452	0.919355	0.444444	0.77193	0.149123	0.0789474	0.555556	0.136364	0.204545	0.102273	178.5	0.310463	0.888541	0.0624047	0.049054	0.689537	0.288716	0.291394	0.0647451	1.00514
BAY1125976	Multiplex	EUB0000637a	C1CC(C1)(C2=CC=C(C=C2)C3=C(N4C(=N3)C=CC(=N4)C(=O)N)C5=CC=CC=C5)N	Chemogenomic candidate	1	24	HEK293T	2	0.684182	1875	0.0469333	0.953067	0.102941	0.766648	0.195299	0.0380526	0.897059	0.424818	0.0554745	0.10219	3025.33	0.160951	0.737455	0.183731	0.0788139	0.839049	0.452063	0.229554	0.0699568	0.474195
BAY1125976	Multiplex	EUB0000637a	C1CC(C1)(C2=CC=C(C=C2)C3=C(N4C(=N3)C=CC(=N4)C(=O)N)C5=CC=CC=C5)N	Chemogenomic candidate	1	0	U2OS	1	0	183	0.0546448	0.945355	0.769231	0.867052	0.0578035	0.0751445	0.230769	0.193333	0.126667	0.1	156.5	0.597808	0.882455	0.0611652	0.0563801	0.402192	0.271242	0.126392	0.10096	0
BAY1125976	Multiplex	EUB0000637a	C1CC(C1)(C2=CC=C(C=C2)C3=C(N4C(=N3)C=CC(=N4)C(=O)N)C5=CC=CC=C5)N	Chemogenomic candidate	1	24	HEK293T	1	0.186197	691	0.153401	0.846599	0.327869	0.760684	0.135043	0.104274	0.672131	0.442697	0.0921348	0.0988764	838.25	0.154355	0.792279	0.137252	0.0704688	0.845645	0.0333863	0.0308318	0.0797788	1.0151
BAY1125976	Multiplex	EUB0000637a	C1CC(C1)(C2=CC=C(C=C2)C3=C(N4C(=N3)C=CC(=N4)C(=O)N)C5=CC=CC=C5)N	Chemogenomic candidate	10	0	U2OS	2	0	125	0.136	0.864	0.375	0.87037	0.0555556	0.0740741	0.625	0.234043	0.117021	0.0957447	99.3333	#DIV/0!	0.877466	0.0854137	0.0371199	#DIV/0!	0.27287	0.183282	0.0858335	0
BAY1125976	Multiplex	EUB0000637a	C1CC(C1)(C2=CC=C(C=C2)C3=C(N4C(=N3)C=CC(=N4)C(=O)N)C5=CC=CC=C5)N	Chemogenomic candidate	10	24	U2OS	2	0.845426	213	0.0516432	0.948357	0.0769231	0.871287	0.0643564	0.0643564	0.923077	0.25	0.289773	0.0909091	178.5	0.310463	0.888541	0.0624047	0.049054	0.689537	0.288716	0.291394	0.0647451	1.00514
BAY1125976	Multiplex	EUB0000637a	C1CC(C1)(C2=CC=C(C=C2)C3=C(N4C(=N3)C=CC(=N4)C(=O)N)C5=CC=CC=C5)N	Chemogenomic candidate	10	0	U2OS	1	0	167	0.0479042	0.952096	0.571429	0.867925	0.0880503	0.0440252	0.428571	0.297101	0.130435	0.0869565	156.5	0.597808	0.882455	0.0611652	0.0563801	0.402192	0.271242	0.126392	0.10096	0
BAY1125976	Multiplex	EUB0000637a	C1CC(C1)(C2=CC=C(C=C2)C3=C(N4C(=N3)C=CC(=N4)C(=O)N)C5=CC=CC=C5)N	Chemogenomic candidate	10	24	U2OS	1	0.689284	258	0.0116279	0.988372	0.333333	0.870588	0.0941176	0.0352941	0.666667	0.301802	0.315315	0.0855856	276.667	0.370298	0.917275	0.0423433	0.0403816	0.629702	0.31212	0.21103	0.0682442	1.0014
BAY1125976	Multiplex	EUB0000637a	C1CC(C1)(C2=CC=C(C=C2)C3=C(N4C(=N3)C=CC(=N4)C(=O)N)C5=CC=CC=C5)N	Chemogenomic candidate	1	12	HEK293T	2	0.587001	1223	0.0474244	0.952576	0.105882	0.878112	0.048927	0.0729614	0.894118	0.383187	0.173021	0.0772239	1765.83	0.0828653	0.866876	0.0909282	0.0421957	0.917135	0.0464362	0.0760075	0.0151675	0.999314
BAY1125976	Multiplex	EUB0000637a	C1CC(C1)(C2=CC=C(C=C2)C3=C(N4C(=N3)C=CC(=N4)C(=O)N)C5=CC=CC=C5)N	Chemogenomic candidate	10	24	human fibroblast	1	1.61717	192	0.151042	0.848958	0.52	0.656442	0.190184	0.153374	0.48	0.0373832	0.0280374	0.0747664	242.833	0.651394	0.612787	0.255064	0.132149	0.348606	0.025027	0.0173706	0.0467803	1.19614
BAY1125976	Multiplex	EUB0000637a	C1CC(C1)(C2=CC=C(C=C2)C3=C(N4C(=N3)C=CC(=N4)C(=O)N)C5=CC=CC=C5)N	Chemogenomic candidate	1	0	U2OS	2	0	83	0.168675	0.831325	0.5	0.927536	0.0434783	0.0289855	0.5	0.21875	0.234375	0.0625	99.3333	#DIV/0!	0.877466	0.0854137	0.0371199	#DIV/0!	0.27287	0.183282	0.0858335	0
BAY1125976	Multiplex	EUB0000637a	C1CC(C1)(C2=CC=C(C=C2)C3=C(N4C(=N3)C=CC(=N4)C(=O)N)C5=CC=CC=C5)N	Chemogenomic candidate	10	24	HEK293T	2	1.02576	3086	0.0362929	0.963707	0.0606061	0.743107	0.234701	0.0221923	0.939394	0.0660633	0.019457	0.0524887	3025.33	0.160951	0.737455	0.183731	0.0788139	0.839049	0.452063	0.229554	0.0699568	0.474195
BAY1125976	Multiplex	EUB0000637a	C1CC(C1)(C2=CC=C(C=C2)C3=C(N4C(=N3)C=CC(=N4)C(=O)N)C5=CC=CC=C5)N	Chemogenomic candidate	10	12	HEK293T	1	0.295587	611	0.157119	0.842881	0.19802	0.629126	0.174757	0.196117	0.80198	0.058642	0.0555556	0.0493827	691.5	0.185934	0.698273	0.149796	0.151931	0.814066	0.0267306	0.0412745	0.044192	1.10218
BAY1125976	Multiplex	EUB0000637a	C1CC(C1)(C2=CC=C(C=C2)C3=C(N4C(=N3)C=CC(=N4)C(=O)N)C5=CC=CC=C5)N	Chemogenomic candidate	1	0	human fibroblast	1	0	183	0.0983607	0.901639	0.823529	0.509091	0.284848	0.206061	0.176471	0.0238095	0.0595238	0.047619	211.75	0.805591	0.539397	0.278942	0.181661	0.194409	0.021052	0.100182	0.0283348	#DIV/0!
BAY1125976	Multiplex	EUB0000637a	C1CC(C1)(C2=CC=C(C=C2)C3=C(N4C(=N3)C=CC(=N4)C(=O)N)C5=CC=CC=C5)N	Chemogenomic candidate	10	0	human fibroblast	1	0	187	0.122995	0.877005	0.814815	0.554878	0.280488	0.164634	0.185185	0.032967	0.0989011	0.043956	211.75	0.805591	0.539397	0.278942	0.181661	0.194409	0.021052	0.100182	0.0283348	#DIV/0!
BAY1125976	Multiplex	EUB0000637a	C1CC(C1)(C2=CC=C(C=C2)C3=C(N4C(=N3)C=CC(=N4)C(=O)N)C5=CC=CC=C5)N	Chemogenomic candidate	10	12	human fibroblast	1	0.974922	208	0.134615	0.865385	0.594595	0.516667	0.277778	0.205556	0.405405	0.0215054	0.0322581	0.0430108	230.667	0.695283	0.596796	0.258529	0.144676	0.304717	0.0342007	0.0357415	0.0583164	1.23771
BAY1125976	Multiplex	EUB0000637a	C1CC(C1)(C2=CC=C(C=C2)C3=C(N4C(=N3)C=CC(=N4)C(=O)N)C5=CC=CC=C5)N	Chemogenomic candidate	10	12	U2OS	2	0.905526	165	0.0484848	0.951515	0.2	0.88535	0.0828025	0.0318471	0.8	0.18705	0.230216	0.0359712	139.167	0.248909	0.881032	0.0702926	0.0486752	0.751091	0.279715	0.240817	0.0972624	1.01342
BAY1125976	Multiplex	EUB0000637a	C1CC(C1)(C2=CC=C(C=C2)C3=C(N4C(=N3)C=CC(=N4)C(=O)N)C5=CC=CC=C5)N	Chemogenomic candidate	1	0	HEK293T	1	0	809	0.168715	0.831285	0.173267	0.514785	0.21371	0.271505	0.826733	0.0130548	0.140992	0.0261097	865.667	0.13691	0.491163	0.230041	0.278796	0.86309	0.0185405	0.129798	0.0320833	#DIV/0!
BAY1125976	Multiplex	EUB0000637a	C1CC(C1)(C2=CC=C(C=C2)C3=C(N4C(=N3)C=CC(=N4)C(=O)N)C5=CC=CC=C5)N	Chemogenomic candidate	10	12	HEK293T	2	0.904988	1764	0.0243764	0.975624	0.126582	0.87914	0.0749564	0.0459035	0.873418	0.0581626	0.0846001	0.0178453	1765.83	0.0828653	0.866876	0.0909282	0.0421957	0.917135	0.0464362	0.0760075	0.0151675	0.999314
BAY1125976	Multiplex	EUB0000637a	C1CC(C1)(C2=CC=C(C=C2)C3=C(N4C(=N3)C=CC(=N4)C(=O)N)C5=CC=CC=C5)N	Chemogenomic candidate	1	0	HEK293T	2	0	925	0.0389189	0.961081	0.118012	0.768279	0.0506187	0.181102	0.881988	0.00439239	0.288433	0.00292826	1080.25	0.142406	0.776982	0.0533037	0.169714	0.857594	0.00453037	0.323128	0.00113292	#DIV/0!
BAY1125976	Multiplex	EUB0000637a	C1CC(C1)(C2=CC=C(C=C2)C3=C(N4C(=N3)C=CC(=N4)C(=O)N)C5=CC=CC=C5)N	Chemogenomic candidate	10	0	HEK293T	2	0	1119	0.0321716	0.967828	0.122222	0.795014	0.0387812	0.166205	0.877778	0.00232288	0.308943	0	1080.25	0.142406	0.776982	0.0533037	0.169714	0.857594	0.00453037	0.323128	0.00113292	#DIV/0!
BAY-179	Multiplex	EUB0000752a	N1(CC2=NC3=C(C=CC=N3)N2)CCC(c4scc(c(c5)oc6c5cccc6)n4)CC1	Chemogenomic candidate	1	24	human fibroblast	2	5.51622	92	0.391304	0.608696	0.25	0.285714	0.642857	0.0714286	0.75	0.25	0	0.25	80.0833	0.552381	0.346171	0.555718	0.0981105	0.447619	0.11087	0.120814	0.103	231110	tag healthy nuclei < 50 %
BAY-179	Multiplex	EUB0000752a	N1(CC2=NC3=C(C=CC=N3)N2)CCC(c4scc(c(c5)oc6c5cccc6)n4)CC1	Chemogenomic candidate	10	12	human fibroblast	2	-1	76	0.355263	0.644737	0.666667	0.285714	0.653061	0.0612245	0.333333	0	0	0.214286	84.3333	0.520833	0.311795	0.58592	0.102285	0.479167	0.125354	0.149616	0.0949875	7.64557e+11	tag healthy nuclei < 50 %
BAY-179	Multiplex	EUB0000752a	N1(CC2=NC3=C(C=CC=N3)N2)CCC(c4scc(c(c5)oc6c5cccc6)n4)CC1	Chemogenomic candidate	1	12	human fibroblast	2	-0.999987	103	0.349515	0.650485	0.25	0.283582	0.597015	0.119403	0.75	0.263158	0.0526316	0.157895	84.3333	0.520833	0.311795	0.58592	0.102285	0.479167	0.125354	0.149616	0.0949875	7.64557e+11	tag healthy nuclei < 50 %
BAY-179	Multiplex	EUB0000752a	N1(CC2=NC3=C(C=CC=N3)N2)CCC(c4scc(c(c5)oc6c5cccc6)n4)CC1	Chemogenomic candidate	10	24	human fibroblast	2	2.77216e+06	67	0.343284	0.656716	1	0.340909	0.590909	0.0681818	0	0	0.0666667	0.133333	80.0833	0.552381	0.346171	0.555718	0.0981105	0.447619	0.11087	0.120814	0.103	231110	tag healthy nuclei < 50 %
BAY-179	Multiplex	EUB0000752a	N1(CC2=NC3=C(C=CC=N3)N2)CCC(c4scc(c(c5)oc6c5cccc6)n4)CC1	Chemogenomic candidate	1	12	HEK293T	1	-0.593011	599	0.195326	0.804674	0.234637	0.394191	0.23444	0.371369	0.765363	0.0736842	0.0578947	0.0578947	691.5	0.185934	0.698273	0.149796	0.151931	0.814066	0.0267306	0.0412745	0.044192	1.10218	tag healthy nuclei < 50 %
BAY-179	Multiplex	EUB0000752a	N1(CC2=NC3=C(C=CC=N3)N2)CCC(c4scc(c(c5)oc6c5cccc6)n4)CC1	Chemogenomic candidate	1	0	HEK293T	1	0	825	0.231076	0.768924	0.161111	0.443869	0.24525	0.310881	0.838889	0.0272374	0.159533	0.0311284	865.667	0.13691	0.491163	0.230041	0.278796	0.86309	0.0185405	0.129798	0.0320833	#DIV/0!	tag healthy nuclei < 50 %
BAY-179	Multiplex	EUB0000752a	N1(CC2=NC3=C(C=CC=N3)N2)CCC(c4scc(c(c5)oc6c5cccc6)n4)CC1	Chemogenomic candidate	10	0	HEK293T	1	0	927	0.209581	0.790419	0.119318	0.422348	0.244318	0.333333	0.880682	0.0403587	0.152466	0.0179372	865.667	0.13691	0.491163	0.230041	0.278796	0.86309	0.0185405	0.129798	0.0320833	#DIV/0!	tag healthy nuclei < 50 %
BAY-179	Multiplex	EUB0000752a	N1(CC2=NC3=C(C=CC=N3)N2)CCC(c4scc(c(c5)oc6c5cccc6)n4)CC1	Chemogenomic candidate	1	0	human fibroblast	2	0	82	0.426829	0.573171	0.444444	0.319149	0.489362	0.191489	0.555556	0.133333	0.2	0	99.3333	0.557903	0.293865	0.595118	0.111016	0.442097	0.112114	0.290215	0.0427216	#DIV/0!	tag healthy nuclei < 50 %
BAY-179	Multiplex	EUB0000752a	N1(CC2=NC3=C(C=CC=N3)N2)CCC(c4scc(c(c5)oc6c5cccc6)n4)CC1	Chemogenomic candidate	10	0	human fibroblast	2	0	96	0.458333	0.541667	1	0.173077	0.730769	0.0961538	0	0.333333	0.555556	0.222222	99.3333	0.557903	0.293865	0.595118	0.111016	0.442097	0.112114	0.290215	0.0427216	#DIV/0!	tag healthy nuclei < 50 %, tag mitochondrial mass > 50 %
BAY-179	Multiplex	EUB0000752a	N1(CC2=NC3=C(C=CC=N3)N2)CCC(c4scc(c(c5)oc6c5cccc6)n4)CC1	Chemogenomic candidate	10	12	U2OS	2	0.989356	114	0.157895	0.842105	0.25	0.885417	0.0729167	0.0416667	0.75	0.341176	0.341176	0.188235	139.167	0.248909	0.881032	0.0702926	0.0486752	0.751091	0.279715	0.240817	0.0972624	1.01342
BAY-179	Multiplex	EUB0000752a	N1(CC2=NC3=C(C=CC=N3)N2)CCC(c4scc(c(c5)oc6c5cccc6)n4)CC1	Chemogenomic candidate	10	0	U2OS	2	0	100	0.33	0.67	0.333333	0.835821	0.119403	0.0447761	0.666667	0.285714	0.285714	0.142857	99.3333	#DIV/0!	0.877466	0.0854137	0.0371199	#DIV/0!	0.27287	0.183282	0.0858335	0
BAY-179	Multiplex	EUB0000752a	N1(CC2=NC3=C(C=CC=N3)N2)CCC(c4scc(c(c5)oc6c5cccc6)n4)CC1	Chemogenomic candidate	1	12	U2OS	1	0.865553	182	0.0384615	0.961538	0.0833333	0.902857	0.0285714	0.0685714	0.916667	0.101266	0.151899	0.120253	199.167	0.369403	0.889153	0.0559111	0.0549359	0.630597	0.260916	0.219385	0.107163	1.00798
BAY-179	Multiplex	EUB0000752a	N1(CC2=NC3=C(C=CC=N3)N2)CCC(c4scc(c(c5)oc6c5cccc6)n4)CC1	Chemogenomic candidate	10	24	U2OS	2	0.985417	137	0.0948905	0.905109	0	0.91129	0.0483871	0.0403226	1	0.336283	0.336283	0.115044	178.5	0.310463	0.888541	0.0624047	0.049054	0.689537	0.288716	0.291394	0.0647451	1.00514
BAY-179	Multiplex	EUB0000752a	N1(CC2=NC3=C(C=CC=N3)N2)CCC(c4scc(c(c5)oc6c5cccc6)n4)CC1	Chemogenomic candidate	1	24	human fibroblast	1	0.370443	165	0.127273	0.872727	0.5	0.513889	0.388889	0.0972222	0.5	0.175676	0.0405405	0.108108	242.833	0.651394	0.612787	0.255064	0.132149	0.348606	0.025027	0.0173706	0.0467803	1.19614
BAY-179	Multiplex	EUB0000752a	N1(CC2=NC3=C(C=CC=N3)N2)CCC(c4scc(c(c5)oc6c5cccc6)n4)CC1	Chemogenomic candidate	10	12	U2OS	1	1.08882	205	0.0341463	0.965854	0.428571	0.919192	0.0454545	0.0353535	0.571429	0.291209	0.252747	0.0989011	199.167	0.369403	0.889153	0.0559111	0.0549359	0.630597	0.260916	0.219385	0.107163	1.00798
BAY-179	Multiplex	EUB0000752a	N1(CC2=NC3=C(C=CC=N3)N2)CCC(c4scc(c(c5)oc6c5cccc6)n4)CC1	Chemogenomic candidate	1	12	human fibroblast	1	0.600773	160	0.15	0.85	0.736842	0.551471	0.308824	0.139706	0.263158	0.12	0.106667	0.0933333	230.667	0.695283	0.596796	0.258529	0.144676	0.304717	0.0342007	0.0357415	0.0583164	1.23771
BAY-179	Multiplex	EUB0000752a	N1(CC2=NC3=C(C=CC=N3)N2)CCC(c4scc(c(c5)oc6c5cccc6)n4)CC1	Chemogenomic candidate	1	24	U2OS	2	0.58676	181	0.038674	0.961326	0.25	0.885057	0.045977	0.0689655	0.75	0.227273	0.24026	0.0909091	178.5	0.310463	0.888541	0.0624047	0.049054	0.689537	0.288716	0.291394	0.0647451	1.00514
BAY-179	Multiplex	EUB0000752a	N1(CC2=NC3=C(C=CC=N3)N2)CCC(c4scc(c(c5)oc6c5cccc6)n4)CC1	Chemogenomic candidate	1	24	HEK293T	1	-0.127384	538	0.152416	0.847584	0.206107	0.5	0.212719	0.287281	0.793893	0.131579	0.105263	0.0833333	838.25	0.154355	0.792279	0.137252	0.0704688	0.845645	0.0333863	0.0308318	0.0797788	1.0151
BAY-179	Multiplex	EUB0000752a	N1(CC2=NC3=C(C=CC=N3)N2)CCC(c4scc(c(c5)oc6c5cccc6)n4)CC1	Chemogenomic candidate	1	12	U2OS	2	0.270354	141	0.0780142	0.921986	0.25	0.853846	0.0846154	0.0615385	0.75	0.153153	0.279279	0.0810811	139.167	0.248909	0.881032	0.0702926	0.0486752	0.751091	0.279715	0.240817	0.0972624	1.01342
BAY-179	Multiplex	EUB0000752a	N1(CC2=NC3=C(C=CC=N3)N2)CCC(c4scc(c(c5)oc6c5cccc6)n4)CC1	Chemogenomic candidate	10	0	U2OS	1	0	166	0.0722892	0.927711	0.333333	0.896104	0.0454545	0.0584416	0.666667	0.224638	0.0797101	0.0797101	156.5	0.597808	0.882455	0.0611652	0.0563801	0.402192	0.271242	0.126392	0.10096	0
BAY-179	Multiplex	EUB0000752a	N1(CC2=NC3=C(C=CC=N3)N2)CCC(c4scc(c(c5)oc6c5cccc6)n4)CC1	Chemogenomic candidate	10	24	HEK293T	1	0.175266	500	0.154	0.846	0.160494	0.607565	0.200946	0.191489	0.839506	0.0700389	0.0505837	0.077821	838.25	0.154355	0.792279	0.137252	0.0704688	0.845645	0.0333863	0.0308318	0.0797788	1.0151
BAY-179	Multiplex	EUB0000752a	N1(CC2=NC3=C(C=CC=N3)N2)CCC(c4scc(c(c5)oc6c5cccc6)n4)CC1	Chemogenomic candidate	1	24	U2OS	1	0.65146	223	0.0224215	0.977578	0.4	0.90367	0.0275229	0.0688073	0.6	0.192893	0.167513	0.0761421	276.667	0.370298	0.917275	0.0423433	0.0403816	0.629702	0.31212	0.21103	0.0682442	1.0014
BAY-179	Multiplex	EUB0000752a	N1(CC2=NC3=C(C=CC=N3)N2)CCC(c4scc(c(c5)oc6c5cccc6)n4)CC1	Chemogenomic candidate	1	0	U2OS	1	0	142	0.0422535	0.957746	0.25	0.919118	0.0514706	0.0294118	0.75	0.256	0.088	0.072	156.5	0.597808	0.882455	0.0611652	0.0563801	0.402192	0.271242	0.126392	0.10096	0
BAY-179	Multiplex	EUB0000752a	N1(CC2=NC3=C(C=CC=N3)N2)CCC(c4scc(c(c5)oc6c5cccc6)n4)CC1	Chemogenomic candidate	10	24	HEK293T	2	0.730361	1653	0.0320629	0.967937	0.05	0.84875	0.11375	0.0375	0.95	0.0935199	0.0272459	0.0618557	3025.33	0.160951	0.737455	0.183731	0.0788139	0.839049	0.452063	0.229554	0.0699568	0.474195
BAY-179	Multiplex	EUB0000752a	N1(CC2=NC3=C(C=CC=N3)N2)CCC(c4scc(c(c5)oc6c5cccc6)n4)CC1	Chemogenomic candidate	10	24	U2OS	1	0.934219	282	0.0141844	0.985816	0.454545	0.902878	0.057554	0.0395683	0.545455	0.330677	0.14741	0.059761	276.667	0.370298	0.917275	0.0423433	0.0403816	0.629702	0.31212	0.21103	0.0682442	1.0014
BAY-179	Multiplex	EUB0000752a	N1(CC2=NC3=C(C=CC=N3)N2)CCC(c4scc(c(c5)oc6c5cccc6)n4)CC1	Chemogenomic candidate	10	12	HEK293T	1	0.229032	511	0.148728	0.851272	0.17094	0.549425	0.181609	0.268966	0.82906	0.041841	0.0502092	0.0502092	691.5	0.185934	0.698273	0.149796	0.151931	0.814066	0.0267306	0.0412745	0.044192	1.10218
BAY-179	Multiplex	EUB0000752a	N1(CC2=NC3=C(C=CC=N3)N2)CCC(c4scc(c(c5)oc6c5cccc6)n4)CC1	Chemogenomic candidate	1	0	U2OS	2	0	119	0.109244	0.890756	0	0.90566	0.0660377	0.0283019	1	0.270833	0.15625	0.0416667	99.3333	#DIV/0!	0.877466	0.0854137	0.0371199	#DIV/0!	0.27287	0.183282	0.0858335	0
BAY-179	Multiplex	EUB0000752a	N1(CC2=NC3=C(C=CC=N3)N2)CCC(c4scc(c(c5)oc6c5cccc6)n4)CC1	Chemogenomic candidate	1	24	HEK293T	2	0.257636	1346	0.0616642	0.938336	0.15625	0.867775	0.0562154	0.0760095	0.84375	0.300182	0.124088	0.040146	3025.33	0.160951	0.737455	0.183731	0.0788139	0.839049	0.452063	0.229554	0.0699568	0.474195
BAY-179	Multiplex	EUB0000752a	N1(CC2=NC3=C(C=CC=N3)N2)CCC(c4scc(c(c5)oc6c5cccc6)n4)CC1	Chemogenomic candidate	10	12	human fibroblast	1	0.607218	190	0.110526	0.889474	0.636364	0.550296	0.254438	0.195266	0.363636	0.0430108	0.0107527	0.0322581	230.667	0.695283	0.596796	0.258529	0.144676	0.304717	0.0342007	0.0357415	0.0583164	1.23771
BAY-179	Multiplex	EUB0000752a	N1(CC2=NC3=C(C=CC=N3)N2)CCC(c4scc(c(c5)oc6c5cccc6)n4)CC1	Chemogenomic candidate	10	12	HEK293T	2	0.511059	1122	0.0347594	0.965241	0.126582	0.865189	0.0618652	0.0729455	0.873418	0.0469584	0.103522	0.0245464	1765.83	0.0828653	0.866876	0.0909282	0.0421957	0.917135	0.0464362	0.0760075	0.0151675	0.999314
BAY-179	Multiplex	EUB0000752a	N1(CC2=NC3=C(C=CC=N3)N2)CCC(c4scc(c(c5)oc6c5cccc6)n4)CC1	Chemogenomic candidate	10	24	human fibroblast	1	0.639354	183	0.114754	0.885246	0.909091	0.598765	0.265432	0.135802	0.0909091	0.0206186	0	0.0206186	242.833	0.651394	0.612787	0.255064	0.132149	0.348606	0.025027	0.0173706	0.0467803	1.19614
BAY-179	Multiplex	EUB0000752a	N1(CC2=NC3=C(C=CC=N3)N2)CCC(c4scc(c(c5)oc6c5cccc6)n4)CC1	Chemogenomic candidate	1	0	human fibroblast	1	0	207	0.111111	0.888889	0.833333	0.586957	0.217391	0.195652	0.166667	0.0277778	0.0740741	0.0185185	211.75	0.805591	0.539397	0.278942	0.181661	0.194409	0.021052	0.100182	0.0283348	#DIV/0!
BAY-179	Multiplex	EUB0000752a	N1(CC2=NC3=C(C=CC=N3)N2)CCC(c4scc(c(c5)oc6c5cccc6)n4)CC1	Chemogenomic candidate	1	12	HEK293T	2	0.184742	1174	0.048552	0.951448	0.136364	0.837959	0.0438675	0.118174	0.863636	0.133547	0.21688	0.0149573	1765.83	0.0828653	0.866876	0.0909282	0.0421957	0.917135	0.0464362	0.0760075	0.0151675	0.999314
BAY-179	Multiplex	EUB0000752a	N1(CC2=NC3=C(C=CC=N3)N2)CCC(c4scc(c(c5)oc6c5cccc6)n4)CC1	Chemogenomic candidate	1	0	HEK293T	2	0	1065	0.0366197	0.96338	0.159091	0.78655	0.0419103	0.17154	0.840909	0.00371747	0.287485	0	1080.25	0.142406	0.776982	0.0533037	0.169714	0.857594	0.00453037	0.323128	0.00113292	#DIV/0!
BAY-179	Multiplex	EUB0000752a	N1(CC2=NC3=C(C=CC=N3)N2)CCC(c4scc(c(c5)oc6c5cccc6)n4)CC1	Chemogenomic candidate	10	0	HEK293T	2	0	925	0.0335135	0.966486	0.137931	0.730425	0.0749441	0.194631	0.862069	0	0.280245	0	1080.25	0.142406	0.776982	0.0533037	0.169714	0.857594	0.00453037	0.323128	0.00113292	#DIV/0!
BAY-179	Multiplex	EUB0000752a	N1(CC2=NC3=C(C=CC=N3)N2)CCC(c4scc(c(c5)oc6c5cccc6)n4)CC1	Chemogenomic candidate	10	0	human fibroblast	1	0	207	0.0483092	0.951691	0.735294	0.598985	0.228426	0.172589	0.264706	0	0.0677966	0	211.75	0.805591	0.539397	0.278942	0.181661	0.194409	0.021052	0.100182	0.0283348	#DIV/0!
BAY-293	Multiplex	EUB0000320b	CNCc1ccccc1-c1csc([C@@H](C)Nc2nc(C)nc3cc(OC)c(OC)cc23)c1	Chemogenomic candidate	10	12	human fibroblast	2	8.74288e+10	85	0.341176	0.658824	0.833333	0.178571	0.5	0.321429	0.166667	0.5	0.5	0.2	84.3333	0.520833	0.311795	0.58592	0.102285	0.479167	0.125354	0.149616	0.0949875	7.64557e+11	tag healthy nuclei < 50 %
BAY-293	Multiplex	EUB0000320b	CNCc1ccccc1-c1csc([C@@H](C)Nc2nc(C)nc3cc(OC)c(OC)cc23)c1	Chemogenomic candidate	10	0	human fibroblast	2	0	87	0.37931	0.62069	0.636364	0.314815	0.481481	0.203704	0.363636	0.176471	0.294118	0.117647	99.3333	0.557903	0.293865	0.595118	0.111016	0.442097	0.112114	0.290215	0.0427216	#DIV/0!	tag healthy nuclei < 50 %
BAY-293	Multiplex	EUB0000320b	CNCc1ccccc1-c1csc([C@@H](C)Nc2nc(C)nc3cc(OC)c(OC)cc23)c1	Chemogenomic candidate	10	12	human fibroblast	1	1.25525	656	0.416159	0.583841	0.457447	0.456919	0.29765	0.245431	0.542553	0.171429	0.0228571	0.114286	230.667	0.695283	0.596796	0.258529	0.144676	0.304717	0.0342007	0.0357415	0.0583164	1.23771	tag healthy nuclei < 50 %
BAY-293	Multiplex	EUB0000320b	CNCc1ccccc1-c1csc([C@@H](C)Nc2nc(C)nc3cc(OC)c(OC)cc23)c1	Chemogenomic candidate	10	24	human fibroblast	1	-0.99713	147	0.163265	0.836735	0.898551	0.0731707	0.365854	0.560976	0.101449	0.222222	0.222222	0.111111	242.833	0.651394	0.612787	0.255064	0.132149	0.348606	0.025027	0.0173706	0.0467803	1.19614	tag healthy nuclei < 50 %
BAY-293	Multiplex	EUB0000320b	CNCc1ccccc1-c1csc([C@@H](C)Nc2nc(C)nc3cc(OC)c(OC)cc23)c1	Chemogenomic candidate	10	12	human fibroblast	2	-0.999991	127	0.425197	0.574803	0.666667	0.315068	0.520548	0.164384	0.333333	0.304348	0.130435	0.0869565	84.3333	0.520833	0.311795	0.58592	0.102285	0.479167	0.125354	0.149616	0.0949875	7.64557e+11	tag healthy nuclei < 50 %
BAY-293	Multiplex	EUB0000320b	CNCc1ccccc1-c1csc([C@@H](C)Nc2nc(C)nc3cc(OC)c(OC)cc23)c1	Chemogenomic candidate	10	24	human fibroblast	1	1.2134	643	0.407465	0.592535	0.383178	0.485564	0.233596	0.28084	0.616822	0.140541	0.0324324	0.0486486	242.833	0.651394	0.612787	0.255064	0.132149	0.348606	0.025027	0.0173706	0.0467803	1.19614	tag healthy nuclei < 50 %
BAY-293	Multiplex	EUB0000320b	CNCc1ccccc1-c1csc([C@@H](C)Nc2nc(C)nc3cc(OC)c(OC)cc23)c1	Chemogenomic candidate	10	0	HEK293T	1	0	941	0.167506	0.832494	0.146341	0.438729	0.313162	0.248109	0.853659	0.00344828	0.106897	0.0413793	865.667	0.13691	0.491163	0.230041	0.278796	0.86309	0.0185405	0.129798	0.0320833	#DIV/0!	tag healthy nuclei < 50 %
BAY-293	Multiplex	EUB0000320b	CNCc1ccccc1-c1csc([C@@H](C)Nc2nc(C)nc3cc(OC)c(OC)cc23)c1	Chemogenomic candidate	10	0	HEK293T	1	0	803	0.23014	0.76986	0.158371	0.426404	0.23824	0.335357	0.841629	0.0106762	0.160142	0.0355872	865.667	0.13691	0.491163	0.230041	0.278796	0.86309	0.0185405	0.129798	0.0320833	#DIV/0!	tag healthy nuclei < 50 %
BAY-293	Multiplex	EUB0000320b	CNCc1ccccc1-c1csc([C@@H](C)Nc2nc(C)nc3cc(OC)c(OC)cc23)c1	Chemogenomic candidate	10	24	human fibroblast	2	1.05062e+08	161	0.440994	0.559006	0.666667	0.377778	0.522222	0.1	0.333333	0.382353	0.117647	0.0294118	80.0833	0.552381	0.346171	0.555718	0.0981105	0.447619	0.11087	0.120814	0.103	231110	tag healthy nuclei < 50 %
BAY-293	Multiplex	EUB0000320b	CNCc1ccccc1-c1csc([C@@H](C)Nc2nc(C)nc3cc(OC)c(OC)cc23)c1	Chemogenomic candidate	10	0	human fibroblast	2	0	103	0.378641	0.621359	0.2	0.28125	0.640625	0.078125	0.8	0.0555556	0.5	0	99.3333	0.557903	0.293865	0.595118	0.111016	0.442097	0.112114	0.290215	0.0427216	#DIV/0!	tag healthy nuclei < 50 %
BAY-293	Multiplex	EUB0000320b	CNCc1ccccc1-c1csc([C@@H](C)Nc2nc(C)nc3cc(OC)c(OC)cc23)c1	Chemogenomic candidate	10	24	human fibroblast	2	-1	72	0.444444	0.555556	0.909091	0.125	0.6	0.275	0.0909091	0.2	0.4	0.6	80.0833	0.552381	0.346171	0.555718	0.0981105	0.447619	0.11087	0.120814	0.103	231110	tag healthy nuclei < 50 %, tag membrane permeabilized > 50 %
BAY-293	Multiplex	EUB0000320b	CNCc1ccccc1-c1csc([C@@H](C)Nc2nc(C)nc3cc(OC)c(OC)cc23)c1	Chemogenomic candidate	10	12	HEK293T	1	-0.554558	581	0.165232	0.834768	0.191617	0.45567	0.2	0.34433	0.808383	0.80543	0.180995	0.294118	691.5	0.185934	0.698273	0.149796	0.151931	0.814066	0.0267306	0.0412745	0.044192	1.10218	tag healthy nuclei < 50 %, tag tubulin effect > 50 %
BAY-293	Multiplex	EUB0000320b	CNCc1ccccc1-c1csc([C@@H](C)Nc2nc(C)nc3cc(OC)c(OC)cc23)c1	Chemogenomic candidate	10	12	human fibroblast	1	0	232	0.12069	0.87931	0.521739	0.279412	0.382353	0.338235	0.478261	0.754386	0.333333	0.245614	230.667	0.695283	0.596796	0.258529	0.144676	0.304717	0.0342007	0.0357415	0.0583164	1.23771	tag healthy nuclei < 50 %, tag tubulin effect > 50 %
BAY-293	Multiplex	EUB0000320b	CNCc1ccccc1-c1csc([C@@H](C)Nc2nc(C)nc3cc(OC)c(OC)cc23)c1	Chemogenomic candidate	10	24	HEK293T	1	-0.780958	668	0.252994	0.747006	0.551237	0.148297	0.284569	0.567134	0.448763	0.594595	0.459459	0.175676	838.25	0.154355	0.792279	0.137252	0.0704688	0.845645	0.0333863	0.0308318	0.0797788	1.0151	tag healthy nuclei < 50 %, tag tubulin effect > 50 %
BAY-293	Multiplex	EUB0000320b	CNCc1ccccc1-c1csc([C@@H](C)Nc2nc(C)nc3cc(OC)c(OC)cc23)c1	Chemogenomic candidate	10	12	HEK293T	1	-0.971523	619	0.224556	0.775444	0.474403	0.177083	0.2125	0.610417	0.525597	0.658824	0.541176	0.152941	691.5	0.185934	0.698273	0.149796	0.151931	0.814066	0.0267306	0.0412745	0.044192	1.10218	tag healthy nuclei < 50 %, tag tubulin effect > 50 %, tag mitochondrial mass > 50 %
BAY-293	Multiplex	EUB0000320b	CNCc1ccccc1-c1csc([C@@H](C)Nc2nc(C)nc3cc(OC)c(OC)cc23)c1	Chemogenomic candidate	10	24	HEK293T	2	-0.414741	918	0.107843	0.892157	0.469697	0.462759	0.0537241	0.483516	0.530303	0.730871	0.915567	0.0237467	3025.33	0.160951	0.737455	0.183731	0.0788139	0.839049	0.452063	0.229554	0.0699568	0.474195	tag healthy nuclei < 50 %, tag tubulin effect > 50 %, tag mitochondrial mass > 50 %
BAY-293	Multiplex	EUB0000320b	CNCc1ccccc1-c1csc([C@@H](C)Nc2nc(C)nc3cc(OC)c(OC)cc23)c1	Chemogenomic candidate	10	24	U2OS	1	-0.889999	133	0.195489	0.804511	0.915493	0.140187	0.196262	0.663551	0.084507	1	1	1	276.667	0.370298	0.917275	0.0423433	0.0403816	0.629702	0.31212	0.21103	0.0682442	1.0014	tag healthy nuclei < 50 %, tag tubulin effect > 50 %, tag mitochondrial mass > 50 %, tag membrane permeabilized > 50 %
BAY-293	Multiplex	EUB0000320b	CNCc1ccccc1-c1csc([C@@H](C)Nc2nc(C)nc3cc(OC)c(OC)cc23)c1	Chemogenomic candidate	10	24	U2OS	2	-0.512626	84	0.107143	0.892857	0.848485	0.306667	0.253333	0.44	0.151515	0.956522	0.956522	0.913043	178.5	0.310463	0.888541	0.0624047	0.049054	0.689537	0.288716	0.291394	0.0647451	1.00514	tag healthy nuclei < 50 %, tag tubulin effect > 50 %, tag mitochondrial mass > 50 %, tag membrane permeabilized > 50 %
BAY-293	Multiplex	EUB0000320b	CNCc1ccccc1-c1csc([C@@H](C)Nc2nc(C)nc3cc(OC)c(OC)cc23)c1	Chemogenomic candidate	10	12	U2OS	1	-0.909559	132	0.0530303	0.94697	0.634615	0.36	0.224	0.416	0.365385	1	0.888889	0.733333	199.167	0.369403	0.889153	0.0559111	0.0549359	0.630597	0.260916	0.219385	0.107163	1.00798	tag healthy nuclei < 50 %, tag tubulin effect > 50 %, tag mitochondrial mass > 50 %, tag membrane permeabilized > 50 %
BAY-293	Multiplex	EUB0000320b	CNCc1ccccc1-c1csc([C@@H](C)Nc2nc(C)nc3cc(OC)c(OC)cc23)c1	Chemogenomic candidate	10	24	HEK293T	1	0.246697	627	0.135566	0.864434	0.231579	0.649446	0.175277	0.175277	0.768421	0.892045	0.161932	0.366477	838.25	0.154355	0.792279	0.137252	0.0704688	0.845645	0.0333863	0.0308318	0.0797788	1.0151	tag tubulin effect > 50 %
BAY-293	Multiplex	EUB0000320b	CNCc1ccccc1-c1csc([C@@H](C)Nc2nc(C)nc3cc(OC)c(OC)cc23)c1	Chemogenomic candidate	10	12	HEK293T	2	0.470287	1447	0.0317899	0.96821	0.080402	0.807994	0.0499643	0.142041	0.919598	0.956714	0.240283	0.292403	1765.83	0.0828653	0.866876	0.0909282	0.0421957	0.917135	0.0464362	0.0760075	0.0151675	0.999314	tag tubulin effect > 50 %
BAY-293	Multiplex	EUB0000320b	CNCc1ccccc1-c1csc([C@@H](C)Nc2nc(C)nc3cc(OC)c(OC)cc23)c1	Chemogenomic candidate	10	24	HEK293T	2	0.832438	2344	0.0307167	0.969283	0.0526316	0.798415	0.159771	0.0418134	0.947368	0.823043	0.0871003	0.260198	3025.33	0.160951	0.737455	0.183731	0.0788139	0.839049	0.452063	0.229554	0.0699568	0.474195	tag tubulin effect > 50 %
BAY-293	Multiplex	EUB0000320b	CNCc1ccccc1-c1csc([C@@H](C)Nc2nc(C)nc3cc(OC)c(OC)cc23)c1	Chemogenomic candidate	10	12	U2OS	1	0.450614	238	0.0420168	0.957983	0.464286	0.807018	0.0701754	0.122807	0.535714	0.98913	0.369565	0.543478	199.167	0.369403	0.889153	0.0559111	0.0549359	0.630597	0.260916	0.219385	0.107163	1.00798	tag tubulin effect > 50 %, tag membrane permeabilized > 50 %
BAY-293	Multiplex	EUB0000320b	CNCc1ccccc1-c1csc([C@@H](C)Nc2nc(C)nc3cc(OC)c(OC)cc23)c1	Chemogenomic candidate	10	12	U2OS	2	0.0987915	145	0.144828	0.855172	0.545455	0.725806	0.0967742	0.177419	0.454545	1	0.566667	0.466667	139.167	0.248909	0.881032	0.0702926	0.0486752	0.751091	0.279715	0.240817	0.0972624	1.01342	tag tubulin effect > 50 %, tag mitochondrial mass > 50 %
BAY-293	Multiplex	EUB0000320b	CNCc1ccccc1-c1csc([C@@H](C)Nc2nc(C)nc3cc(OC)c(OC)cc23)c1	Chemogenomic candidate	10	24	U2OS	2	0.103316	169	0.0828402	0.91716	0.454545	0.606452	0.109677	0.283871	0.545455	0.968085	0.723404	0.43617	178.5	0.310463	0.888541	0.0624047	0.049054	0.689537	0.288716	0.291394	0.0647451	1.00514	tag tubulin effect > 50 %, tag mitochondrial mass > 50 %
BAY-293	Multiplex	EUB0000320b	CNCc1ccccc1-c1csc([C@@H](C)Nc2nc(C)nc3cc(OC)c(OC)cc23)c1	Chemogenomic candidate	10	12	HEK293T	2	-0.425836	918	0.0947712	0.905229	0.342262	0.574007	0.0216606	0.404332	0.657738	0.922432	0.823899	0.0712788	1765.83	0.0828653	0.866876	0.0909282	0.0421957	0.917135	0.0464362	0.0760075	0.0151675	0.999314	tag tubulin effect > 50 %, tag mitochondrial mass > 50 %
BAY-293	Multiplex	EUB0000320b	CNCc1ccccc1-c1csc([C@@H](C)Nc2nc(C)nc3cc(OC)c(OC)cc23)c1	Chemogenomic candidate	10	12	U2OS	2	-0.377599	83	0.168675	0.831325	0.52381	0.521739	0.173913	0.304348	0.47619	0.972222	0.972222	0.75	139.167	0.248909	0.881032	0.0702926	0.0486752	0.751091	0.279715	0.240817	0.0972624	1.01342	tag tubulin effect > 50 %, tag mitochondrial mass > 50 %, tag membrane permeabilized > 50 %
BAY-293	Multiplex	EUB0000320b	CNCc1ccccc1-c1csc([C@@H](C)Nc2nc(C)nc3cc(OC)c(OC)cc23)c1	Chemogenomic candidate	10	24	U2OS	1	0.0691434	282	0.0744681	0.925532	0.458333	0.651341	0.0727969	0.275862	0.541667	0.970588	0.641176	0.523529	276.667	0.370298	0.917275	0.0423433	0.0403816	0.629702	0.31212	0.21103	0.0682442	1.0014	tag tubulin effect > 50 %, tag mitochondrial mass > 50 %, tag membrane permeabilized > 50 %
BAY-293	Multiplex	EUB0000320b	CNCc1ccccc1-c1csc([C@@H](C)Nc2nc(C)nc3cc(OC)c(OC)cc23)c1	Chemogenomic candidate	10	0	U2OS	1	0	188	0.037234	0.962766	0.916667	0.883978	0.0497238	0.0662983	0.0833333	0.3375	0.08125	0.14375	156.5	0.597808	0.882455	0.0611652	0.0563801	0.402192	0.271242	0.126392	0.10096	0
BAY-293	Multiplex	EUB0000320b	CNCc1ccccc1-c1csc([C@@H](C)Nc2nc(C)nc3cc(OC)c(OC)cc23)c1	Chemogenomic candidate	10	0	U2OS	1	0	131	0.0534351	0.946565	0.285714	0.895161	0.0483871	0.0564516	0.714286	0.315315	0.0900901	0.0810811	156.5	0.597808	0.882455	0.0611652	0.0563801	0.402192	0.271242	0.126392	0.10096	0
BAY-293	Multiplex	EUB0000320b	CNCc1ccccc1-c1csc([C@@H](C)Nc2nc(C)nc3cc(OC)c(OC)cc23)c1	Chemogenomic candidate	10	0	U2OS	2	0	129	0.294574	0.705426	#DIV/0!	0.934066	0.0659341	0	#DIV/0!	0.447059	0.141176	0.0705882	99.3333	#DIV/0!	0.877466	0.0854137	0.0371199	#DIV/0!	0.27287	0.183282	0.0858335	0
BAY-293	Multiplex	EUB0000320b	CNCc1ccccc1-c1csc([C@@H](C)Nc2nc(C)nc3cc(OC)c(OC)cc23)c1	Chemogenomic candidate	10	0	U2OS	2	0	67	0.179104	0.820896	0	0.872727	0.109091	0.0181818	1	0.354167	0.208333	0.0625	99.3333	#DIV/0!	0.877466	0.0854137	0.0371199	#DIV/0!	0.27287	0.183282	0.0858335	0
BAY-293	Multiplex	EUB0000320b	CNCc1ccccc1-c1csc([C@@H](C)Nc2nc(C)nc3cc(OC)c(OC)cc23)c1	Chemogenomic candidate	10	0	human fibroblast	1	0	290	0.0724138	0.927586	0.8125	0.613383	0.208178	0.178439	0.1875	0.0242424	0.0666667	0.0484848	211.75	0.805591	0.539397	0.278942	0.181661	0.194409	0.021052	0.100182	0.0283348	#DIV/0!
BAY-293	Multiplex	EUB0000320b	CNCc1ccccc1-c1csc([C@@H](C)Nc2nc(C)nc3cc(OC)c(OC)cc23)c1	Chemogenomic candidate	10	0	human fibroblast	1	0	223	0.058296	0.941704	0.731707	0.561905	0.242857	0.195238	0.268293	0.0254237	0.101695	0.0254237	211.75	0.805591	0.539397	0.278942	0.181661	0.194409	0.021052	0.100182	0.0283348	#DIV/0!
BAY-293	Multiplex	EUB0000320b	CNCc1ccccc1-c1csc([C@@H](C)Nc2nc(C)nc3cc(OC)c(OC)cc23)c1	Chemogenomic candidate	10	0	HEK293T	2	0	1046	0.0382409	0.961759	0.190751	0.770378	0.0576541	0.171968	0.809249	0.00516129	0.295484	0.00258065	1080.25	0.142406	0.776982	0.0533037	0.169714	0.857594	0.00453037	0.323128	0.00113292	#DIV/0!
BAY-293	Multiplex	EUB0000320b	CNCc1ccccc1-c1csc([C@@H](C)Nc2nc(C)nc3cc(OC)c(OC)cc23)c1	Chemogenomic candidate	10	0	HEK293T	2	0	1073	0.0298229	0.970177	0.123656	0.776177	0.0451489	0.178674	0.876344	0.00123762	0.332921	0	1080.25	0.142406	0.776982	0.0533037	0.169714	0.857594	0.00453037	0.323128	0.00113292	#DIV/0!
BAY-294	Multiplex	EUB0000743a	CC1=NC(N[C@H](C2=CC(C3=CC=CC=C3CNC)=CS2)C)=C4C=C(OC)C(OC)=CC4=N1	Chemogenomic candidate	10	12	human fibroblast	1	3.2497	343	0.297376	0.702624	0.435484	0.481328	0.261411	0.257261	0.564516	0.344828	0.0431034	0.189655	230.667	0.695283	0.596796	0.258529	0.144676	0.304717	0.0342007	0.0357415	0.0583164	1.23771	tag healthy nuclei < 50 %
BAY-294	Multiplex	EUB0000743a	CC1=NC(N[C@H](C2=CC(C3=CC=CC=C3CNC)=CS2)C)=C4C=C(OC)C(OC)=CC4=N1	Chemogenomic candidate	10	0	human fibroblast	2	0	103	0.23301	0.76699	0.647059	0.455696	0.329114	0.21519	0.352941	0.25	0.333333	0.111111	99.3333	0.557903	0.293865	0.595118	0.111016	0.442097	0.112114	0.290215	0.0427216	#DIV/0!	tag healthy nuclei < 50 %
BAY-294	Multiplex	EUB0000743a	CC1=NC(N[C@H](C2=CC(C3=CC=CC=C3CNC)=CS2)C)=C4C=C(OC)C(OC)=CC4=N1	Chemogenomic candidate	10	24	human fibroblast	1	0.542052	322	0.413043	0.586957	0.548387	0.497354	0.174603	0.328042	0.451613	0.319149	0.0531915	0.0957447	242.833	0.651394	0.612787	0.255064	0.132149	0.348606	0.025027	0.0173706	0.0467803	1.19614	tag healthy nuclei < 50 %
BAY-294	Multiplex	EUB0000743a	CC1=NC(N[C@H](C2=CC(C3=CC=CC=C3CNC)=CS2)C)=C4C=C(OC)C(OC)=CC4=N1	Chemogenomic candidate	10	0	human fibroblast	2	0	78	0.320513	0.679487	0.166667	0.415094	0.471698	0.113208	0.833333	0.0909091	0.272727	0.0909091	99.3333	0.557903	0.293865	0.595118	0.111016	0.442097	0.112114	0.290215	0.0427216	#DIV/0!	tag healthy nuclei < 50 %
BAY-294	Multiplex	EUB0000743a	CC1=NC(N[C@H](C2=CC(C3=CC=CC=C3CNC)=CS2)C)=C4C=C(OC)C(OC)=CC4=N1	Chemogenomic candidate	10	24	human fibroblast	2	13907.4	219	0.374429	0.625571	0.317073	0.364964	0.335766	0.29927	0.682927	0.44	0.04	0.08	80.0833	0.552381	0.346171	0.555718	0.0981105	0.447619	0.11087	0.120814	0.103	231110	tag healthy nuclei < 50 %
BAY-294	Multiplex	EUB0000743a	CC1=NC(N[C@H](C2=CC(C3=CC=CC=C3CNC)=CS2)C)=C4C=C(OC)C(OC)=CC4=N1	Chemogenomic candidate	10	24	human fibroblast	1	-0.998729	256	0.144531	0.855469	0.89916	0.0730594	0.383562	0.543379	0.10084	0.4375	0.25	0.0625	242.833	0.651394	0.612787	0.255064	0.132149	0.348606	0.025027	0.0173706	0.0467803	1.19614	tag healthy nuclei < 50 %
BAY-294	Multiplex	EUB0000743a	CC1=NC(N[C@H](C2=CC(C3=CC=CC=C3CNC)=CS2)C)=C4C=C(OC)C(OC)=CC4=N1	Chemogenomic candidate	10	0	HEK293T	1	0	838	0.195039	0.804961	0.17757	0.483193	0.217087	0.29972	0.82243	0.0173913	0.185507	0.0492754	865.667	0.13691	0.491163	0.230041	0.278796	0.86309	0.0185405	0.129798	0.0320833	#DIV/0!	tag healthy nuclei < 50 %
BAY-294	Multiplex	EUB0000743a	CC1=NC(N[C@H](C2=CC(C3=CC=CC=C3CNC)=CS2)C)=C4C=C(OC)C(OC)=CC4=N1	Chemogenomic candidate	10	12	HEK293T	1	-0.983279	272	0.191176	0.808824	0.834254	0.00909091	0.168182	0.822727	0.165746	0.5	1	0	274.667	0.427177	0.372026	0.131275	0.496699	0.572823	0.324854	0.687273	0.0469186	1.209	tag healthy nuclei < 50 %
BAY-294	Multiplex	EUB0000743a	CC1=NC(N[C@H](C2=CC(C3=CC=CC=C3CNC)=CS2)C)=C4C=C(OC)C(OC)=CC4=N1	Chemogenomic candidate	10	0	human fibroblast	1	0	121	0.123967	0.876033	0.5	0.367925	0.367925	0.264151	0.5	0.307692	0.230769	0	125.417	0.662404	0.310276	0.328567	0.361157	0.337596	0.203306	0.230525	0.0840641	#DIV/0!	tag healthy nuclei < 50 %
BAY-294	Multiplex	EUB0000743a	CC1=NC(N[C@H](C2=CC(C3=CC=CC=C3CNC)=CS2)C)=C4C=C(OC)C(OC)=CC4=N1	Chemogenomic candidate	10	0	HEK293T	2	0	243	0.0329218	0.967078	0.0738255	0.280851	0.0851064	0.634043	0.926174	0.030303	0.212121	0	233.167	0.0929753	0.24237	0.0798532	0.677777	0.907025	0.0412417	0.171457	0.0110984	#DIV/0!	tag healthy nuclei < 50 %
BAY-294	Multiplex	EUB0000743a	CC1=NC(N[C@H](C2=CC(C3=CC=CC=C3CNC)=CS2)C)=C4C=C(OC)C(OC)=CC4=N1	Chemogenomic candidate	10	24	human fibroblast	2	-1	73	0.383562	0.616438	0.933333	0.0666667	0.6	0.333333	0.0666667	0	1	0.333333	80.0833	0.552381	0.346171	0.555718	0.0981105	0.447619	0.11087	0.120814	0.103	231110	tag healthy nuclei < 50 %, tag mitochondrial mass > 50 %
BAY-294	Multiplex	EUB0000743a	CC1=NC(N[C@H](C2=CC(C3=CC=CC=C3CNC)=CS2)C)=C4C=C(OC)C(OC)=CC4=N1	Chemogenomic candidate	10	24	HEK293T	2	-0.610685	903	0.125138	0.874862	0.531835	0.234177	0.0898734	0.675949	0.468165	0.497297	0.854054	0.113514	3025.33	0.160951	0.737455	0.183731	0.0788139	0.839049	0.452063	0.229554	0.0699568	0.474195	tag healthy nuclei < 50 %, tag mitochondrial mass > 50 %
BAY-294	Multiplex	EUB0000743a	CC1=NC(N[C@H](C2=CC(C3=CC=CC=C3CNC)=CS2)C)=C4C=C(OC)C(OC)=CC4=N1	Chemogenomic candidate	10	0	HEK293T	1	0	277	0.0830325	0.916968	0.291429	0.216535	0.0944882	0.688976	0.708571	0.0181818	0.818182	0.0181818	256.5	0.333294	0.212413	0.0958204	0.691766	0.666706	0.0141172	0.774309	0.00115741	#DIV/0!	tag healthy nuclei < 50 %, tag mitochondrial mass > 50 %
BAY-294	Multiplex	EUB0000743a	CC1=NC(N[C@H](C2=CC(C3=CC=CC=C3CNC)=CS2)C)=C4C=C(OC)C(OC)=CC4=N1	Chemogenomic candidate	10	24	HEK293T	1	-0.982859	284	0.140845	0.859155	0.712766	0.00409836	0.22541	0.770492	0.287234	0	1	0	293.167	0.429543	0.395461	0.147538	0.457001	0.570457	0.312274	0.510446	0.0420248	1.14297	tag healthy nuclei < 50 %, tag mitochondrial mass > 50 %
BAY-294	Multiplex	EUB0000743a	CC1=NC(N[C@H](C2=CC(C3=CC=CC=C3CNC)=CS2)C)=C4C=C(OC)C(OC)=CC4=N1	Chemogenomic candidate	10	48	human fibroblast	2	-0.999045	104	0.317308	0.682692	1	0.084507	0.84507	0.0704225	0	0	1	0	108	0.498611	0.755765	0.214424	0.0298114	0.501389	0.304063	0.0278827	0.153127	1.11404	tag healthy nuclei < 50 %, tag mitochondrial mass > 50 %
BAY-294	Multiplex	EUB0000743a	CC1=NC(N[C@H](C2=CC(C3=CC=CC=C3CNC)=CS2)C)=C4C=C(OC)C(OC)=CC4=N1	Chemogenomic candidate	10	24	human fibroblast	1	-0.905711	83	0.313253	0.686747	0.892857	0.210526	0.298246	0.491228	0.107143	0.833333	0.5	0.5	106.75	0.494315	0.513538	0.210808	0.275654	0.505685	0.339408	0.0326339	0.298699	1.11839	tag healthy nuclei < 50 %, tag tubulin effect > 50 %
BAY-294	Multiplex	EUB0000743a	CC1=NC(N[C@H](C2=CC(C3=CC=CC=C3CNC)=CS2)C)=C4C=C(OC)C(OC)=CC4=N1	Chemogenomic candidate	10	12	human fibroblast	2	2.69583e+18	84	0.27381	0.72619	0.789474	0.147541	0.540984	0.311475	0.210526	0.777778	0.333333	0.444444	84.3333	0.520833	0.311795	0.58592	0.102285	0.479167	0.125354	0.149616	0.0949875	7.64557e+11	tag healthy nuclei < 50 %, tag tubulin effect > 50 %
BAY-294	Multiplex	EUB0000743a	CC1=NC(N[C@H](C2=CC(C3=CC=CC=C3CNC)=CS2)C)=C4C=C(OC)C(OC)=CC4=N1	Chemogenomic candidate	10	12	human fibroblast	1	-0.98729	297	0.0673401	0.93266	0.565517	0.166065	0.310469	0.523466	0.434483	0.695652	0.326087	0.347826	230.667	0.695283	0.596796	0.258529	0.144676	0.304717	0.0342007	0.0357415	0.0583164	1.23771	tag healthy nuclei < 50 %, tag tubulin effect > 50 %
BAY-294	Multiplex	EUB0000743a	CC1=NC(N[C@H](C2=CC(C3=CC=CC=C3CNC)=CS2)C)=C4C=C(OC)C(OC)=CC4=N1	Chemogenomic candidate	10	12	human fibroblast	1	-0.996859	73	0.150685	0.849315	0.820513	0.0967742	0.274194	0.629032	0.179487	0.833333	0.333333	0.333333	107.083	0.631736	0.44459	0.220734	0.334676	0.368264	0.315502	0.0769574	0.274792	1.29875	tag healthy nuclei < 50 %, tag tubulin effect > 50 %
[truncated: 9,353 more rows]
